# Supplementary material for: Disruption of Proteostasis by Natural Products and Synthetic Compounds That Induce Pervasive Unfolding of Proteins: Therapeutic Implications
Source: Pharmaceuticals (Basel). 2023 Apr 19;16(4):616. doi: 10.3390/ph16040616 (PMC10145903; doi:10.3390/ph16040616)
Supplement: Supplementary file 1 [file pharmaceuticals-16-00616-s001.zip]

Archive with 4 entries (4 files):
- Contents of Supplementary Tables S1-16.pdf
- Supplemental tables S1-15.xls
- Supplementary Methods.pdf
- Table S16 revised.pdf
