# Supplementary material for: Disruption of Proteostasis by Natural Products and Synthetic Compounds That Induce Pervasive Unfolding of Proteins: Therapeutic Implications
Source: Pharmaceuticals (Basel). 2023 Apr 19;16(4):616. doi: 10.3390/ph16040616 (PMC10145903; doi:10.3390/ph16040616)
Supplement: Supplementary file 1 [file pharmaceuticals-16-00616-s001.zip › Supplemental tables S1-15.xls]

## Sheet: Supplemental Table S1
Supplemental Table S1
UniProtKB Entry	UniProtKB Entry name	Exp. 1	Exp. 1	Exp. 2	Exp. 2	Exp. 3	Exp.3	Exp. 4	Exp. 4	Exp. 4	Exp. 1	Exp. 1	Exp. 2	Exp. 3	Exp. 3	Exp. 1	Exp. 2	Exp. 3	Exp. 4	Zq average IHSF115	Zq average C	p-value IHSF115 vs C	D Zq (IHSF115 - C)	Description
		Zq C-1	Zq C-2	Zq C-3	Zq C-4	Zq C-5	Zq C-6	Zq C-7	Zq C-8	Zq C-9	Zq IHSF115-1	Zq IHSF115-2	Zq IHSF115-3	Zq IHSF115-4	Zq IHSF115-5	Np	Np	Np	Np
O60566	BUB1B_HUMAN	-1.74017	-2.05733	-3.20342	-4.6187	-0.851185	-0.83849	-0.983373	-1.2285	-1.0609	3.99651	3.8039	4.76436	0.655859	0.814605	20	14	16	21	2.80705	-1.84245	0.000149918	4.6495	BUB1B_HUMAN Mitotic checkpoint serine/threonine-protein kinase BUB1 beta OS=Homo sapiens GN=BUB1B PE=1 SV=3
P60660	MYL6_HUMAN	-5.42597	-1.95978	-4.37138	-6.21782	0.427082	-0.31064	-1.09091	-1.18859	-1.03149	2.49222	1.17154	2.11873	1.70002	1.20668	11	9	9	11	1.73784	-2.35217	0.00290478	4.09001	MYL6_HUMAN Myosin light polypeptide 6 OS=Homo sapiens GN=MYL6 PE=1 SV=2
P04792	HSPB1_HUMAN	-4.9168	-0.742321	1.06512	0.0115995	-0.534941	-1.26919	-1.38654	-1.72	-1.60848	3.7649	4.75484	2.79882	1.50963	1.07159	22	13	20	17	2.77996	-1.23351	0.000750384	4.01346	HSPB1_HUMAN Heat shock protein beta-1 OS=Homo sapiens GN=HSPB1 PE=1 SV=2
P49643	PRI2_HUMAN	-2.26596	-1.80838	-1.48396	-2.54445	-0.162046	-0.398739	-0.627835	-0.854148	-0.45011	2.24556	4.37239	3.92497	1.41716	1.99441	10	10	10	10	2.7909	-1.17729	1.63076e-05	3.96819	PRI2_HUMAN DNA primase large subunit OS=Homo sapiens GN=PRIM2 PE=1 SV=2
P63241	IF5A1_HUMAN	-3.50974	-5.18127	-2.84147	0.141529	-0.626911	-1.21772	-2.25395	-1.23776	-1.91447	3.97249	3.20164	2.39281	0.0262924	-0.340355	5	5	5	5	1.85058	-2.07131	0.0015118	3.92188	IF5A1_HUMAN Eukaryotic translation initiation factor 5A-1 OS=Homo sapiens GN=EIF5A PE=1 SV=2
P19105	ML12A_HUMAN	-4.16536	-2.17379	-4.03783	-5.21235	0.230135	-0.700866	-1.32901	-1.23356	-1.29619	2.44551	1.04913	1.60832	1.57179	1.21562	19	11	14	13	1.57807	-2.2132	0.000808755	3.79128	ML12A_HUMAN Myosin regulatory light chain 12A OS=Homo sapiens GN=MYL12A PE=1 SV=2
P49721	PSB2_HUMAN	-2.52389	-3.49809	0.631371	-0.98871	-1.69662	-1.94674	-1.88992	-2.1625	-2.01983	5.80636	4.37526	0.866397	-0.737316	-0.596472	7	4	8	8	1.94285	-1.78832	0.00505067	3.73117	PSB2_HUMAN Proteasome subunit beta type-2 OS=Homo sapiens GN=PSMB2 PE=1 SV=1
O00625	PIR_HUMAN	-3.48508	-2.33109	-1.08222	-3.34621	-1.84595	-1.94661	-2.32876	-2.46707	-2.23917	1.07291	2.36438	3.41615	-0.162424	0.0827915	5	2	8	7	1.35476	-2.34135	4.41839e-05	3.69611	PIR_HUMAN Pirin OS=Homo sapiens GN=PIR PE=1 SV=1
Q96NU1	SAM11_HUMAN	-2.9547	-1.26808	0.337337	-0.635753	-0.38647	-1.01331	-1.58595	-1.68848	-0.606536	3.20408	4.37151	1.87696	1.31965	1.80851	2	2	3	3	2.51614	-1.0891	5.10891e-05	3.60525	SAM11_HUMAN Sterile alpha motif domain-containing protein 11 OS=Homo sapiens GN=SAMD11 PE=1 SV=3
P49588	SYAC_HUMAN	-3.4329	-1.72971	-2.26878	-4.23418	-0.867728	-1.17644	-0.945873	-1.40574	-1.67596	0.665252	2.82197	2.43249	0.651353	1.12785	37	30	38	37	1.53978	-1.97081	0.000106814	3.5106	SYAC_HUMAN Alanine--tRNA ligase, cytoplasmic OS=Homo sapiens GN=AARS PE=1 SV=2
Q9Y2V2	CHSP1_HUMAN	-4.45999	-2.28902	-1.10769	-2.0192	-1.26721	-1.33951	-1.87623	-1.79026	-1.93336	2.02002	4.6868	1.03691	-0.819213	-0.177443	3	1	2	3	1.34942	-2.00916	0.00164631	3.35858	CHSP1_HUMAN Calcium-regulated heat-stable protein 1 OS=Homo sapiens GN=CARHSP1 PE=1 SV=2
O75717	WDHD1_HUMAN	-0.959529	-1.31576	-1.53278	-2.07017	-0.48886	-0.562545	-0.566468	-0.814743	-0.635199	2.5392	3.13568	3.61035	1.1388	1.35412	29	15	17	21	2.35563	-0.994005	4.61233e-06	3.34963	WDHD1_HUMAN WD repeat and HMG-box DNA-binding protein 1 OS=Homo sapiens GN=WDHD1 PE=1 SV=1
P25325	THTM_HUMAN	-3.78349	-1.02488	-1.86433	-2.00105	0.0089512	-0.865366	-0.982042	-0.880729	-0.865804	1.79794	3.52927	2.17324	1.2067	1.12829	8	6	5	7	1.96709	-1.36208	9.98684e-05	3.32917	THTM_HUMAN 3-mercaptopyruvate sulfurtransferase OS=Homo sapiens GN=MPST PE=1 SV=3
Q8TCG1	CIP2A_HUMAN	-2.18573	-2.00963	-1.28966	-1.58079	-0.44566	-0.704423	-0.991938	-0.951497	-0.542575	2.00139	2.85572	3.10294	1.20882	1.52019	23	12	17	17	2.13781	-1.1891	1.89298e-06	3.32691	CIP2A_HUMAN Protein CIP2A OS=Homo sapiens GN=KIAA1524 PE=1 SV=2
P40763	STAT3_HUMAN	-2.23966	-0.995358	-1.71988	-2.52045	-0.16925	-0.671462	-1.47613	-1.7131	-1.25561	0.986926	2.83738	2.98547	1.16939	1.43694	26	15	19	19	1.88322	-1.41788	1.03664e-05	3.3011	STAT3_HUMAN Signal transducer and activator of transcription 3 OS=Homo sapiens GN=STAT3 PE=1 SV=2
P25789	PSA4_HUMAN	-1.41434	-2.94132	-1.109	-0.888563	-1.99656	-2.30666	-2.23314	-1.81799	-2.20392	3.52781	3.30778	2.67742	-1.34384	-1.20327	13	8	11	13	1.39318	-1.87905	0.0021935	3.27224	PSA4_HUMAN Proteasome subunit alpha type-4 OS=Homo sapiens GN=PSMA4 PE=1 SV=1
Q6KB66	K2C80_HUMAN	-2.75339	-0.640662	-1.17715	-3.22534	0.0116508	-0.323222	0.167619	0.244477	-0.72905	2.18255	4.00339	1.74012	2.08652	1.64082	32	7	16	17	2.33068	-0.936118	0.000298135	3.2668	K2C80_HUMAN Keratin, type II cytoskeletal 80 OS=Homo sapiens GN=KRT80 PE=1 SV=2
O14818	PSA7_HUMAN	-1.82551	-2.58304	0.0590626	-1.45913	-2.32782	-2.52962	-3.11097	-3.37947	-3.04334	3.59177	2.91459	1.9121	-1.75703	-1.66908	6	11	10	9	0.998472	-2.24443	0.00518958	3.2429	PSA7_HUMAN Proteasome subunit alpha type-7 OS=Homo sapiens GN=PSMA7 PE=1 SV=1
P52895	AK1C2_HUMAN	-1.99374	-1.36823	-2.91576	-3.68148	0.505191	-0.37946	-1.04484	-1.26881	-0.372758	-0.732888	0.59632	3.74358	2.7139	2.65418	24	22	16	16	1.79502	-1.3911	0.00247095	3.18612	AK1C2_HUMAN Aldo-keto reductase family 1 member C2 OS=Homo sapiens GN=AKR1C2 PE=1 SV=3
AAB82573	RENILLA LUCIFERASE	-2.763	-3.43602	0.017932	0.633102	-0.241995	-0.504139	-0.251131	-0.41886	-0.660373	2.94745	2.65667	1.99383	1.74536	2.27841	9	5	4	3	2.32435	-0.847165	0.000292623	3.17151	UPI000002D71C_RENILLA_LUCIFERASE
O95999	BCL10_HUMAN	-3.60552	-2.43567	-0.470469	-1.52496	-0.97052	-1.07741	-0.868199	-1.003	-0.389664	0.872765	3.43937	3.4062	0.511872	0.678509	4	1	2	2	1.78174	-1.37171	0.000543231	3.15345	BCL10_HUMAN B-cell lymphoma/leukemia 10 OS=Homo sapiens GN=BCL10 PE=1 SV=1
P33981	TTK_HUMAN	-0.785697	-1.53902	0.230474	-1.62815	-0.595153	-0.74777	-0.50141	-0.510177	-0.524525	2.93971	2.88185	3.42801	0.922582	1.88003	11	9	3	5	2.41044	-0.733492	6.23636e-06	3.14393	TTK_HUMAN Dual specificity protein kinase TTK OS=Homo sapiens GN=TTK PE=1 SV=2
Q9UNF1	MAGD2_HUMAN	-2.58426	-0.584495	-1.37811	-2.43607	0.126707	-0.545151	-0.931247	-1.03596	-0.650829	1.17345	3.19989	2.45486	1.55799	1.74448	30	13	28	28	2.02613	-1.11327	2.8839e-05	3.1394	MAGD2_HUMAN Melanoma-associated antigen D2 OS=Homo sapiens GN=MAGED2 PE=1 SV=2
Q99873	ANM1_HUMAN	-0.696644	-2.64569	-1.1037	-3.42423	-0.698511	-0.493179	-0.258371	0.101431	0.0844587	1.61705	1.92665	5.79876	-0.0146791	0.957089	14	15	9	12	2.05698	-1.01494	0.00537507	3.07191	ANM1_HUMAN Protein arginine N-methyltransferase 1 OS=Homo sapiens GN=PRMT1 PE=1 SV=2
Q53GA4	PHLA2_HUMAN	-2.06152	-1.36406	-0.0897071	-0.417558	-0.0437947	-0.125665	0.174433	-0.168935	-0.540121	3.58744	4.16203	1.25962	1.64856	2.05808	6	1	1	1	2.54315	-0.515213	8.26724e-05	3.05836	PHLA2_HUMAN Pleckstrin homology-like domain family A member 2 OS=Homo sapiens GN=PHLDA2 PE=1 SV=2
Q9NVI1	FANCI_HUMAN	-1.83021	-1.77482	-1.8608	-2.04573	0.348293	0.0361457	-0.331749	-0.481213	-0.0473587	2.10762	3.58436	1.92026	1.63473	1.57336	29	25	27	25	2.16407	-0.887494	6.98572e-05	3.05156	FANCI_HUMAN Fanconi anemia group I protein OS=Homo sapiens GN=FANCI PE=1 SV=4
Q9HBM1	SPC25_HUMAN	-2.00621	-0.451785	-0.720491	-2.05084	-0.342042	-0.427782	-0.408236	-1.19418	-0.736486	2.081	3.98842	1.81334	1.31908	1.2768	6	4	2	6	2.09573	-0.92645	3.40147e-05	3.02218	SPC25_HUMAN Kinetochore protein Spc25 OS=Homo sapiens GN=SPC25 PE=1 SV=1
Q13085	ACACA_HUMAN	-1.71424	-1.67058	-0.693472	-3.46507	-0.606572	-1.07556	-1.38449	-1.36518	-0.851662	0.827704	2.23435	2.63913	1.22688	1.04827	44	48	49	46	1.59527	-1.4252	3.21478e-05	3.02047	ACACA_HUMAN Acetyl-CoA carboxylase 1 OS=Homo sapiens GN=ACACA PE=1 SV=2
O00762	UBE2C_HUMAN	-2.76768	-2.21153	-0.661688	-1.16994	-1.21365	-1.41394	-1.58162	-1.83151	-1.62629	1.26069	3.26684	1.02911	0.752717	0.583206	4	4	5	6	1.37851	-1.60865	2.33665e-05	2.98716	UBE2C_HUMAN Ubiquitin-conjugating enzyme E2 C OS=Homo sapiens GN=UBE2C PE=1 SV=1
P78318	IGBP1_HUMAN	-2.16089	-1.42964	0.659167	0.38917	-0.987715	-0.752119	-0.142439	-0.418437	-0.348515	2.99144	3.93037	3.27533	0.609341	1.23268	9	5	10	7	2.40783	-0.576824	0.000353292	2.98466	IGBP1_HUMAN Immunoglobulin-binding protein 1 OS=Homo sapiens GN=IGBP1 PE=1 SV=1
P49642	PRI1_HUMAN	-1.22615	-1.36925	-1.15385	-1.37641	0.390999	-0.160095	-0.333414	-0.572403	-0.120543	0.940037	2.97868	2.96171	2.1601	2.55658	10	8	9	8	2.31942	-0.657901	7.80888e-06	2.97732	PRI1_HUMAN DNA primase small subunit OS=Homo sapiens GN=PRIM1 PE=1 SV=1
Q86Y56	DAAF5_HUMAN	-1.72959	-1.53607	-0.154616	-2.50183	-0.370572	-0.688247	-0.819386	-1.25845	-1.02366	1.33777	2.33854	3.17697	1.03877	1.33341	19	18	16	11	1.84509	-1.12027	2.03812e-05	2.96536	DAAF5_HUMAN Dynein assembly factor 5, axonemal OS=Homo sapiens GN=DNAAF5 PE=1 SV=4
P83436	COG7_HUMAN	-2.24351	-1.4777	0.0517601	-0.395417	-0.601145	-1.41534	-1.53841	-1.2055	-0.977644	1.55743	2.68184	2.93633	0.868737	1.30926	5	11	7	5	1.87072	-1.08921	1.59694e-05	2.95993	COG7_HUMAN Conserved oligomeric Golgi complex subunit 7 OS=Homo sapiens GN=COG7 PE=1 SV=1
Q6NXE6	ARMC6_HUMAN	-1.42193	-0.365315	-1.99819	-0.682261	0.152115	-0.160422	0.11473	-0.409813	-0.168224	1.92128	2.17669	3.5151	2.08011	2.31729	13	8	13	13	2.4021	-0.548812	6.21016e-06	2.95091	ARMC6_HUMAN Armadillo repeat-containing protein 6 OS=Homo sapiens GN=ARMC6 PE=1 SV=2
Q15054	DPOD3_HUMAN	-1.96155	-0.631275	0.0573774	-2.39778	0.000132542	-0.353579	0.140316	-0.490256	-0.059378	2.13115	3.37451	2.75242	1.64774	1.61571	13	2	7	6	2.30431	-0.632888	5.67909e-05	2.93719	DPOD3_HUMAN DNA polymerase delta subunit 3 OS=Homo sapiens GN=POLD3 PE=1 SV=2
Q9NR22	ANM8_HUMAN	-1.99775	-2.56258	0.779818	-3.26363	-0.53855	-0.188983	0.247907	0.619963	-0.179074	3.01427	2.35126	4.81907	-0.0180368	0.512288	2	2	2	1	2.13577	-0.786986	0.00774719	2.92276	ANM8_HUMAN Protein arginine N-methyltransferase 8 OS=Homo sapiens GN=PRMT8 PE=1 SV=2
Q9NSV4	DIAP3_HUMAN	-1.80303	-1.63119	-0.0243593	-2.34088	-0.458826	-0.676794	-0.35419	-0.37262	-0.367615	2.59435	3.14216	2.01417	1.11671	1.26033	23	18	15	15	2.02554	-0.892168	3.95962e-05	2.91771	DIAP3_HUMAN Protein diaphanous homolog 3 OS=Homo sapiens GN=DIAPH3 PE=1 SV=4
P02511	CRYAB_HUMAN	-3.82643	0.504476	0.682019	-0.472573	0.0545116	-0.40578	-1.62016	-1.65014	-0.825953	0.956953	6.12462	1.06734	1.27434	0.953665	6	2	2	3	2.07538	-0.840003	0.0107043	2.91538	CRYAB_HUMAN Alpha-crystallin B chain OS=Homo sapiens GN=CRYAB PE=1 SV=2
Q9H3U1	UN45A_HUMAN	-0.736471	-1.74755	-1.15434	-4.09547	-0.435911	-0.75112	-1.0178	-1.2605	-1.27921	1.38904	1.84239	2.05804	1.19961	1.15012	39	20	24	27	1.52784	-1.38649	9.83656e-05	2.91433	UN45A_HUMAN Protein unc-45 homolog A OS=Homo sapiens GN=UNC45A PE=1 SV=1
A0A024RA52	A0A024RA52_HUMAN	-0.143322	-1.02137	-3.52893	-0.863511	-2.86708	-2.28341	-3.11301	-3.10656	-3.07844	2.47151	2.09401	3.46757	-2.3089	-2.27737	7	5	10	8	0.689365	-2.22285	0.0170341	2.91221	A0A024RA52_HUMAN Proteasome subunit alpha type OS=Homo sapiens GN=PSMA2 PE=1 SV=1
Q9P287	BCCIP_HUMAN	-2.12911	-2.13346	-2.20652	-3.94289	-0.618599	-0.479466	-1.45178	-1.75339	-1.34036	0.942106	2.81023	1.77278	-0.16169	0.245685	7	5	7	8	1.12182	-1.78395	0.000437944	2.90578	BCCIP_HUMAN BRCA2 and CDKN1A-interacting protein OS=Homo sapiens GN=BCCIP PE=1 SV=1
Q8N0X7	SPG20_HUMAN	-1.57818	-1.41469	-0.056541	0.327021	-0.585451	-0.993634	-0.0668631	-0.534743	-0.498462	2.25885	3.48079	2.44068	1.37969	1.95411	8	5	9	10	2.30283	-0.600171	6.24023e-06	2.903	SPG20_HUMAN Spartin OS=Homo sapiens GN=SPG20 PE=1 SV=1
P35579	MYH9_HUMAN	-4.54254	-2.01087	-4.16926	-5.80947	1.01789	-0.103146	-0.307306	-0.43031	-0.473612	0.406426	-0.253854	1.42153	2.13706	1.43093	321	145	169	167	1.02842	-1.86985	0.0250411	2.89827	MYH9_HUMAN Myosin-9 OS=Homo sapiens GN=MYH9 PE=1 SV=4
P49720	PSB3_HUMAN	-0.125735	-0.644174	0.453787	-1.4619	-2.17471	-2.30365	-3.71472	-3.76776	-4.11769	2.9849	1.97587	2.15112	-1.40604	-1.45098	4	6	7	7	0.850977	-1.98406	0.0167797	2.83504	PSB3_HUMAN Proteasome subunit beta type-3 OS=Homo sapiens GN=PSMB3 PE=1 SV=2
Q9H8V3	ECT2_HUMAN	-1.31953	0.147297	-2.26004	-2.68187	0.838749	0.468805	0.498423	0.167693	0.362377	2.55117	3.21173	2.64566	1.73565	1.75522	12	12	6	4	2.37989	-0.419788	0.000821081	2.79967	ECT2_HUMAN Protein ECT2 OS=Homo sapiens GN=ECT2 PE=1 SV=4
Q9BYX2	TBD2A_HUMAN	-2.20501	-1.57768	-0.844953	-2.12128	-0.891681	-1.60101	-0.854746	-1.11979	-1.03786	1.32052	2.44029	2.6513	0.426804	0.280447	12	9	8	5	1.42387	-1.36156	3.07564e-05	2.78543	TBD2A_HUMAN TBC1 domain family member 2A OS=Homo sapiens GN=TBC1D2 PE=1 SV=3
Q13309	SKP2_HUMAN	-1.40584	-1.02106	-1.11472	-2.4281	-0.00169499	-0.407109	0.356814	0.222599	0.231134	2.72136	3.74851	1.35205	1.71322	1.21456	5	6	3	3	2.14994	-0.618665	0.000294933	2.7686	SKP2_HUMAN S-phase kinase-associated protein 2 OS=Homo sapiens GN=SKP2 PE=1 SV=2
P52306	GDS1_HUMAN	-1.4055	-2.46937	-2.31106	-2.38662	0.0617921	-0.00864526	-1.38734	-0.815183	-0.842026	1.48771	3.26931	0.721518	1.19344	0.708501	8	10	9	8	1.4761	-1.28488	0.000337336	2.76098	GDS1_HUMAN Rap1 GTPase-GDP dissociation stimulator 1 OS=Homo sapiens GN=RAP1GDS1 PE=1 SV=3
Q04323	UBXN1_HUMAN	-2.85066	-1.06046	-2.78066	-1.4363	-0.610253	-0.805132	-1.05348	-0.954925	-0.92193	1.58421	2.55359	1.18471	0.688519	0.850761	8	10	10	12	1.37236	-1.38598	5.26759e-05	2.75834	UBXN1_HUMAN UBX domain-containing protein 1 OS=Homo sapiens GN=UBXN1 PE=1 SV=2
P09884	DPOLA_HUMAN	-1.19805	-0.50337	-1.07196	-1.86049	0.00160218	-0.107082	0.0683094	-0.102082	0.278855	1.72836	2.84439	2.96772	1.65674	2.02793	26	27	28	20	2.24503	-0.499362	1.18292e-05	2.74439	DPOLA_HUMAN DNA polymerase alpha catalytic subunit OS=Homo sapiens GN=POLA1 PE=1 SV=2
Q15555	MARE2_HUMAN	-2.62033	-1.50034	-0.565029	-0.784599	0.458475	0.266118	-0.374863	-0.483649	-0.487294	1.64165	2.58147	2.63013	1.39932	2.06572	9	9	12	9	2.06366	-0.676834	6.15884e-05	2.74049	MARE2_HUMAN Microtubule-associated protein RP/EB family member 2 OS=Homo sapiens GN=MAPRE2 PE=1 SV=1
Q12979	ABR_HUMAN	-1.44513	-0.845693	-0.00661825	-1.40932	-1.211	-1.63637	-1.34337	-1.62352	-1.25733	1.76243	2.42945	2.58764	0.333314	0.528175	10	6	11	8	1.5282	-1.1976	2.33267e-05	2.7258	ABR_HUMAN Active breakpoint cluster region-related protein OS=Homo sapiens GN=ABR PE=2 SV=2
Q8NBT2	SPC24_HUMAN	-1.75553	-0.203697	-1.50045	-0.520214	0.0986309	0.0318843	-0.823242	-1.12628	-1.08974	1.64321	3.00537	1.78435	1.39147	1.93194	5	5	5	4	1.95127	-0.765403	7.2634e-06	2.71667	SPC24_HUMAN Kinetochore protein Spc24 OS=Homo sapiens GN=SPC24 PE=1 SV=2
Q12834	CDC20_HUMAN	-0.904879	-0.396568	-0.93159	-2.41977	-0.104683	-0.291036	-0.102836	0.178362	-0.684839	2.60469	3.94321	2.06695	0.973352	0.773224	10	3	5	7	2.07229	-0.628649	0.000329701	2.70093	CDC20_HUMAN Cell division cycle protein 20 homolog OS=Homo sapiens GN=CDC20 PE=1 SV=2
Q9H853	TBA4B_HUMAN	-4.0209	-2.73707	-1.63875	-1.93904	-0.23655	-0.142478	-0.563643	-0.484326	-0.564506	0.352178	2.6233	1.60831	0.813658	1.18798	2	2	1	1	1.31709	-1.3697	0.00167449	2.68678	TBA4B_HUMAN Putative tubulin-like protein alpha-4B OS=Homo sapiens GN=TUBA4B PE=5 SV=2
Q8NBF2	NHLC2_HUMAN	-1.19047	-1.60908	-1.71912	-1.38338	-0.763241	-0.741456	-1.18504	-1.66681	-1.30932	0.829794	2.51944	2.18573	0.515956	0.895418	9	7	10	11	1.38927	-1.28532	3.56792e-06	2.67459	NHLC2_HUMAN NHL repeat-containing protein 2 OS=Homo sapiens GN=NHLRC2 PE=1 SV=1
Q7Z3E5	ARMC9_HUMAN	-1.18252	-1.9056	-1.45703	-1.84089	-0.208996	-0.777981	-0.767122	-0.74245	-0.54851	1.76467	0.28158	2.79782	1.48567	1.78803	3	6	1	4	1.62355	-1.0479	1.96698e-05	2.67145	ARMC9_HUMAN LisH domain-containing protein ARMC9 OS=Homo sapiens GN=ARMC9 PE=1 SV=2
Q7Z7E8	UB2Q1_HUMAN	-1.10922	-1.38061	-0.228275	-1.79921	-0.465212	-0.802066	-1.29307	-1.11938	-1.12934	1.11282	2.35112	2.9106	0.943005	0.836174	6	7	6	7	1.63074	-1.03626	1.14741e-05	2.66701	UB2Q1_HUMAN Ubiquitin-conjugating enzyme E2 Q1 OS=Homo sapiens GN=UBE2Q1 PE=1 SV=1
Q96B23	CR025_HUMAN	-1.66529	-0.499646	-0.169127	-3.08431	-1.74938	-1.2595	-1.87024	-2.74226	-2.2295	1.52968	2.4073	1.82719	-0.542178	-0.373974	3	3	4	3	0.969603	-1.69658	0.000947528	2.66619	CR025_HUMAN Uncharacterized protein C18orf25 OS=Homo sapiens GN=C18orf25 PE=1 SV=2
Q15366	PCBP2_HUMAN	-0.985637	-0.177769	-4.60291	-2.90875	0.29256	0.142842	-0.137528	-0.0123416	0.138752	1.14616	1.94477	3.16716	1.17842	1.24747	9	13	17	14	1.7368	-0.916754	0.00737623	2.65355	PCBP2_HUMAN Poly(rC)-binding protein 2 OS=Homo sapiens GN=PCBP2 PE=1 SV=1
Q68CZ2	TENS3_HUMAN	-1.58849	-0.405973	-1.05064	-0.826132	-0.0143948	-0.310023	-0.355679	-0.344966	-0.434056	2.55038	2.41672	2.81459	0.991538	1.46998	16	17	16	15	2.04864	-0.592262	4.09436e-06	2.6409	TENS3_HUMAN Tensin-3 OS=Homo sapiens GN=TNS3 PE=1 SV=2
P07437	TBB5_HUMAN	-2.91352	-2.43675	-2.37708	-0.551481	0.0309361	-0.259769	-0.894636	-0.789346	-0.608612	0.342917	3.56383	1.30821	0.853791	0.958507	7	5	5	4	1.40545	-1.20003	0.00147484	2.60548	TBB5_HUMAN Tubulin beta chain OS=Homo sapiens GN=TUBB PE=1 SV=2
Q9BTE6	AASD1_HUMAN	-2.22618	-0.803945	-0.955353	-1.32426	-1.3702	-1.37549	-1.03339	-1.03966	-1.15274	1.30831	1.55576	1.99574	0.676278	1.12625	8	6	5	5	1.33247	-1.25347	2.10348e-07	2.58594	AASD1_HUMAN Alanyl-tRNA editing protein Aarsd1 OS=Homo sapiens GN=AARSD1 PE=1 SV=2
Q15126	PMVK_HUMAN	-3.04275	-0.340765	-0.673664	-0.99184	0.596286	-0.0279101	-0.356345	-0.971036	-0.665028	0.31502	2.24454	2.7867	1.95846	2.02264	8	4	5	6	1.86547	-0.719228	0.000477783	2.5847	PMVK_HUMAN Phosphomevalonate kinase OS=Homo sapiens GN=PMVK PE=1 SV=3
Q9Y3Z3	SAMH1_HUMAN	-3.06195	-1.90065	0.463221	-0.540034	0.827621	-0.00893681	-0.177187	-0.522813	-0.375775	1.04477	3.0471	1.93822	2.00122	1.93192	22	17	13	11	1.99265	-0.588501	0.00093023	2.58115	SAMH1_HUMAN Deoxynucleoside triphosphate triphosphohydrolase SAMHD1 OS=Homo sapiens GN=SAMHD1 PE=1 SV=2
Q309B1	TR16L_HUMAN	-1.16231	-1.49155	-1.0448	-2.61906	-1.13265	-1.28471	-1.27295	-1.19973	-0.995333	0.440912	2.01528	3.13686	-0.0113831	0.46992	4	7	4	4	1.21032	-1.3559	0.000180697	2.56622	TR16L_HUMAN Tripartite motif-containing protein 16-like protein OS=Homo sapiens GN=TRIM16L PE=2 SV=3
Q5T6V5	CI064_HUMAN	-0.307352	-1.63833	-1.77333	-2.45746	-1.25032	-1.47203	-2.84216	-2.38867	-2.42424	1.18123	1.09979	1.09169	0.126331	0.0764573	5	5	9	9	0.715099	-1.83932	3.46117e-05	2.55442	CI064_HUMAN UPF0553 protein C9orf64 OS=Homo sapiens GN=C9orf64 PE=1 SV=1
Q96GX5	GWL_HUMAN	-2.15315	-1.34242	-1.60873	-0.957205	0.152251	-0.183204	0.0917052	-0.422268	0.129386	1.32724	2.28695	2.87241	1.28109	1.50481	7	4	7	3	1.8545	-0.699293	9.97738e-05	2.55379	GWL_HUMAN Serine/threonine-protein kinase greatwall OS=Homo sapiens GN=MASTL PE=1 SV=1
Q13424	SNTA1_HUMAN	-2.08182	-2.04065	-2.28027	-0.831368	-1.12859	-1.10765	-2.00768	-1.36191	-1.71833	1.18427	2.18106	2.5507	-0.58471	-0.663689	5	3	2	2	0.933526	-1.61759	0.000497228	2.55111	SNTA1_HUMAN Alpha-1-syntrophin OS=Homo sapiens GN=SNTA1 PE=1 SV=1
Q9HB07	MYG1_HUMAN	-2.0967	-2.28479	-1.06319	-2.89096	-1.65874	-1.49508	-0.802433	-0.722181	-0.837399	1.86273	3.14706	0.560474	-0.496345	-0.0341026	13	9	8	11	1.00796	-1.53905	0.00102098	2.54702	MYG1_HUMAN UPF0160 protein MYG1, mitochondrial OS=Homo sapiens GN=C12orf10 PE=1 SV=2
Q5T5P2	SKT_HUMAN	-0.955293	-1.03175	0.3734	-0.398855	-0.0504553	0.346695	-0.306342	-0.402545	0.226082	4.33567	2.77822	2.08482	0.55342	1.73424	21	9	14	12	2.29728	-0.244341	0.000308143	2.54162	SKT_HUMAN Sickle tail protein homolog OS=Homo sapiens GN=KIAA1217 PE=1 SV=2
P12004	PCNA_HUMAN	-0.173481	-1.31587	-1.52906	-1.2188	-2.14995	-1.74957	-1.63214	-1.44594	-1.33744	1.8786	2.88315	2.67349	-1.22827	-0.510144	24	10	13	18	1.13936	-1.39469	0.00224436	2.53406	PCNA_HUMAN Proliferating cell nuclear antigen OS=Homo sapiens GN=PCNA PE=1 SV=1
Q9BU89	DOHH_HUMAN	-3.87738	-0.683323	-0.349563	-0.301959	0.0587704	0.0607358	-0.358173	-0.460931	-0.824386	2.26755	2.91037	2.60678	0.236093	0.90175	9	10	6	6	1.78451	-0.748468	0.00248713	2.53298	DOHH_HUMAN Deoxyhypusine hydroxylase OS=Homo sapiens GN=DOHH PE=1 SV=1
P09488	GSTM1_HUMAN	-2.03532	-1.41475	-0.34763	-2.49368	1.27786	0.162469	-0.628387	-0.541237	0.220534	-0.0210866	1.37808	2.22136	3.1228	2.61455	12	8	10	11	1.86314	-0.64446	0.00274859	2.5076	GSTM1_HUMAN Glutathione S-transferase Mu 1 OS=Homo sapiens GN=GSTM1 PE=1 SV=3
Q9Y371	SHLB1_HUMAN	-1.39409	-0.690383	-0.0896468	-1.73537	-1.00526	-1.41054	-1.31378	-1.45978	-1.21038	1.14932	1.67462	2.21878	0.853224	0.898256	9	4	9	6	1.35884	-1.14547	1.8757e-06	2.50431	SHLB1_HUMAN Endophilin-B1 OS=Homo sapiens GN=SH3GLB1 PE=1 SV=1
Q13546	RIPK1_HUMAN	-1.56915	-0.953405	0.651287	-0.890655	-0.158055	-0.542018	-1.31141	-1.423	-1.02023	1.47002	1.96021	2.19059	1.30379	1.53966	10	9	5	4	1.69285	-0.801848	8.91915e-06	2.4947	RIPK1_HUMAN Receptor-interacting serine/threonine-protein kinase 1 OS=Homo sapiens GN=RIPK1 PE=1 SV=3
P00374	DYR_HUMAN	-3.45903	0.0296776	0.396237	1.27624	0.544199	0.35386	-0.330279	-0.882242	-0.491888	-0.22885	1.79968	3.56814	2.5045	3.39381	11	9	8	10	2.20746	-0.284803	0.00824972	2.49226	DYR_HUMAN Dihydrofolate reductase OS=Homo sapiens GN=DHFR PE=1 SV=2
P42224	STAT1_HUMAN	-1.95993	-0.776404	0.101145	-1.94287	-0.258202	-0.833595	-0.804238	-0.997452	-0.661999	0.603059	1.94585	2.62569	1.37786	1.35244	32	20	18	19	1.58098	-0.903727	3.93131e-05	2.48471	STAT1_HUMAN Signal transducer and activator of transcription 1-alpha/beta OS=Homo sapiens GN=STAT1 PE=1 SV=2
Q9NZT2	OGFR_HUMAN	-1.69507	-0.541351	-0.0618801	-0.490856	0.402478	-0.135609	-0.191726	-0.457319	-0.0778555	1.93802	2.46169	2.08626	1.69458	2.39463	11	6	14	13	2.11503	-0.361021	1.45769e-06	2.47606	OGFR_HUMAN Opioid growth factor receptor OS=Homo sapiens GN=OGFR PE=1 SV=3
Q6ZWJ1	STXB4_HUMAN	-1.72242	0.061746	-0.114391	-0.349057	-0.53312	-0.214465	0.549586	-1.42878	-2.00867	1.61602	2.54539	1.75179	1.31681	1.88625	4	3	2	1	1.82325	-0.639952	8.47995e-05	2.46321	STXB4_HUMAN Syntaxin-binding protein 4 OS=Homo sapiens GN=STXBP4 PE=1 SV=2
P21266	GSTM3_HUMAN	-1.58741	-0.829946	0.306599	-4.04703	1.54253	0.373028	-0.89217	-1.3871	0.184471	-1.46653	0.29481	3.40072	3.33246	3.21828	20	15	16	16	1.75595	-0.704114	0.0331826	2.46006	GSTM3_HUMAN Glutathione S-transferase Mu 3 OS=Homo sapiens GN=GSTM3 PE=1 SV=3
Q15121	PEA15_HUMAN	-0.526774	-0.746523	0.416879	-1.06449	-0.509675	-1.00447	-0.679477	-0.674227	-0.291057	2.84444	3.06446	0.560417	1.42015	1.53015	2	3	5	4	1.88392	-0.564424	4.36798e-05	2.44835	PEA15_HUMAN Astrocytic phosphoprotein PEA-15 OS=Homo sapiens GN=PEA15 PE=1 SV=2
Q9NYZ3	GTSE1_HUMAN	-2.65712	-0.905648	0.718724	-1.41464	0.411307	0.512896	0.262643	0.0443378	0.370445	2.80471	3.42576	1.10544	1.64868	1.75495	7	5	3	9	2.14791	-0.295229	0.0015173	2.44314	GTSE1_HUMAN G2 and S phase-expressed protein 1 OS=Homo sapiens GN=GTSE1 PE=1 SV=3
O95551	TYDP2_HUMAN	-1.75065	-1.25646	-0.441637	0.277899	-0.254212	-0.0685292	0.0156499	0.00821407	-0.0683842	2.69001	3.23976	2.8319	0.56438	0.83769	5	4	6	5	2.03275	-0.393124	0.000408705	2.42587	TYDP2_HUMAN Tyrosyl-DNA phosphodiesterase 2 OS=Homo sapiens GN=TDP2 PE=1 SV=1
Q6VY07	PACS1_HUMAN	-1.17988	-0.966067	-1.18813	-2.51218	-0.275356	-0.440923	-0.341854	-0.465161	0.235602	0.479543	1.41199	3.45493	1.15874	1.64577	9	10	10	5	1.63019	-0.792661	0.000460889	2.42286	PACS1_HUMAN Phosphofurin acidic cluster sorting protein 1 OS=Homo sapiens GN=PACS1 PE=1 SV=2
Q96I99	SUCB2_HUMAN	-3.13253	-0.957763	-2.89959	-3.89509	-0.819128	-1.557	-1.38058	-1.26403	-1.36656	-0.215469	0.982088	1.1363	0.230906	0.269957	22	15	16	20	0.480756	-1.91914	0.000708668	2.3999	SUCB2_HUMAN Succinate--CoA ligase [GDP-forming] subunit beta, mitochondrial OS=Homo sapiens GN=SUCLG2 PE=1 SV=2
P50748	KNTC1_HUMAN	-0.886717	-1.13685	-0.361448	-2.85464	-0.447766	-0.730833	-0.904851	-1.18229	-0.940443	0.90027	1.75465	2.94425	0.589284	0.557545	19	16	18	12	1.3492	-1.04954	0.000244258	2.39874	KNTC1_HUMAN Kinetochore-associated protein 1 OS=Homo sapiens GN=KNTC1 PE=1 SV=1
O14920	IKKB_HUMAN	-3.35952	0.200056	-0.470049	-0.340731	0.25517	-0.170012	0.341946	-0.225602	0.0483244	1.01712	2.74294	2.03825	2.02883	2.08914	4	6	4	3	1.98326	-0.413379	0.00101058	2.39664	IKKB_HUMAN Inhibitor of nuclear factor kappa-B kinase subunit beta OS=Homo sapiens GN=IKBKB PE=1 SV=1
O14777	NDC80_HUMAN	-0.414759	-1.45109	-1.24757	-1.0832	-0.117183	-0.242965	-0.305324	-0.7594	-0.326517	1.91859	2.12028	1.75057	1.44843	1.42514	13	11	16	13	1.7326	-0.660891	4.30356e-07	2.39349	NDC80_HUMAN Kinetochore protein NDC80 homolog OS=Homo sapiens GN=NDC80 PE=1 SV=1
Q9BV20	MTNA_HUMAN	-1.63719	-0.998195	-1.55998	-1.47739	-0.925859	-0.884954	-1.70004	-2.05686	-2.27058	0.49604	3.09318	0.372354	-0.11972	0.60926	5	3	6	6	0.890222	-1.50123	0.000239128	2.39145	MTNA_HUMAN Methylthioribose-1-phosphate isomerase OS=Homo sapiens GN=MRI1 PE=1 SV=1
Q15025	TNIP1_HUMAN	-3.10094	-0.582083	-0.56313	-2.05056	-0.415269	-0.348366	-0.0201282	-0.794428	-0.526097	3.08262	2.43569	0.0692677	0.746898	0.955211	7	6	4	1	1.45794	-0.933445	0.00191892	2.39138	TNIP1_HUMAN TNFAIP3-interacting protein 1 OS=Homo sapiens GN=TNIP1 PE=1 SV=2
Q07343	PDE4B_HUMAN	-1.81693	-1.56787	0.805023	-2.71286	-1.1203	-0.853911	-1.19318	-1.42438	-1.02175	0.678584	2.2488	1.40676	0.629037	0.911715	5	5	6	6	1.17498	-1.2118	0.000318727	2.38677	PDE4B_HUMAN cAMP-specific 3',5'-cyclic phosphodiesterase 4B OS=Homo sapiens GN=PDE4B PE=1 SV=1
P42226	STAT6_HUMAN	-1.84507	-0.115288	-1.94328	-1.85224	-0.549761	-0.766501	-1.30542	-0.991418	-0.855004	0.904185	1.12848	2.56107	0.774853	0.8827	9	6	11	5	1.25026	-1.136	3.94196e-05	2.38626	STAT6_HUMAN Signal transducer and activator of transcription 6 OS=Homo sapiens GN=STAT6 PE=1 SV=1
Q99436	PSB7_HUMAN	-0.956574	-1.11849	-0.274992	-0.459168	-3.38897	-3.4875	-2.68738	-2.52428	-2.82611	2.69417	2.35027	1.74704	-2.41347	-2.31699	7	1	9	10	0.412205	-1.96927	0.0354231	2.38148	PSB7_HUMAN Proteasome subunit beta type-7 OS=Homo sapiens GN=PSMB7 PE=1 SV=1
Q6DKJ4	NXN_HUMAN	-1.72442	-1.38803	-1.99534	-1.80073	-0.872996	-1.82265	-0.713361	-1.09247	-0.857516	0.364731	3.10475	1.46645	0.269542	-0.123077	5	5	7	6	1.01648	-1.36306	0.000314306	2.37954	NXN_HUMAN Nucleoredoxin OS=Homo sapiens GN=NXN PE=1 SV=2
Q13509	TBB3_HUMAN	-2.47822	-2.56053	-2.31735	-1.2397	-1.04041	-0.847231	-2.20329	-2.21256	-2.17255	-1.13314	1.09798	1.37288	1.02828	0.0337696	7	7	4	3	0.479954	-1.89687	0.000190002	2.37682	TBB3_HUMAN Tubulin beta-3 chain OS=Homo sapiens GN=TUBB3 PE=1 SV=2
P49427	UB2R1_HUMAN	-1.29906	-1.02398	-2.24898	-2.00273	-0.258332	-0.63697	-0.976475	-1.28094	-1.26632	0.130325	1.02965	1.47101	1.2813	1.77173	3	2	2	2	1.1368	-1.22153	1.83779e-05	2.35833	UB2R1_HUMAN Ubiquitin-conjugating enzyme E2 R1 OS=Homo sapiens GN=CDC34 PE=1 SV=2
Q8TAA3	PSA7L_HUMAN	-1.08911	-1.41506	0.443299	-1.61622	-1.68248	-1.67138	-2.62536	-2.46776	-2.83642	1.98134	2.21802	1.92622	-1.75614	-0.905343	3	2	3	4	0.692821	-1.66228	0.00869513	2.3551	PSA7L_HUMAN Proteasome subunit alpha type-7-like OS=Homo sapiens GN=PSMA8 PE=2 SV=3
Q8TB52	FBX30_HUMAN	-2.16939	-0.976294	-1.1488	-0.449806	-0.0113172	-0.354966	-0.965357	-1.54661	-1.57543	1.23651	1.57745	2.04093	0.8135	0.992513	3	3	3	1	1.33218	-1.022	1.99687e-05	2.35418	FBX30_HUMAN F-box only protein 30 OS=Homo sapiens GN=FBXO30 PE=1 SV=3
Q9H063	MAF1_HUMAN	-2.17293	0.356804	-1.713	-0.575915	-0.32069	-0.546326	-0.888405	-0.967315	-1.41843	0.762901	2.28011	0.593191	1.46439	2.07875	1	2	1	1	1.43587	-0.916244	0.000130642	2.35211	MAF1_HUMAN Repressor of RNA polymerase III transcription MAF1 homolog OS=Homo sapiens GN=MAF1 PE=1 SV=2
Q9P253	VPS18_HUMAN	-1.11132	-1.35271	-2.04639	-0.719344	-0.502364	-0.414157	-0.273106	-0.580089	-0.328232	2.79514	3.04566	0.754478	0.30447	0.758119	5	5	7	7	1.53157	-0.81419	0.000459333	2.34576	VPS18_HUMAN Vacuolar protein sorting-associated protein 18 homolog OS=Homo sapiens GN=VPS18 PE=1 SV=2
Q96SN8	CK5P2_HUMAN	-0.920416	-0.0032762	-0.234111	-2.38891	0.131047	0.479429	-0.904109	-0.333524	0.0354266	2.57759	1.93273	1.81168	1.31559	1.78701	24	17	13	2	1.88492	-0.459827	0.000111756	2.34475	CK5P2_HUMAN CDK5 regulatory subunit-associated protein 2 OS=Homo sapiens GN=CDK5RAP2 PE=1 SV=5
Q9NWX5	ASB6_HUMAN	-3.30221	-1.4021	1.13911	-2.32125	-0.161175	-0.287371	-0.181419	-0.790197	0.255415	1.13692	2.41357	1.19732	1.08482	1.90544	4	3	4	2	1.54761	-0.783467	0.00370128	2.33108	ASB6_HUMAN Ankyrin repeat and SOCS box protein 6 OS=Homo sapiens GN=ASB6 PE=1 SV=1
P61923	COPZ1_HUMAN	0.564222	-2.43515	-0.831032	-2.81786	-0.892128	-1.20721	-1.94122	-2.031	-2.09312	-0.00898461	1.74614	1.85395	0.0927784	0.367985	4	4	3	4	0.810375	-1.5205	0.00125789	2.33088	COPZ1_HUMAN Coatomer subunit zeta-1 OS=Homo sapiens GN=COPZ1 PE=1 SV=1
O43318	M3K7_HUMAN	-0.864369	-1.28088	-1.2188	-1.90535	-0.0239471	-0.399714	-0.427397	-0.411672	-0.53224	1.52196	2.2301	2.73298	0.384429	0.847649	5	3	3	6	1.54342	-0.78493	0.000101419	2.32835	M3K7_HUMAN Mitogen-activated protein kinase kinase kinase 7 OS=Homo sapiens GN=MAP3K7 PE=1 SV=1
Q2TAL8	QRIC1_HUMAN	-1.97257	-0.28818	-0.467531	-1.59427	-0.423412	-0.446709	-0.457628	-0.586974	-0.493382	1.61696	1.95607	2.24776	0.971911	1.10957	5	7	5	8	1.58045	-0.74785	1.11817e-05	2.3283	QRIC1_HUMAN Glutamine-rich protein 1 OS=Homo sapiens GN=QRICH1 PE=1 SV=1
P25786	PSA1_HUMAN	-0.144796	-0.935242	-0.00964943	-1.39774	-3.00192	-2.20691	-3.22906	-3.06968	-2.6761	2.77339	1.95111	2.03885	-2.40906	-2.00211	13	5	13	14	0.470435	-1.85234	0.0357588	2.32278	PSA1_HUMAN Proteasome subunit alpha type-1 OS=Homo sapiens GN=PSMA1 PE=1 SV=1
P41229	KDM5C_HUMAN	-1.17477	-0.884928	1.1954	-0.304921	-0.41886	-0.321635	-0.818147	-0.992693	-0.519093	2.45509	2.23851	2.25014	0.990739	1.32184	12	7	7	3	1.85126	-0.471072	5.31393e-05	2.32234	KDM5C_HUMAN Lysine-specific demethylase 5C OS=Homo sapiens GN=KDM5C PE=1 SV=2
O76003	GLRX3_HUMAN	-0.110568	-2.91192	-0.708329	-1.29864	-1.91261	-1.72722	-2.16203	-2.15089	-2.28904	-0.393282	2.82851	2.26415	-1.12351	-0.465324	12	11	7	9	0.622109	-1.6968	0.00606731	2.31891	GLRX3_HUMAN Glutaredoxin-3 OS=Homo sapiens GN=GLRX3 PE=1 SV=2
P28066	PSA5_HUMAN	-2.16084	-0.674396	-0.707875	-1.14993	-1.81299	-2.13912	-1.66834	-1.78571	-1.63455	2.08381	2.28291	1.97828	-1.22367	-1.16456	14	13	11	12	0.791356	-1.52597	0.0034271	2.31733	PSA5_HUMAN Proteasome subunit alpha type-5 OS=Homo sapiens GN=PSMA5 PE=1 SV=3
Q96P70	IPO9_HUMAN	0.260756	-2.36835	-1.32067	-2.16278	-1.83203	-1.83142	-2.04968	-1.997	-2.03731	1.4208	1.82526	1.8246	-1.09233	-0.939186	16	8	14	18	0.60783	-1.70428	0.00231274	2.31211	IPO9_HUMAN Importin-9 OS=Homo sapiens GN=IPO9 PE=1 SV=3
Q14258	TRI25_HUMAN	-1.78263	-0.344718	-1.01745	-3.25257	0.140104	-0.189887	0.397095	0.448334	0.14232	1.64697	2.57255	2.34012	0.918017	1.01341	20	18	21	21	1.69821	-0.606599	0.00259259	2.30481	TRI25_HUMAN E3 ubiquitin/ISG15 ligase TRIM25 OS=Homo sapiens GN=TRIM25 PE=1 SV=2
Q86V21	AACS_HUMAN	-2.50828	-0.473852	1.88112	-1.04043	-0.0326889	-0.753571	-0.58443	-0.754186	-0.533652	0.66934	2.03836	2.55625	1.6986	1.84332	10	6	7	12	1.76117	-0.53333	0.00155081	2.2945	AACS_HUMAN Acetoacetyl-CoA synthetase OS=Homo sapiens GN=AACS PE=1 SV=1
Q15185	TEBP_HUMAN	-0.254281	-2.35926	-1.97972	-2.92363	-0.419365	-0.900256	-1.04367	-1.61159	-1.42135	-1.34641	1.25992	1.57739	1.38431	1.42002	7	8	10	10	0.859045	-1.43479	0.00162041	2.29384	TEBP_HUMAN Prostaglandin E synthase 3 OS=Homo sapiens GN=PTGES3 PE=1 SV=1
Q9Y605	MOFA1_HUMAN	-0.134963	-1.49486	-0.00314742	-1.00119	-0.453994	-0.696711	-0.70766	-0.874527	-0.982734	2.66483	2.41121	0.0668074	1.22835	1.55027	2	1	3	3	1.58429	-0.705532	8.2716e-05	2.28983	MOFA1_HUMAN MORF4 family-associated protein 1 OS=Homo sapiens GN=MRFAP1 PE=1 SV=1
Q9P000	COMD9_HUMAN	-0.496512	-0.779034	-2.0069	-1.56584	0.00555259	-0.624858	-1.05841	-1.61849	-0.91467	0.803836	1.90231	1.7351	1.09647	0.861198	5	5	4	6	1.27978	-1.00657	1.60633e-05	2.28636	COMD9_HUMAN COMM domain-containing protein 9 OS=Homo sapiens GN=COMMD9 PE=1 SV=2
Q9H0A8	COMD4_HUMAN	-0.54615	-1.41115	-3.29745	0.0435136	0.132526	-0.0159492	-0.752623	-0.761455	-0.882973	1.2695	1.8063	2.87343	0.427969	0.86368	4	5	3	4	1.44817	-0.832412	0.0017155	2.28059	COMD4_HUMAN COMM domain-containing protein 4 OS=Homo sapiens GN=COMMD4 PE=1 SV=1
Q00653	NFKB2_HUMAN	-2.14777	-0.0305059	-1.40609	-1.04123	-0.0315229	-0.635057	-0.937807	-1.30059	-1.04356	0.309031	2.19875	2.04343	1.04187	1.0445	16	9	25	24	1.32752	-0.952681	9.00075e-05	2.2802	NFKB2_HUMAN Nuclear factor NF-kappa-B p100 subunit OS=Homo sapiens GN=NFKB2 PE=1 SV=4
Q9BZV1	UBXN6_HUMAN	-1.65445	0.27642	-0.896744	-0.86884	0.463752	-0.25665	-0.5321	-1.27404	-0.314022	1.44446	3.07883	1.43172	1.11792	1.48513	6	5	4	3	1.71161	-0.561852	0.000106892	2.27346	UBXN6_HUMAN UBX domain-containing protein 6 OS=Homo sapiens GN=UBXN6 PE=1 SV=1
Q7LBC6	KDM3B_HUMAN	-1.22353	-0.607252	-1.51896	-0.848829	-0.0327347	-0.476732	-0.732084	-1.19264	-0.589467	1.314	1.73342	2.56651	0.75856	0.964272	17	16	13	14	1.46735	-0.80247	8.99237e-06	2.26982	KDM3B_HUMAN Lysine-specific demethylase 3B OS=Homo sapiens GN=KDM3B PE=1 SV=2
O43264	ZW10_HUMAN	-1.31893	-1.00906	-1.59648	-1.54529	-0.615205	-0.985955	-1.16969	-1.61124	-1.58687	0.586856	1.59693	2.13566	0.434774	0.141051	14	14	8	7	0.979054	-1.27097	1.22774e-05	2.25002	ZW10_HUMAN Centromere/kinetochore protein zw10 homolog OS=Homo sapiens GN=ZW10 PE=1 SV=3
Q8TEX9	IPO4_HUMAN	-1.68735	-1.62898	-1.76147	-1.85817	-0.110131	-0.119563	-0.209441	-0.263274	0.232367	0.29666	1.34354	3.04797	0.966867	1.42744	23	27	16	16	1.41649	-0.82289	0.000965035	2.23938	IPO4_HUMAN Importin-4 OS=Homo sapiens GN=IPO4 PE=1 SV=2
O95373	IPO7_HUMAN	-0.332074	-2.09651	-2.41305	-2.98892	-0.681362	-0.827401	-0.929115	-1.18539	-1.13071	0.174789	1.15296	1.62207	0.506945	0.713243	24	27	20	24	0.834	-1.39828	0.000301271	2.23228	IPO7_HUMAN Importin-7 OS=Homo sapiens GN=IPO7 PE=1 SV=1
Q9BRT8	CBWD1_HUMAN	-2.1219	-1.29219	0.933864	-1.33514	-0.0994332	-0.128873	-0.124825	-0.38122	-0.125908	1.81998	2.69432	1.97242	0.881646	1.1835	3	7	4	1	1.71037	-0.519513	0.000498248	2.22988	CBWD1_HUMAN COBW domain-containing protein 1 OS=Homo sapiens GN=CBWD1 PE=2 SV=1
Q9Y263	PLAP_HUMAN	-0.677625	-1.29119	-1.73049	-2.16022	-0.737108	-0.924148	-0.794249	-1.21892	-1.02308	0.773596	1.31438	1.58663	0.583027	1.00723	24	17	22	25	1.05297	-1.173	1.90814e-06	2.22598	PLAP_HUMAN Phospholipase A-2-activating protein OS=Homo sapiens GN=PLAA PE=1 SV=2
O00743	PPP6_HUMAN	-4.11708	-0.555086	0.193334	1.19289	-0.0506932	-0.115098	0.472368	0.499692	0.480614	2.71054	3.38974	1.94779	0.711072	1.25055	11	7	7	12	2.00194	-0.222118	0.0148993	2.22406	PPP6_HUMAN Serine/threonine-protein phosphatase 6 catalytic subunit OS=Homo sapiens GN=PPP6C PE=1 SV=1
Q92805	GOGA1_HUMAN	-2.1961	-0.255099	0.528748	-0.238071	-0.0671552	-0.0868424	-0.13226	-1.30073	-0.527484	1.93609	2.78306	1.9198	0.878092	1.21561	17	10	12	8	1.74653	-0.474999	0.00026961	2.22153	GOGA1_HUMAN Golgin subfamily A member 1 OS=Homo sapiens GN=GOLGA1 PE=1 SV=3
Q6XZF7	DNMBP_HUMAN	-2.11585	-0.0482509	-1.02007	-0.446694	-0.255273	-0.713325	-0.0491477	-0.43197	-0.193468	1.48592	2.92493	1.87414	0.97902	0.882359	7	14	8	4	1.62927	-0.586005	0.000127945	2.21528	DNMBP_HUMAN Dynamin-binding protein OS=Homo sapiens GN=DNMBP PE=1 SV=1
Q68CZ6	HAUS3_HUMAN	-1.84711	-1.23095	0.171506	-0.430749	-0.455625	-0.232911	0.384104	0.0492988	-0.0862741	1.8931	1.92225	2.38234	1.09951	1.73485	6	7	2	3	1.80641	-0.408746	4.5492e-05	2.21515	HAUS3_HUMAN HAUS augmin-like complex subunit 3 OS=Homo sapiens GN=HAUS3 PE=1 SV=1
Q9UBI1	COMD3_HUMAN	-1.54999	-1.457	-0.680275	-0.874511	0.0637129	-0.432811	-1.36018	-1.06347	-1.15894	1.14958	2.6427	0.749457	0.817935	0.969511	3	1	3	1	1.26584	-0.945941	3.66444e-05	2.21178	COMD3_HUMAN COMM domain-containing protein 3 OS=Homo sapiens GN=COMMD3 PE=1 SV=1
O43617	TPPC3_HUMAN	-0.867525	-1.84231	-0.354271	-2.93683	-0.655969	-0.565437	-0.785491	-0.367033	-0.731538	-0.535325	0.96264	4.00832	0.810557	0.749423	5	2	4	5	1.19912	-1.01182	0.00602612	2.21095	TPPC3_HUMAN Trafficking protein particle complex subunit 3 OS=Homo sapiens GN=TRAPPC3 PE=1 SV=1
P23258	TBG1_HUMAN	-0.983226	-0.760912	-3.71551	-0.203846	0.102658	-0.311887	-0.254634	-0.512441	-0.288624	1.14798	1.43449	1.62419	1.1436	1.81738	3	6	4	1	1.43353	-0.769824	0.00137135	2.20335	TBG1_HUMAN Tubulin gamma-1 chain OS=Homo sapiens GN=TUBG1 PE=1 SV=2
Q99570	PI3R4_HUMAN	-1.21568	-1.61504	-1.04849	-1.59896	0.0281936	-0.246785	-0.369081	-0.655639	-0.247461	2.24366	1.68329	1.80472	0.48283	0.905741	12	13	16	9	1.42405	-0.774326	5.65788e-05	2.19837	PI3R4_HUMAN Phosphoinositide 3-kinase regulatory subunit 4 OS=Homo sapiens GN=PIK3R4 PE=1 SV=3
O95229	ZWINT_HUMAN	-1.445	0.0915796	-0.250872	-1.11932	0.543909	0.381884	1.02397	0.270178	0.97057	1.96964	3.29416	2.53777	1.60309	1.81393	4	3	5	2	2.24372	0.0518776	0.000372964	2.19184	ZWINT_HUMAN ZW10 interactor OS=Homo sapiens GN=ZWINT PE=1 SV=2
Q9UNI6	DUS12_HUMAN	-1.18019	-0.682078	-1.55279	-3.17551	-0.895221	-1.35472	-1.77406	-2.04842	-1.69262	0.232491	1.05282	2.2125	-0.340517	-0.210623	4	4	6	3	0.589335	-1.59507	0.000634501	2.1844	DUS12_HUMAN Dual specificity protein phosphatase 12 OS=Homo sapiens GN=DUSP12 PE=1 SV=1
O14618	CCS_HUMAN	0.24198	-0.671771	-0.249613	-1.95779	0.39955	0.745102	-1.37928	-1.35272	-1.73644	2.31418	2.19031	2.69927	-0.257993	0.638435	2	3	1	4	1.51684	-0.66233	0.00381425	2.17917	CCS_HUMAN Copper chaperone for superoxide dismutase OS=Homo sapiens GN=CCS PE=1 SV=1
Q9Y4C2	TCAF1_HUMAN	-0.0509888	-0.589725	-1.78595	-1.71717	-0.371636	-0.0662141	-0.543859	-0.338362	-0.513905	1.02349	2.41714	2.64915	0.535551	0.940793	10	2	8	7	1.51322	-0.664201	0.000251679	2.17742	TCAF1_HUMAN TRPM8 channel-associated factor 1 OS=Homo sapiens GN=TCAF1 PE=1 SV=3
Q9HBG6	IF122_HUMAN	-1.45418	-0.793363	-0.0567465	-0.0747735	-0.037998	-0.354443	-0.376449	-0.0239215	-0.317187	1.09275	3.15133	2.65816	0.769251	1.25683	10	7	7	3	1.78566	-0.387674	0.000153633	2.17334	IF122_HUMAN Intraflagellar transport protein 122 homolog OS=Homo sapiens GN=IFT122 PE=1 SV=2
P08397	HEM3_HUMAN	-1.10755	-0.597287	-1.73348	-1.09431	-1.74392	-1.65273	-1.29057	-1.43418	-1.77855	0.939571	0.731394	3.33702	-0.781457	-0.280127	4	6	4	5	0.78928	-1.3814	0.00178346	2.17068	HEM3_HUMAN Porphobilinogen deaminase OS=Homo sapiens GN=HMBS PE=1 SV=2
Q15021	CND1_HUMAN	-1.81493	-0.971395	-0.582754	-1.50244	0.283354	-0.212625	0.139153	-0.104959	-0.0140422	0.54628	1.62213	2.50112	1.68393	1.8375	42	39	33	29	1.63819	-0.531182	0.000184331	2.16938	CND1_HUMAN Condensin complex subunit 1 OS=Homo sapiens GN=NCAPD2 PE=1 SV=3
P43686	PRS6B_HUMAN	-0.781758	-2.48978	-2.81893	-2.9568	-1.01008	-1.16584	-1.9596	-2.14723	-1.87019	0.0614612	0.0812489	1.82589	-0.387024	-0.337771	23	14	18	16	0.248762	-1.91113	0.000542244	2.1599	PRS6B_HUMAN 26S protease regulatory subunit 6B OS=Homo sapiens GN=PSMC4 PE=1 SV=2
Q99081	HTF4_HUMAN	-0.90551	0.625998	-0.447795	-0.722898	0.58244	0.42342	-0.116855	-0.152517	0.165714	1.88556	2.16603	0.995924	2.62932	2.80879	8	2	6	5	2.09712	-0.0608891	3.99101e-05	2.15801	HTF4_HUMAN Transcription factor 12 OS=Homo sapiens GN=TCF12 PE=1 SV=1
P31350	RIR2_HUMAN	-0.955045	-1.7178	-0.599839	-1.93878	-1.60632	-1.48979	-2.01293	-1.63338	-2.01602	1.38359	2.32517	-0.0416664	-0.556192	-0.100727	12	7	11	8	0.602035	-1.55221	0.000420423	2.15425	RIR2_HUMAN Ribonucleoside-diphosphate reductase subunit M2 OS=Homo sapiens GN=RRM2 PE=1 SV=1
Q8NEY1	NAV1_HUMAN	-1.03624	-0.383624	-0.642991	-0.584311	0.0378185	0.0440544	-0.381648	-0.899823	-0.0646038	1.86326	1.86525	1.94563	1.07837	1.84403	16	17	17	12	1.71931	-0.434596	3.2582e-07	2.15391	NAV1_HUMAN Neuron navigator 1 OS=Homo sapiens GN=NAV1 PE=1 SV=2
Q96JJ3	ELMO2_HUMAN	-0.935348	-1.34904	-1.29098	-1.17756	-0.397838	-0.744422	-1.29416	-1.38664	-0.654259	0.75016	1.61884	1.85587	0.612064	0.802768	8	6	10	6	1.12794	-1.02558	1.38405e-06	2.15352	ELMO2_HUMAN Engulfment and cell motility protein 2 OS=Homo sapiens GN=ELMO2 PE=1 SV=2
Q8IX04	UEVLD_HUMAN	-0.789313	-1.31849	0.000133682	-1.15533	-0.470778	-0.811793	-2.04103	-1.62537	-2.26886	1.17711	1.79103	1.40634	0.270085	0.262185	3	3	2	2	0.98135	-1.16454	0.000175942	2.14589	UEVLD_HUMAN Ubiquitin-conjugating enzyme E2 variant 3 OS=Homo sapiens GN=UEVLD PE=1 SV=2
Q9Y4R8	TELO2_HUMAN	-1.10116	-0.820471	-0.966397	-1.19857	0.175993	0.130884	-0.0334701	-0.433209	0.124319	1.92186	2.16461	1.30092	1.42473	1.59393	18	9	10	13	1.68121	-0.458009	7.14414e-06	2.13922	TELO2_HUMAN Telomere length regulation protein TEL2 homolog OS=Homo sapiens GN=TELO2 PE=1 SV=2
P28340	DPOD1_HUMAN	-1.58615	-0.80602	-0.381716	-0.331564	0.432556	0.0293458	0.0623922	-0.117519	-0.250386	1.24224	2.8448	1.80868	1.56398	1.59541	36	28	28	25	1.81102	-0.327674	3.09778e-05	2.1387	DPOD1_HUMAN DNA polymerase delta catalytic subunit OS=Homo sapiens GN=POLD1 PE=1 SV=2
P32019	I5P2_HUMAN	-1.5113	-2.431	0.173982	-1.13317	-0.607798	-0.95323	-0.684987	-0.465273	-0.488067	1.47564	2.43516	1.01036	0.68399	0.549697	1	1	1	1	1.23097	-0.900093	0.000262759	2.13106	I5P2_HUMAN Type II inositol 1,4,5-trisphosphate 5-phosphatase OS=Homo sapiens GN=INPP5B PE=1 SV=4
Q15208	STK38_HUMAN	-1.6013	-1.84519	1.07779	-0.159318	0.063457	-0.516741	-0.994138	-0.612118	-0.457498	0.801018	1.74505	2.02927	1.59558	1.68115	6	6	4	2	1.57041	-0.560562	0.000311329	2.13098	STK38_HUMAN Serine/threonine-protein kinase 38 OS=Homo sapiens GN=STK38 PE=1 SV=1
P30260	CDC27_HUMAN	-1.11348	-0.343092	-1.45878	-2.55489	0.4597	0.397503	-0.617067	-0.934376	-0.682033	1.25014	1.28323	2.14964	1.02382	1.14182	13	10	13	9	1.36973	-0.760724	0.000456353	2.13045	CDC27_HUMAN Cell division cycle protein 27 homolog OS=Homo sapiens GN=CDC27 PE=1 SV=2
Q13671	RIN1_HUMAN	-2.29487	-1.49803	-1.44929	1.08755	-0.066825	-0.0425398	0.0128714	-0.119199	-0.0333411	2.98116	1.85233	1.49282	0.58425	1.29406	9	8	7	3	1.64093	-0.489297	0.00227754	2.13022	RIN1_HUMAN Ras and Rab interactor 1 OS=Homo sapiens GN=RIN1 PE=1 SV=4
Q9NPI6	DCP1A_HUMAN	-2.22536	-1.39397	-0.283278	-1.81731	-0.301796	-0.348296	-0.419847	-0.930715	-0.404602	0.675237	1.21913	2.96314	0.558212	0.71133	2	5	11	10	1.22541	-0.902798	0.000652166	2.12821	DCP1A_HUMAN mRNA-decapping enzyme 1A OS=Homo sapiens GN=DCP1A PE=1 SV=2
Q15020	SART3_HUMAN	-1.82395	-0.708847	-0.143036	-2.12909	0.53137	0.279141	0.229104	0.301229	0.542357	1.28284	2.25279	2.29304	1.53039	1.6565	23	16	25	27	1.80312	-0.324637	0.000873116	2.12775	SART3_HUMAN Squamous cell carcinoma antigen recognized by T-cells 3 OS=Homo sapiens GN=SART3 PE=1 SV=1
Q8IX03	KIBRA_HUMAN	-2.25312	-0.100249	1.10659	0.543327	-0.281709	-0.614536	-0.388357	-0.616045	-0.504206	1.94376	2.45284	2.2542	0.822928	1.42817	10	5	5	3	1.78038	-0.345367	0.000697724	2.12575	KIBRA_HUMAN Protein KIBRA OS=Homo sapiens GN=WWC1 PE=1 SV=1
Q15398	DLGP5_HUMAN	-0.869626	-1.45019	1.07831	-1.55973	-0.853645	-0.903463	-1.31929	-1.55828	-1.54495	1.05078	1.82553	1.29208	0.642248	0.772726	14	3	8	8	1.11667	-0.997874	0.000236602	2.11455	DLGP5_HUMAN Disks large-associated protein 5 OS=Homo sapiens GN=DLGAP5 PE=1 SV=2
Q49AR2	CE022_HUMAN	-0.685032	-1.68228	0.359608	-2.67153	-1.24103	-0.383649	-0.738209	-0.420342	-0.901271	2.72382	2.24557	0.747964	-0.111515	0.271753	4	5	2	1	1.17552	-0.929304	0.00281893	2.10482	CE022_HUMAN UPF0489 protein C5orf22 OS=Homo sapiens GN=C5orf22 PE=1 SV=2
P54277	PMS1_HUMAN	-0.880721	-0.450565	-0.395182	-1.48143	0.564667	0.452304	-0.962638	0.070699	0.26192	0.974955	1.79566	2.61759	1.21372	2.28991	2	7	2	1	1.77837	-0.313438	0.000173986	2.09181	PMS1_HUMAN PMS1 protein homolog 1 OS=Homo sapiens GN=PMS1 PE=1 SV=1
Q9NVP2	ASF1B_HUMAN	-0.035663	-0.312952	0.181714	-1.79948	0.0548392	0.206843	-0.604287	-0.567856	-0.725678	1.90045	2.87486	0.598693	1.485	1.5906	2	3	2	3	1.68992	-0.40028	0.000172566	2.0902	ASF1B_HUMAN Histone chaperone ASF1B OS=Homo sapiens GN=ASF1B PE=1 SV=1
Q9GZT9	EGLN1_HUMAN	-1.28106	-1.05075	-0.842149	0.933803	-0.270154	-0.0699699	-0.420976	-0.795106	-0.520122	1.72528	2.1553	2.20163	0.88036	1.08754	4	2	5	6	1.61002	-0.479609	7.54172e-05	2.08963	EGLN1_HUMAN Egl nine homolog 1 OS=Homo sapiens GN=EGLN1 PE=1 SV=1
Q86YR5	GPSM1_HUMAN	-1.23077	-0.703897	0.91295	-1.11236	-0.154864	-0.327039	-1.01329	-1.14225	-0.997631	0.993557	1.82694	1.62309	1.13765	1.64932	3	5	2	3	1.44611	-0.641016	4.52444e-05	2.08713	GPSM1_HUMAN G-protein-signaling modulator 1 OS=Homo sapiens GN=GPSM1 PE=1 SV=2
P86790	CCZ1B_HUMAN	-1.39104	-1.27126	-0.367644	0.0481439	-0.299065	-0.729309	-0.378648	-0.236691	-0.253575	2.23415	2.4054	1.4201	0.753352	0.906985	6	9	6	4	1.544	-0.542121	3.79147e-05	2.08612	CCZ1B_HUMAN Vacuolar fusion protein CCZ1 homolog B OS=Homo sapiens GN=CCZ1B PE=1 SV=1
P11172	UMPS_HUMAN	-1.65505	-1.09465	-1.18836	-2.4347	0.206322	-0.833818	-1.44283	-1.56422	-1.31165	-1.52942	0.190364	2.61562	1.46377	1.34598	21	13	17	18	0.817264	-1.25766	0.00470516	2.07493	UMPS_HUMAN Uridine 5'-monophosphate synthase OS=Homo sapiens GN=UMPS PE=1 SV=1
Q13501	SQSTM_HUMAN	-3.44846	-0.941665	-3.24757	0.263674	0.776303	0.216439	0.568083	0.403346	0.221958	2.16375	0.874786	1.18628	1.69811	1.56462	15	16	15	16	1.49751	-0.576432	0.0188957	2.07394	SQSTM_HUMAN Sequestosome-1 OS=Homo sapiens GN=SQSTM1 PE=1 SV=1
O95361	TRI16_HUMAN	-1.67745	-1.65673	-0.443729	-0.972522	-1.3103	-1.57275	-1.13605	-1.40757	-1.22401	0.527943	1.31381	1.32142	0.159128	0.712422	6	5	12	13	0.806945	-1.26679	1.79757e-06	2.07374	TRI16_HUMAN Tripartite motif-containing protein 16 OS=Homo sapiens GN=TRIM16 PE=1 SV=3
Q8TBA6	GOGA5_HUMAN	-1.62898	-1.22948	0.120089	-1.39519	-0.324155	-0.044749	-2.04658	-3.77401	-0.716481	0.838572	-0.0377726	1.43331	-0.142852	2.12859	2	1	2	1	0.843968	-1.22661	0.0065994	2.07058	GOGA5_HUMAN Golgin subfamily A member 5 OS=Homo sapiens GN=GOLGA5 PE=1 SV=3
Q9Y6B7	AP4B1_HUMAN	-0.293316	-1.22172	-1.73874	-0.63756	-0.155012	-0.433401	0.201907	0.486663	0.5831	1.35178	2.52383	1.6694	1.43568	1.58819	3	4	3	1	1.71378	-0.356453	0.000148951	2.07023	AP4B1_HUMAN AP-4 complex subunit beta-1 OS=Homo sapiens GN=AP4B1 PE=1 SV=2
Q96BD8	SKA1_HUMAN	-2.6103	-0.535683	1.11234	-2.0267	-0.149618	0.282671	-1.07784	-1.06319	-1.26932	2.43582	1.99804	0.967644	0.342807	0.516854	1	3	1	3	1.25223	-0.815294	0.00482936	2.06753	SKA1_HUMAN Spindle and kinetochore-associated protein 1 OS=Homo sapiens GN=SKA1 PE=1 SV=1
P30154	2AAB_HUMAN	-1.02635	-1.14106	-1.23882	-2.00902	-0.19067	-0.0813195	-0.239821	-0.466383	-0.0652586	1.1677	1.42904	1.66152	1.09329	1.38051	8	6	6	7	1.34641	-0.717632	2.68403e-05	2.06404	2AAB_HUMAN Serine/threonine-protein phosphatase 2A 65 kDa regulatory subunit A beta isoform OS=Homo sapiens GN=PPP2R1B PE=1 SV=3
Q6P996	PDXD1_HUMAN	-1.04945	-1.53928	-0.882634	-2.31255	-0.615342	-1.07449	-1.08628	-1.08267	-1.11389	-0.167443	1.68546	1.70607	0.369535	0.714359	12	15	15	12	0.861597	-1.19518	6.53766e-05	2.05677	PDXD1_HUMAN Pyridoxal-dependent decarboxylase domain-containing protein 1 OS=Homo sapiens GN=PDXDC1 PE=1 SV=2
P08590	MYL3_HUMAN	-2.7678	-0.807314	-3.50235	-4.49029	-0.0512058	0.285366	-0.478267	-0.0757187	0.413857	1.01788	0.421625	1.6263	0.306519	0.528402	1	2	1	1	0.780146	-1.27486	0.0322635	2.055	MYL3_HUMAN Myosin light chain 3 OS=Homo sapiens GN=MYL3 PE=1 SV=3
Q9UBB6	NCDN_HUMAN	0.0489156	-2.37072	-0.614183	-1.23191	-0.327268	-0.262121	-1.20317	-1.98122	-1.24793	0.671552	1.94229	2.33784	-0.204512	0.403962	7	4	3	2	1.03022	-1.02107	0.00157076	2.05129	NCDN_HUMAN Neurochondrin OS=Homo sapiens GN=NCDN PE=1 SV=1
Q14161	GIT2_HUMAN	-1.9415	-0.883406	-0.276888	-1.18133	-0.124951	-0.613879	0.284526	-0.127769	-0.436161	1.36491	2.32101	1.92211	0.545594	1.116	7	3	3	4	1.45392	-0.58904	0.000157154	2.04296	GIT2_HUMAN ARF GTPase-activating protein GIT2 OS=Homo sapiens GN=GIT2 PE=1 SV=2
Q3B7T1	EDRF1_HUMAN	-0.444296	-1.56531	0.356367	-1.32168	-0.355916	-0.613915	-0.527654	-1.30206	-0.696364	1.17806	1.13526	1.93687	1.20904	1.15733	3	7	4	1	1.32331	-0.718981	1.48108e-05	2.0423	EDRF1_HUMAN Erythroid differentiation-related factor 1 OS=Homo sapiens GN=EDRF1 PE=1 SV=1
P17980	PRS6A_HUMAN	-1.71794	-2.79501	-1.53605	-2.19284	-0.804704	-1.13269	-1.73019	-1.97196	-1.73295	-0.441333	0.039597	1.09854	0.392637	0.42115	37	24	26	28	0.302119	-1.73493	3.52039e-05	2.03705	PRS6A_HUMAN 26S protease regulatory subunit 6A OS=Homo sapiens GN=PSMC3 PE=1 SV=3
Q99622	C10_HUMAN	-1.42675	0.240281	-2.20109	-0.187252	0.403217	-0.202482	-0.386251	-0.401723	-0.167297	-0.0508222	1.49281	2.89698	1.27083	2.16366	4	5	2	3	1.55469	-0.481039	0.00194287	2.03573	C10_HUMAN Protein C10 OS=Homo sapiens GN=C12orf57 PE=1 SV=1
Q8WUX9	CHMP7_HUMAN	-1.6773	-0.708839	0.0764431	-1.60279	0.555515	0.651491	0.38328	0.190431	0.43632	1.10956	1.93944	2.19186	2.01798	1.97394	4	6	4	2	1.84655	-0.188383	0.000562724	2.03494	CHMP7_HUMAN Charged multivesicular body protein 7 OS=Homo sapiens GN=CHMP7 PE=1 SV=1
Q9NVG8	TBC13_HUMAN	0.0940202	-1.74139	-1.28311	-2.14287	-0.851524	-1.1295	-2.5359	-2.11871	-2.0758	-0.436742	1.74511	1.50733	-0.0857168	-0.217991	5	7	7	2	0.502398	-1.53164	0.00159092	2.03404	TBC13_HUMAN TBC1 domain family member 13 OS=Homo sapiens GN=TBC1D13 PE=1 SV=3
Q8WY36	BBX_HUMAN	-1.47043	-0.0850814	0.267716	-1.85617	1.35772	0.944572	0.653722	0.495252	0.894365	1.87705	2.12725	2.47762	2.19721	2.1531	7	6	7	6	2.16645	0.133518	0.00173283	2.03293	BBX_HUMAN HMG box transcription factor BBX OS=Homo sapiens GN=BBX PE=1 SV=1
Q16401	PSMD5_HUMAN	0.355275	-1.64986	-0.792369	-2.50997	-0.98814	-1.1228	-1.91622	-1.78093	-1.99854	0.352936	0.766453	1.97811	0.080489	0.0955281	17	12	14	13	0.654703	-1.37817	0.000873768	2.03288	PSMD5_HUMAN 26S proteasome non-ATPase regulatory subunit 5 OS=Homo sapiens GN=PSMD5 PE=1 SV=3
Q96RT8	GCP5_HUMAN	-1.47446	-0.898494	-0.75757	-0.642367	-0.489861	-0.728364	-0.0537386	-1.36518	-0.515919	0.604832	1.66173	2.80391	0.780298	0.45648	3	4	2	1	1.26145	-0.769551	0.000151901	2.031	GCP5_HUMAN Gamma-tubulin complex component 5 OS=Homo sapiens GN=TUBGCP5 PE=1 SV=1
Q9BXW9	FACD2_HUMAN	-0.924087	-0.895717	-1.00816	-1.4443	0.22567	0.119951	0.0370111	-0.118421	0.186788	1.86389	2.69948	0.997868	1.20316	1.26311	14	13	15	12	1.6055	-0.424586	0.000126095	2.03009	FACD2_HUMAN Fanconi anemia group D2 protein OS=Homo sapiens GN=FANCD2 PE=1 SV=2
Q14181	DPOA2_HUMAN	-1.81775	-0.0242882	0.101889	-1.17265	0.181196	0.183967	-0.0634178	-0.677352	-0.247142	0.880583	2.00697	2.70192	1.06765	1.51829	7	8	11	9	1.63508	-0.392838	0.000257238	2.02792	DPOA2_HUMAN DNA polymerase alpha subunit B OS=Homo sapiens GN=POLA2 PE=1 SV=2
Q14C86	GAPD1_HUMAN	0.00288182	-1.41796	-0.477235	-2.22352	-1.2855	-1.38199	-1.65188	-1.83821	-1.83162	0.627018	1.1548	2.36088	-0.486352	-0.249955	23	15	26	17	0.681278	-1.345	0.00135173	2.02628	GAPD1_HUMAN GTPase-activating protein and VPS9 domain-containing protein 1 OS=Homo sapiens GN=GAPVD1 PE=1 SV=2
P60842	IF4A1_HUMAN	-2.55869	-2.0719	-2.24722	-1.60179	-0.146609	-0.368396	-0.502652	-0.780557	-0.600662	-0.572386	1.13582	1.90709	0.583451	1.01241	22	19	19	19	0.813277	-1.20872	0.00185526	2.022	IF4A1_HUMAN Eukaryotic initiation factor 4A-I OS=Homo sapiens GN=EIF4A1 PE=1 SV=1
Q96R06	SPAG5_HUMAN	-1.92788	-0.596424	-0.977259	-1.76775	-0.585481	-0.565606	-0.325701	-0.355197	-0.490263	0.821839	1.14093	1.83465	0.919191	1.16838	18	13	12	8	1.177	-0.843507	2.20472e-05	2.02051	SPAG5_HUMAN Sperm-associated antigen 5 OS=Homo sapiens GN=SPAG5 PE=1 SV=2
Q15750	TAB1_HUMAN	-1.31492	-1.07369	-0.182071	0.161302	-0.592332	-0.503307	-0.333805	-0.586976	0.0442105	2.72874	2.64398	2.08501	-0.161904	0.368206	7	5	7	7	1.5328	-0.486843	0.0013103	2.01965	TAB1_HUMAN TGF-beta-activated kinase 1 and MAP3K7-binding protein 1 OS=Homo sapiens GN=TAB1 PE=1 SV=1
Q6PEV8	F199X_HUMAN	-0.35116	-0.37041	-1.42191	0.260413	0.270396	0.222071	0.349463	-0.0743355	0.164298	1.72796	2.46605	1.95014	1.64331	1.74905	3	3	1	1	1.9073	-0.105686	1.00473e-05	2.01299	F199X_HUMAN Protein FAM199X OS=Homo sapiens GN=FAM199X PE=1 SV=1
O43156	TTI1_HUMAN	-0.891582	-0.285701	-0.162443	-1.82698	-0.0420816	-0.550011	-1.25476	-1.50818	-1.09784	0.859766	1.59437	1.69139	0.811129	0.87121	7	5	6	2	1.16557	-0.846621	3.85327e-05	2.01219	TTI1_HUMAN TELO2-interacting protein 1 homolog OS=Homo sapiens GN=TTI1 PE=1 SV=3
Q9UK32	KS6A6_HUMAN	-1.46866	-2.54226	-0.0676249	-0.0314252	1.48096	0.880014	-0.202941	-0.165211	0.264633	1.72826	3.11701	1.68539	1.23136	1.25325	1	1	1	2	1.80305	-0.205834	0.0055947	2.00889	KS6A6_HUMAN Ribosomal protein S6 kinase alpha-6 OS=Homo sapiens GN=RPS6KA6 PE=1 SV=1
P42771	CDN2A_HUMAN	-1.16391	-0.242706	0.0446395	-1.4617	0.421447	0.268023	-0.822209	-0.539523	-0.306345	1.04887	1.73461	1.8195	1.16988	2.15704	8	4	4	4	1.58598	-0.422476	4.98433e-05	2.00845	CDN2A_HUMAN Cyclin-dependent kinase inhibitor 2A OS=Homo sapiens GN=CDKN2A PE=1 SV=2
Q9Y5B0	CTDP1_HUMAN	-0.819517	-0.428045	-0.802893	-1.03878	0.0465292	-0.101753	-0.61571	-1.03745	-0.426559	1.05131	1.35321	1.85342	1.46257	1.40127	7	7	5	6	1.42435	-0.580464	3.29118e-07	2.00482	CTDP1_HUMAN RNA polymerase II subunit A C-terminal domain phosphatase OS=Homo sapiens GN=CTDP1 PE=1 SV=3
Q8WXG6	MADD_HUMAN	-1.30492	-1.01448	-0.487713	-0.488724	0.150557	-0.076705	-0.383249	-0.662096	-0.488565	0.859043	1.54142	2.16424	1.23748	1.56841	11	10	14	7	1.47412	-0.528432	4.21947e-06	2.00255	MADD_HUMAN MAP kinase-activating death domain protein OS=Homo sapiens GN=MADD PE=1 SV=2
Q96CS2	HAUS1_HUMAN	-1.3975	0.0160534	-0.0346554	-0.287155	0.0537323	-0.120973	0.215411	0.100522	0.538102	1.73393	1.83734	1.85249	1.84146	2.18871	3	7	1	1	1.89079	-0.101829	4.04417e-06	1.99261	HAUS1_HUMAN HAUS augmin-like complex subunit 1 OS=Homo sapiens GN=HAUS1 PE=1 SV=1
Q9BZD4	NUF2_HUMAN	-0.771052	-0.412818	0.702999	-0.697141	-0.257473	-0.379026	-0.21719	-0.810497	-0.565218	1.74369	2.248	0.929779	1.46421	1.67854	12	7	10	10	1.61284	-0.378602	5.7931e-06	1.99144	NUF2_HUMAN Kinetochore protein Nuf2 OS=Homo sapiens GN=NUF2 PE=1 SV=2
P68402	PA1B2_HUMAN	-1.98703	-1.5317	-2.71165	-2.06862	-1.89838	-2.54994	-1.86219	-1.93976	-1.57587	0.877159	0.661794	0.558474	-0.892731	-1.34101	2	3	3	1	-0.0272632	-2.01391	0.000178828	1.98664	PA1B2_HUMAN Platelet-activating factor acetylhydrolase IB subunit beta OS=Homo sapiens GN=PAFAH1B2 PE=1 SV=1
Q9Y3I1	FBX7_HUMAN	-1.92163	-0.615361	1.37574	-0.28707	0.805843	-0.523019	-0.288263	-0.315661	-0.519882	1.1343	2.28547	1.403	1.97796	1.85404	4	7	5	4	1.73095	-0.254367	0.000796875	1.98532	FBX7_HUMAN F-box only protein 7 OS=Homo sapiens GN=FBXO7 PE=1 SV=1
Q9P2E3	ZNFX1_HUMAN	-1.35573	-1.25677	-0.211432	-0.787613	0.495752	0.20278	0.0926631	0.202718	-0.0907551	1.35433	1.66174	1.94437	1.63505	1.82522	7	11	6	2	1.68414	-0.300932	3.86171e-05	1.98507	ZNFX1_HUMAN NFX1-type zinc finger-containing protein 1 OS=Homo sapiens GN=ZNFX1 PE=2 SV=2
Q2KHR3	QSER1_HUMAN	-1.27647	-0.666346	-0.514037	0.229569	0.0604109	-0.0388491	0.327662	-0.123221	-0.0624188	1.68767	2.42529	1.92408	1.23388	1.48936	15	16	14	11	1.75205	-0.2293	1.00146e-05	1.98135	QSER1_HUMAN Glutamine and serine-rich protein 1 OS=Homo sapiens GN=QSER1 PE=1 SV=3
Q6P3X3	TTC27_HUMAN	-1.27892	-1.06278	0.304111	-0.945591	-0.0284386	-0.192969	-0.412337	-0.964571	-0.491747	2.36256	2.13506	1.58679	0.458965	0.544446	10	10	11	7	1.41757	-0.563694	0.000188327	1.98126	TTC27_HUMAN Tetratricopeptide repeat protein 27 OS=Homo sapiens GN=TTC27 PE=1 SV=1
P09913	IFIT2_HUMAN	-1.49104	-0.782532	-0.459504	-0.497925	0.133008	-0.343586	-1.11946	-1.36972	-0.289437	0.687121	0.192673	2.90724	1.66735	0.996185	6	8	5	3	1.29011	-0.691133	0.000485303	1.98125	IFIT2_HUMAN Interferon-induced protein with tetratricopeptide repeats 2 OS=Homo sapiens GN=IFIT2 PE=1 SV=1
Q9UP83	COG5_HUMAN	-1.10536	-0.466269	-2.67786	-0.970517	-0.605839	-0.729288	-0.284283	-0.711691	-0.542226	0.42065	0.965623	1.89442	0.96978	1.14755	11	11	9	6	1.0796	-0.899259	0.000160398	1.97886	COG5_HUMAN Conserved oligomeric Golgi complex subunit 5 OS=Homo sapiens GN=COG5 PE=1 SV=3
Q16644	MAPK3_HUMAN	-0.173658	-1.38426	-0.629691	-1.93528	-1.73393	-1.85808	-1.69529	-1.77569	-1.69838	0.278568	1.4739	1.26511	-0.410632	0.12218	4	3	3	7	0.545825	-1.43158	0.000218603	1.97741	MAPK3_HUMAN MAP kinase-activated protein kinase 3 OS=Homo sapiens GN=MAPKAPK3 PE=1 SV=1
Q00613	HSF1_HUMAN	-1.86285	-0.386729	-2.54755	-0.859439	0.100219	-0.260758	0.38547	-0.249027	0.162842	0.941178	1.01146	1.41678	1.76808	1.67932	7	1	4	3	1.36336	-0.613091	0.00113105	1.97645	HSF1_HUMAN Heat shock factor protein 1 OS=Homo sapiens GN=HSF1 PE=1 SV=1
Q6NXR4	TTI2_HUMAN	-1.47667	-1.57438	-0.555392	-0.877774	0.79579	0.157512	-1.19641	-1.16384	-1.16318	0.60186	2.11789	1.11994	0.861139	1.2537	4	5	1	3	1.1909	-0.783816	0.000381977	1.97472	TTI2_HUMAN TELO2-interacting protein 2 OS=Homo sapiens GN=TTI2 PE=1 SV=1
P60484	PTEN_HUMAN	-2.66039	-1.8491	-0.087096	1.51166	0.370847	0.0675691	-0.438912	-0.743312	-0.543922	1.51097	2.86299	-0.492744	1.42853	2.11628	4	2	5	4	1.48521	-0.485849	0.0138187	1.97106	PTEN_HUMAN Phosphatidylinositol 3,4,5-trisphosphate 3-phosphatase and dual-specificity protein phosphatase PTEN OS=Homo sapiens GN=PTEN PE=1 SV=1
P38606	VATA_HUMAN	-2.30194	-0.476809	0.0574	0.330948	0.212745	0.00154936	-0.211656	-0.336327	0.0201366	2.08041	2.62032	1.0983	1.01472	1.53382	32	24	21	23	1.66951	-0.300439	0.000545665	1.96995	VATA_HUMAN V-type proton ATPase catalytic subunit A OS=Homo sapiens GN=ATP6V1A PE=1 SV=2
Q9Y5N6	ORC6_HUMAN	0.205324	-0.867962	-0.53535	0.799581	1.25874	1.12541	-0.292578	-0.188768	-0.0849165	2.26075	1.99214	1.02315	2.55448	2.75947	4	4	3	2	2.118	0.15772	0.000401569	1.96028	ORC6_HUMAN Origin recognition complex subunit 6 OS=Homo sapiens GN=ORC6 PE=1 SV=1
Q9H269	VPS16_HUMAN	-1.39915	-0.478548	-2.73256	-0.738477	0.0617295	0.14873	-0.606632	-0.963676	-0.577687	1.33438	1.80662	1.18101	0.294113	1.13149	8	4	4	10	1.14952	-0.809586	0.000667811	1.95911	VPS16_HUMAN Vacuolar protein sorting-associated protein 16 homolog OS=Homo sapiens GN=VPS16 PE=1 SV=2
Q2M1P5	KIF7_HUMAN	-2.46011	-1.33905	0.17304	0.532731	-0.0841316	-0.63703	-1.91566	-2.08855	-2.10183	0.390157	1.36553	1.11983	1.01703	0.388547	3	3	1	1	0.85622	-1.10229	0.00310215	1.95851	KIF7_HUMAN Kinesin-like protein KIF7 OS=Homo sapiens GN=KIF7 PE=1 SV=2
Q86XI2	CNDG2_HUMAN	-1.40253	-0.348989	-2.24464	-1.87423	0.878988	0.543253	0.522868	0.375406	0.788211	1.50429	2.111	1.69952	1.40532	1.52506	17	14	11	17	1.64904	-0.306851	0.00457448	1.95589	CNDG2_HUMAN Condensin-2 complex subunit G2 OS=Homo sapiens GN=NCAPG2 PE=1 SV=1
P07741	APT_HUMAN	-2.26227	-0.162175	-1.84532	-2.27611	-0.347342	-0.679427	-1.33551	-1.34471	-1.39599	-0.368031	-0.095159	2.55765	0.445026	0.76614	6	8	6	7	0.661125	-1.29432	0.00240123	1.95544	APT_HUMAN Adenine phosphoribosyltransferase OS=Homo sapiens GN=APRT PE=1 SV=2
Q14790	CASP8_HUMAN	-1.80467	-0.933917	0.765281	-1.32993	-0.289507	-0.888862	-0.98212	-0.923757	-0.347068	0.291519	1.47829	1.54993	1.32847	1.38756	5	11	7	7	1.20715	-0.748284	0.000201444	1.95544	CASP8_HUMAN Caspase-8 OS=Homo sapiens GN=CASP8 PE=1 SV=1
P09914	IFIT1_HUMAN	-2.93081	-1.83761	-0.350156	-2.22622	0.0195683	-0.247971	0.13521	-0.0970309	0.204098	0.520923	0.384317	2.12785	1.62715	1.03659	9	9	7	8	1.13937	-0.814548	0.00614306	1.95391	IFIT1_HUMAN Interferon-induced protein with tetratricopeptide repeats 1 OS=Homo sapiens GN=IFIT1 PE=1 SV=2
Q9H6D7	HAUS4_HUMAN	-2.41168	-0.360119	1.70906	-0.22995	-0.000752934	-0.388557	-0.683514	-0.301237	-0.173718	2.26617	2.00515	1.41287	1.31435	1.18508	4	5	4	3	1.63672	-0.315607	0.00209955	1.95233	HAUS4_HUMAN HAUS augmin-like complex subunit 4 OS=Homo sapiens GN=HAUS4 PE=1 SV=1
Q6P2E9	EDC4_HUMAN	-2.05815	-0.467604	-0.758268	-0.111627	-0.0376945	-0.125822	0.119423	0.000249116	0.167233	1.4513	2.09384	1.52639	1.34779	1.52435	36	21	20	25	1.58873	-0.363584	7.4789e-05	1.95232	EDC4_HUMAN Enhancer of mRNA-decapping protein 4 OS=Homo sapiens GN=EDC4 PE=1 SV=1
Q9H900	ZWILC_HUMAN	0.608518	-1.11477	-1.27572	-2.90598	-1.5876	-1.58192	-1.99898	-1.99751	-1.98735	0.107717	1.38094	1.26499	-0.402437	-0.283996	5	5	6	3	0.413443	-1.53792	0.00260984	1.95136	ZWILC_HUMAN Protein zwilch homolog OS=Homo sapiens GN=ZWILCH PE=1 SV=2
Q9NWK9	BCD1_HUMAN	-0.958178	-1.42945	-0.894485	-0.803096	-0.450557	-0.406096	0.0193667	-1.05543	-0.698681	1.74217	1.46747	0.67299	0.876474	1.28379	4	3	1	2	1.20858	-0.741845	2.89136e-06	1.95042	BCD1_HUMAN Box C/D snoRNA protein 1 OS=Homo sapiens GN=ZNHIT6 PE=1 SV=1
Q53EZ4	CEP55_HUMAN	-0.677419	-0.822535	1.70003	-1.23148	0.0848377	-0.115738	-0.0150299	-0.681398	-0.173687	2.14351	2.26194	1.26146	1.52643	1.47116	17	6	14	7	1.7329	-0.214713	0.000454558	1.94761	CEP55_HUMAN Centrosomal protein of 55 kDa OS=Homo sapiens GN=CEP55 PE=1 SV=3
Q9UBP9	GULP1_HUMAN	-2.27694	-0.627478	-0.0817053	0.102623	0.0866681	-0.461158	-0.61079	-0.81884	-0.520652	1.23756	2.14039	0.288799	1.43418	1.73468	5	3	2	2	1.36712	-0.578696	0.000353851	1.94582	GULP1_HUMAN PTB domain-containing engulfment adapter protein 1 OS=Homo sapiens GN=GULP1 PE=1 SV=1
Q9H788	SH24A_HUMAN	0.497245	-1.1855	-2.84499	-2.96801	-1.01858	-0.961074	-1.04191	-1.35864	-1.01668	1.48697	0.268069	1.20024	-0.283897	0.43594	6	6	7	8	0.621466	-1.32201	0.00320584	1.94348	SH24A_HUMAN SH2 domain-containing protein 4A OS=Homo sapiens GN=SH2D4A PE=1 SV=1
Q9BV44	THUM3_HUMAN	-2.15582	-0.944722	-0.788927	-1.37153	-0.498756	-0.819867	-1.75477	-1.84883	-1.48888	0.241884	1.35029	0.936248	0.397987	0.289416	4	8	4	4	0.643166	-1.2969	3.09071e-05	1.94007	THUM3_HUMAN THUMP domain-containing protein 3 OS=Homo sapiens GN=THUMPD3 PE=1 SV=1
Q15643	TRIPB_HUMAN	-1.32342	-0.108595	0.307992	0.267205	-0.165266	-0.536003	-0.748522	-0.927426	-0.680652	1.01448	0.872497	2.46216	1.44766	1.72273	30	20	22	16	1.5039	-0.434966	6.25114e-05	1.93887	TRIPB_HUMAN Thyroid receptor-interacting protein 11 OS=Homo sapiens GN=TRIP11 PE=1 SV=3
Q96AY4	TTC28_HUMAN	-1.31882	0.412338	-0.136386	-1.06545	0.137275	0.0736444	-0.157186	-0.285239	0.38556	1.02783	1.88385	3.25018	1.09849	1.34818	7	7	5	4	1.72171	-0.21714	0.000432538	1.93885	TTC28_HUMAN Tetratricopeptide repeat protein 28 OS=Homo sapiens GN=TTC28 PE=1 SV=4
Q9H7C4	SYNCI_HUMAN	-1.94328	-0.412206	-0.509512	0.192115	0.114717	-0.306813	-0.104337	-0.498056	0.121826	0.486882	2.08545	2.14607	1.68663	1.4234	5	3	7	9	1.56569	-0.371727	0.000193405	1.93741	SYNCI_HUMAN Syncoilin OS=Homo sapiens GN=SYNC PE=1 SV=3
Q14116	IL18_HUMAN	-1.25648	-0.49138	-0.778226	0.288459	-0.404468	-0.653591	-0.427032	-0.384905	-0.574636	0.293358	1.59423	0.956667	1.90575	2.32297	4	1	3	4	1.4146	-0.520251	5.3969e-05	1.93485	IL18_HUMAN Interleukin-18 OS=Homo sapiens GN=IL18 PE=1 SV=1
Q96T76	MMS19_HUMAN	-0.0730878	-0.578685	-2.44858	-0.698574	-0.0795413	-0.45438	-1.11189	-1.44199	-1.35568	0.856343	2.11481	1.32297	0.27514	0.524966	7	10	11	8	1.01885	-0.915823	0.000588334	1.93467	MMS19_HUMAN MMS19 nucleotide excision repair protein homolog OS=Homo sapiens GN=MMS19 PE=1 SV=2
P46379	BAG6_HUMAN	-1.13701	-0.169082	-0.511549	-1.59476	-0.768101	-0.787709	-1.0504	-0.743404	-0.829138	0.426968	1.36417	2.36074	0.347442	0.945878	14	10	17	14	1.08904	-0.843462	6.05946e-05	1.9325	BAG6_HUMAN Large proline-rich protein BAG6 OS=Homo sapiens GN=BAG6 PE=1 SV=2
Q6ZSR9	YJ005_HUMAN	0.707583	-0.504568	-0.523156	-1.87349	-0.587919	-0.576643	-1.41528	-1.28332	-1.48974	0.347742	1.51958	1.96213	0.738846	0.875202	2	3	3	1	1.0887	-0.838504	0.000495011	1.9272	YJ005_HUMAN Uncharacterized protein FLJ45252 OS=Homo sapiens PE=2 SV=2
Q9Y2V7	COG6_HUMAN	-1.72567	-1.04503	0.212088	-0.690393	-1.0293	-0.979154	-0.89124	-1.22036	-1.05546	0.601371	1.79101	0.816831	0.605746	1.13534	6	4	4	5	0.990058	-0.936058	1.95821e-05	1.92612	COG6_HUMAN Conserved oligomeric Golgi complex subunit 6 OS=Homo sapiens GN=COG6 PE=1 SV=2
A6NDU8	CE051_HUMAN	-1.72843	-1.87494	0.215077	-1.19227	0.193528	-0.121963	0.0547142	-0.201607	-0.329426	0.294629	2.62912	1.2946	1.21508	1.41354	4	5	7	4	1.36939	-0.553925	0.00128872	1.92332	CE051_HUMAN UPF0600 protein C5orf51 OS=Homo sapiens GN=C5orf51 PE=1 SV=1
P51812	KS6A3_HUMAN	-1.4811	0.00795823	0.228453	-0.895831	0.304759	0.109763	-0.645342	-0.716364	-0.34163	0.293307	1.24706	2.01894	1.9603	2.18142	13	6	9	16	1.54021	-0.381037	0.000237652	1.92124	KS6A3_HUMAN Ribosomal protein S6 kinase alpha-3 OS=Homo sapiens GN=RPS6KA3 PE=1 SV=1
O43314	VIP2_HUMAN	-1.60831	-0.366243	-0.57186	-1.08399	0.140634	-0.154497	-0.0963102	0.0399435	0.158434	0.431834	1.24249	2.52063	1.5512	1.89119	10	12	9	7	1.52747	-0.393579	0.00023012	1.92105	VIP2_HUMAN Inositol hexakisphosphate and diphosphoinositol-pentakisphosphate kinase 2 OS=Homo sapiens GN=PPIP5K2 PE=1 SV=3
Q9NYJ8	TAB2_HUMAN	-1.85032	-0.395341	-0.831235	-0.499162	0.0538904	-0.098808	-0.331347	-0.451009	-0.875476	1.49657	2.23335	0.205899	1.1512	1.5654	5	3	3	3	1.33048	-0.586534	0.000139502	1.91702	TAB2_HUMAN TGF-beta-activated kinase 1 and MAP3K7-binding protein 2 OS=Homo sapiens GN=TAB2 PE=1 SV=1
O95817	BAG3_HUMAN	-1.85796	0.140484	0.0791848	0.892175	-0.401156	-0.477685	0.18871	-0.375346	-0.808539	2.34773	2.21955	2.1404	0.486412	0.89325	26	13	23	25	1.61747	-0.291125	0.00108671	1.9086	BAG3_HUMAN BAG family molecular chaperone regulator 3 OS=Homo sapiens GN=BAG3 PE=1 SV=3
Q8IWZ3	ANKH1_HUMAN	-0.926917	-0.309459	-0.53486	-1.53235	-0.106901	-0.432568	0.0342556	0.0203587	-0.00375676	1.68343	1.75524	2.10325	0.686017	1.18483	16	13	12	12	1.48255	-0.421355	3.40714e-05	1.90391	ANKH1_HUMAN Ankyrin repeat and KH domain-containing protein 1 OS=Homo sapiens GN=ANKHD1 PE=1 SV=1
O95163	ELP1_HUMAN	-1.52685	-1.33061	0.172744	-1.175	-0.0157046	-0.0492979	-0.301892	-0.53419	-0.401791	1.08972	1.54307	1.63151	1.16522	1.2218	20	21	17	17	1.33026	-0.573621	3.00138e-05	1.90389	ELP1_HUMAN Elongator complex protein 1 OS=Homo sapiens GN=IKBKAP PE=1 SV=3
Q8N7R7	CCYL1_HUMAN	-1.94835	-1.94152	-0.73734	1.24621	-0.70475	-0.341481	-0.375812	-0.370552	-0.487158	2.239	1.49181	1.4107	0.396178	0.829575	3	1	2	1	1.27345	-0.628972	0.00212499	1.90242	CCYL1_HUMAN Cyclin-Y-like protein 1 OS=Homo sapiens GN=CCNYL1 PE=1 SV=2
Q96IF1	AJUBA_HUMAN	-2.38861	-0.0951369	-1.13956	-2.97484	0.623149	0.505812	-0.0185049	-0.236532	0.165456	1.57909	2.18915	0.222657	1.34056	1.08751	1	3	4	3	1.28379	-0.61764	0.010549	1.90143	AJUBA_HUMAN LIM domain-containing protein ajuba OS=Homo sapiens GN=AJUBA PE=1 SV=1
P48507	GSH0_HUMAN	-0.317955	-1.73435	0.292099	-2.82031	-1.54567	-2.12253	-2.01917	-2.48218	-2.3176	-0.0689581	0.791935	1.23166	-0.315612	-0.508249	9	8	5	11	0.226154	-1.67419	0.00356733	1.90034	GSH0_HUMAN Glutamate--cysteine ligase regulatory subunit OS=Homo sapiens GN=GCLM PE=1 SV=1
O60921	HUS1_HUMAN	-1.63863	-0.820435	-3.41032	-0.895877	0.0317504	0.144058	0.0829081	-0.173845	0.220915	0.784609	0.896585	2.09332	1.02153	1.10733	4	5	1	1	1.18067	-0.717719	0.00574745	1.89839	HUS1_HUMAN Checkpoint protein HUS1 OS=Homo sapiens GN=HUS1 PE=1 SV=1
Q13418	ILK_HUMAN	-1.83314	-1.48065	-0.501666	-1.55314	0.371954	0.0815526	0.100539	0.0680815	0.0122182	-0.0141477	1.72395	1.40544	1.7821	1.95806	20	10	11	16	1.37108	-0.526029	0.00159717	1.89711	ILK_HUMAN Integrin-linked protein kinase OS=Homo sapiens GN=ILK PE=1 SV=2
P14649	MYL6B_HUMAN	-2.67215	-0.595498	-0.764144	-4.73598	0.634212	0.302027	-0.197848	-0.209128	-0.292648	0.98965	0.206676	0.83158	1.4848	1.23105	8	5	7	5	0.948751	-0.947906	0.0332986	1.89666	MYL6B_HUMAN Myosin light chain 6B OS=Homo sapiens GN=MYL6B PE=1 SV=1
Q15742	NAB2_HUMAN	-1.67033	0.0165775	-0.884551	0.672801	0.580086	0.103941	-0.268921	-0.488356	0.514007	1.63302	1.21167	2.38223	1.67224	1.77611	3	4	2	2	1.73505	-0.158305	0.000286531	1.89336	NAB2_HUMAN NGFI-A-binding protein 2 OS=Homo sapiens GN=NAB2 PE=1 SV=1
Q9UJX6	ANC2_HUMAN	-0.987161	0.0833676	-1.35618	-1.29466	-0.807188	-0.500056	-0.28628	-0.517604	-0.357529	1.23559	1.59179	2.2421	0.490686	0.554346	8	3	3	3	1.2229	-0.669255	7.55782e-05	1.89216	ANC2_HUMAN Anaphase-promoting complex subunit 2 OS=Homo sapiens GN=ANAPC2 PE=1 SV=1
O43396	TXNL1_HUMAN	-1.61023	-2.46841	-1.72559	-1.17866	-1.50451	-1.51117	-1.54255	-1.86374	-1.6591	0.626672	1.11402	0.386104	-0.507156	-0.536221	7	10	8	7	0.216683	-1.67377	2.24453e-05	1.89046	TXNL1_HUMAN Thioredoxin-like protein 1 OS=Homo sapiens GN=TXNL1 PE=1 SV=3
P11441	UBL4A_HUMAN	-0.632981	-1.01716	0.23746	-0.459518	-2.0564	-2.14065	-1.17481	-1.04522	-0.72716	1.29943	2.4363	2.72718	-1.33335	-0.693617	2	2	4	2	0.887189	-1.00183	0.0167909	1.88902	UBL4A_HUMAN Ubiquitin-like protein 4A OS=Homo sapiens GN=UBL4A PE=1 SV=1
Q7Z4H7	HAUS6_HUMAN	-0.879029	0.356036	-2.20429	-0.411874	0.16881	-0.109563	-0.458352	-0.259944	-0.273386	1.20908	1.48079	2.04878	1.1285	1.31021	8	6	8	6	1.43547	-0.452399	0.000209856	1.88787	HAUS6_HUMAN HAUS augmin-like complex subunit 6 OS=Homo sapiens GN=HAUS6 PE=1 SV=2
O60493	SNX3_HUMAN	-2.3797	-1.47326	0.801183	0.0528759	-0.529075	-0.810936	-0.997582	-1.20305	-1.0986	0.306125	1.72572	1.1056	0.874903	1.17579	10	6	6	5	1.03763	-0.848682	0.00115163	1.88631	SNX3_HUMAN Sorting nexin-3 OS=Homo sapiens GN=SNX3 PE=1 SV=3
Q9H4L7	SMRCD_HUMAN	-0.0592048	-0.912876	-2.63213	-1.60779	0.57464	0.18924	0.172457	0.00295393	0.561782	1.68073	1.11411	1.50475	1.62075	1.4326	4	9	9	8	1.47059	-0.412326	0.00277406	1.88291	SMRCD_HUMAN SWI/SNF-related matrix-associated actin-dependent regulator of chromatin subfamily A containing DEAD/H box 1 OS=Homo sapiens GN=SMARCAD1 PE=1 SV=2
O00165	HAX1_HUMAN	-0.0583153	0.245536	-0.499908	-1.19783	-0.329545	-0.53844	-0.752863	-1.22081	-1.13641	2.13988	1.25802	0.878266	1.15781	0.930498	4	5	4	4	1.27289	-0.609843	2.7277e-05	1.88274	HAX1_HUMAN HCLS1-associated protein X-1 OS=Homo sapiens GN=HAX1 PE=1 SV=2
O43242	PSMD3_HUMAN	-0.438043	-2.39223	-0.320541	-2.80236	-0.757623	-1.00647	-1.40214	-1.64374	-1.56471	0.795791	0.892434	1.17608	-0.142588	-0.17302	20	14	21	25	0.50974	-1.36976	0.000970613	1.8795	PSMD3_HUMAN 26S proteasome non-ATPase regulatory subunit 3 OS=Homo sapiens GN=PSMD3 PE=1 SV=2
Q6SJ93	F111B_HUMAN	-0.985961	-0.906529	0.589495	0.492875	1.24714	1.20069	0.531035	-0.0877747	0.464605	2.1239	2.28651	1.04236	2.60118	2.74162	11	7	4	4	2.15911	0.282841	0.000842965	1.87627	F111B_HUMAN Protein FAM111B OS=Homo sapiens GN=FAM111B PE=1 SV=1
P28715	ERCC5_HUMAN	-1.38107	-0.421859	-1.92041	-0.561357	0.2646	0.33942	0.552591	0.663961	0.490939	1.69319	1.67253	2.70776	0.954946	1.25584	4	5	4	1	1.65685	-0.219243	0.00183941	1.8761	ERCC5_HUMAN DNA repair protein complementing XP-G cells OS=Homo sapiens GN=ERCC5 PE=1 SV=3
P30085	KCY_HUMAN	-1.25777	-2.37612	-2.98644	-3.24156	-0.881962	-1.58199	-1.94645	-2.13712	-1.4996	-2.24865	0.074922	1.20101	0.235948	0.163175	6	9	7	4	-0.114718	-1.98989	0.0048438	1.87517	KCY_HUMAN UMP-CMP kinase OS=Homo sapiens GN=CMPK1 PE=1 SV=3
O95263	PDE8B_HUMAN	-1.08848	-0.441364	1.59758	-1.25835	0.365129	0.448081	-0.196744	-0.616474	-0.0463079	1.49326	2.32889	1.36177	1.58987	1.91374	12	12	7	3	1.73751	-0.137437	0.000729928	1.87494	PDE8B_HUMAN High affinity cAMP-specific and IBMX-insensitive 3',5'-cyclic phosphodiesterase 8B OS=Homo sapiens GN=PDE8B PE=1 SV=2
Q96F86	EDC3_HUMAN	-2.3046	-1.29637	-1.32747	0.0635332	0.485038	-0.00432752	0.373812	0.202921	0.259397	1.25414	2.21503	1.0618	1.14822	1.72154	10	6	6	12	1.48015	-0.394229	0.0020014	1.87438	EDC3_HUMAN Enhancer of mRNA-decapping protein 3 OS=Homo sapiens GN=EDC3 PE=1 SV=1
O95905	ECD_HUMAN	-0.562045	-0.459338	-1.90984	-0.647022	-0.293675	-0.162848	-0.575671	-0.110501	-0.436516	-0.26783	1.45276	2.63807	1.11613	1.53966	8	9	7	2	1.29576	-0.573051	0.000724591	1.86881	ECD_HUMAN Protein ecdysoneless homolog OS=Homo sapiens GN=ECD PE=1 SV=1
Q05932	FOLC_HUMAN	-2.98519	-0.729778	0.570162	0.202736	0.189837	0.391271	0.121369	-0.166697	0.439468	0.799383	2.0314	2.69434	1.24207	1.43835	8	7	7	8	1.64111	-0.218536	0.00591598	1.85964	FOLC_HUMAN Folylpolyglutamate synthase, mitochondrial OS=Homo sapiens GN=FPGS PE=1 SV=3
Q8TC07	TBC15_HUMAN	-0.905497	-0.576749	-0.0735743	-2.15036	-0.188236	-0.387928	-0.163986	-0.31144	-0.416527	0.268541	1.28257	2.61935	0.936217	1.31026	11	7	9	11	1.28339	-0.574922	0.000584924	1.85831	TBC15_HUMAN TBC1 domain family member 15 OS=Homo sapiens GN=TBC1D15 PE=1 SV=2
Q08J23	NSUN2_HUMAN	-2.79972	-1.07996	1.2781	-0.0643053	0.645352	0.50049	0.30911	0.00800254	0.439796	0.662713	2.4392	1.66773	1.89628	2.18329	52	43	47	53	1.76984	-0.0847927	0.00843713	1.85463	NSUN2_HUMAN tRNA (cytosine(34)-C(5))-methyltransferase OS=Homo sapiens GN=NSUN2 PE=1 SV=2
P04150	GCR_HUMAN	-1.35491	-0.493405	-0.832354	0.802722	0.93782	0.613796	0.44829	0.466178	0.406559	2.37963	2.30951	1.42997	1.66843	2.00446	20	16	13	14	1.9584	0.110522	0.000463954	1.84788	GCR_HUMAN Glucocorticoid receptor OS=Homo sapiens GN=NR3C1 PE=1 SV=1
Q8N6R0	MET13_HUMAN	-1.38904	-0.982545	-0.919886	-0.401351	0.20913	0.131682	-0.092829	-0.0117701	0.109504	1.5312	2.01096	1.75175	0.959043	1.12432	13	13	13	10	1.47546	-0.371901	5.0464e-05	1.84736	MET13_HUMAN Methyltransferase-like protein 13 OS=Homo sapiens GN=METTL13 PE=1 SV=1
Q8IU81	I2BP1_HUMAN	-1.49704	-1.11069	-0.140717	-0.720798	-0.0356676	-0.130967	-0.0909449	-0.142598	-0.294116	0.564624	1.99514	1.8706	1.0606	1.4284	10	10	9	12	1.38387	-0.462616	5.88414e-05	1.84649	I2BP1_HUMAN Interferon regulatory factor 2-binding protein 1 OS=Homo sapiens GN=IRF2BP1 PE=1 SV=1
Q99707	METH_HUMAN	-1.55242	-0.458724	-1.36315	-0.516398	0.207715	-0.0996411	0.436291	-0.212749	0.238246	0.678689	1.26165	1.9928	1.43565	2.01592	19	14	10	5	1.47694	-0.368981	0.00027389	1.84592	METH_HUMAN Methionine synthase OS=Homo sapiens GN=MTR PE=1 SV=2
Q96S55	WRIP1_HUMAN	-2.09128	0.0165901	-0.698766	0.457502	0.915567	0.717621	1.15541	0.782417	0.877484	2.24468	2.20826	1.44362	1.95682	2.5578	19	6	13	13	2.08224	0.236949	0.00275955	1.84529	WRIP1_HUMAN ATPase WRNIP1 OS=Homo sapiens GN=WRNIP1 PE=1 SV=2
Q9ULH7	MKL2_HUMAN	-0.223973	0.173222	-0.622677	-0.257618	-0.426324	-0.342778	-1.37907	-1.58963	-1.37836	0.149891	1.15068	3.80471	0.0670238	0.687776	2	2	1	2	1.17202	-0.671912	0.00715124	1.84393	MKL2_HUMAN MKL/myocardin-like protein 2 OS=Homo sapiens GN=MKL2 PE=1 SV=3
Q9UJY4	GGA2_HUMAN	-0.394757	-0.295411	-0.839095	-0.496906	-0.347813	-0.703241	-0.7278	-0.8069	-1.28797	0.460698	0.642524	2.24742	1.13812	1.43682	3	5	4	2	1.18512	-0.655544	1.80285e-05	1.84066	GGA2_HUMAN ADP-ribosylation factor-binding protein GGA2 OS=Homo sapiens GN=GGA2 PE=1 SV=3
Q5TKA1	LIN9_HUMAN	-0.865605	-0.723232	-0.684496	-0.0214623	0.746226	0.252118	-0.00663143	0.268858	0.418834	1.83015	2.83645	0.988313	1.5337	1.67204	5	4	2	3	1.77213	-0.0683768	0.000145591	1.84051	LIN9_HUMAN Protein lin-9 homolog OS=Homo sapiens GN=LIN9 PE=1 SV=1
Q9BTT0	AN32E_HUMAN	-1.67972	-2.46427	-1.69888	-1.9613	0.44042	-0.245107	-0.286608	-0.427349	-0.169858	0.262032	2.0264	0.238017	1.28332	0.669729	8	12	10	10	0.8959	-0.94363	0.00414661	1.83953	AN32E_HUMAN Acidic leucine-rich nuclear phosphoprotein 32 family member E OS=Homo sapiens GN=ANP32E PE=1 SV=1
Q9BZX2	UCK2_HUMAN	-1.53309	-0.936855	-0.575357	-4.35417	-0.898763	-1.05595	-0.320869	-0.324327	-0.553187	-0.394997	0.164517	1.43489	0.979201	1.12914	6	5	5	7	0.66255	-1.17251	0.0120054	1.83506	UCK2_HUMAN Uridine-cytidine kinase 2 OS=Homo sapiens GN=UCK2 PE=1 SV=1
O43683	BUB1_HUMAN	-1.38073	-0.862944	0.0101079	2.80122	0.117927	0.179891	-0.245149	-0.653221	-0.298613	2.29616	2.58899	1.57511	1.00136	1.51951	3	2	6	5	1.79623	-0.0368349	0.00778921	1.83306	BUB1_HUMAN Mitotic checkpoint serine/threonine-protein kinase BUB1 OS=Homo sapiens GN=BUB1 PE=1 SV=1
Q9H0C8	ILKAP_HUMAN	-0.935808	-2.29552	-1.56189	-1.87024	-1.54722	-0.870816	-1.53751	-1.26716	-1.17693	-0.232216	1.80588	1.70134	-0.758162	-0.609191	5	4	4	6	0.381531	-1.45146	0.00172834	1.83299	ILKAP_HUMAN Integrin-linked kinase-associated serine/threonine phosphatase 2C OS=Homo sapiens GN=ILKAP PE=1 SV=1
Q8NHU6	TDRD7_HUMAN	-1.82896	-1.09683	-0.596879	-0.630527	0.480384	0.0585199	0.0337777	-0.744056	0.0915779	0.323712	2.31332	2.28188	0.906031	0.96669	6	7	2	4	1.35833	-0.470333	0.00122549	1.82866	TDRD7_HUMAN Tudor domain-containing protein 7 OS=Homo sapiens GN=TDRD7 PE=1 SV=2
Q96K76	UBP47_HUMAN	-0.815994	-1.66074	-1.98693	-2.89413	-0.547247	-0.725689	-0.63837	-0.86889	-0.773681	-0.92269	0.382977	2.65861	0.231832	0.724795	13	17	19	20	0.615105	-1.21241	0.00638969	1.82751	UBP47_HUMAN Ubiquitin carboxyl-terminal hydrolase 47 OS=Homo sapiens GN=USP47 PE=1 SV=3
P11274	BCR_HUMAN	-1.02129	-0.0497953	0.172751	-0.550796	-0.689806	-0.968352	-0.257519	-0.695804	-0.33669	1.29174	1.7841	1.39249	1.11786	1.09084	6	3	7	4	1.33541	-0.488589	1.24696e-06	1.82399	BCR_HUMAN Breakpoint cluster region protein OS=Homo sapiens GN=BCR PE=1 SV=2
O75419	CDC45_HUMAN	-0.123371	0.259325	-1.17246	-0.469705	0.687316	0.551615	0.463667	0.0998781	0.145779	1.72907	1.5821	1.83731	1.77439	2.4043	6	4	4	7	1.86543	0.0491155	3.25278e-05	1.81632	CDC45_HUMAN Cell division control protein 45 homolog OS=Homo sapiens GN=CDC45 PE=1 SV=1
Q03013	GSTM4_HUMAN	-0.795626	-0.175137	-0.458195	-0.183804	0.935594	0.274596	-0.0465573	-0.058241	0.66008	0.754824	1.31032	2.26585	2.59184	2.24224	4	8	5	3	1.83301	0.0169675	0.000213663	1.81605	GSTM4_HUMAN Glutathione S-transferase Mu 4 OS=Homo sapiens GN=GSTM4 PE=1 SV=3
Q9BYT8	NEUL_HUMAN	-0.906237	-2.92057	-0.0775459	-4.26748	-1.30875	-1.35834	-1.8544	-1.86725	-2.0053	-0.245607	0.507046	0.396119	-0.486724	-0.300695	16	10	12	6	-0.0259724	-1.84065	0.00758713	1.81468	NEUL_HUMAN Neurolysin, mitochondrial OS=Homo sapiens GN=NLN PE=1 SV=1
Q9UKK3	PARP4_HUMAN	0.481264	-1.68749	-1.2447	-1.35996	-0.642728	-0.503421	0.20988	-0.401597	-0.288554	1.44319	0.925674	2.46061	0.322981	0.894435	8	14	4	5	1.20938	-0.604143	0.000961023	1.81352	PARP4_HUMAN Poly [ADP-ribose] polymerase 4 OS=Homo sapiens GN=PARP4 PE=1 SV=3
Q9Y296	TPPC4_HUMAN	-0.53076	-0.91279	0.0333568	-1.82065	-1.11195	-0.931266	-0.849582	-0.469617	-1.08782	1.28854	1.83357	1.66089	-0.288139	0.266804	2	3	4	2	0.952332	-0.853454	0.00044865	1.80579	TPPC4_HUMAN Trafficking protein particle complex subunit 4 OS=Homo sapiens GN=TRAPPC4 PE=1 SV=1
Q9UGJ1	GCP4_HUMAN	-0.906179	-0.939923	-0.130572	-0.323184	-0.121569	-0.519494	-0.790999	-0.928244	-1.06188	0.921793	1.06032	1.77106	1.01368	1.08138	6	13	5	3	1.16965	-0.635783	1.11434e-06	1.80543	GCP4_HUMAN Gamma-tubulin complex component 4 OS=Homo sapiens GN=TUBGCP4 PE=1 SV=1
Q15813	TBCE_HUMAN	-0.999079	-1.05775	-2.23594	-1.13974	-0.631627	-1.15877	-1.16736	-1.00744	-1.0991	1.19831	1.46052	0.959144	-0.181862	-0.247658	6	8	13	11	0.637691	-1.16631	0.000122414	1.804	TBCE_HUMAN Tubulin-specific chaperone E OS=Homo sapiens GN=TBCE PE=1 SV=1
Q86UA1	PRP39_HUMAN	-1.23883	-0.394728	0.140925	0.489317	-0.000910494	-0.378021	0.165151	-1.21206	-0.278088	1.12928	1.34358	1.30851	1.58719	2.14254	9	2	4	2	1.50222	-0.300805	6.11819e-05	1.80303	PRP39_HUMAN Pre-mRNA-processing factor 39 OS=Homo sapiens GN=PRPF39 PE=1 SV=3
Q96FZ2	HMCES_HUMAN	-2.40625	0.525904	-0.51516	0.796857	0.377677	0.262614	0.419187	0.498504	0.39502	1.27106	3.25434	1.22585	1.5714	1.88014	6	7	7	5	1.84056	0.0393726	0.00481439	1.80119	HMCES_HUMAN Embryonic stem cell-specific 5-hydroxymethylcytosine-binding protein OS=Homo sapiens GN=HMCES PE=1 SV=1
Q5W0V3	F16B1_HUMAN	0.0596047	-1.86934	-1.93485	-1.87094	-0.21418	-0.410824	-0.692349	-0.857643	-0.541947	-0.639377	1.55502	2.4965	0.431129	0.52417	3	8	4	5	0.873488	-0.92583	0.00475314	1.79932	F16B1_HUMAN Protein FAM160B1 OS=Homo sapiens GN=FAM160B1 PE=1 SV=1
Q05513	KPCZ_HUMAN	-1.9589	-1.00228	0.836265	-0.0466897	0.62404	-0.120713	-0.552796	-0.366524	-0.0147826	1.27402	2.04528	0.491278	2.09011	1.6331	1	2	1	1	1.50676	-0.289154	0.00144774	1.79591	KPCZ_HUMAN Protein kinase C zeta type OS=Homo sapiens GN=PRKCZ PE=1 SV=4
Q13042	CDC16_HUMAN	-1.68721	-0.561282	-0.444199	-1.73117	0.0130634	0.0872361	0.185617	-0.433505	0.0425631	1.13563	2.07966	2.02319	0.580151	0.641195	8	5	5	6	1.29197	-0.50321	0.000864443	1.79518	CDC16_HUMAN Cell division cycle protein 16 homolog OS=Homo sapiens GN=CDC16 PE=1 SV=2
Q86TG7	PEG10_HUMAN	-1.27842	-0.573759	-1.12431	-1.92404	0.62636	0.488242	0.0321626	-0.136859	0.551468	1.79668	1.29233	0.968287	1.54361	1.51435	10	9	8	11	1.42305	-0.371017	0.00122778	1.79407	PEG10_HUMAN Retrotransposon-derived protein PEG10 OS=Homo sapiens GN=PEG10 PE=1 SV=2
Q9H3H1	MOD5_HUMAN	-1.22029	-0.463147	-1.76107	-1.74381	-0.00502853	-0.437167	-1.12022	-0.882743	-0.950928	-0.011712	0.84462	1.95687	0.969785	0.440511	6	2	2	2	0.840016	-0.953823	0.000302061	1.79384	MOD5_HUMAN tRNA dimethylallyltransferase, mitochondrial OS=Homo sapiens GN=TRIT1 PE=1 SV=1
Q96KP4	CNDP2_HUMAN	-2.06683	-1.78925	-1.17023	-2.43502	-2.35289	-2.12788	-2.232	-2.00117	-2.36754	0.0246275	0.926383	0.512108	-1.61853	-1.19446	8	8	13	14	-0.269974	-2.06031	0.00069058	1.79034	CNDP2_HUMAN Cytosolic non-specific dipeptidase OS=Homo sapiens GN=CNDP2 PE=1 SV=2
O95382	M3K6_HUMAN	-0.62376	-0.947559	-0.675897	-0.600413	0.0904685	-0.102207	-0.771518	-0.187891	-0.673763	2.13415	2.1204	1.02199	0.511134	0.660595	9	4	4	2	1.28965	-0.499171	6.32736e-05	1.78883	M3K6_HUMAN Mitogen-activated protein kinase kinase kinase 6 OS=Homo sapiens GN=MAP3K6 PE=1 SV=3
Q8WX92	NELFB_HUMAN	-0.815068	-0.811009	-0.111597	-1.64937	0.3568	-0.064976	-0.340097	-0.580645	-0.465007	0.304953	1.95473	1.75668	1.2699	1.15045	13	10	13	12	1.28734	-0.497886	0.000170033	1.78523	NELFB_HUMAN Negative elongation factor B OS=Homo sapiens GN=NELFB PE=1 SV=1
Q92538	GBF1_HUMAN	-0.301801	-1.19082	-2.01645	-1.70106	-0.192035	-0.601929	-1.18826	-1.37782	-0.904299	-0.773775	0.616912	2.48857	0.604541	0.724923	26	15	27	28	0.732234	-1.05272	0.00242245	1.78495	GBF1_HUMAN Golgi-specific brefeldin A-resistance guanine nucleotide exchange factor 1 OS=Homo sapiens GN=GBF1 PE=1 SV=2
Q9Y6J9	TAF6L_HUMAN	-0.809947	-0.28877	-0.823533	-1.39126	0.877341	1.11412	-0.307749	-0.505634	-0.24536	1.14041	1.35574	1.68696	1.49757	1.921	8	4	8	4	1.52033	-0.264532	0.000493208	1.78487	TAF6L_HUMAN TAF6-like RNA polymerase II p300/CBP-associated factor-associated factor 65 kDa subunit 6L OS=Homo sapiens GN=TAF6L PE=1 SV=1
A5YKK6	CNOT1_HUMAN	-1.04016	-0.643347	-0.436424	-2.73466	-0.123526	-0.305894	-0.408302	-0.514507	-0.400325	0.538955	1.15383	2.4146	0.489148	0.655582	40	28	35	27	1.05042	-0.734127	0.00171394	1.78455	CNOT1_HUMAN CCR4-NOT transcription complex subunit 1 OS=Homo sapiens GN=CNOT1 PE=1 SV=2
Q99640	PMYT1_HUMAN	-1.31946	-0.686853	-0.581901	-2.16686	0.159904	0.27109	-0.0941227	-0.578807	-0.893463	1.55403	1.67054	1.43583	0.501534	0.486323	4	4	5	3	1.12965	-0.654497	0.000700742	1.78415	PMYT1_HUMAN Membrane-associated tyrosine- and threonine-specific cdc2-inhibitory kinase OS=Homo sapiens GN=PKMYT1 PE=1 SV=1
Q96AX1	VP33A_HUMAN	-0.818488	-0.822706	0.138698	-0.760469	-0.371021	-0.104503	-0.987987	-1.27986	-1.31362	0.505364	1.96862	2.0334	0.0955361	0.792078	6	5	5	3	1.079	-0.702218	0.00035964	1.78122	VP33A_HUMAN Vacuolar protein sorting-associated protein 33A OS=Homo sapiens GN=VPS33A PE=1 SV=1
O95219	SNX4_HUMAN	-0.884949	-0.762927	0.196967	-0.785915	-0.142841	-0.311687	-1.54972	-1.41814	-1.16062	0.880588	0.971402	1.1699	1.08376	1.007	5	5	5	4	1.02253	-0.757759	2.42364e-05	1.78029	SNX4_HUMAN Sorting nexin-4 OS=Homo sapiens GN=SNX4 PE=1 SV=1
P46940	IQGA1_HUMAN	-0.232874	-1.3858	-0.605798	-0.0228322	0.0140846	0.110578	-0.200223	0.134628	0.201873	3.58449	1.01598	2.19897	0.428925	0.566889	117	85	72	74	1.55905	-0.220707	0.00322191	1.77976	IQGA1_HUMAN Ras GTPase-activating-like protein IQGAP1 OS=Homo sapiens GN=IQGAP1 PE=1 SV=1
O14713	ITBP1_HUMAN	-0.820822	0.214859	-0.202498	-0.530913	0.529018	0.944879	-1.80679	-2.10122	-3.1098	1.33084	1.43338	-0.274413	1.29546	1.28905	4	2	3	1	1.01486	-0.764809	0.0182695	1.77967	ITBP1_HUMAN Integrin beta-1-binding protein 1 OS=Homo sapiens GN=ITGB1BP1 PE=1 SV=1
Q96F63	CCD97_HUMAN	-2.4342	-0.592017	-1.45496	0.0304855	-0.091523	0.171422	-0.142245	-0.34053	0.115388	1.94683	3.11232	0.137942	0.344745	0.724043	1	7	3	4	1.25317	-0.526465	0.00849783	1.77964	CCD97_HUMAN Coiled-coil domain-containing protein 97 OS=Homo sapiens GN=CCDC97 PE=1 SV=1
O43294	TGFI1_HUMAN	-0.816736	1.14036	-1.82981	-2.18423	-0.945709	-0.883488	-0.373903	-0.109458	-0.636249	-1.37055	2.79306	3.48347	0.312714	-0.0130715	5	10	6	8	1.04112	-0.737691	0.0432758	1.77882	TGFI1_HUMAN Transforming growth factor beta-1-induced transcript 1 protein OS=Homo sapiens GN=TGFB1I1 PE=1 SV=2
Q15014	MO4L2_HUMAN	1.01476	-1.4115	0.383373	-3.21961	0.497115	0.260231	0.0100921	-0.250114	-0.379173	2.94921	1.43351	0.142821	1.27003	1.36461	7	5	4	1	1.43204	-0.343869	0.0201828	1.77591	MO4L2_HUMAN Mortality factor 4-like protein 2 OS=Homo sapiens GN=MORF4L2 PE=1 SV=1
Q9Y4P1	ATG4B_HUMAN	-0.488424	-1.0746	-0.301966	-0.936027	-0.315611	-0.80403	-1.86148	-1.26584	-2.14089	0.871949	1.27513	1.64228	-0.0254171	-0.00549498	1	3	7	2	0.751691	-1.02099	0.000572207	1.77268	ATG4B_HUMAN Cysteine protease ATG4B OS=Homo sapiens GN=ATG4B PE=1 SV=2
P32119	PRDX2_HUMAN	0.28007	-1.05877	-1.51086	-2.86404	-2.23382	-2.10615	-2.55753	-2.54885	-2.7154	-0.479188	1.38111	2.03298	-1.71568	-1.98033	13	6	10	8	-0.152222	-1.92393	0.0342465	1.77171	PRDX2_HUMAN Peroxiredoxin-2 OS=Homo sapiens GN=PRDX2 PE=1 SV=5
Q9UJY1	HSPB8_HUMAN	-0.827455	0.16564	-0.648108	0.606644	-0.294545	0.126537	-0.286747	-0.422671	-0.0904304	1.89874	1.93652	1.74632	1.01528	1.33035	11	4	3	6	1.58544	-0.185682	8.08187e-06	1.77113	HSPB8_HUMAN Heat shock protein beta-8 OS=Homo sapiens GN=HSPB8 PE=1 SV=1
P51692	STA5B_HUMAN	-1.02507	0.296157	-0.775439	-0.944212	-0.060386	-0.65974	-0.78701	-1.65036	-1.28493	-0.688737	0.721342	2.68581	1.01553	1.28806	8	10	8	8	1.0044	-0.765666	0.00282525	1.77007	STA5B_HUMAN Signal transducer and activator of transcription 5B OS=Homo sapiens GN=STAT5B PE=1 SV=2
O95671	ASML_HUMAN	-0.960974	-0.714869	-0.952662	0.41199	0.541725	-0.195083	-1.80147	-1.75945	-2.24094	0.48108	0.713462	1.62701	0.667726	1.07427	2	3	4	2	0.912711	-0.852415	0.00270835	1.76513	ASML_HUMAN N-acetylserotonin O-methyltransferase-like protein OS=Homo sapiens GN=ASMTL PE=1 SV=3
Q9BWH6	RPAP1_HUMAN	-0.177037	0.396191	-1.51738	-1.26286	-0.276407	-0.258937	-0.415975	0.055286	-1.12416	1.51227	0.265284	2.08989	0.822955	1.54515	7	5	9	2	1.24711	-0.50903	0.000500987	1.75614	RPAP1_HUMAN RNA polymerase II-associated protein 1 OS=Homo sapiens GN=RPAP1 PE=1 SV=3
P35998	PRS7_HUMAN	-0.787021	-3.04265	-0.61227	-1.99506	-0.894039	-1.24046	-1.83474	-1.88593	-1.77901	-0.319412	-0.418557	1.76161	-0.138217	0.0762224	33	18	24	28	0.19233	-1.56346	0.00216871	1.75579	PRS7_HUMAN 26S protease regulatory subunit 7 OS=Homo sapiens GN=PSMC2 PE=1 SV=3
O00170	AIP_HUMAN	-1.50777	-0.27607	0.42782	0.200146	-0.258002	-0.379857	-0.787941	-1.02678	-0.792559	1.8442	2.84456	0.533739	0.40189	0.693015	11	8	10	10	1.26348	-0.489002	0.00173466	1.75248	AIP_HUMAN AH receptor-interacting protein OS=Homo sapiens GN=AIP PE=1 SV=2
O94972	TRI37_HUMAN	-0.19554	-1.519	-1.20985	0.0379806	0.106039	-0.106401	0.213654	-0.201038	-0.229156	1.92154	2.42975	1.64228	0.260038	0.76526	3	3	2	1	1.40377	-0.344813	0.000813637	1.74859	TRI37_HUMAN E3 ubiquitin-protein ligase TRIM37 OS=Homo sapiens GN=TRIM37 PE=1 SV=2
P45974	UBP5_HUMAN	-0.514077	-0.301839	-3.12985	-1.40944	-1.12801	-1.59781	-1.40452	-1.56607	-1.90164	-0.167323	1.76451	1.29603	-0.719825	-0.641905	15	14	21	22	0.306296	-1.43925	0.00607797	1.74555	UBP5_HUMAN Ubiquitin carboxyl-terminal hydrolase 5 OS=Homo sapiens GN=USP5 PE=1 SV=2
P23458	JAK1_HUMAN	0.244203	-0.0746797	-1.26409	-2.67932	0.235131	-0.162515	-0.131649	0.205944	0.380233	0.787234	1.01137	1.95371	1.46858	1.68236	6	4	2	1	1.38065	-0.360749	0.00344513	1.7414	JAK1_HUMAN Tyrosine-protein kinase JAK1 OS=Homo sapiens GN=JAK1 PE=1 SV=2
O15111	IKKA_HUMAN	-1.05046	-0.521845	0.11979	-0.935731	-0.0648813	-0.391924	-0.290369	-0.382494	-0.294344	1.13698	1.31834	1.51773	1.2318	1.35352	4	7	7	6	1.31167	-0.423584	4.40995e-07	1.73526	IKKA_HUMAN Inhibitor of nuclear factor kappa-B kinase subunit alpha OS=Homo sapiens GN=CHUK PE=1 SV=2
Q15276	RABE1_HUMAN	-0.390636	-0.565607	-2.50366	-1.42122	-1.33416	-0.966146	-0.932482	-1.18479	-0.655478	0.43543	0.477521	2.00025	-0.210294	0.43485	8	3	10	6	0.627551	-1.10602	0.00079111	1.73357	RABE1_HUMAN Rab GTPase-binding effector protein 1 OS=Homo sapiens GN=RABEP1 PE=1 SV=2
A6NED2	RCCD1_HUMAN	-0.832442	-0.325162	-0.256995	-0.937065	-0.248658	-0.368749	-0.468472	-0.360543	-0.162871	1.65759	2.1133	1.43049	0.551407	0.688584	3	4	5	2	1.28827	-0.440106	1.32339e-05	1.72838	RCCD1_HUMAN RCC1 domain-containing protein 1 OS=Homo sapiens GN=RCCD1 PE=1 SV=1
Q9Y580	RBM7_HUMAN	-1.9754	-1.33189	-0.451948	-1.70965	0.918999	0.690079	0.930834	0.408102	0.605555	2.61779	1.20079	0.715866	1.34071	1.69403	4	3	2	3	1.51384	-0.212813	0.0119389	1.72665	RBM7_HUMAN RNA-binding protein 7 OS=Homo sapiens GN=RBM7 PE=1 SV=1
Q9BR61	ACBD6_HUMAN	-0.611176	-0.419865	-0.489047	-0.719991	-0.568825	-0.899998	-1.83324	-2.51731	-3.07169	-0.61421	1.39343	0.802824	0.0864777	0.780635	3	5	3	1	0.489832	-1.23679	0.00567765	1.72663	ACBD6_HUMAN Acyl-CoA-binding domain-containing protein 6 OS=Homo sapiens GN=ACBD6 PE=1 SV=1
P15374	UCHL3_HUMAN	-1.81169	-1.16612	-1.8726	-1.47826	-1.08822	-1.11533	-1.35195	-1.55504	-1.92397	-0.370848	1.43941	0.709693	-0.665116	0.0736768	7	2	10	7	0.237364	-1.4848	0.000130861	1.72216	UCHL3_HUMAN Ubiquitin carboxyl-terminal hydrolase isozyme L3 OS=Homo sapiens GN=UCHL3 PE=1 SV=1
P24941	CDK2_HUMAN	-0.567219	-1.08241	-1.74048	-1.63686	-0.360707	-0.613233	-1.00321	-0.964262	-1.15666	0.183744	0.818349	0.908156	0.920229	0.704146	11	11	8	11	0.706925	-1.01389	8.61065e-06	1.72082	CDK2_HUMAN Cyclin-dependent kinase 2 OS=Homo sapiens GN=CDK2 PE=1 SV=2
Q63HN8	RN213_HUMAN	-1.6661	-0.557369	-0.0237911	-0.846934	0.274686	0.112631	0.145824	-0.284556	0.13233	0.794376	1.66321	2.07012	1.17164	1.39665	23	33	23	14	1.4192	-0.301475	0.000201536	1.72067	RN213_HUMAN E3 ubiquitin-protein ligase RNF213 OS=Homo sapiens GN=RNF213 PE=1 SV=3
P49754	VPS41_HUMAN	-1.54662	-1.07132	0.403762	-0.573277	-0.624617	-0.556822	-0.378824	-0.22254	-0.01932	1.54334	3.03163	0.336756	0.709449	0.431683	1	2	4	3	1.21057	-0.509953	0.00223733	1.72052	VPS41_HUMAN Vacuolar protein sorting-associated protein 41 homolog OS=Homo sapiens GN=VPS41 PE=1 SV=3
Q7L1Q6	BZW1_HUMAN	-0.748944	-2.92767	-1.90034	-1.88112	-1.08612	-1.18611	-2.61503	-2.42427	-2.35995	-1.7586	-0.0156903	0.114757	0.136406	0.568501	17	17	17	19	-0.190925	-1.90328	0.00251236	1.71236	BZW1_HUMAN Basic leucine zipper and W2 domain-containing protein 1 OS=Homo sapiens GN=BZW1 PE=1 SV=1
Q96CN9	GCC1_HUMAN	-2.53493	0.533922	-2.19242	-0.331149	-0.168753	0.0665496	0.412637	0.084653	0.395336	0.217268	1.23483	2.62698	1.0642	1.33563	5	6	4	4	1.29578	-0.414906	0.0133719	1.71069	GCC1_HUMAN GRIP and coiled-coil domain-containing protein 1 OS=Homo sapiens GN=GCC1 PE=1 SV=1
Q9Y5B8	NDK7_HUMAN	-1.36262	-1.2572	0.162076	-1.06346	0.494668	0.409261	0.257699	-0.0640808	0.412809	1.80633	1.50741	1.14489	1.28475	1.66349	4	8	7	5	1.48137	-0.223427	0.000520404	1.7048	NDK7_HUMAN Nucleoside diphosphate kinase 7 OS=Homo sapiens GN=NME7 PE=1 SV=1
O00487	PSDE_HUMAN	-0.91895	-2.02498	-2.07222	-1.95914	-1.25906	-1.76657	-2.15645	-1.99989	-2.18707	0.396876	0.405428	1.02585	-1.09657	-1.3169	12	7	9	9	-0.117062	-1.81604	0.000880623	1.69897	PSDE_HUMAN 26S proteasome non-ATPase regulatory subunit 14 OS=Homo sapiens GN=PSMD14 PE=1 SV=1
Q99871	HAUS7_HUMAN	-0.159035	-0.674642	-0.376423	-0.901264	0.0210531	-0.296002	-0.822869	-0.790806	0.161974	1.23222	1.64066	1.40419	1.18039	0.889547	1	4	4	4	1.2694	-0.426446	1.935e-06	1.69585	HAUS7_HUMAN HAUS augmin-like complex subunit 7 OS=Homo sapiens GN=HAUS7 PE=1 SV=3
Q6PJG6	BRAT1_HUMAN	-2.42175	-0.746565	-1.15906	0.675846	0.547108	0.642187	0.898921	0.419227	0.940214	2.41348	2.24133	1.26352	1.08034	1.35811	14	15	12	13	1.67136	-0.0226525	0.011037	1.69401	BRAT1_HUMAN BRCA1-associated ATM activator 1 OS=Homo sapiens GN=BRAT1 PE=1 SV=2
Q9NTZ6	RBM12_HUMAN	-0.384279	-0.935443	-0.388089	-1.05432	-0.680348	-0.842294	-0.692105	-0.908391	-0.434992	1.79366	0.953154	2.75914	-0.534825	-0.024555	12	7	10	14	0.989315	-0.702251	0.00253041	1.69157	RBM12_HUMAN RNA-binding protein 12 OS=Homo sapiens GN=RBM12 PE=1 SV=1
Q6P1K8	T2H2L_HUMAN	-1.63105	-0.425677	0.108086	-1.78078	1.79948	1.04279	1.08016	0.777452	1.0281	2.28168	2.70333	1.56072	1.79513	1.1936	4	3	5	4	1.90689	0.222062	0.0165985	1.68483	T2H2L_HUMAN General transcription factor IIH subunit 2-like protein OS=Homo sapiens GN=GTF2H2C PE=1 SV=1
Q99426	TBCB_HUMAN	-1.89269	-1.18563	-0.375769	-0.566919	-0.725596	-0.592668	-2.86183	-3.42098	-2.91829	-0.230507	0.908703	0.345281	-0.494694	-0.199236	7	3	6	8	0.0659095	-1.6156	0.0120789	1.68151	TBCB_HUMAN Tubulin-folding cofactor B OS=Homo sapiens GN=TBCB PE=1 SV=2
Q2NKX8	ERC6L_HUMAN	-0.8937	-0.166343	-0.255874	-1.51241	-0.0890551	-0.158576	0.215327	0.207827	-0.481574	0.536286	1.28464	2.78033	0.723234	1.3238	3	7	4	2	1.32966	-0.348264	0.000828213	1.67792	ERC6L_HUMAN DNA excision repair protein ERCC-6-like OS=Homo sapiens GN=ERCC6L PE=1 SV=1
O95864	FADS2_HUMAN	0.226226	-0.332984	-0.397004	-0.0405115	0.71718	-0.059857	-0.95581	-0.683075	0.156944	1.40134	1.92551	1.52744	1.61248	1.15705	5	2	5	5	1.52476	-0.152099	1.93868e-05	1.67686	FADS2_HUMAN Fatty acid desaturase 2 OS=Homo sapiens GN=FADS2 PE=1 SV=1
Q14166	TTL12_HUMAN	-0.292684	-1.6076	-1.60999	-1.56358	-0.851439	-1.09431	-1.65388	-1.80215	-1.95137	0.390841	0.645409	0.367559	0.0738493	0.001422	16	14	21	18	0.295816	-1.38078	2.76289e-05	1.67659	TTL12_HUMAN Tubulin--tyrosine ligase-like protein 12 OS=Homo sapiens GN=TTLL12 PE=1 SV=2
Q9UJC3	HOOK1_HUMAN	0.38806	-0.420701	0.214777	-0.978669	-0.284946	-0.0445187	-1.03037	-0.75579	-1.2222	0.673551	1.31721	1.84263	0.880438	1.35361	4	3	5	2	1.21349	-0.459372	0.000120523	1.67286	HOOK1_HUMAN Protein Hook homolog 1 OS=Homo sapiens GN=HOOK1 PE=1 SV=2
Q9NS91	RAD18_HUMAN	-1.65064	-0.851645	0.727836	-0.957713	0.842348	0.875735	0.887702	0.444867	0.522252	2.56712	2.49459	0.598089	1.30632	1.84878	12	6	7	6	1.76298	0.0934164	0.00722517	1.66956	RAD18_HUMAN E3 ubiquitin-protein ligase RAD18 OS=Homo sapiens GN=RAD18 PE=1 SV=2
O43592	XPOT_HUMAN	-0.264261	-2.10877	-1.26016	-2.42152	-1.1119	-1.10588	-0.964172	-1.12271	-0.88617	0.346504	1.59152	0.97334	-0.27176	-0.544405	12	13	19	12	0.419039	-1.24951	0.00152049	1.66854	XPOT_HUMAN Exportin-T OS=Homo sapiens GN=XPOT PE=1 SV=2
Q9HD67	MYO10_HUMAN	0.467276	0.241652	-1.03875	-0.699915	0.0409993	0.151765	-0.028374	0.156264	0.304778	1.43073	1.04103	1.80813	1.52261	2.31368	24	18	14	10	1.62323	-0.0449232	5.18981e-05	1.66816	MYO10_HUMAN Unconventional myosin-X OS=Homo sapiens GN=MYO10 PE=1 SV=3
Q71U36	TBA1A_HUMAN	-2.38161	-2.14761	-1.29728	-0.606753	0.26305	0.260709	-0.290682	-0.322015	-0.0692166	-0.398154	1.64954	1.0262	0.970091	1.41451	32	30	28	31	0.932436	-0.73238	0.00747169	1.66482	TBA1A_HUMAN Tubulin alpha-1A chain OS=Homo sapiens GN=TUBA1A PE=1 SV=1
Q9BPX3	CND3_HUMAN	-1.46386	-1.03423	-0.354163	-0.694746	0.17149	-0.0884199	0.290443	-0.17044	-0.169001	0.25902	0.832904	2.25587	1.47823	1.53935	26	25	19	25	1.27307	-0.390326	0.000557644	1.6634	CND3_HUMAN Condensin complex subunit 3 OS=Homo sapiens GN=NCAPG PE=1 SV=1
Q15349	KS6A2_HUMAN	-1.81125	-0.596527	0.408043	-1.18074	-0.0464931	0.118916	-0.505059	-0.918569	-0.52575	-0.185787	0.322641	1.65464	1.46073	2.24996	3	2	1	2	1.10044	-0.561936	0.00300729	1.66237	KS6A2_HUMAN Ribosomal protein S6 kinase alpha-2 OS=Homo sapiens GN=RPS6KA2 PE=1 SV=2
Q9H1P3	OSBL2_HUMAN	-1.30989	-0.374929	-0.0720115	-1.69782	-0.0988565	-1.05988	-0.764151	-1.34344	-0.986236	0.211307	1.01716	0.662838	0.881953	1.25506	2	5	1	2	0.805664	-0.856358	9.716e-05	1.66202	OSBL2_HUMAN Oxysterol-binding protein-related protein 2 OS=Homo sapiens GN=OSBPL2 PE=1 SV=1
Q9H4B0	OSGP2_HUMAN	0.171845	-0.117301	-4.38064	-0.348484	0.0475072	-0.257642	-0.92382	-0.469762	-1.60109	0.822941	0.660252	1.67272	0.229689	0.532287	1	3	2	1	0.783579	-0.875487	0.0292559	1.65907	OSGP2_HUMAN Probable tRNA N6-adenosine threonylcarbamoyltransferase, mitochondrial OS=Homo sapiens GN=OSGEPL1 PE=2 SV=2
O00471	EXOC5_HUMAN	-0.25697	-0.786123	0.752532	-1.74926	-0.382494	-0.983159	-1.17139	-1.06645	-1.21634	1.13817	1.14347	1.78272	0.0985695	0.306865	7	3	5	4	0.89396	-0.762183	0.00129065	1.65614	EXOC5_HUMAN Exocyst complex component 5 OS=Homo sapiens GN=EXOC5 PE=1 SV=1
Q9ULT8	HECD1_HUMAN	0.0644938	-1.28375	-0.701801	-2.04558	-0.605291	-0.463586	-0.737496	-0.83744	-0.607496	0.460526	0.973026	2.57309	-0.171401	0.422659	25	26	17	24	0.851581	-0.801994	0.00229021	1.65358	HECD1_HUMAN E3 ubiquitin-protein ligase HECTD1 OS=Homo sapiens GN=HECTD1 PE=1 SV=3
Q9BYN0	SRXN1_HUMAN	0.0862868	-0.138115	-3.68235	-2.17478	-0.500797	-0.478242	-0.951964	-1.44101	-1.01405	-0.0021917	0.336681	2.59212	-0.228725	-0.17718	2	1	2	2	0.504141	-1.14389	0.0275868	1.64803	SRXN1_HUMAN Sulfiredoxin-1 OS=Homo sapiens GN=SRXN1 PE=1 SV=2
Q5TDH0	DDI2_HUMAN	-1.24381	-1.30704	-0.361822	-0.218017	-1.73858	-1.79365	-1.3535	-1.58601	-1.6249	0.677356	1.26027	1.43093	-0.663569	-0.703259	4	4	5	5	0.400346	-1.24748	0.0021077	1.64783	DDI2_HUMAN Protein DDI1 homolog 2 OS=Homo sapiens GN=DDI2 PE=1 SV=1
Q9HB19	PKHA2_HUMAN	-1.9512	0.390407	1.28832	0.0432643	0.404331	0.179922	-0.0757414	-0.256975	0.24639	1.51397	2.46193	0.934449	1.72913	1.73649	11	4	10	16	1.6752	0.029857	0.00242323	1.64534	PKHA2_HUMAN Pleckstrin homology domain-containing family A member 2 OS=Homo sapiens GN=PLEKHA2 PE=1 SV=2
Q96BN8	OTUL_HUMAN	0.109277	-1.52362	-0.239575	-0.452131	-1.23912	-1.40126	-1.8967	-1.68117	-1.73667	0.710115	1.49451	0.600872	-0.145996	-0.0274881	8	2	7	10	0.526403	-1.11788	0.00131979	1.64429	OTUL_HUMAN Ubiquitin thioesterase otulin OS=Homo sapiens GN=OTULIN PE=1 SV=3
Q9H1A4	APC1_HUMAN	-1.37763	-0.435197	-0.655098	-1.55296	-0.0327184	-0.40776	0.262746	0.163895	0.27261	1.26742	1.82117	1.50367	0.589979	0.931975	13	13	15	8	1.22284	-0.418012	0.000478068	1.64085	APC1_HUMAN Anaphase-promoting complex subunit 1 OS=Homo sapiens GN=ANAPC1 PE=1 SV=1
Q96FJ0	STALP_HUMAN	-2.37373	0.289706	0.240508	-0.608632	0.262832	0.73918	0.0490138	0.102865	0.264252	0.899254	2.32067	1.58436	1.58007	1.20387	4	7	3	8	1.51764	-0.11489	0.00353797	1.63253	STALP_HUMAN AMSH-like protease OS=Homo sapiens GN=STAMBPL1 PE=1 SV=2
Q9NPA3	M1IP1_HUMAN	-1.63367	0.452072	-1.6722	-0.775413	0.114955	0.280769	-0.724306	-0.956988	0.111935	1.67916	2.26126	-0.195126	1.36199	0.386378	1	2	1	2	1.09873	-0.53365	0.00584594	1.63238	M1IP1_HUMAN Mid1-interacting protein 1 OS=Homo sapiens GN=MID1IP1 PE=1 SV=1
Q9H9T3	ELP3_HUMAN	-1.0631	-1.40734	-0.649936	-0.726055	-0.373874	-0.367798	-0.618961	-0.749474	-0.842869	1.02577	0.597989	1.89333	0.441639	0.424403	9	8	9	7	0.876625	-0.75549	2.65493e-05	1.63211	ELP3_HUMAN Elongator complex protein 3 OS=Homo sapiens GN=ELP3 PE=1 SV=2
O75334	LIPA2_HUMAN	-1.62012	-2.54591	-0.19423	-0.0563324	-1.16745	-1.42338	-0.454825	-0.498684	-0.553621	1.97835	1.19827	0.844906	-0.369985	-0.222661	3	2	3	3	0.685776	-0.946062	0.00575934	1.63184	LIPA2_HUMAN Liprin-alpha-2 OS=Homo sapiens GN=PPFIA2 PE=1 SV=2
Q70CQ2	UBP34_HUMAN	-1.12885	-0.745751	-0.131971	-0.746715	0.694706	1.19262	-0.0829574	-0.376605	0.445274	1.86639	1.80816	1.8796	1.11214	0.998712	11	7	3	2	1.533	-0.0978054	0.000892256	1.63081	UBP34_HUMAN Ubiquitin carboxyl-terminal hydrolase 34 OS=Homo sapiens GN=USP34 PE=1 SV=2
O60942	MCE1_HUMAN	-1.51368	-1.26662	0.292516	-0.667199	-0.0113946	-0.181188	0.581346	0.219629	0.46518	1.06917	2.18351	1.16997	1.17723	1.38662	4	7	7	6	1.3973	-0.231268	0.00094496	1.62857	MCE1_HUMAN mRNA-capping enzyme OS=Homo sapiens GN=RNGTT PE=1 SV=1
Q9H0P0	5NT3A_HUMAN	-1.13275	-1.26913	-0.152855	0.810062	-0.207618	-0.960752	-1.01777	-0.725302	-1.12757	1.16211	0.91442	0.936061	1.03718	0.875306	14	9	11	9	0.985016	-0.642633	0.000204921	1.62765	5NT3A_HUMAN Cytosolic 5'-nucleotidase 3A OS=Homo sapiens GN=NT5C3A PE=1 SV=3
Q96G46	DUS3L_HUMAN	-0.865564	-1.30353	-1.14089	-0.578854	-0.891747	-0.920033	-0.299298	-0.615331	-0.704806	0.90825	1.79188	1.45666	-0.0132484	-0.082203	7	8	8	8	0.812267	-0.813339	0.000182796	1.62561	DUS3L_HUMAN tRNA-dihydrouridine(47) synthase [NAD(P)(+)]-like OS=Homo sapiens GN=DUS3L PE=1 SV=2
Q99816	TS101_HUMAN	-0.223315	-0.863565	-1.50651	-2.17281	-1.16788	-1.04896	-1.12346	-1.53583	-1.43348	-0.172392	0.92537	1.628	-0.437478	0.0225349	8	5	10	7	0.393207	-1.23064	0.000863901	1.62385	TS101_HUMAN Tumor susceptibility gene 101 protein OS=Homo sapiens GN=TSG101 PE=1 SV=2
C9JA93	C9JA93_HUMAN	-1.62787	-1.97437	-0.493481	-0.636609	-0.527414	-1.05058	-1.06806	-0.368856	-0.702864	0.834447	1.38724	0.340651	0.142764	0.719133	1	1	1	1	0.684846	-0.9389	0.000133274	1.62375	C9JA93_HUMAN TBC1 domain family member 15 (Fragment) OS=Homo sapiens GN=TBC1D15 PE=1 SV=1
Q8TE02	ELP5_HUMAN	-0.510361	-1.05595	-1.11728	0.31253	0.299957	0.625707	-2.0099	-2.9018	-1.77112	0.650031	0.695706	0.898328	0.341746	1.0154	1	1	1	1	0.720243	-0.903135	0.0122763	1.62338	ELP5_HUMAN Elongator complex protein 5 OS=Homo sapiens GN=ELP5 PE=1 SV=2
Q8WWH5	TRUB1_HUMAN	-1.8748	-1.00061	-1.41398	-0.498293	-0.747295	-0.961943	-0.567122	-0.727258	-0.85828	-0.103777	1.47065	1.18972	0.327197	0.427124	3	2	6	5	0.662183	-0.961065	0.000110975	1.62325	TRUB1_HUMAN Probable tRNA pseudouridine synthase 1 OS=Homo sapiens GN=TRUB1 PE=1 SV=1
Q92871	PMM1_HUMAN	-1.72587	-1.65004	-0.14544	0.478843	-0.61712	-0.773836	-0.818389	-2.14006	-1.43736	0.946544	1.23324	0.417835	-0.0313426	0.635757	2	2	4	1	0.640407	-0.98103	0.00196159	1.62144	PMM1_HUMAN Phosphomannomutase 1 OS=Homo sapiens GN=PMM1 PE=1 SV=2
P24666	PPAC_HUMAN	-1.43961	-1.80693	-0.104436	-0.60152	-0.45907	-0.591912	-1.77047	-1.52066	-1.35187	-0.337408	1.1788	-0.0157065	0.766953	1.14514	6	7	5	6	0.547555	-1.07183	0.000794458	1.61939	PPAC_HUMAN Low molecular weight phosphotyrosine protein phosphatase OS=Homo sapiens GN=ACP1 PE=1 SV=3
O94927	HAUS5_HUMAN	-1.03028	0.209743	-0.431423	-0.92537	0.174753	-0.141403	0.481674	-0.12236	0.00434693	1.11503	1.43222	2.58908	0.935225	1.02599	6	3	7	2	1.41951	-0.197813	0.000280669	1.61732	HAUS5_HUMAN HAUS augmin-like complex subunit 5 OS=Homo sapiens GN=HAUS5 PE=1 SV=2
Q9Y5A7	NUB1_HUMAN	-1.98375	-0.458695	1.08766	-0.66464	0.480365	0.176513	-0.614955	-0.862379	-0.565527	1.10163	2.18472	0.6341	1.24533	1.0283	7	7	7	7	1.23882	-0.378379	0.00323503	1.6172	NUB1_HUMAN NEDD8 ultimate buster 1 OS=Homo sapiens GN=NUB1 PE=1 SV=2
Q86TB9	PATL1_HUMAN	-1.68118	-0.021049	-1.56639	-0.82207	0.378704	0.646625	-0.00368317	-0.245441	-0.200228	0.116668	1.55134	2.44269	0.716915	1.30531	6	6	5	6	1.22658	-0.390523	0.00454443	1.61711	PATL1_HUMAN Protein PAT1 homolog 1 OS=Homo sapiens GN=PATL1 PE=1 SV=2
Q99471	PFD5_HUMAN	0.766041	-0.0971913	-1.56138	-0.856407	-1.97258	-1.63998	-1.80237	-2.23994	-2.27073	0.540556	0.655412	1.95734	-1.15304	-0.425533	8	4	2	2	0.314948	-1.29717	0.0208866	1.61212	PFD5_HUMAN Prefoldin subunit 5 OS=Homo sapiens GN=PFDN5 PE=1 SV=2
O43379	WDR62_HUMAN	-0.826437	-0.104326	-2.56284	0.537579	0.0938922	-0.0452444	-0.227273	-0.352945	0.393625	1	0.664984	2.23089	1.09364	1.34575	6	4	4	1	1.26705	-0.343774	0.00448342	1.61083	WDR62_HUMAN WD repeat-containing protein 62 OS=Homo sapiens GN=WDR62 PE=1 SV=4
O15397	IPO8_HUMAN	-0.608551	-1.07548	-1.40618	-1.02452	-0.527793	-0.664307	-0.709001	-0.954076	-0.919099	0.562963	1.08602	1.23445	0.521916	0.254808	8	12	12	10	0.732032	-0.876556	1.43208e-06	1.60859	IPO8_HUMAN Importin-8 OS=Homo sapiens GN=IPO8 PE=1 SV=2
Q9HD26	GOPC_HUMAN	-1.30461	-0.118124	0.877223	-1.46365	-0.180588	-0.535711	-0.363803	-0.395744	-0.0832267	0.826924	1.97123	1.1939	0.798217	1.26494	6	6	10	8	1.21104	-0.39647	0.000619833	1.60751	GOPC_HUMAN Golgi-associated PDZ and coiled-coil motif-containing protein OS=Homo sapiens GN=GOPC PE=1 SV=1
Q8TEQ6	GEMI5_HUMAN	-1.11966	-1.53569	-0.915925	-1.98725	0.428242	0.469991	0.659472	0.526166	0.83633	1.38038	1.18459	2.1855	0.752349	1.06553	38	31	35	36	1.31367	-0.293147	0.0098054	1.60682	GEMI5_HUMAN Gem-associated protein 5 OS=Homo sapiens GN=GEMIN5 PE=1 SV=3
Q99714	HCD2_HUMAN	-2.99982	-0.674238	-3.46861	-2.24986	-0.154491	-0.978333	-1.55386	-1.51639	-1.45603	-1.98559	-0.338134	0.616875	0.938163	0.427788	19	18	14	13	-0.06818	-1.6724	0.0231592	1.60422	HCD2_HUMAN 3-hydroxyacyl-CoA dehydrogenase type-2 OS=Homo sapiens GN=HSD17B10 PE=1 SV=3
Q6ZS17	FA65A_HUMAN	-0.752574	-2.44525	-0.0576292	-1.85479	-0.350834	-0.687464	-0.762788	-0.54711	0.0122809	0.450949	0.802542	1.4824	0.408226	0.731934	8	9	6	5	0.775209	-0.827351	0.00161896	1.60256	FA65A_HUMAN Protein FAM65A OS=Homo sapiens GN=FAM65A PE=1 SV=1
O60678	ANM3_HUMAN	0.985808	-2.6574	-1.7286	-1.48095	-0.217734	-0.369402	-0.267741	-0.438248	-0.783276	0.707056	0.690056	1.91301	0.457745	0.35642	8	13	11	14	0.824857	-0.77306	0.00976505	1.59792	ANM3_HUMAN Protein arginine N-methyltransferase 3 OS=Homo sapiens GN=PRMT3 PE=1 SV=3
Q13907	IDI1_HUMAN	-2.10447	0.239095	-2.69844	0.123951	0.680603	0.220479	-0.921446	-0.364156	0.167279	0.164921	0.891865	0.610033	2.11127	1.61517	6	10	4	6	1.07865	-0.517456	0.0188072	1.59611	IDI1_HUMAN Isopentenyl-diphosphate Delta-isomerase 1 OS=Homo sapiens GN=IDI1 PE=1 SV=2
P24844	MYL9_HUMAN	-3.21177	-0.765513	0.497102	-3.54641	0.493661	-0.352192	-0.715353	-0.789543	-0.547401	0.229496	0.306968	0.533616	1.19928	0.738008	10	3	3	4	0.601473	-0.993046	0.0345262	1.59452	MYL9_HUMAN Myosin regulatory light polypeptide 9 OS=Homo sapiens GN=MYL9 PE=1 SV=4
Q9Y692	GMEB1_HUMAN	-1.48398	0.849788	-0.378006	-1.13757	-0.341144	-0.914341	-0.430607	-0.775577	-0.805178	1.4516	1.82039	1.69191	-0.282267	0.266392	5	3	2	3	0.989605	-0.601846	0.00288085	1.59145	GMEB1_HUMAN Glucocorticoid modulatory element-binding protein 1 OS=Homo sapiens GN=GMEB1 PE=1 SV=2
Q9P215	POGK_HUMAN	-1.08529	0.625462	-1.64215	-0.258333	0.17974	0.117131	0.0884317	-0.450285	0.164611	0.430697	1.50714	1.26893	1.6723	1.81692	1	2	4	1	1.3392	-0.251188	0.00100952	1.59039	POGK_HUMAN Pogo transposable element with KRAB domain OS=Homo sapiens GN=POGK PE=1 SV=2
O00232	PSD12_HUMAN	-0.729443	-2.74894	-0.835149	-0.31963	-0.452914	-0.845309	-1.52415	-1.51157	-1.57125	0.0799927	0.417508	0.958723	0.2812	0.339227	26	13	14	19	0.41533	-1.17093	0.000841313	1.58626	PSD12_HUMAN 26S proteasome non-ATPase regulatory subunit 12 OS=Homo sapiens GN=PSMD12 PE=1 SV=3
Q9BRG1	VPS25_HUMAN	-0.221946	-0.773001	-1.92513	0.218244	-1.13828	-1.48886	-1.41918	-1.65926	-1.20883	0.668888	1.18323	1.43668	-0.402257	-0.300949	4	2	3	4	0.517118	-1.06847	0.00250129	1.58559	VPS25_HUMAN Vacuolar protein-sorting-associated protein 25 OS=Homo sapiens GN=VPS25 PE=1 SV=1
O75582	KS6A5_HUMAN	-2.19267	-0.101217	-0.258337	0.857245	0.492611	0.427933	-0.524905	-0.590712	-0.22211	0.549981	1.41815	1.40478	1.48907	1.86278	2	4	4	1	1.34495	-0.234684	0.00321848	1.57964	KS6A5_HUMAN Ribosomal protein S6 kinase alpha-5 OS=Homo sapiens GN=RPS6KA5 PE=1 SV=1
Q5HYK7	SH319_HUMAN	-0.45272	-0.751033	-1.39596	-0.989626	-0.311366	-0.562056	-0.151556	0.298727	-2.2393	0.564009	1.3598	1.90746	0.297656	0.127112	3	2	3	1	0.851208	-0.72832	0.00264384	1.57953	SH319_HUMAN SH3 domain-containing protein 19 OS=Homo sapiens GN=SH3D19 PE=1 SV=2
Q641Q2	FA21A_HUMAN	-1.12088	-1.7559	-1.89602	0.269112	-1.55637	-1.27658	-1.72126	-1.2303	-1.01787	1.25524	1.10582	1.67235	-1.49683	-0.924119	6	9	11	11	0.322492	-1.25623	0.0136642	1.57872	FA21A_HUMAN WASH complex subunit FAM21A OS=Homo sapiens GN=FAM21A PE=1 SV=3
Q08752	PPID_HUMAN	-1.69171	-1.44855	-1.02103	-1.65885	-0.591299	-0.719139	-1.36169	-1.46661	-1.6705	-0.5784	0.726409	0.766495	0.260487	0.242521	12	9	11	14	0.283503	-1.29215	5.25049e-05	1.57566	PPID_HUMAN Peptidyl-prolyl cis-trans isomerase D OS=Homo sapiens GN=PPID PE=1 SV=3
Q8IY22	CMIP_HUMAN	-0.866531	-0.172871	0.131046	-0.0656311	-0.665196	-0.580446	-0.794727	-0.885077	-0.57502	0.498355	1.01069	0.577649	1.47657	1.82438	1	3	2	3	1.07753	-0.497162	3.94587e-05	1.57469	CMIP_HUMAN C-Maf-inducing protein OS=Homo sapiens GN=CMIP PE=1 SV=3
O60443	DFNA5_HUMAN	0.541869	-0.100871	-0.0406357	-3.57038	-0.495401	-0.698916	-0.82542	-0.750648	-1.12219	0.956414	1.01207	0.877032	0.703723	0.373649	7	10	4	9	0.784578	-0.784732	0.0124467	1.56931	DFNA5_HUMAN Non-syndromic hearing impairment protein 5 OS=Homo sapiens GN=DFNA5 PE=1 SV=2
Q92995	UBP13_HUMAN	-1.26061	-0.579979	-0.903986	-1.50633	-0.107356	-0.284952	-0.924268	-0.646481	-0.550478	-0.180013	1.26449	1.61051	0.668176	0.706403	7	6	12	6	0.813914	-0.751604	0.000210627	1.56552	UBP13_HUMAN Ubiquitin carboxyl-terminal hydrolase 13 OS=Homo sapiens GN=USP13 PE=1 SV=2
Q8IY47	KBTB2_HUMAN	0.158127	-0.749291	-0.963528	-2.10428	-1.52458	-1.64103	-1.2649	-0.131401	0.0365006	0.863936	1.43735	1.50982	-0.464825	-0.0662697	1	2	2	1	0.656002	-0.909377	0.00551694	1.56538	KBTB2_HUMAN Kelch repeat and BTB domain-containing protein 2 OS=Homo sapiens GN=KBTBD2 PE=1 SV=2
Q96BF6	NACC2_HUMAN	-0.809089	0.0994984	-1.32267	-0.598223	0.253661	-0.0228433	0.620545	0.151364	0.175	1.5994	1.65306	-0.0189215	1.71747	2.06064	5	4	1	1	1.40233	-0.161417	0.00155487	1.56375	NACC2_HUMAN Nucleus accumbens-associated protein 2 OS=Homo sapiens GN=NACC2 PE=1 SV=1
Q9NYR9	KBRS2_HUMAN	-1.98078	-0.493123	-0.0989119	0.662902	0.255843	0.132205	0.415438	1.03418	-0.335461	1.46727	2.78074	1.11451	1.32395	0.905479	2	2	1	1	1.51839	-0.0453009	0.00537009	1.56369	KBRS2_HUMAN NF-kappa-B inhibitor-interacting Ras-like protein 2 OS=Homo sapiens GN=NKIRAS2 PE=1 SV=1
P18615	NELFE_HUMAN	-1.26743	0.553016	-0.985107	-0.890613	-0.287765	-0.437439	-0.282133	-0.368887	-0.400568	0.854261	1.46306	1.45787	0.825389	0.785787	11	11	10	14	1.07727	-0.485214	7.17828e-05	1.56249	NELFE_HUMAN Negative elongation factor E OS=Homo sapiens GN=NELFE PE=1 SV=3
Q13439	GOGA4_HUMAN	-1.95719	-0.45256	1.33088	-1.52951	-0.491725	-0.694385	-0.0483799	-0.383125	0.257687	0.582258	0.844745	1.62128	0.978961	1.57216	25	16	22	12	1.11988	-0.440924	0.00536791	1.56081	GOGA4_HUMAN Golgin subfamily A member 4 OS=Homo sapiens GN=GOLGA4 PE=1 SV=1
Q9NQW7	XPP1_HUMAN	-1.77977	-2.19992	-1.65901	-3.03016	-1.37479	-1.67194	-1.7217	-1.56071	-1.53483	-1.10706	0.297354	-0.335818	-0.364985	0.125058	12	9	10	11	-0.27709	-1.83698	0.0001569	1.55989	XPP1_HUMAN Xaa-Pro aminopeptidase 1 OS=Homo sapiens GN=XPNPEP1 PE=1 SV=3
Q86TC9	MYPN_HUMAN	-1.15928	-0.402441	0.714145	-0.706786	-0.414907	-0.216471	0.313814	-0.00527331	-0.318324	1.1796	1.62929	1.48233	0.920823	1.36396	6	7	6	5	1.3152	-0.243947	7.35104e-05	1.55915	MYPN_HUMAN Myopalladin OS=Homo sapiens GN=MYPN PE=1 SV=2
Q8NB46	ANR52_HUMAN	-1.24013	-0.642469	-0.627021	0.0855326	-0.485826	-0.714258	-0.341482	-0.411395	-0.123391	1.85707	1.58558	0.900385	0.240026	0.705776	4	4	1	2	1.05777	-0.500049	9.94097e-05	1.55782	ANR52_HUMAN Serine/threonine-protein phosphatase 6 regulatory ankyrin repeat subunit C OS=Homo sapiens GN=ANKRD52 PE=1 SV=3
Q9C0B1	FTO_HUMAN	-0.653175	-1.66261	0.17409	-2.18736	-2.07544	-1.97473	-1.37832	-0.886443	-1.17866	0.987709	2.12902	-0.00865191	-0.990796	-0.896648	6	8	7	4	0.244127	-1.31363	0.0154027	1.55775	FTO_HUMAN Alpha-ketoglutarate-dependent dioxygenase FTO OS=Homo sapiens GN=FTO PE=1 SV=3
Q86XL3	ANKL2_HUMAN	-2.22811	-0.617007	0.30145	-0.019548	0.122962	-0.0511199	0.0624161	-0.0834646	0.245981	1.02182	1.77081	1.69541	0.980606	1.05552	23	13	15	20	1.30483	-0.251827	0.00148376	1.55666	ANKL2_HUMAN Ankyrin repeat and LEM domain-containing protein 2 OS=Homo sapiens GN=ANKLE2 PE=1 SV=4
Q15058	KIF14_HUMAN	-0.551913	-0.848687	-0.679879	-0.120742	0.336246	0.430882	0.604257	0.350521	0.514935	1.88922	1.28582	1.73457	1.3352	1.54172	45	22	18	24	1.5573	0.00395786	9.21296e-05	1.55335	KIF14_HUMAN Kinesin-like protein KIF14 OS=Homo sapiens GN=KIF14 PE=1 SV=1
Q9BQI6	SLF1_HUMAN	-1.55925	-2.68954	-1.6626	-0.392254	0.203784	-0.326061	0.407967	0.931773	0.360033	1.52495	1.18695	1.08266	0.477759	0.861462	4	3	2	2	1.02675	-0.525129	0.0166479	1.55188	SLF1_HUMAN SMC5-SMC6 complex localization factor protein 1 OS=Homo sapiens GN=SLF1 PE=1 SV=2
Q6P474	PDXD2_HUMAN	-0.642423	-0.846817	-0.375088	-1.05177	-0.407445	-0.835777	-1.3451	-1.19332	-1.44683	0.284697	0.644562	1.01776	0.643335	0.638413	6	5	2	4	0.645753	-0.904953	3.99083e-06	1.55071	PDXD2_HUMAN Putative pyridoxal-dependent decarboxylase domain-containing protein 2 OS=Homo sapiens GN=PDXDC2P PE=5 SV=3
Q14CZ7	FAKD3_HUMAN	-0.701935	-1.22928	-1.42175	-2.19697	0.160577	-0.00311157	-0.200768	-1.19975	0.0806356	0.101652	0.867797	1.2127	0.986991	0.855263	6	3	3	2	0.804881	-0.745817	0.00206179	1.5507	FAKD3_HUMAN FAST kinase domain-containing protein 3, mitochondrial OS=Homo sapiens GN=FASTKD3 PE=1 SV=2
Q15370	ELOB_HUMAN	-2.0211	-0.605784	-0.968886	0.808141	-1.01945	-1.0952	-0.903744	-1.17745	-0.686188	2.15359	2.20738	0.302994	-0.685309	-0.487393	6	6	5	6	0.698254	-0.852186	0.017718	1.55044	ELOB_HUMAN Transcription elongation factor B polypeptide 2 OS=Homo sapiens GN=TCEB2 PE=1 SV=1
Q9Y3P9	RBGP1_HUMAN	-1.13787	-1.35811	-0.531822	-3.20116	-0.347867	-0.730562	-1.21294	-1.2002	-1.17035	0.137229	0.577725	0.881248	0.156335	-0.0515529	14	9	16	13	0.340197	-1.2101	0.0020011	1.55029	RBGP1_HUMAN Rab GTPase-activating protein 1 OS=Homo sapiens GN=RABGAP1 PE=1 SV=3
P52747	ZN143_HUMAN	-1.71598	-1.06954	-0.506953	-0.453704	0.516371	0.285167	0.140159	-0.492704	-0.483028	1.49386	1.95792	0.0398243	1.07291	1.08468	3	2	1	3	1.12984	-0.420024	0.00179271	1.54986	ZN143_HUMAN Zinc finger protein 143 OS=Homo sapiens GN=ZNF143 PE=1 SV=2
Q9H6E5	STPAP_HUMAN	-0.552685	-0.656265	-0.250391	-0.450537	0.258632	-0.231966	-0.752881	-1.46825	-1.10009	-0.417246	1.21341	1.07082	1.38845	1.60218	5	6	8	1	0.971524	-0.57827	0.000751424	1.54979	STPAP_HUMAN Speckle targeted PIP5K1A-regulated poly(A) polymerase OS=Homo sapiens GN=TUT1 PE=1 SV=2
P52735	VAV2_HUMAN	0.316336	0.743154	-0.13006	-2.80667	-0.621734	-0.702457	-0.896387	-0.652233	-0.440023	0.527739	0.901856	1.80774	0.557345	1.0705	3	7	7	1	0.973037	-0.576675	0.00736531	1.54971	VAV2_HUMAN Guanine nucleotide exchange factor VAV2 OS=Homo sapiens GN=VAV2 PE=1 SV=2
Q2M389	WASH7_HUMAN	0.00496244	-1.36729	-1.12603	0.164986	-1.45511	-1.74807	-1.00237	-0.433758	-0.378233	1.21939	1.1121	1.90712	-0.240145	-0.346499	10	4	8	8	0.730393	-0.815657	0.00444022	1.54605	WASH7_HUMAN WASH complex subunit SWIP OS=Homo sapiens GN=KIAA1033 PE=1 SV=2
Q6PIW4	FIGL1_HUMAN	-1.33776	-0.37496	-1.23529	-0.231694	0.47268	0.225789	0.924405	0.498714	0.132504	0.641954	1.5266	1.09998	1.82911	2.11355	3	6	4	4	1.44224	-0.102846	0.00226193	1.54509	FIGL1_HUMAN Fidgetin-like protein 1 OS=Homo sapiens GN=FIGNL1 PE=1 SV=2
O75792	RNH2A_HUMAN	-0.228519	-1.55175	0.943717	-1.58286	-0.623512	-0.737354	-1.71399	-1.73151	-2.18807	1.04759	1.68523	0.0777657	-0.000503067	-0.31874	8	5	3	2	0.498269	-1.04598	0.0118299	1.54425	RNH2A_HUMAN Ribonuclease H2 subunit A OS=Homo sapiens GN=RNASEH2A PE=1 SV=2
Q9Y3D0	MIP18_HUMAN	0.0864459	-0.168848	-1.08315	-0.945822	-1.19743	-1.33474	-1.59847	-1.4092	-1.31419	0.808604	1.29079	1.18233	-0.358165	-0.190746	2	4	3	4	0.546561	-0.996155	0.00109654	1.54272	MIP18_HUMAN Mitotic spindle-associated MMXD complex subunit MIP18 OS=Homo sapiens GN=FAM96B PE=1 SV=1
P78347	GTF2I_HUMAN	-1.77537	-0.0560763	-0.568961	-0.318466	1.07219	0.788926	0.913159	0.929511	0.87188	1.12156	2.57983	1.32514	1.83307	1.88554	57	40	38	46	1.74903	0.20631	0.00701798	1.54272	GTF2I_HUMAN General transcription factor II-I OS=Homo sapiens GN=GTF2I PE=1 SV=2
Q8WWN8	ARAP3_HUMAN	-1.26913	0.682334	-2.05371	0.550002	0.598902	0.972592	-0.133619	-0.456494	-0.498644	1.32373	1.60542	1.40211	1.34401	1.11467	2	6	1	2	1.35799	-0.178641	0.00599647	1.53663	ARAP3_HUMAN Arf-GAP with Rho-GAP domain, ANK repeat and PH domain-containing protein 3 OS=Homo sapiens GN=ARAP3 PE=1 SV=1
Q9Y5P4	C43BP_HUMAN	-1.65775	-1.7984	-0.172055	-1.47711	-0.496224	-0.676081	-0.22889	-1.00745	-0.857537	1.63372	-0.305719	1.24597	0.114024	0.339969	3	4	5	6	0.605593	-0.930166	0.00158568	1.53576	C43BP_HUMAN Collagen type IV alpha-3-binding protein OS=Homo sapiens GN=COL4A3BP PE=1 SV=1
P49585	PCY1A_HUMAN	-0.323966	0.0736771	-0.38685	-1.49674	-0.390204	-0.776137	-0.295761	-0.253711	0.00813551	0.816034	0.995939	2.18056	0.624388	0.916827	7	5	8	9	1.10675	-0.426839	0.000202909	1.53359	PCY1A_HUMAN Choline-phosphate cytidylyltransferase A OS=Homo sapiens GN=PCYT1A PE=1 SV=2
P11532	DMD_HUMAN	-1.08248	-1.44408	0.557572	-1.1991	0.269005	-0.0706005	-0.667878	-1.03866	-0.876051	-0.0701946	1.36152	1.11956	1.18523	0.986932	10	5	5	6	0.916607	-0.616919	0.00132156	1.53353	DMD_HUMAN Dystrophin OS=Homo sapiens GN=DMD PE=1 SV=3
Q9NVH2	INT7_HUMAN	-1.65053	-0.62391	-0.879332	-0.773262	0.718793	0.871882	0.5973	0.376867	0.600908	0.521609	1.69915	1.69653	1.63318	1.69091	12	16	7	8	1.44828	-0.0845868	0.00484315	1.53286	INT7_HUMAN Integrator complex subunit 7 OS=Homo sapiens GN=INTS7 PE=1 SV=1
Q9H9A6	LRC40_HUMAN	0.0239704	-1.39079	-1.0439	-1.26175	-0.5721	-0.693059	-1.56468	-1.69005	-1.42936	-0.3065	0.507125	1.3223	0.326582	0.446185	27	19	23	16	0.459139	-1.06908	0.000401294	1.52822	LRC40_HUMAN Leucine-rich repeat-containing protein 40 OS=Homo sapiens GN=LRRC40 PE=1 SV=1
Q8IW35	CEP97_HUMAN	-0.373905	0.33515	-1.06176	-0.679946	-0.671363	-0.801655	-0.078637	-0.65476	-0.00993039	1.0359	1.44549	1.97578	0.417083	0.533153	8	7	8	8	1.08148	-0.44409	0.000208397	1.52557	CEP97_HUMAN Centrosomal protein of 97 kDa OS=Homo sapiens GN=CEP97 PE=1 SV=1
Q9NX07	TSAP1_HUMAN	-0.71578	-0.66547	-0.619726	0.301433	-0.650714	-0.405644	-0.387604	-0.839691	-0.455527	0.213354	1.60489	0.892262	1.26056	1.18816	2	1	1	2	1.03185	-0.493191	2.13283e-05	1.52504	TSAP1_HUMAN tRNA selenocysteine 1-associated protein 1 OS=Homo sapiens GN=TRNAU1AP PE=1 SV=1
Q9UBU8	MO4L1_HUMAN	0.577112	-0.599099	-0.435495	-2.43857	0.53142	0.382944	0.224081	0.184542	0.026874	1.88177	1.12233	0.567593	1.49003	1.67323	9	9	6	7	1.34699	-0.171799	0.00628695	1.51879	MO4L1_HUMAN Mortality factor 4-like protein 1 OS=Homo sapiens GN=MORF4L1 PE=1 SV=2
Q96P48	ARAP1_HUMAN	-1.04182	-0.759307	-0.052467	-0.884424	-0.227947	-0.213282	-0.0546134	0.191741	0.0404526	0.927576	2.25693	1.53875	0.461295	0.73691	16	18	12	10	1.18429	-0.333519	0.000345364	1.51781	ARAP1_HUMAN Arf-GAP with Rho-GAP domain, ANK repeat and PH domain-containing protein 1 OS=Homo sapiens GN=ARAP1 PE=1 SV=3
O00418	EF2K_HUMAN	-0.63424	-0.0112381	-1.16045	0.660489	0.606461	0.321479	0.0998341	0.0580834	0.357994	0.591815	1.65229	0.836413	1.88294	2.78718	9	4	5	8	1.55013	0.033157	0.00215063	1.51697	EF2K_HUMAN Eukaryotic elongation factor 2 kinase OS=Homo sapiens GN=EEF2K PE=1 SV=2
Q9H0W9	CK054_HUMAN	-0.77144	-0.558114	-1.84543	0.813546	-1.61591	-1.4919	-2.0933	-2.00535	-2.28556	1.02057	1.18739	0.523304	-1.4807	-0.261733	1	1	2	1	0.197768	-1.31705	0.0212351	1.51482	CK054_HUMAN Ester hydrolase C11orf54 OS=Homo sapiens GN=C11orf54 PE=1 SV=1
O60671	RAD1_HUMAN	-1.70145	-0.268971	-0.862088	0.795929	-0.924669	-0.687222	-0.114609	-0.618946	0.0521377	2.1613	2.23501	0.348592	-0.247299	0.662137	4	1	2	3	1.03195	-0.481098	0.00851573	1.51305	RAD1_HUMAN Cell cycle checkpoint protein RAD1 OS=Homo sapiens GN=RAD1 PE=1 SV=1
Q5T8I3	F102B_HUMAN	-0.678194	-0.893324	0.73467	0.33905	0.431702	-0.0750022	-1.21589	-0.969251	-0.63579	1.19581	1.71679	0.656646	0.85363	1.4846	3	6	4	5	1.18149	-0.329115	0.000993828	1.51061	F102B_HUMAN Protein FAM102B OS=Homo sapiens GN=FAM102B PE=1 SV=2
O94887	FARP2_HUMAN	-1.46257	-0.532602	-1.18335	1.01096	0.307801	-0.328868	-0.888159	-0.401113	-0.850036	0.683351	1.33247	1.00854	0.940309	1.18152	7	5	4	2	1.02924	-0.480882	0.00113813	1.51012	FARP2_HUMAN FERM, RhoGEF and pleckstrin domain-containing protein 2 OS=Homo sapiens GN=FARP2 PE=1 SV=3
A0MZ66	SHOT1_HUMAN	-2.14132	0.234433	-1.36063	-1.22963	-0.476831	-0.375677	0.0260254	-0.0786247	-0.112848	-0.149189	0.852146	2.34411	0.573225	0.848221	31	20	24	26	0.893703	-0.612789	0.00701253	1.50649	SHOT1_HUMAN Shootin-1 OS=Homo sapiens GN=SHTN1 PE=1 SV=4
Q9H3K6	BOLA2_HUMAN	0.269986	-1.1394	-1.08237	-2.15716	-1.08535	-1.09956	-0.738431	-1.08487	-0.959903	0.645721	0.642753	1.30257	0.0424265	-0.157175	3	2	3	3	0.495258	-1.00856	0.000788542	1.50382	BOLA2_HUMAN BolA-like protein 2 OS=Homo sapiens GN=BOLA2 PE=1 SV=1
Q9P2R6	RERE_HUMAN	-1.25995	-1.97938	0.638052	-1.58062	0.541241	0.47838	0.104888	0.691028	0.808763	1.8809	2.30238	0.285442	0.84733	1.33464	1	1	3	1	1.33014	-0.173067	0.0210445	1.5032	RERE_HUMAN Arginine-glutamic acid dipeptide repeats protein OS=Homo sapiens GN=RERE PE=1 SV=2
Q5K651	SAMD9_HUMAN	-0.938475	-0.501371	-0.693053	-1.33656	0.378459	-0.0584972	-0.367189	-0.294002	-0.395462	0.637921	0.64025	2.13361	0.762562	1.0018	12	9	6	4	1.03523	-0.46735	0.000336005	1.50258	SAMD9_HUMAN Sterile alpha motif domain-containing protein 9 OS=Homo sapiens GN=SAMD9 PE=1 SV=1
Q9BY42	RTF2_HUMAN	-0.209895	0.0813077	-0.202312	-0.601292	-1.07678	-0.996542	-1.28167	-1.67834	-1.37679	1.89923	2.07977	0.683782	-0.516253	-0.715391	4	3	7	6	0.686227	-0.815813	0.0114705	1.50204	RTF2_HUMAN Protein RTF2 homolog OS=Homo sapiens GN=RTFDC1 PE=1 SV=3
Q99996	AKAP9_HUMAN	-0.765276	-0.50164	1.5444	-1.6779	-0.00931048	-0.0260222	0.106112	-0.34073	-0.423103	1.78972	0.914428	2.55133	-0.123311	1.19952	17	16	7	3	1.26634	-0.232608	0.0117596	1.49894	AKAP9_HUMAN A-kinase anchor protein 9 OS=Homo sapiens GN=AKAP9 PE=1 SV=3
Q5H9R7	PP6R3_HUMAN	-1.11023	-0.478421	0.413724	-1.11942	-0.615952	-0.430457	0.114266	-0.386901	0.120144	0.571488	1.68338	1.78909	0.553621	0.953994	15	17	19	19	1.11032	-0.388139	0.000399899	1.49845	PP6R3_HUMAN Serine/threonine-protein phosphatase 6 regulatory subunit 3 OS=Homo sapiens GN=PPP6R3 PE=1 SV=2
Q15048	LRC14_HUMAN	-0.781832	-0.802618	-1.30638	-0.701622	-0.833206	-0.774388	0.0782591	0.385628	0.00654202	1.50948	1.24682	1.83788	-0.129738	0.398462	8	5	2	1	0.972582	-0.525513	0.00139501	1.4981	LRC14_HUMAN Leucine-rich repeat-containing protein 14 OS=Homo sapiens GN=LRRC14 PE=2 SV=1
Q5VTB9	RN220_HUMAN	0.229098	0.811075	0.186864	-0.891228	-0.192913	-0.0730706	-1.17766	-0.918537	-1.55744	0.562622	1.32955	1.85228	0.952234	0.799258	1	1	2	2	1.09919	-0.398202	0.00230499	1.49739	RN220_HUMAN E3 ubiquitin-protein ligase RNF220 OS=Homo sapiens GN=RNF220 PE=1 SV=1
Q6ICB0	DESI1_HUMAN	-2.70908	-0.815532	-0.598752	-0.161805	0.116188	-0.530366	0.106607	-0.147719	-0.35528	1.11842	2.21048	1.02395	0.34541	-0.0480721	3	2	1	2	0.930038	-0.566194	0.00905735	1.49623	DESI1_HUMAN Desumoylating isopeptidase 1 OS=Homo sapiens GN=DESI1 PE=1 SV=1
Q9BSV6	SEN34_HUMAN	-0.242863	-1.63948	0.587652	-0.587998	0.115881	-0.21503	-0.454661	-0.258201	-0.255949	0.967599	1.91443	0.851015	0.774763	1.32972	5	3	5	3	1.16751	-0.32785	0.000435568	1.49536	SEN34_HUMAN tRNA-splicing endonuclease subunit Sen34 OS=Homo sapiens GN=TSEN34 PE=1 SV=1
Q9HAV4	XPO5_HUMAN	-0.72386	-1.93576	-1.33723	-2.30846	-0.677864	-0.880134	-0.856367	-1.16571	-1.18615	0.455961	1.13226	-0.392899	0.0833818	0.0382381	17	18	18	19	0.263389	-1.23017	0.000469166	1.49356	XPO5_HUMAN Exportin-5 OS=Homo sapiens GN=XPO5 PE=1 SV=1
Q8TDJ6	DMXL2_HUMAN	-0.208435	-0.307797	-1.06611	-0.361884	-0.549575	-0.396678	-0.457787	-0.434803	-0.177999	1.68896	0.476467	1.66385	0.894914	0.542674	3	4	1	2	1.05337	-0.440119	2.37203e-05	1.49349	DMXL2_HUMAN DmX-like protein 2 OS=Homo sapiens GN=DMXL2 PE=1 SV=2
Q5TAX3	TUT4_HUMAN	0.377781	0.603974	-1.27443	-1.38577	0.0178779	-0.566195	-0.705139	-0.234169	-0.520005	1.52315	1.27268	1.19795	0.601782	0.815095	3	6	2	2	1.08213	-0.409563	0.000722348	1.49169	TUT4_HUMAN Terminal uridylyltransferase 4 OS=Homo sapiens GN=ZCCHC11 PE=1 SV=3
O95835	LATS1_HUMAN	-2.16599	0.161741	0.37559	1.58569	0.30752	0.318799	-0.786206	-0.229618	-0.569773	1.92696	1.18202	0.404521	1.51302	1.87081	3	2	2	1	1.37947	-0.111361	0.0126586	1.49083	LATS1_HUMAN Serine/threonine-protein kinase LATS1 OS=Homo sapiens GN=LATS1 PE=1 SV=1
O75330	HMMR_HUMAN	-0.728216	-0.584438	-0.361464	-3.14426	-0.0692792	-0.222654	0.131162	-0.554994	-0.164491	0.755363	-0.0492317	2.05295	0.74667	0.776658	7	10	9	8	0.856481	-0.633181	0.0125954	1.48966	HMMR_HUMAN Hyaluronan mediated motility receptor OS=Homo sapiens GN=HMMR PE=1 SV=2
Q7Z5K2	WAPL_HUMAN	-1.7621	-0.824884	0.293766	-1.81959	0.679748	0.707473	0.231909	-0.145388	0.251942	0.432786	1.5608	0.629522	1.54835	1.94774	22	17	20	18	1.22384	-0.265236	0.0106465	1.48908	WAPL_HUMAN Wings apart-like protein homolog OS=Homo sapiens GN=WAPL PE=1 SV=1
Q86VI3	IQGA3_HUMAN	-0.178468	-0.351683	0.431089	-0.734504	-0.0112424	0.105804	0.380426	0.104899	0.526658	1.90929	1.01798	2.28088	1.02774	1.36029	24	22	21	14	1.51923	0.030331	8.86544e-05	1.4889	IQGA3_HUMAN Ras GTPase-activating-like protein IQGAP3 OS=Homo sapiens GN=IQGAP3 PE=1 SV=2
Q6P1J9	CDC73_HUMAN	-1.08028	-0.868362	-0.73501	-2.13447	0.351525	0.434044	0.189937	0.0581659	0.118094	0.994394	1.58446	0.620701	1.04848	1.12729	26	13	24	24	1.07507	-0.407374	0.00333066	1.48244	CDC73_HUMAN Parafibromin OS=Homo sapiens GN=CDC73 PE=1 SV=1
P59998	ARPC4_HUMAN	-0.0880758	-1.34045	-0.0210417	-1.16014	-0.865665	-1.01173	-2.08671	-1.4509	-2.17353	0.140936	1.50425	0.787003	-0.198356	-0.493694	8	3	6	5	0.348028	-1.13314	0.00485161	1.48117	ARPC4_HUMAN Actin-related protein 2/3 complex subunit 4 OS=Homo sapiens GN=ARPC4 PE=1 SV=3
Q96ER3	SAAL1_HUMAN	1.39899	-2.23904	-1.82843	-0.0837174	-1.48337	-1.40965	-0.971421	-1.5142	-1.64114	0.310931	1.16848	1.44713	-0.545545	-0.405559	6	7	6	5	0.395088	-1.08578	0.0257298	1.48086	SAAL1_HUMAN Protein SAAL1 OS=Homo sapiens GN=SAAL1 PE=1 SV=2
O96007	MOC2B_HUMAN	-0.623575	-0.336744	-1.37126	-0.0593985	-2.04245	-1.57334	-1.92942	-2.50031	-1.8042	0.420259	0.709713	1.56066	-1.34987	-0.738518	3	1	4	4	0.120448	-1.36008	0.0169867	1.48053	MOC2B_HUMAN Molybdopterin synthase catalytic subunit OS=Homo sapiens GN=MOCS2 PE=1 SV=1
O95677	EYA4_HUMAN	-0.280661	-2.15041	-1.53433	-0.784252	0.502888	0.755181	0.515263	0.65879	0.677699	1.00664	2.13704	1.14158	1.02744	1.16902	1	2	3	2	1.29634	-0.182203	0.0141692	1.47855	EYA4_HUMAN Eyes absent homolog 4 OS=Homo sapiens GN=EYA4 PE=1 SV=2
Q6P4I2	WDR73_HUMAN	-1.06647	-0.268578	-0.734614	-1.98919	-0.59954	-0.663329	-0.431388	-1.16318	-0.965029	0.289823	0.600249	2.10676	-0.0791799	0.0849701	1	2	3	2	0.600524	-0.875702	0.00165944	1.47623	WDR73_HUMAN WD repeat-containing protein 73 OS=Homo sapiens GN=WDR73 PE=1 SV=1
P41743	KPCI_HUMAN	-1.26349	-1.24509	-0.0158725	-0.142513	0.341205	-0.0517612	-0.0384457	-0.221408	0.0257636	1.2009	1.89263	0.509459	1.01338	1.31009	10	8	8	5	1.18529	-0.29018	0.000403908	1.47547	KPCI_HUMAN Protein kinase C iota type OS=Homo sapiens GN=PRKCI PE=1 SV=2
Q9UPN7	PP6R1_HUMAN	-1.05782	-0.927754	-1.61999	0.0201595	-0.681718	-0.803703	-0.488833	-1.48723	-0.589886	0.696593	0.988548	0.855129	0.280499	0.312728	4	8	6	8	0.626699	-0.848531	7.65739e-05	1.47523	PP6R1_HUMAN Serine/threonine-protein phosphatase 6 regulatory subunit 1 OS=Homo sapiens GN=PPP6R1 PE=1 SV=5
P57678	GEMI4_HUMAN	-1.43287	-0.744909	0.356399	-0.832319	0.378876	0.545076	0.322873	0.215375	0.417544	1.51115	1.02552	2.4059	0.878769	1.11934	26	14	16	16	1.38814	-0.0859949	0.00229058	1.47413	GEMI4_HUMAN Gem-associated protein 4 OS=Homo sapiens GN=GEMIN4 PE=1 SV=2
O75794	CD123_HUMAN	-2.77181	-1.94781	-0.504245	1.18594	0.262972	0.0482195	-0.108939	-0.361498	-0.285318	0.0184808	0.725673	1.11009	1.51167	1.48805	6	10	6	4	0.970792	-0.498054	0.0252285	1.46885	CD123_HUMAN Cell division cycle protein 123 homolog OS=Homo sapiens GN=CDC123 PE=1 SV=1
Q86X83	COMD2_HUMAN	-0.837725	-1.55086	-0.216479	1.51428	-0.072864	0.00271895	-1.94685	-1.90083	-1.87378	0.542259	1.96049	0.296966	0.139513	0.579705	3	1	7	2	0.703786	-0.764711	0.0274341	1.4685	COMD2_HUMAN COMM domain-containing protein 2 OS=Homo sapiens GN=COMMD2 PE=1 SV=2
Q13263	TIF1B_HUMAN	-1.11743	-0.125367	-1.82605	-1.74672	0.109653	-0.177077	-0.227736	-0.566452	-0.348356	0.24636	1.6126	0.670523	0.727511	0.728819	39	29	35	37	0.797163	-0.669505	0.00171487	1.46667	TIF1B_HUMAN Transcription intermediary factor 1-beta OS=Homo sapiens GN=TRIM28 PE=1 SV=5
Q9NVR0	KLH11_HUMAN	-1.08483	-0.802516	1.28322	1.1734	-0.380001	-0.371947	-0.426361	-0.473991	-1.26256	0.946041	1.20127	0.837881	1.47971	1.56206	1	2	1	1	1.20539	-0.26062	0.00470987	1.46601	KLH11_HUMAN Kelch-like protein 11 OS=Homo sapiens GN=KLHL11 PE=1 SV=1
Q9BZK3	NACP1_HUMAN	0.22298	-1.43873	-2.19218	0.993984	-0.552436	-0.270519	-1.14633	-1.98284	-1.48143	-0.177506	0.639033	2.67468	-0.321722	0.142832	1	1	1	1	0.591464	-0.871944	0.0361919	1.46341	NACP1_HUMAN Putative nascent polypeptide-associated complex subunit alpha-like protein OS=Homo sapiens GN=NACAP1 PE=5 SV=1
Q9NW68	BSDC1_HUMAN	0.389078	-0.730111	-2.37281	1.3612	-0.550338	-0.502907	-1.38661	-1.18903	-1.04978	1.55393	1.68679	0.766074	0.0593114	-0.104379	1	1	4	2	0.792345	-0.670147	0.0215963	1.46249	BSDC1_HUMAN BSD domain-containing protein 1 OS=Homo sapiens GN=BSDC1 PE=1 SV=1
O14879	IFIT3_HUMAN	-1.66667	-0.816125	-1.33138	-0.321577	0.00830767	-0.442611	-0.119186	-0.52712	0.0376307	0.17226	0.767562	1.39091	1.33486	0.767088	8	7	10	7	0.886536	-0.575414	0.000566782	1.46195	IFIT3_HUMAN Interferon-induced protein with tetratricopeptide repeats 3 OS=Homo sapiens GN=IFIT3 PE=1 SV=1
Q8TER5	ARH40_HUMAN	-1.52563	0.744019	-1.62737	-0.365943	0.312864	0.195052	0.174184	0.335057	0.717058	1.18141	1.69577	1.21392	0.961828	1.67159	15	10	13	7	1.3449	-0.115634	0.00446533	1.46054	ARH40_HUMAN Rho guanine nucleotide exchange factor 40 OS=Homo sapiens GN=ARHGEF40 PE=1 SV=3
Q92890	UFD1_HUMAN	-0.607046	-0.668511	1.01118	-1.18894	-1.94328	-1.97281	-0.792962	-1.19426	-0.92949	1.17311	0.671427	2.43525	-1.10043	-0.501346	10	7	6	7	0.535603	-0.920679	0.0324583	1.45628	UFD1_HUMAN Ubiquitin fusion degradation protein 1 homolog OS=Homo sapiens GN=UFD1L PE=1 SV=3
Q8NI35	INADL_HUMAN	-1.8156	-1.96333	0.331959	0.248012	0.306204	-0.170097	-0.60429	-0.606558	0.111036	0.360857	1.45854	1.14694	1.21202	0.766412	6	6	3	1	0.988955	-0.462518	0.00521174	1.45147	INADL_HUMAN InaD-like protein OS=Homo sapiens GN=PATJ PE=1 SV=3
O75179	ANR17_HUMAN	-0.357724	-0.367881	-1.0394	-1.69507	-0.0105595	-0.273302	-0.0421523	-0.41928	0.0142186	0.873689	0.917	2.09149	0.312154	0.728761	22	7	16	16	0.984619	-0.465683	0.000936401	1.4503	ANR17_HUMAN Ankyrin repeat domain-containing protein 17 OS=Homo sapiens GN=ANKRD17 PE=1 SV=3
Q9Y4B5	MTCL1_HUMAN	-1.12252	-0.267243	0.492753	-0.417311	0.272249	0.0996344	-0.0668872	-0.0356821	0.403164	1.25826	0.996311	2.14879	1.28685	1.1966	8	1	5	4	1.37736	-0.071316	0.000153704	1.44868	MTCL1_HUMAN Microtubule cross-linking factor 1 OS=Homo sapiens GN=MTCL1 PE=1 SV=5
Q9NWZ5	UCKL1_HUMAN	-1.11802	-0.0949487	-0.311921	0.174672	-0.00230568	-0.296541	-0.95673	-0.765691	-0.454637	0.455272	1.13566	0.506765	1.36478	1.6428	5	3	5	3	1.02106	-0.425125	0.000134494	1.44618	UCKL1_HUMAN Uridine-cytidine kinase-like 1 OS=Homo sapiens GN=UCKL1 PE=1 SV=2
Q9BVA1	TBB2B_HUMAN	-1.81946	-2.09467	-2.63412	-0.699558	0.188213	0.0942451	-0.516811	-0.629516	-0.403375	-1.60271	0.44569	1.14017	1.06747	1.41593	48	31	25	26	0.49331	-0.946117	0.0338387	1.43943	TBB2B_HUMAN Tubulin beta-2B chain OS=Homo sapiens GN=TUBB2B PE=1 SV=1
O00213	APBB1_HUMAN	-1.11049	0.432005	-0.0974471	-1.2876	0.0411769	-0.994375	-0.039302	0.226728	0.351271	1.11979	1.55879	1.76147	0.620548	0.751477	1	3	1	1	1.16242	-0.275336	0.0012648	1.43775	APBB1_HUMAN Amyloid beta A4 precursor protein-binding family B member 1 OS=Homo sapiens GN=APBB1 PE=1 SV=2
Q9H425	CA198_HUMAN	-1.86482	0.41505	-0.42417	0.428133	-0.362812	-0.601093	0.197542	0.0460369	-0.129471	0.294877	3.19648	0.992864	0.796967	0.631252	8	4	5	7	1.18249	-0.255067	0.0126997	1.43756	CA198_HUMAN Uncharacterized protein C1orf198 OS=Homo sapiens GN=C1orf198 PE=1 SV=1
O75446	SAP30_HUMAN	0.0948044	0.863538	-2.81287	-1.47419	0.170962	0.20127	-0.149499	0.00943738	0.0625055	-0.223929	1.07777	2.22286	0.841501	1.57531	1	4	2	1	1.0987	-0.337116	0.0304526	1.43582	SAP30_HUMAN Histone deacetylase complex subunit SAP30 OS=Homo sapiens GN=SAP30 PE=1 SV=1
Q9HCD6	TANC2_HUMAN	-1.45922	-0.165892	1.54161	0.308113	0.0859834	-0.110075	0.137279	-0.293801	-0.187645	1.64009	1.84684	0.932308	1.22869	1.44761	17	8	11	12	1.41911	-0.0159599	0.00221016	1.43507	TANC2_HUMAN Protein TANC2 OS=Homo sapiens GN=TANC2 PE=1 SV=3
Q6NYC1	JMJD6_HUMAN	-1.30429	-0.256127	-0.123332	-0.669818	-0.968541	-1.27647	-0.641344	-1.00069	-0.810961	-0.28559	1.36004	1.45221	-0.0268537	0.739949	4	3	5	4	0.647951	-0.783507	0.000676572	1.43146	JMJD6_HUMAN Bifunctional arginine demethylase and lysyl-hydroxylase JMJD6 OS=Homo sapiens GN=JMJD6 PE=1 SV=1
Q7Z3U7	MON2_HUMAN	0.755172	-1.81236	-0.447961	-1.9065	-0.954343	-0.894874	-1.6399	-1.24501	-0.990221	-0.85955	0.695157	2.60562	-0.0920324	-0.27064	11	5	8	5	0.41571	-1.01511	0.0276232	1.43082	MON2_HUMAN Protein MON2 homolog OS=Homo sapiens GN=MON2 PE=1 SV=3
P49815	TSC2_HUMAN	-1.61144	0.231653	0.454066	-0.718062	0.420994	0.281463	-0.326354	-0.0664201	0.431793	0.588954	2.07	2.98289	0.586529	0.408237	4	7	6	3	1.32732	-0.100256	0.0122695	1.42758	TSC2_HUMAN Tuberin OS=Homo sapiens GN=TSC2 PE=1 SV=2
Q5TAQ9	DCAF8_HUMAN	-1.73103	0.0125175	0.53002	-0.333974	-0.372031	-0.464015	-0.393642	-0.574303	0.0479111	0.541444	1.3544	1.25006	0.949924	1.21939	5	1	4	5	1.06304	-0.364283	0.000462261	1.42733	DCAF8_HUMAN DDB1- and CUL4-associated factor 8 OS=Homo sapiens GN=DCAF8 PE=1 SV=1
C9J0J7	C9J0J7_HUMAN	0.163214	-1.42626	-0.583476	-1.11346	-1.0285	-1.1708	-1.64733	-1.71288	-1.73858	0.961002	1.15631	1.02918	-0.751468	-0.979192	1	1	3	2	0.283166	-1.13979	0.0072324	1.42295	C9J0J7_HUMAN Profilin OS=Homo sapiens GN=PFN2 PE=1 SV=1
Q14353	GAMT_HUMAN	-1.46007	-2.36556	-0.686501	-0.0697723	0.286847	0.465761	0.491727	0.0681463	-0.602962	0.840923	2.36079	0.997388	0.355671	0.402594	1	2	2	1	0.991472	-0.430265	0.0166819	1.42174	GAMT_HUMAN Guanidinoacetate N-methyltransferase OS=Homo sapiens GN=GAMT PE=1 SV=1
Q9NW82	WDR70_HUMAN	-1.15374	-1.14133	-1.09689	-0.750812	-0.141486	0.150827	0.102236	0.154024	0.206219	1.36358	2.68978	-0.0873315	0.561307	0.534543	10	8	14	14	1.01238	-0.407883	0.00764126	1.42026	WDR70_HUMAN WD repeat-containing protein 70 OS=Homo sapiens GN=WDR70 PE=1 SV=1
Q9NZJ4	SACS_HUMAN	-0.747295	-0.902016	-0.62307	-0.944465	0.412823	0.995327	0.541018	0.717879	0.279835	0.894179	0.854016	1.98336	1.52957	1.65812	23	23	7	1	1.38385	-0.029996	0.00310178	1.41385	SACS_HUMAN Sacsin OS=Homo sapiens GN=SACS PE=1 SV=2
P61077	UB2D3_HUMAN	-0.199975	-2.59709	-1.81583	-0.284411	-2.33727	-1.8194	-0.943296	-0.47059	-0.486996	-0.0233584	0.249177	0.708514	-0.227632	0.267825	3	2	1	3	0.194905	-1.21721	0.00744446	1.41211	UB2D3_HUMAN Ubiquitin-conjugating enzyme E2 D3 OS=Homo sapiens GN=UBE2D3 PE=1 SV=1
Q9BQE5	APOL2_HUMAN	-1.2109	-0.859832	-2.14377	-0.555774	0.0604197	-0.478442	-0.0829371	-0.381808	0.0895038	0.828625	0.379402	1.26776	0.78204	0.711113	11	2	8	9	0.793787	-0.618171	0.0013509	1.41196	APOL2_HUMAN Apolipoprotein L2 OS=Homo sapiens GN=APOL2 PE=1 SV=1
P27707	DCK_HUMAN	-2.89901	-0.881683	0.475897	0.571612	-0.0148025	-0.247572	0.0407236	-0.396802	0.08715	-0.952029	0.944516	1.57152	1.88994	1.78712	2	7	6	5	1.04821	-0.362721	0.0390702	1.41094	DCK_HUMAN Deoxycytidine kinase OS=Homo sapiens GN=DCK PE=1 SV=1
P62195	PRS8_HUMAN	-0.979414	-2.48847	0.16208	-1.80629	-0.958477	-1.05937	-1.58615	-1.57907	-1.53006	-0.420242	0.0999058	1.54703	-0.398767	-0.346017	23	21	23	27	0.0963827	-1.31392	0.00651333	1.4103	PRS8_HUMAN 26S protease regulatory subunit 8 OS=Homo sapiens GN=PSMC5 PE=1 SV=1
Q96JG6	VPS50_HUMAN	-0.937958	-1.01236	-1.04444	-1.86766	-0.10046	-0.44968	-1.6378	-1.49892	-1.93875	0.340482	0.252209	0.751521	0.0408421	-0.171324	1	12	8	2	0.242746	-1.16534	0.000630163	1.40808	VPS50_HUMAN Syndetin OS=Homo sapiens GN=VPS50 PE=1 SV=3
P04632	CPNS1_HUMAN	0.389856	-1.66954	-2.76087	-1.75733	-1.82451	-1.78535	-2.53492	-2.87887	-2.64924	0.0932403	0.0682757	0.486832	-1.84143	-1.47562	8	6	9	9	-0.533741	-1.9412	0.0287219	1.40746	CPNS1_HUMAN Calpain small subunit 1 OS=Homo sapiens GN=CAPNS1 PE=1 SV=1
Q3T8J9	GON4L_HUMAN	-1.14258	0.363325	-0.542728	-0.47676	1.09887	0.771702	-0.0982746	-0.372827	0.188132	0.559652	1.59665	0.994123	2.03757	1.71445	6	6	3	2	1.38049	-0.0234603	0.00268102	1.40395	GON4L_HUMAN GON-4-like protein OS=Homo sapiens GN=GON4L PE=1 SV=1
P26440	IVD_HUMAN	-2.61394	-0.426336	-1.40982	-0.85033	-0.0181393	-0.88727	-0.86159	-1.04075	-0.755418	0.071938	0.1865	0.526037	0.657753	0.65049	7	3	4	6	0.418544	-0.984843	0.00142156	1.40339	IVD_HUMAN Isovaleryl-CoA dehydrogenase, mitochondrial OS=Homo sapiens GN=IVD PE=1 SV=1
O75175	CNOT3_HUMAN	-0.83726	-0.954112	0.17252	-0.698577	-0.97838	-0.670265	-0.15596	-0.250575	-0.515094	0.976367	1.33786	2.20417	-0.203432	-0.0167531	6	2	9	7	0.859643	-0.543078	0.00240861	1.40272	CNOT3_HUMAN CCR4-NOT transcription complex subunit 3 OS=Homo sapiens GN=CNOT3 PE=1 SV=1
Q96GA3	LTV1_HUMAN	-1.03747	-0.799949	0.397936	-1.73745	0.221264	0.0939254	0.542475	0.264291	0.358177	1.31378	2.01007	1.20609	0.814379	0.723381	6	8	5	7	1.21354	-0.188533	0.00433196	1.40207	LTV1_HUMAN Protein LTV1 homolog OS=Homo sapiens GN=LTV1 PE=1 SV=1
P62380	TBPL1_HUMAN	-0.963603	-0.337586	-0.359571	-0.224953	-0.311237	-0.49599	-1.8532	-1.94562	-1.46848	-0.100533	0.628211	0.669299	0.519189	0.870447	2	2	2	2	0.517323	-0.88447	0.0013945	1.40179	TBPL1_HUMAN TATA box-binding protein-like protein 1 OS=Homo sapiens GN=TBPL1 PE=1 SV=1
Q86YV9	HPS6_HUMAN	-1.30563	-0.0864044	-1.87756	1.42707	0.200028	0.630188	-0.26706	-0.514349	-0.260023	0.289494	1.67054	2.07139	0.616328	1.21992	3	5	3	5	1.17353	-0.228193	0.0165933	1.40173	HPS6_HUMAN Hermansky-Pudlak syndrome 6 protein OS=Homo sapiens GN=HPS6 PE=1 SV=1
Q9BZF9	UACA_HUMAN	0.711896	-0.0200354	1.25559	-1.07827	0.546721	1.13954	-0.0304031	-0.107183	0.348699	2.68232	1.29842	1.60369	1.23592	1.70998	44	13	23	9	1.70607	0.307396	0.00297355	1.39867	UACA_HUMAN Uveal autoantigen with coiled-coil domains and ankyrin repeats OS=Homo sapiens GN=UACA PE=1 SV=2
Q5VTU3	Q5VTU3_HUMAN	-1.90509	-2.39802	-0.786682	-0.669856	-0.58458	-0.513885	-0.23467	0.00472025	0.0238798	1.22469	2.21536	1.08061	-0.971939	-0.49008	1	1	1	1	0.611728	-0.78491	0.0301514	1.39664	Q5VTU3_HUMAN Dynein light chain Tctex-type 1 OS=Homo sapiens GN=DYNLT1 PE=1 SV=1
Q86UU1	PHLB1_HUMAN	-1.85143	-0.867713	0.863702	0.848025	0.0734022	-0.0594298	0.0574966	-0.0195778	0.516932	1.20255	1.34967	1.60336	1.17949	1.40019	11	9	4	11	1.34705	-0.0487329	0.00412699	1.39579	PHLB1_HUMAN Pleckstrin homology-like domain family B member 1 OS=Homo sapiens GN=PHLDB1 PE=1 SV=1
Q96CG3	TIFA_HUMAN	-2.3877	-0.08375	-0.418372	-0.973657	-0.173375	-0.294712	0.0487312	-0.0825445	-0.198988	0.792214	1.60387	1.07123	-0.0240449	0.997543	1	2	1	1	0.888163	-0.507152	0.00426953	1.39531	TIFA_HUMAN TRAF-interacting protein with FHA domain-containing protein A OS=Homo sapiens GN=TIFA PE=1 SV=1
Q9Y6Y0	NS1BP_HUMAN	0.388841	-0.00337307	-0.848077	-1.41773	-0.261354	-0.550789	-0.861022	-0.95846	-0.99702	-0.53197	0.812294	2.51411	0.39455	0.724908	2	4	3	5	0.782778	-0.61211	0.00790095	1.39489	NS1BP_HUMAN Influenza virus NS1A-binding protein OS=Homo sapiens GN=IVNS1ABP PE=1 SV=3
Q9H0U9	TSYL1_HUMAN	0.388833	0.0343599	-0.706025	-2.0812	0.325162	0.0117173	0.0599457	-0.306422	-0.119264	1.82734	0.910569	0.646181	1.10172	1.15848	9	7	5	4	1.12886	-0.265877	0.00276755	1.39473	TSYL1_HUMAN Testis-specific Y-encoded-like protein 1 OS=Homo sapiens GN=TSPYL1 PE=1 SV=3
O14907	TX1B3_HUMAN	-0.969237	-0.649464	-0.232779	-1.06708	-0.114117	0.190151	-0.746859	-0.881783	-0.628996	0.415819	0.856013	1.69643	0.497606	0.659304	2	1	4	3	0.825034	-0.566684	0.000145417	1.39172	TX1B3_HUMAN Tax1-binding protein 3 OS=Homo sapiens GN=TAX1BP3 PE=1 SV=2
Q5VTR2	BRE1A_HUMAN	-1.49619	-0.0234831	0.944333	-1.56861	0.0162285	0.0798733	-0.0327831	-0.173967	0.0273595	0.264581	0.997181	1.68317	1.17471	1.59803	33	19	28	21	1.14353	-0.247471	0.00505593	1.39101	BRE1A_HUMAN E3 ubiquitin-protein ligase BRE1A OS=Homo sapiens GN=RNF20 PE=1 SV=2
Q9H0W8	SMG9_HUMAN	-1.29808	0.431414	-1.99017	0.492129	0.0185822	0.124796	0.262219	0.127644	0.111982	2.06692	1.57637	1.04959	0.531996	0.766541	2	4	6	6	1.19828	-0.191054	0.00806955	1.38934	SMG9_HUMAN Protein SMG9 OS=Homo sapiens GN=SMG9 PE=1 SV=1
Q53EL6	PDCD4_HUMAN	1.67672	-1.72956	0.0632861	-0.571434	0.171293	0.105296	-0.819575	-1.03835	-0.880634	1.02253	2.26399	0.827808	0.236677	0.911038	6	6	8	10	1.05241	-0.335884	0.0178687	1.38829	PDCD4_HUMAN Programmed cell death protein 4 OS=Homo sapiens GN=PDCD4 PE=1 SV=2
P52739	ZN131_HUMAN	-2.29439	-0.475148	0.435628	0.75932	1.04922	0.993621	0.426498	0.751385	0.663834	1.39025	3.14317	-0.297117	2.09559	1.87665	3	5	4	3	1.64171	0.256664	0.0480667	1.38504	ZN131_HUMAN Zinc finger protein 131 OS=Homo sapiens GN=ZNF131 PE=1 SV=2
Q9UHI6	DDX20_HUMAN	-1.46672	-0.602619	-1.81201	-0.298697	0.842386	0.703614	0.59506	0.210476	0.50619	0.186857	0.802446	2.41619	1.30311	1.47664	20	14	13	18	1.23705	-0.146925	0.0200846	1.38397	DDX20_HUMAN Probable ATP-dependent RNA helicase DDX20 OS=Homo sapiens GN=DDX20 PE=1 SV=2
Q8WV41	SNX33_HUMAN	-1.93853	-0.183378	1.2657	-0.808189	0.457471	0.0887938	-0.179265	-0.14922	0.00113894	0.990427	2.80668	0.311048	1.07701	0.928008	2	4	3	2	1.22264	-0.160608	0.0168255	1.38324	SNX33_HUMAN Sorting nexin-33 OS=Homo sapiens GN=SNX33 PE=1 SV=1
Q6Q0C0	TRAF7_HUMAN	-0.341995	-0.165044	-1.87062	0.0535484	0.370923	0.251536	-0.845563	-0.86192	-1.20962	0.768796	0.884144	0.865791	0.934184	0.886912	3	2	4	3	0.867965	-0.513196	0.00151673	1.38116	TRAF7_HUMAN E3 ubiquitin-protein ligase TRAF7 OS=Homo sapiens GN=TRAF7 PE=1 SV=1
O75190	DNJB6_HUMAN	-1.03581	-0.192326	1.57822	-1.19221	0.963801	0.876825	0.768147	0.431035	0.939533	2.908	2.13903	0.300881	1.66967	1.62753	6	4	8	5	1.72902	0.348579	0.0233444	1.38044	DNJB6_HUMAN DnaJ homolog subfamily B member 6 OS=Homo sapiens GN=DNAJB6 PE=1 SV=2
Q9Y613	FHOD1_HUMAN	-0.980013	-0.982521	-0.0437825	-2.30766	-0.0850616	-0.278677	0.144178	1.0048	0.553281	0.341578	1.09486	1.79309	1.07346	0.946104	14	11	10	8	1.04982	-0.330606	0.0134021	1.38042	FHOD1_HUMAN FH1/FH2 domain-containing protein 1 OS=Homo sapiens GN=FHOD1 PE=1 SV=3
Q15365	PCBP1_HUMAN	-0.720686	-0.352099	-1.20773	-0.975917	-0.314947	-0.304114	-0.206711	-0.904188	-0.233261	0.502493	1.60884	1.22514	0.0542859	0.602077	17	21	21	17	0.798567	-0.579961	0.000202065	1.37853	PCBP1_HUMAN Poly(rC)-binding protein 1 OS=Homo sapiens GN=PCBP1 PE=1 SV=2
Q96RE7	NACC1_HUMAN	-0.849064	-0.656406	0.603341	-1.15866	0.213815	-0.248885	-0.364324	-0.970847	-0.207904	0.663304	0.687382	1.62851	1.0396	0.849264	4	8	7	6	0.973611	-0.404326	0.000468674	1.37794	NACC1_HUMAN Nucleus accumbens-associated protein 1 OS=Homo sapiens GN=NACC1 PE=1 SV=1
Q9NZJ0	DTL_HUMAN	-1.01394	-1.3481	0.324952	0.506275	0.242178	-0.248247	0.245042	0.44017	0.0788738	2.64167	1.80675	0.274743	0.841165	0.893034	2	1	5	2	1.29147	-0.0858657	0.00719305	1.37734	DTL_HUMAN Denticleless protein homolog OS=Homo sapiens GN=DTL PE=1 SV=3
Q9NZQ3	SPN90_HUMAN	0.232502	-0.953057	0.693506	-1.65859	0.0185835	-0.414973	-0.294246	0.00424204	-0.286025	1.61455	1.01828	1.22006	0.772632	0.751507	5	9	5	2	1.07541	-0.29534	0.00141092	1.37075	SPN90_HUMAN NCK-interacting protein with SH3 domain OS=Homo sapiens GN=NCKIPSD PE=1 SV=1
Q08379	GOGA2_HUMAN	-1.04908	0.662062	-0.613743	-1.22211	0.467541	-0.358981	-0.692262	-0.814376	-0.167124	0.357972	0.438369	1.11735	1.35815	1.47189	39	17	28	21	0.948746	-0.420897	0.00161092	1.36964	GOGA2_HUMAN Golgin subfamily A member 2 OS=Homo sapiens GN=GOLGA2 PE=1 SV=3
Q6IBW4	CNDH2_HUMAN	-0.803562	-0.0925793	-1.49855	-1.96475	0.179684	-0.139035	0.270472	-0.0969073	-0.0502858	0.386691	1.30772	2.11179	0.396041	0.301794	7	8	9	7	0.900807	-0.466168	0.00901787	1.36698	CNDH2_HUMAN Condensin-2 complex subunit H2 OS=Homo sapiens GN=NCAPH2 PE=1 SV=1
Q9NT62	ATG3_HUMAN	0.354267	-1.74061	-1.17714	-2.77136	-1.40977	-1.73143	-1.05135	-2.21107	-2.43272	-0.983988	0.995669	0.882993	-1.08681	-0.848687	8	4	7	6	-0.208165	-1.57458	0.0263019	1.36641	ATG3_HUMAN Ubiquitin-like-conjugating enzyme ATG3 OS=Homo sapiens GN=ATG3 PE=1 SV=1
P42773	CDN2C_HUMAN	-1.35035	0.786088	-0.602031	-0.0610576	-0.479296	-0.516949	-0.402886	-0.321823	-0.318516	0.263159	1.43052	1.4542	0.599135	1.26849	6	2	4	4	1.0031	-0.36298	0.000808587	1.36608	CDN2C_HUMAN Cyclin-dependent kinase 4 inhibitor C OS=Homo sapiens GN=CDKN2C PE=1 SV=1
Q15751	HERC1_HUMAN	-1.69481	0.0911411	0.616879	-0.332323	-0.40619	-0.340907	-0.327143	-0.202183	-0.455988	0.24347	0.517602	3.2532	0.221983	0.897852	11	6	9	2	1.02682	-0.339058	0.0173803	1.36588	HERC1_HUMAN Probable E3 ubiquitin-protein ligase HERC1 OS=Homo sapiens GN=HERC1 PE=1 SV=2
Q13049	TRI32_HUMAN	-1.32121	-0.623397	-0.132302	-0.670565	0.285043	0.185462	0.90635	0.71648	0.832588	1.2856	2.43308	2.00775	0.427577	0.769686	8	10	7	5	1.38474	0.019828	0.00938754	1.36491	TRI32_HUMAN E3 ubiquitin-protein ligase TRIM32 OS=Homo sapiens GN=TRIM32 PE=1 SV=2
P47712	PA24A_HUMAN	-1.45934	-0.644567	-0.0418654	-1.67577	-1.11394	-1.25367	-2.15543	-2.28925	-1.80613	-1.9615	0.783325	1.89788	-0.355568	-0.455603	22	17	18	23	-0.018294	-1.38222	0.03387	1.36393	PA24A_HUMAN Cytosolic phospholipase A2 OS=Homo sapiens GN=PLA2G4A PE=1 SV=2
P31749	AKT1_HUMAN	-1.74176	0.236654	1.24888	-0.417313	0.170107	-0.220103	0.183491	-0.0723669	0.173328	-0.0828088	2.11705	1.20673	1.59186	1.73659	6	4	7	4	1.31388	-0.0487869	0.0105065	1.36267	AKT1_HUMAN RAC-alpha serine/threonine-protein kinase OS=Homo sapiens GN=AKT1 PE=1 SV=2
Q15435	PP1R7_HUMAN	0.279993	-0.989013	-1.37686	-0.472024	-1.88233	-1.96227	-1.79914	-1.61318	-1.94979	-0.110373	0.610724	1.86082	-1.03117	-1.05467	5	2	8	8	0.0550639	-1.30718	0.0245592	1.36224	PP1R7_HUMAN Protein phosphatase 1 regulatory subunit 7 OS=Homo sapiens GN=PPP1R7 PE=1 SV=1
P50225	ST1A1_HUMAN	0.254051	-0.103841	-0.699878	-0.718121	0.688221	0.231317	0.0616272	-0.921914	0.146779	-0.3471	2.15893	1.64468	1.56765	1.19405	3	3	2	2	1.24364	-0.117973	0.00477047	1.36161	ST1A1_HUMAN Sulfotransferase 1A1 OS=Homo sapiens GN=SULT1A1 PE=1 SV=3
P06493	CDK1_HUMAN	-1.99546	-1.0954	2.22398	-0.178526	-0.137075	-0.467396	-0.834758	-1.30013	-0.911752	0.270146	1.41168	0.425351	0.971252	1.11735	19	16	15	19	0.839156	-0.521836	0.0316328	1.36099	CDK1_HUMAN Cyclin-dependent kinase 1 OS=Homo sapiens GN=CDK1 PE=1 SV=3
Q9UKD1	GMEB2_HUMAN	-1.11921	0.550848	-2.23158	-0.840959	-0.00330248	-0.0474505	1.4601	1.72673	0.890159	1.05452	1.26331	2.1295	0.903027	1.66487	2	2	3	1	1.40305	0.042815	0.0441567	1.36023	GMEB2_HUMAN Glucocorticoid modulatory element-binding protein 2 OS=Homo sapiens GN=GMEB2 PE=1 SV=1
Q8IWV8	UBR2_HUMAN	0.0455197	-1.03319	0.0372618	-2.55834	0.0201711	-0.537846	-0.184709	0.00851446	0.0357079	1.26287	0.988226	1.42894	0.481486	0.321968	2	7	6	3	0.896699	-0.462989	0.00755669	1.35969	UBR2_HUMAN E3 ubiquitin-protein ligase UBR2 OS=Homo sapiens GN=UBR2 PE=1 SV=1
O75676	KS6A4_HUMAN	-1.30218	-0.798602	1.19756	-0.0828914	0.471489	0.433038	0.194138	-0.458374	0.200633	1.14901	1.33253	0.179861	1.75242	2.302	10	7	9	13	1.34317	-0.016132	0.00759403	1.3593	KS6A4_HUMAN Ribosomal protein S6 kinase alpha-4 OS=Homo sapiens GN=RPS6KA4 PE=1 SV=1
O14908	GIPC1_HUMAN	-1.46394	0.257903	0.272284	-1.58403	0.395499	-0.31276	-0.517855	-0.814912	-0.384301	0.810327	0.895818	0.450438	1.28039	1.04673	14	8	12	12	0.896739	-0.461345	0.0019707	1.35808	GIPC1_HUMAN PDZ domain-containing protein GIPC1 OS=Homo sapiens GN=GIPC1 PE=1 SV=2
Q9NP97	DLRB1_HUMAN	-0.772508	0.151295	-0.839163	-0.804498	-2.25414	-2.3098	-2.71812	-2.77777	-2.86479	0.39705	0.557883	0.442468	-1.5633	-1.49242	2	2	4	4	-0.331664	-1.68772	0.0493984	1.35606	DLRB1_HUMAN Dynein light chain roadblock-type 1 OS=Homo sapiens GN=DYNLRB1 PE=1 SV=3
Q96T51	RUFY1_HUMAN	-0.328756	-0.393904	0.0294973	-0.028663	-0.848491	-1.11846	-1.34582	-1.8629	-1.58313	0.272281	1.1525	0.524374	0.275101	0.388566	11	3	10	9	0.522565	-0.83118	0.00165847	1.35374	RUFY1_HUMAN RUN and FYVE domain-containing protein 1 OS=Homo sapiens GN=RUFY1 PE=1 SV=2
Q6P2H3	CEP85_HUMAN	-2.20693	0.24301	0.470522	0.5863	-0.13651	0.104759	0.838128	0.192913	1.08682	2.45601	1.58963	1.08987	0.815119	1.47166	10	4	10	6	1.48446	0.131001	0.0152992	1.35346	CEP85_HUMAN Centrosomal protein of 85 kDa OS=Homo sapiens GN=CEP85 PE=1 SV=1
Q9UK39	NOCT_HUMAN	-1.39021	-1.15311	0.463728	-0.193379	0.667053	0.697972	0.195208	-0.00691913	-0.359909	0.946814	2.46652	0.939703	0.823245	0.990871	1	3	1	1	1.23343	-0.119951	0.00608536	1.35338	NOCT_HUMAN Nocturnin OS=Homo sapiens GN=NOCT PE=2 SV=2
O15357	SHIP2_HUMAN	-0.0374722	-0.45435	-0.795649	-1.43958	-0.81536	-0.977069	-1.1563	-0.929072	-0.964253	0.229483	0.487237	1.71694	0.124676	0.00283245	15	7	14	14	0.512234	-0.841012	0.00054137	1.35325	SHIP2_HUMAN Phosphatidylinositol 3,4,5-trisphosphate 5-phosphatase 2 OS=Homo sapiens GN=INPPL1 PE=1 SV=2
Q92616	GCN1_HUMAN	-0.655161	-1.18923	-1.75749	-2.34414	-0.212037	-0.588374	-0.759031	-0.949886	-0.658687	-0.558414	0.227214	0.830498	0.681197	0.521586	101	67	67	64	0.340416	-1.01267	0.00222105	1.35309	GCN1_HUMAN eIF-2-alpha kinase activator GCN1 OS=Homo sapiens GN=GCN1 PE=1 SV=6
Q13200	PSMD2_HUMAN	-0.541931	-2.84377	-0.959752	-1.54621	-1.16501	-1.62621	-1.88417	-1.86001	-1.9316	0.0931444	-0.449012	0.120367	-0.595927	-0.38259	35	28	32	26	-0.242804	-1.59541	0.00118465	1.3526	PSMD2_HUMAN 26S proteasome non-ATPase regulatory subunit 2 OS=Homo sapiens GN=PSMD2 PE=1 SV=3
P54652	HSP72_HUMAN	-0.439039	-0.823119	-0.176375	0.635826	-0.420527	-1.0099	-0.655465	-1.44241	-0.801354	1.72641	1.36631	1.9752	-0.414695	-0.762318	9	8	6	6	0.778181	-0.570263	0.0172554	1.34844	HSP72_HUMAN Heat shock-related 70 kDa protein 2 OS=Homo sapiens GN=HSPA2 PE=1 SV=1
Q5GLZ8	HERC4_HUMAN	-1.9401	-2.01606	-1.01909	0.588797	-0.249485	-0.300437	-1.04839	-1.87338	-1.45546	-0.0459272	0.433502	-0.278269	0.637679	0.816776	4	7	2	3	0.312752	-1.03485	0.00925679	1.3476	HERC4_HUMAN Probable E3 ubiquitin-protein ligase HERC4 OS=Homo sapiens GN=HERC4 PE=1 SV=1
Q8IYS1	P20D2_HUMAN	-1.73054	0.149155	0.318855	-0.427709	-0.442362	-0.330473	-0.546966	-0.652814	-0.547503	0.928521	1.00312	0.673306	0.66865	1.12178	6	3	4	5	0.879073	-0.467818	0.000321679	1.34689	P20D2_HUMAN Peptidase M20 domain-containing protein 2 OS=Homo sapiens GN=PM20D2 PE=1 SV=2
Q9UKW4	VAV3_HUMAN	-0.439347	-0.245834	-0.48906	-0.876043	-0.22875	-0.208549	-0.468426	-0.212145	-0.616723	-0.242043	1.23487	1.50914	1.0248	1.08648	4	7	6	2	0.92265	-0.420542	0.000122115	1.34319	VAV3_HUMAN Guanine nucleotide exchange factor VAV3 OS=Homo sapiens GN=VAV3 PE=1 SV=1
O75943	RAD17_HUMAN	-1.17411	0.408507	0.874421	0.342305	0.578715	0.466174	-0.866964	-1.11996	-0.298803	0.829013	1.46708	1.64837	1.14768	1.17938	3	6	5	3	1.2543	-0.0877463	0.00374409	1.34205	RAD17_HUMAN Cell cycle checkpoint protein RAD17 OS=Homo sapiens GN=RAD17 PE=1 SV=2
O14717	TRDMT_HUMAN	-0.855435	-1.27099	-0.516993	-0.255019	-0.280758	-0.293213	-0.101416	-0.492719	-0.238133	0.614203	1.08784	1.2115	1.0233	0.380149	2	2	1	1	0.863399	-0.478297	2.49153e-05	1.3417	TRDMT_HUMAN tRNA (cytosine(38)-C(5))-methyltransferase OS=Homo sapiens GN=TRDMT1 PE=1 SV=1
P20908	CO5A1_HUMAN	0.254949	-0.724389	-1.00775	-1.371	-0.611658	-0.695717	-1.55198	-1.16011	-1.16265	1.80055	2.59852	-0.96704	-0.570261	-0.616886	2	3	3	3	0.448977	-0.892257	0.0388951	1.34123	CO5A1_HUMAN Collagen alpha-1(V) chain OS=Homo sapiens GN=COL5A1 PE=1 SV=3
Q9NZL4	HPBP1_HUMAN	0.0802388	-1.32191	-0.924258	0.451406	-0.351652	-0.261324	-0.62881	-0.841389	-0.665254	0.901422	1.00143	0.689559	0.761663	0.870586	12	11	9	8	0.844933	-0.495884	0.000165455	1.34082	HPBP1_HUMAN Hsp70-binding protein 1 OS=Homo sapiens GN=HSPBP1 PE=1 SV=1
P54105	ICLN_HUMAN	-0.855754	-0.474329	-1.09266	-0.272253	-1.46236	-1.06115	-1.21457	-1.74169	-1.22929	0.674593	1.48703	-0.112338	-0.531124	-0.0442861	7	7	8	9	0.294776	-1.0449	0.00159872	1.33967	ICLN_HUMAN Methylosome subunit pICln OS=Homo sapiens GN=CLNS1A PE=1 SV=1
Q969Y2	GTPB3_HUMAN	-0.883268	-0.893126	-0.939474	0.614581	0.430752	0.836514	-0.973538	-1.57925	-0.452349	1.59732	0.561388	1.39419	0.0292712	0.98171	2	3	3	4	0.912776	-0.426573	0.00971685	1.33935	GTPB3_HUMAN tRNA modification GTPase GTPBP3, mitochondrial OS=Homo sapiens GN=GTPBP3 PE=1 SV=2
O00231	PSD11_HUMAN	0.697807	-2.9709	-0.25628	-2.11221	-1.06987	-1.43425	-1.86362	-1.99371	-2.22533	-0.245607	-0.0714931	0.536638	-0.439973	-0.443299	20	16	14	21	-0.132747	-1.46982	0.0257451	1.33707	PSD11_HUMAN 26S proteasome non-ATPase regulatory subunit 11 OS=Homo sapiens GN=PSMD11 PE=1 SV=3
Q9NP61	ARFG3_HUMAN	-0.696281	-0.952341	0.748003	-0.918935	-0.860435	-0.889499	-0.950039	-1.45938	-1.02254	0.800073	1.94459	-0.181589	0.109781	0.121766	6	5	7	7	0.558925	-0.777938	0.00503584	1.33686	ARFG3_HUMAN ADP-ribosylation factor GTPase-activating protein 3 OS=Homo sapiens GN=ARFGAP3 PE=1 SV=1
O75534	CSDE1_HUMAN	-0.659807	-0.566952	-0.675175	-2.17827	0.194017	0.257977	0.163586	0.192722	0.291302	0.414433	1.15672	1.09995	0.962238	1.39113	39	25	30	37	1.00489	-0.331178	0.00472681	1.33607	CSDE1_HUMAN Cold shock domain-containing protein E1 OS=Homo sapiens GN=CSDE1 PE=1 SV=2
Q9BSL1	UBAC1_HUMAN	-1.50865	1.34923	-1.35579	-0.173589	-0.478324	-0.699739	-0.774311	-0.462061	-0.177376	-1.16531	1.79747	1.74773	0.600212	1.31741	1	2	4	4	0.859501	-0.475623	0.0310894	1.33512	UBAC1_HUMAN Ubiquitin-associated domain-containing protein 1 OS=Homo sapiens GN=UBAC1 PE=1 SV=1
Q9NUQ8	ABCF3_HUMAN	-1.8565	-0.608719	1.33016	-0.00133807	0.567559	0.304811	-0.183747	-0.363077	-0.138836	-0.420851	0.872	2.23272	1.49466	1.96835	16	14	15	11	1.22938	-0.105521	0.0254098	1.3349	ABCF3_HUMAN ATP-binding cassette sub-family F member 3 OS=Homo sapiens GN=ABCF3 PE=1 SV=2
Q86UV5	UBP48_HUMAN	-1.12855	0.337138	-0.163003	-0.186981	1.15406	0.787193	0.519934	0.356258	0.699178	1.05463	2.48196	0.491976	1.95529	2.00523	20	17	17	25	1.59782	0.263914	0.00619073	1.3339	UBP48_HUMAN Ubiquitin carboxyl-terminal hydrolase 48 OS=Homo sapiens GN=USP48 PE=1 SV=1
Q03426	KIME_HUMAN	-0.417274	-0.824444	-0.44674	-0.313985	0.898595	0.257613	-0.536697	-0.216063	0.139962	-0.00189265	0.955785	1.6607	1.78106	1.45786	9	6	5	6	1.1707	-0.162115	0.00172855	1.33282	KIME_HUMAN Mevalonate kinase OS=Homo sapiens GN=MVK PE=1 SV=1
Q9Y4G6	TLN2_HUMAN	-0.530962	-0.791376	1.02824	-0.0399267	0.0777952	-0.0172301	-0.841786	-1.1127	-1.14492	1.8046	1.46783	-0.082311	0.827989	0.770474	1	2	1	3	0.957716	-0.374762	0.00570866	1.33248	TLN2_HUMAN Talin-2 OS=Homo sapiens GN=TLN2 PE=1 SV=4
Q7Z4S6	KI21A_HUMAN	-1.68537	-0.81648	-0.53903	-0.175425	-0.102623	-0.304423	-0.745721	-0.5508	-0.529457	-0.0393384	0.225192	1.62584	0.787511	1.0353	12	15	20	15	0.726902	-0.605481	0.000847418	1.33238	KI21A_HUMAN Kinesin-like protein KIF21A OS=Homo sapiens GN=KIF21A PE=1 SV=2
Q13576	IQGA2_HUMAN	-2.09998	0.402312	-0.68625	-2.21793	0.290205	1.19401	0.273907	-0.194731	1.30263	1.1186	0.26112	1.77828	1.11164	1.42402	97	60	58	67	1.13873	-0.19287	0.0486598	1.3316	IQGA2_HUMAN Ras GTPase-activating-like protein IQGAP2 OS=Homo sapiens GN=IQGAP2 PE=1 SV=4
O15061	SYNEM_HUMAN	-0.218308	-0.364759	-1.72285	0.220405	0.559237	1.20874	0.550532	0.355256	1.03824	1.93397	1.07341	2.44763	0.722296	1.37233	22	10	18	11	1.50993	0.180721	0.0131953	1.32921	SYNEM_HUMAN Synemin OS=Homo sapiens GN=SYNM PE=1 SV=2
Q01974	ROR2_HUMAN	-0.751899	-0.900643	0.727845	-0.705721	-0.736476	-0.751158	-0.79331	-0.963298	-1.10022	0.748084	0.329776	2.91892	-0.207771	-0.464973	1	3	3	4	0.664806	-0.663876	0.0204019	1.32868	ROR2_HUMAN Tyrosine-protein kinase transmembrane receptor ROR2 OS=Homo sapiens GN=ROR2 PE=1 SV=2
Q8N653	LZTR1_HUMAN	0.340094	-0.59855	0.051553	0.0814885	-0.696402	-0.103782	0.356996	0.476063	0.114113	1.57712	1.14068	1.28873	1.10943	1.52993	3	2	1	2	1.32918	0.00239711	2.3446e-05	1.32678	LZTR1_HUMAN Leucine-zipper-like transcriptional regulator 1 OS=Homo sapiens GN=LZTR1 PE=1 SV=2
Q8WVJ2	NUDC2_HUMAN	-0.546905	-0.0770771	0.182842	-1.26902	-0.106633	-0.7219	-0.333675	-0.329521	-0.146846	0.201823	0.811325	1.00531	0.977101	1.7734	4	3	3	4	0.953793	-0.372082	0.000321575	1.32588	NUDC2_HUMAN NudC domain-containing protein 2 OS=Homo sapiens GN=NUDCD2 PE=1 SV=1
Q9P2L0	WDR35_HUMAN	0.251895	-0.435597	-1.69967	-1.12261	0.207246	0.376425	0.157291	1.02129	0.208382	1.7682	0.563047	0.64599	1.27843	1.79251	4	5	1	1	1.20963	-0.115039	0.00892237	1.32467	WDR35_HUMAN WD repeat-containing protein 35 OS=Homo sapiens GN=WDR35 PE=1 SV=3
P30291	WEE1_HUMAN	-1.04276	-0.355254	-0.298559	0.325289	0.173287	-0.271107	0.528542	0.384263	0.706346	0.852834	2.3018	0.554492	1.43904	1.54376	4	2	3	1	1.33838	0.0166716	0.00184549	1.32171	WEE1_HUMAN Wee1-like protein kinase OS=Homo sapiens GN=WEE1 PE=1 SV=2
Q8TDB6	DTX3L_HUMAN	-1.74962	-0.0803617	-0.397424	-0.11548	1.07205	0.551706	0.719189	0.864812	0.807394	0.4985	1.54451	2.18461	1.82729	1.47636	14	7	10	8	1.50625	0.185808	0.0128073	1.32044	DTX3L_HUMAN E3 ubiquitin-protein ligase DTX3L OS=Homo sapiens GN=DTX3L PE=1 SV=1
P62191	PRS4_HUMAN	-0.431637	-2.59127	0.135033	-1.86744	-1.17555	-1.42706	-1.83065	-1.95127	-1.93872	0.208726	-0.385581	1.01679	-0.752555	-0.760143	28	16	25	25	-0.134552	-1.45317	0.0135161	1.31862	PRS4_HUMAN 26S protease regulatory subunit 4 OS=Homo sapiens GN=PSMC1 PE=1 SV=1
Q9H974	QTRT2_HUMAN	-1.12646	-0.929023	-0.221119	-0.802029	-1.01077	-0.878958	-1.10548	-0.906707	-1.071	1.08551	1.5755	-0.688384	-0.228319	0.375029	3	5	5	3	0.423868	-0.894618	0.00153626	1.31849	QTRT2_HUMAN Queuine tRNA-ribosyltransferase accessory subunit 2 OS=Homo sapiens GN=QTRT2 PE=1 SV=1
Q9H0C5	BTBD1_HUMAN	0.582499	-0.996388	0.13513	-0.526986	0.525407	0.459564	0.492706	0.569426	0.209909	1.44579	1.74984	0.994986	1.45631	1.72315	6	5	3	3	1.47402	0.161252	0.000418989	1.31276	BTBD1_HUMAN BTB/POZ domain-containing protein 1 OS=Homo sapiens GN=BTBD1 PE=1 SV=1
Q9H9H4	VP37B_HUMAN	-0.487338	-1.55473	-0.162034	-0.360691	0.255898	-0.194726	-0.890581	-0.774848	-0.877835	1.33073	0.933294	1.46708	0.237883	-0.209985	1	2	4	1	0.751799	-0.560765	0.00202314	1.31256	VP37B_HUMAN Vacuolar protein sorting-associated protein 37B OS=Homo sapiens GN=VPS37B PE=1 SV=1
O43572	AKA10_HUMAN	-0.0914927	0.164402	0.661166	-2.20223	0.501058	0.290053	-1.65871	-1.64335	-1.35216	0.489315	1.29789	1.12125	0.0641086	0.621404	3	1	3	1	0.718794	-0.592363	0.028876	1.31116	AKA10_HUMAN A-kinase anchor protein 10, mitochondrial OS=Homo sapiens GN=AKAP10 PE=1 SV=2
Q9P2J5	SYLC_HUMAN	-0.458429	-2.45094	-0.633404	-1.6354	-0.506557	-1.01836	-1.4055	-1.70878	-1.56929	-0.682143	0.745619	0.785608	-0.305891	-0.324378	39	27	36	38	0.0437631	-1.26518	0.00430718	1.30895	SYLC_HUMAN Leucine--tRNA ligase, cytoplasmic OS=Homo sapiens GN=LARS PE=1 SV=2
Q96RN5	MED15_HUMAN	-0.936959	-1.09696	-1.01958	-1.02053	0.239452	0.438673	-7.49346e-06	0.116456	0.0239641	0.493382	1.82551	2.05059	0.245806	0.110792	6	4	5	3	0.945215	-0.361722	0.00835703	1.30694	MED15_HUMAN Mediator of RNA polymerase II transcription subunit 15 OS=Homo sapiens GN=MED15 PE=1 SV=2
Q9Y2Z0	SGT1_HUMAN	-0.404683	-1.92583	-0.720207	-0.560217	-1.57911	-1.31363	-1.59763	-1.77665	-1.6456	0.161848	1.22521	0.35094	-0.824947	-0.783692	13	9	19	15	0.0258711	-1.2804	0.00480174	1.30627	SGT1_HUMAN Protein SGT1 homolog OS=Homo sapiens GN=SUGT1 PE=1 SV=3
Q96EK5	KBP_HUMAN	0.412008	-1.1533	-0.157726	-1.1199	-0.384307	-0.442688	-0.806902	-0.741938	-0.746041	0.116955	1.18214	1.48143	0.175987	0.704334	7	4	13	14	0.732169	-0.5712	0.000877543	1.30337	KBP_HUMAN KIF1-binding protein OS=Homo sapiens GN=KIF1BP PE=1 SV=1
P40692	MLH1_HUMAN	-0.675542	0.09781	-0.513368	-0.611592	0.601872	0.729382	0.317392	0.148047	0.114646	0.614127	0.893013	1.30537	1.78655	2.03303	16	14	11	13	1.32642	0.0231831	0.00102348	1.30323	MLH1_HUMAN DNA mismatch repair protein Mlh1 OS=Homo sapiens GN=MLH1 PE=1 SV=1
Q8WXD5	GEMI6_HUMAN	0.290164	-0.0722807	-0.568352	-0.157584	0.0300521	-0.26076	-1.0733	-0.855529	-1.17538	1.84535	0.20614	1.01957	0.649445	0.654556	1	2	1	1	0.875012	-0.426997	0.00115083	1.30201	GEMI6_HUMAN Gem-associated protein 6 OS=Homo sapiens GN=GEMIN6 PE=1 SV=1
P55055	NR1H2_HUMAN	-1.40174	0.418392	-0.644794	-0.772257	0.607979	0.0650035	0.889544	0.404362	0.452344	2.44326	1.15515	1.19529	1.46437	0.258639	1	2	3	1	1.30334	0.00209218	0.0105574	1.30125	NR1H2_HUMAN Oxysterols receptor LXR-beta OS=Homo sapiens GN=NR1H2 PE=1 SV=2
O43734	CIKS_HUMAN	-1.70481	-0.0431692	-0.231599	0.169826	-0.174301	0.22853	-0.386633	-0.747078	-0.187093	1.97967	1.51159	0.47182	0.194796	0.63892	4	1	2	1	0.959359	-0.341814	0.00363752	1.30117	CIKS_HUMAN Adapter protein CIKS OS=Homo sapiens GN=TRAF3IP2 PE=1 SV=3
A0A0X1KG71	A0A0X1KG71_HUMAN	-0.781171	0.374572	-0.603945	-0.0161025	0.446635	0.203553	-0.724313	-0.672689	-0.883657	0.66303	0.585683	1.04679	1.36704	1.36494	1	1	3	2	1.0055	-0.295235	0.000467328	1.30073	A0A0X1KG71_HUMAN Negative elongation factor B OS=Homo sapiens GN=NELFB PE=1 SV=1
Q9HAW4	CLSPN_HUMAN	1.52069	0.326598	-0.0801532	-0.630338	-0.339689	-0.333546	-0.0844728	0.0116591	0.164935	1.89848	2.5455	0.408677	0.87281	1.0709	8	3	8	5	1.35927	0.0617427	0.00636655	1.29753	CLSPN_HUMAN Claspin OS=Homo sapiens GN=CLSPN PE=1 SV=3
Q9UMZ2	SYNRG_HUMAN	-1.42853	-0.454143	-0.146564	-1.03303	-0.796451	-0.638147	0.622111	-0.641773	0.691551	0.944203	1.35727	1.81964	-0.271297	0.504086	4	2	5	2	0.870781	-0.424997	0.00868923	1.29578	SYNRG_HUMAN Synergin gamma OS=Homo sapiens GN=SYNRG PE=1 SV=2
P15735	PHKG2_HUMAN	-0.672453	-1.06117	-1.2114	-1.88346	-0.443984	-0.324539	-0.482314	-0.646473	-0.427845	-0.194264	0.700989	1.00205	0.289367	0.702578	3	2	3	2	0.500145	-0.79485	0.000496685	1.29499	PHKG2_HUMAN Phosphorylase b kinase gamma catalytic chain, liver/testis isoform OS=Homo sapiens GN=PHKG2 PE=1 SV=1
P07384	CAN1_HUMAN	0.240933	-2.35413	-0.227596	-2.58314	-1.67136	-1.45745	-2.17153	-1.96946	-1.82699	-0.235244	0.342976	0.717717	-1.17053	-0.972911	10	10	18	17	-0.263598	-1.55786	0.0257843	1.29426	CAN1_HUMAN Calpain-1 catalytic subunit OS=Homo sapiens GN=CAPN1 PE=1 SV=1
Q14240	IF4A2_HUMAN	-1.32993	-1.17711	-1.54974	-1.7204	-0.199918	-0.28534	-0.211066	-0.340727	-0.220016	-0.361252	0.81459	1.05663	0.454814	0.595127	18	19	19	20	0.511982	-0.781582	0.00260801	1.29356	IF4A2_HUMAN Eukaryotic initiation factor 4A-II OS=Homo sapiens GN=EIF4A2 PE=1 SV=2
Q96LD4	TRI47_HUMAN	-1.0426	0.213433	0.820805	0.911851	-0.0465234	-0.0165152	0.439749	-0.319041	0.21466	1.06215	0.755689	2.9821	1.00696	1.31233	15	12	13	14	1.42384	0.130647	0.00665929	1.2932	TRI47_HUMAN Tripartite motif-containing protein 47 OS=Homo sapiens GN=TRIM47 PE=1 SV=2
Q9UJX2	CDC23_HUMAN	-2.5847	-1.21532	0.185697	-0.887942	0.492911	0.50248	-0.13986	-0.410501	-0.0412092	0.875783	1.57118	-0.179051	0.841596	1.06307	5	9	6	6	0.834515	-0.455383	0.0228161	1.2899	CDC23_HUMAN Cell division cycle protein 23 homolog OS=Homo sapiens GN=CDC23 PE=1 SV=3
Q5SXM2	SNPC4_HUMAN	-1.1498	-0.219337	-0.153065	-1.17956	0.468149	0.0138934	-0.395111	-1.08273	-0.52606	0.364721	0.91688	0.819332	1.18009	0.821883	4	3	5	2	0.820582	-0.469291	0.000564803	1.28987	SNPC4_HUMAN snRNA-activating protein complex subunit 4 OS=Homo sapiens GN=SNAPC4 PE=1 SV=1
Q5VV42	CDKAL_HUMAN	-1.01717	-0.582674	-0.299518	-0.332008	0.825108	0.289962	0.466908	0.0222346	0.40009	0.642342	0.991279	2.08496	1.28957	1.31478	9	6	7	7	1.26459	-0.02523	0.00151889	1.28982	CDKAL_HUMAN Threonylcarbamoyladenosine tRNA methylthiotransferase OS=Homo sapiens GN=CDKAL1 PE=1 SV=1
Q9H000	MKRN2_HUMAN	-0.825337	-0.457116	-0.469506	-1.44039	0.669934	0.0920895	0.780065	0.134238	0.686189	1.31136	1.7066	-0.100123	1.43231	1.61104	3	4	1	2	1.19224	-0.092204	0.0101049	1.28444	MKRN2_HUMAN Probable E3 ubiquitin-protein ligase makorin-2 OS=Homo sapiens GN=MKRN2 PE=1 SV=2
P15924	DESP_HUMAN	-1.06853	-0.00510343	0.341079	0.167147	0.798008	0.812731	0.767037	1.36223	-0.0199277	1.87517	1.99441	0.663212	1.53704	2.10167	64	41	60	48	1.6343	0.350519	0.00463432	1.28378	DESP_HUMAN Desmoplakin OS=Homo sapiens GN=DSP PE=1 SV=3
Q14432	PDE3A_HUMAN	-1.52783	-0.331591	0.695019	-0.0299124	-0.221247	-0.239744	-0.32272	-0.301587	-0.151154	0.798107	1.40461	0.655691	0.825394	1.37836	14	16	13	16	1.01243	-0.270085	0.000689907	1.28252	PDE3A_HUMAN cGMP-inhibited 3',5'-cyclic phosphodiesterase A OS=Homo sapiens GN=PDE3A PE=1 SV=3
Q8NG31	CASC5_HUMAN	-1.16168	0.0934772	0.0518081	-0.937263	0.637831	0.727231	1.46204	0.758256	1.06078	1.74661	2.25573	0.0129366	1.89247	1.99987	29	14	9	5	1.58152	0.299164	0.0234541	1.28236	CASC5_HUMAN Protein CASC5 OS=Homo sapiens GN=CASC5 PE=1 SV=3
Q969F9	HPS3_HUMAN	-0.299027	-0.255855	0.0831289	-0.514392	0.0122347	0.0461828	-0.0633269	0.584501	0.339524	1.225	1.04939	1.35243	1.43272	1.31375	5	9	6	1	1.27466	-0.0074476	3.46231e-06	1.28211	HPS3_HUMAN Hermansky-Pudlak syndrome 3 protein OS=Homo sapiens GN=HPS3 PE=1 SV=1
A4D1P6	WDR91_HUMAN	-0.658774	-0.0666723	-1.53585	0.0413985	0.241515	0.483189	-1.35956	-0.950336	-1.28386	0.830371	0.503619	1.06357	0.380626	0.799812	1	1	2	1	0.715599	-0.565438	0.00371411	1.28104	WDR91_HUMAN WD repeat-containing protein 91 OS=Homo sapiens GN=WDR91 PE=1 SV=2
Q9NW08	RPC2_HUMAN	-0.503284	-0.967458	1.14529	-1.8669	0.506805	0.300897	0.376138	0.0330986	0.446504	0.928884	1.68553	1.59325	0.981847	0.892899	11	10	11	9	1.21648	-0.0587675	0.0123343	1.27525	RPC2_HUMAN DNA-directed RNA polymerase III subunit RPC2 OS=Homo sapiens GN=POLR3B PE=1 SV=2
Q9Y6K9	NEMO_HUMAN	-1.78966	0.723914	1.30896	-1.24681	-0.0790224	-0.0467843	0.395712	-0.388702	0.258288	1.0899	1.81873	0.653301	1.1046	1.22625	6	4	8	10	1.17856	-0.0960126	0.0160633	1.27457	NEMO_HUMAN NF-kappa-B essential modulator OS=Homo sapiens GN=IKBKG PE=1 SV=2
P42356	PI4KA_HUMAN	-0.418374	-0.00152901	-1.03272	-0.926933	0.370327	0.102041	0.259562	0.626249	0.173712	1.09465	2.02191	1.22028	0.817361	0.737556	6	12	7	2	1.17835	-0.0941846	0.00145427	1.27254	PI4KA_HUMAN Phosphatidylinositol 4-kinase alpha OS=Homo sapiens GN=PI4KA PE=1 SV=4
Q7Z2Z2	EFL1_HUMAN	-0.835628	-0.560958	-3.54256	-1.74229	-0.243295	-0.514186	-0.0355287	-0.419406	-0.121193	0.546195	0.945489	0.372674	0.111987	-0.0722995	9	16	6	10	0.380809	-0.89056	0.0320083	1.27137	EFL1_HUMAN Elongation factor-like GTPase 1 OS=Homo sapiens GN=EFL1 PE=1 SV=2
P61956	SUMO2_HUMAN	-1.16893	-1.16297	0.371831	0.175772	-1.47762	-1.15805	-1.49345	-1.66267	-1.64822	0.343774	1.73647	1.07598	-1.22122	-0.709216	3	1	3	2	0.245156	-1.02492	0.0325238	1.27008	SUMO2_HUMAN Small ubiquitin-related modifier 2 OS=Homo sapiens GN=SUMO2 PE=1 SV=3
Q92947	GCDH_HUMAN	-1.58235	-0.652055	-1.17735	-1.61425	0.295631	-0.690276	-0.249753	-0.808373	-0.605242	-0.491782	0.124527	0.719767	1.30085	0.757746	8	3	4	6	0.482223	-0.787113	0.00383685	1.26934	GCDH_HUMAN Glutaryl-CoA dehydrogenase, mitochondrial OS=Homo sapiens GN=GCDH PE=1 SV=1
Q8WWV3	RT4I1_HUMAN	-2.09007	-1.50531	-0.638305	-1.32992	-0.0324909	-0.686794	-0.793735	-0.633074	-0.85303	-1.20268	0.6252	0.0566216	1.06535	1.0432	9	6	4	7	0.317539	-0.951415	0.00915555	1.26895	RT4I1_HUMAN Reticulon-4-interacting protein 1, mitochondrial OS=Homo sapiens GN=RTN4IP1 PE=1 SV=2
Q6R327	RICTR_HUMAN	-1.80998	-0.30939	-0.000920683	0.130052	0.676286	0.276318	0.289819	0.289652	0.691061	0.954211	1.47922	0.880429	1.43975	1.69679	16	18	10	11	1.29008	0.0258779	0.0044772	1.2642	RICTR_HUMAN Rapamycin-insensitive companion of mTOR OS=Homo sapiens GN=RICTOR PE=1 SV=1
Q9NTJ3	SMC4_HUMAN	-1.8255	-0.775908	1.06861	-1.59774	0.478202	0.201121	0.0601092	-0.163769	0.198334	-0.499455	0.810347	1.50849	1.43798	1.75441	76	39	48	57	1.00235	-0.261838	0.0331956	1.26419	SMC4_HUMAN Structural maintenance of chromosomes protein 4 OS=Homo sapiens GN=SMC4 PE=1 SV=2
Q8IXH7	NELFD_HUMAN	-0.623966	-0.369426	-0.519865	-0.544188	-0.0744329	-0.403099	0.175753	0.0480829	0.364224	0.278399	1.8663	1.2923	0.975376	0.805068	8	7	9	6	1.04349	-0.216324	0.000279676	1.25981	NELFD_HUMAN Negative elongation factor C/D OS=Homo sapiens GN=NELFCD PE=1 SV=2
O95456	PSMG1_HUMAN	0.403457	-1.51768	0.671265	-1.13134	-1.15197	-1.14159	-2.08007	-1.8822	-1.86539	0.977112	1.11378	0.692232	-1.09248	-0.790113	3	1	6	6	0.180107	-1.07728	0.0441108	1.25739	PSMG1_HUMAN Proteasome assembly chaperone 1 OS=Homo sapiens GN=PSMG1 PE=1 SV=1
Q8N3R9	MPP5_HUMAN	-0.193972	-0.182686	-0.657	-1.04651	-0.330067	-0.016654	-0.280604	-1.04286	-0.486144	0.839383	0.796149	0.74242	0.325339	1.22255	3	4	9	7	0.785169	-0.470721	3.83138e-05	1.25589	MPP5_HUMAN MAGUK p55 subfamily member 5 OS=Homo sapiens GN=MPP5 PE=1 SV=3
P19474	RO52_HUMAN	-0.176867	-0.378226	0.714254	-0.935506	-0.337227	-0.357969	-0.311836	-0.566577	-0.474902	1.22033	0.835078	1.09676	0.388412	1.16562	4	2	4	4	0.941241	-0.313873	0.000142128	1.25511	RO52_HUMAN E3 ubiquitin-protein ligase TRIM21 OS=Homo sapiens GN=TRIM21 PE=1 SV=1
Q96P47	AGAP3_HUMAN	-0.947995	-0.500537	-1.0812	1.02834	-0.553699	-0.240693	-0.0656521	-0.480556	-0.0833903	1.04566	1.16374	1.24471	0.545247	0.64811	7	1	1	3	0.929493	-0.325043	0.00121157	1.25454	AGAP3_HUMAN Arf-GAP with GTPase, ANK repeat and PH domain-containing protein 3 OS=Homo sapiens GN=AGAP3 PE=1 SV=2
P34931	HS71L_HUMAN	-0.362689	-0.270332	-0.0693362	0.179378	-1.01993	-1.07938	-1.07663	-1.29236	-1.19141	1.55788	1.76811	0.96414	-0.788357	-0.668255	18	12	17	17	0.566704	-0.686965	0.0197619	1.25367	HS71L_HUMAN Heat shock 70 kDa protein 1-like OS=Homo sapiens GN=HSPA1L PE=1 SV=2
Q9H5N1	RABE2_HUMAN	-0.953513	0.326114	0.342858	-0.322874	-0.615246	-0.808379	-1.60141	-1.97791	-1.73501	0.99264	-0.609794	1.70262	0.113212	-0.032992	2	3	9	4	0.433136	-0.816151	0.0244114	1.24929	RABE2_HUMAN Rab GTPase-binding effector protein 2 OS=Homo sapiens GN=RABEP2 PE=1 SV=2
Q8TEU7	RPGF6_HUMAN	-1.16945	-1.65391	0.605806	-0.441774	-0.0168296	0.0544644	-0.760108	-0.555326	-0.716005	0.163421	1.18426	1.10669	0.46271	0.739303	7	9	10	4	0.731277	-0.517015	0.00306392	1.24829	RPGF6_HUMAN Rap guanine nucleotide exchange factor 6 OS=Homo sapiens GN=RAPGEF6 PE=1 SV=2
Q8IX90	SKA3_HUMAN	-0.798222	0.271799	-0.126038	0.165872	0.123466	-0.305284	-0.286916	-1.02651	0.00328518	0.30947	1.6074	1.6387	0.712284	0.861537	4	4	6	2	1.02588	-0.219839	0.000689218	1.24572	SKA3_HUMAN Spindle and kinetochore-associated protein 3 OS=Homo sapiens GN=SKA3 PE=1 SV=2
O94979	SC31A_HUMAN	-0.578143	-1.24255	-0.663402	-1.28247	-0.997887	-1.1618	-1.77268	-1.66701	-1.25832	-0.605444	0.319624	1.67279	-0.627845	-0.441154	19	15	14	21	0.0635944	-1.18047	0.00508876	1.24407	SC31A_HUMAN Protein transport protein Sec31A OS=Homo sapiens GN=SEC31A PE=1 SV=3
O43427	FIBP_HUMAN	-0.529661	-0.196509	-0.0135819	-0.324201	0.158293	-0.532516	-0.566047	-0.858697	-0.424197	0.241317	1.07063	1.24378	1.01454	0.817696	4	3	3	3	0.877593	-0.365235	2.54699e-05	1.24283	FIBP_HUMAN Acidic fibroblast growth factor intracellular-binding protein OS=Homo sapiens GN=FIBP PE=1 SV=3
O60343	TBCD4_HUMAN	0.0516952	-0.132272	-0.539885	-1.48181	-0.0938879	-0.526055	-1.0651	-0.88951	-0.344957	-0.138661	0.134869	1.80841	0.941838	0.675921	8	9	13	11	0.684476	-0.557975	0.00302498	1.24245	TBCD4_HUMAN TBC1 domain family member 4 OS=Homo sapiens GN=TBC1D4 PE=1 SV=2
O00410	IPO5_HUMAN	0.56256	-1.39388	-0.845279	-0.966314	-0.840401	-1.02264	-1.02563	-1.28126	-1.2511	-1.06352	0.662437	1.44972	0.130787	0.549008	29	27	28	23	0.345686	-0.895995	0.00875753	1.24168	IPO5_HUMAN Importin-5 OS=Homo sapiens GN=IPO5 PE=1 SV=4
O75879	GATB_HUMAN	-1.78669	-0.0545711	-1.86372	-0.931866	-0.304513	-0.422452	-0.149753	-0.338271	-0.157883	0.510632	0.513501	0.995537	0.154526	0.690498	7	5	4	2	0.572939	-0.667747	0.00302398	1.24069	GATB_HUMAN Glutamyl-tRNA(Gln) amidotransferase subunit B, mitochondrial OS=Homo sapiens GN=GATB PE=1 SV=1
Q96RT1	ERBIN_HUMAN	-0.220694	-0.385517	-2.05419	0.0213583	-0.350062	-0.204609	-0.341851	-0.0114113	-0.155817	1.88456	1.03678	1.07202	-0.131121	0.280019	17	12	15	12	0.828452	-0.411422	0.00705256	1.23987	ERBIN_HUMAN Erbin OS=Homo sapiens GN=ERBIN PE=1 SV=2
Q8N999	CL029_HUMAN	-1.42338	-0.279634	1.15418	0.361787	-0.0405429	-0.125371	0.103327	-0.413456	-0.307133	1.99759	1.15126	-0.274504	0.795748	1.98067	3	1	3	2	1.13015	-0.107802	0.0148337	1.23795	CL029_HUMAN Uncharacterized protein C12orf29 OS=Homo sapiens GN=C12orf29 PE=1 SV=2
O75150	BRE1B_HUMAN	-0.921297	0.000811973	0.0111709	-1.28361	-0.0690704	0.00505694	0.373666	0.102299	0.330641	0.202966	0.885324	1.662	1.06371	1.55513	22	17	23	31	1.07382	-0.161147	0.00217026	1.23497	BRE1B_HUMAN E3 ubiquitin-protein ligase BRE1B OS=Homo sapiens GN=RNF40 PE=1 SV=4
Q8IU85	KCC1D_HUMAN	-1.10144	-0.730157	0.819735	-1.04951	-0.52457	-0.625232	-1.48089	-1.55727	-1.55528	0.734175	0.550712	0.406767	0.0905145	0.0435952	5	5	5	6	0.365153	-0.867179	0.00445392	1.23233	KCC1D_HUMAN Calcium/calmodulin-dependent protein kinase type 1D OS=Homo sapiens GN=CAMK1D PE=1 SV=1
Q99728	BARD1_HUMAN	-0.7565	0.571009	-0.915774	-0.756808	1.30767	1.03076	0.657862	0.377457	0.846912	1.13679	1.67996	2.27807	1.25777	1.12023	5	5	2	1	1.49456	0.26251	0.0121396	1.23205	BARD1_HUMAN BRCA1-associated RING domain protein 1 OS=Homo sapiens GN=BARD1 PE=1 SV=2
Q6PGP7	TTC37_HUMAN	-0.500872	-0.399027	-1.39421	-1.58425	0.202752	-0.602394	-0.483102	-0.504228	-0.227472	-0.678498	0.895991	1.53022	0.728262	0.632389	32	28	28	26	0.621673	-0.610312	0.00524736	1.23199	TTC37_HUMAN Tetratricopeptide repeat protein 37 OS=Homo sapiens GN=TTC37 PE=1 SV=1
Q04721	NOTC2_HUMAN	-0.943503	-0.895643	-0.638937	-0.0963484	-0.416124	-0.741095	-0.798607	-1.26782	-0.62403	0.374862	0.477919	2.07114	-0.0564528	-0.278165	10	5	14	9	0.517861	-0.713567	0.00305975	1.23143	NOTC2_HUMAN Neurogenic locus notch homolog protein 2 OS=Homo sapiens GN=NOTCH2 PE=1 SV=3
Q9Y2X9	ZN281_HUMAN	-1.37206	0.338369	-1.26031	-0.433124	0.901436	0.456202	0.407309	0.225381	0.344638	1.22991	1.76554	0.686075	1.27103	0.983572	10	8	7	7	1.18723	-0.0435732	0.00779997	1.2308	ZN281_HUMAN Zinc finger protein 281 OS=Homo sapiens GN=ZNF281 PE=1 SV=1
Q13158	FADD_HUMAN	-1.95188	-0.494642	-1.23447	-0.32127	0.0574088	-0.799886	-0.640412	-0.556484	-0.4449	0.775761	1.19161	0.0702264	0.268649	0.287522	5	5	4	2	0.518755	-0.709615	0.00160744	1.22837	FADD_HUMAN FAS-associated death domain protein OS=Homo sapiens GN=FADD PE=1 SV=1
P56945	BCAR1_HUMAN	-0.224038	-0.793532	1.59736	-0.513485	-1.13679	-0.787303	-1.26921	-1.44961	-1.02184	1.08333	1.107	0.30071	-0.195021	0.722858	4	2	7	5	0.603775	-0.622048	0.019055	1.22582	BCAR1_HUMAN Breast cancer anti-estrogen resistance protein 1 OS=Homo sapiens GN=BCAR1 PE=1 SV=2
Q8WVT3	TPC12_HUMAN	0.39748	-0.156481	-0.273886	-0.666899	-0.613938	-1.17848	-0.452697	-1.54544	-0.80989	0.6902	0.488249	0.722674	0.520558	0.754839	4	3	3	3	0.635304	-0.588914	0.000545543	1.22422	TPC12_HUMAN Trafficking protein particle complex subunit 12 OS=Homo sapiens GN=TRAPPC12 PE=1 SV=3
Q9UEW8	STK39_HUMAN	-1.94162	-0.488122	-1.228	-0.342936	0.37323	-0.325474	0.265945	0.075971	0.123267	0.0448283	1.27302	0.361474	1.36546	1.12847	7	5	7	6	0.83465	-0.387527	0.00933072	1.22218	STK39_HUMAN STE20/SPS1-related proline-alanine-rich protein kinase OS=Homo sapiens GN=STK39 PE=1 SV=3
Q15036	SNX17_HUMAN	-0.617933	-0.364704	0.496497	-0.796042	-0.457492	-0.861332	-1.2361	-1.65176	-0.748736	0.110939	0.701234	0.812767	0.406033	0.599315	6	3	5	4	0.526058	-0.693067	0.00108917	1.21912	SNX17_HUMAN Sorting nexin-17 OS=Homo sapiens GN=SNX17 PE=1 SV=1
P48556	PSMD8_HUMAN	0.0837605	-2.10516	-1.81112	-1.01278	-1.00799	-1.22308	-2.31466	-2.13342	-2.18765	0.0556385	-0.0659786	-0.197689	-0.66188	-0.658384	13	6	12	9	-0.305659	-1.52357	0.00732726	1.21791	PSMD8_HUMAN 26S proteasome non-ATPase regulatory subunit 8 OS=Homo sapiens GN=PSMD8 PE=1 SV=2
Q8WU76	SCFD2_HUMAN	-0.479064	0.686657	-1.00487	-2.66467	0.0577755	-0.0700755	-0.598501	-0.539829	-0.229099	-0.146504	1.11328	1.17244	0.63536	0.616961	2	5	2	3	0.678308	-0.537963	0.0206141	1.21627	SCFD2_HUMAN Sec1 family domain-containing protein 2 OS=Homo sapiens GN=SCFD2 PE=1 SV=2
P19174	PLCG1_HUMAN	0.3716	-1.20804	-1.90405	-1.20646	-1.34528	-0.893039	-1.50543	-1.18594	-0.891947	0.732569	0.1975	0.806552	-0.731051	-0.353466	1	2	12	7	0.130421	-1.0854	0.0053353	1.21582	PLCG1_HUMAN 1-phosphatidylinositol 4,5-bisphosphate phosphodiesterase gamma-1 OS=Homo sapiens GN=PLCG1 PE=1 SV=1
Q05655	KPCD_HUMAN	-1.0952	-0.49404	0.31062	-0.916671	-0.105463	-0.697497	-0.441263	-0.925348	-0.83064	-0.459331	0.617333	0.754629	1.14544	1.12562	6	8	9	4	0.636737	-0.577278	0.00139583	1.21402	KPCD_HUMAN Protein kinase C delta type OS=Homo sapiens GN=PRKCD PE=1 SV=2
Q9Y5Y2	NUBP2_HUMAN	-0.935996	-0.254255	-1.57122	0.0877942	1.01706	0.161633	0.419437	-0.110636	0.318008	-1.12529	1.00115	1.50514	2.21693	1.98617	5	7	5	6	1.11682	-0.0964637	0.0490227	1.21328	NUBP2_HUMAN Cytosolic Fe-S cluster assembly factor NUBP2 OS=Homo sapiens GN=NUBP2 PE=1 SV=1
Q9UJX4	APC5_HUMAN	-0.36107	-0.722119	0.542421	-0.477403	0.433702	0.696311	-0.530043	0.0450239	0.191019	0.884528	1.16897	2.29248	0.497077	1.11952	4	6	4	3	1.19252	-0.0202398	0.00259326	1.21276	APC5_HUMAN Anaphase-promoting complex subunit 5 OS=Homo sapiens GN=ANAPC5 PE=1 SV=2
P49023	PAXI_HUMAN	-1.91695	-0.238265	-0.333598	-1.0791	-0.880098	-0.710094	0.126824	0.118064	-0.0285581	1.0806	2.00803	0.764935	-0.203762	-0.336425	5	4	4	5	0.662676	-0.549086	0.0167616	1.21176	PAXI_HUMAN Paxillin OS=Homo sapiens GN=PXN PE=1 SV=3
Q8N335	GPD1L_HUMAN	-1.27492	-1.3892	0.150648	-2.02503	0.308605	-0.175045	-1.22568	-1.25487	-1.35251	-1.47091	0.257743	-0.269778	1.5046	1.44754	9	7	6	8	0.293839	-0.915333	0.0460965	1.20917	GPD1L_HUMAN Glycerol-3-phosphate dehydrogenase 1-like protein OS=Homo sapiens GN=GPD1L PE=1 SV=1
Q96BW5	PTER_HUMAN	-1.88821	-1.04924	-0.107324	-0.928462	-1.11695	-1.3033	-1.13688	-0.928879	-0.91033	0.800919	1.74351	0.781526	-1.24144	-1.26591	1	1	3	1	0.163722	-1.04106	0.0283418	1.20479	PTER_HUMAN Phosphotriesterase-related protein OS=Homo sapiens GN=PTER PE=1 SV=1
Q9UJX3	APC7_HUMAN	-1.41522	-0.574259	-1.39696	-0.397646	0.281574	0.0962133	-0.206551	-0.423023	-0.244784	0.298012	1.27992	0.847294	0.683955	0.53635	11	11	12	13	0.729105	-0.475628	0.00145368	1.20473	APC7_HUMAN Anaphase-promoting complex subunit 7 OS=Homo sapiens GN=ANAPC7 PE=1 SV=4
Q7Z6Z7	HUWE1_HUMAN	-0.954768	-0.914187	-1.71758	0.0608998	-0.0267245	-0.33138	-0.220129	-0.322866	-0.0144767	-0.0197456	0.320264	1.61866	0.742234	0.893808	43	33	37	31	0.711044	-0.493468	0.00364549	1.20451	HUWE1_HUMAN E3 ubiquitin-protein ligase HUWE1 OS=Homo sapiens GN=HUWE1 PE=1 SV=3
Q9UER7	DAXX_HUMAN	-1.15918	-0.282607	-0.852238	0.50841	0.966763	0.421673	-0.0924285	0.130845	0.60585	0.786625	1.74378	1.46596	1.33622	0.819081	6	6	4	4	1.23033	0.0274537	0.00452961	1.20288	DAXX_HUMAN Death domain-associated protein 6 OS=Homo sapiens GN=DAXX PE=1 SV=2
Q52LW3	RHG29_HUMAN	0.679011	-0.0151586	0.765587	-1.19099	-1.11483	-0.873316	-0.965181	-1.32765	-0.626588	2.4579	0.801188	0.211321	-0.234264	0.181797	2	3	4	6	0.683589	-0.518791	0.0330204	1.20238	RHG29_HUMAN Rho GTPase-activating protein 29 OS=Homo sapiens GN=ARHGAP29 PE=1 SV=2
Q9NV66	TYW1_HUMAN	-1.94563	-0.255568	0.195077	0.497914	-0.329988	-0.260049	-0.169843	-0.0501296	-0.232271	1.20138	1.46908	1.78125	-0.290638	0.425429	3	2	3	2	0.917301	-0.283388	0.0127697	1.20069	TYW1_HUMAN S-adenosyl-L-methionine-dependent tRNA 4-demethylwyosine synthase OS=Homo sapiens GN=TYW1 PE=2 SV=2
O94804	STK10_HUMAN	-1.13758	0.2141	-0.968655	0.555675	0.350631	0.379119	0.0368123	-0.250825	-0.0313828	-0.354935	0.0277217	3.03483	1.23648	1.58287	8	3	9	4	1.10539	-0.0946778	0.0370349	1.20007	STK10_HUMAN Serine/threonine-protein kinase 10 OS=Homo sapiens GN=STK10 PE=1 SV=1
Q5VT66	MARC1_HUMAN	-1.03397	0.896671	-1.10303	-1.7138	0.324738	0.15279	0.268183	-0.0786441	-0.027062	0.505569	1.49897	1.4614	0.72789	0.519552	6	5	5	3	0.942678	-0.257126	0.0135013	1.1998	MARC1_HUMAN Mitochondrial amidoxime-reducing component 1 OS=Homo sapiens GN=MARC1 PE=1 SV=1
Q8WUF5	IASPP_HUMAN	-0.310031	-0.0330394	-0.0696987	0.0686833	-0.34669	0.0531309	0.355591	0.12954	0.365067	1.55694	2.50413	0.723975	0.347243	0.973671	19	6	17	16	1.22119	0.0236169	0.00154126	1.19757	IASPP_HUMAN RelA-associated inhibitor OS=Homo sapiens GN=PPP1R13L PE=1 SV=4
Q8IWV7	UBR1_HUMAN	0.240696	-1.15252	-0.0572724	-0.782074	0.643543	0.592281	-1.22634	-1.51578	-0.982793	0.878788	1.12092	0.725771	0.192522	0.703489	4	5	5	1	0.724297	-0.471139	0.010448	1.19544	UBR1_HUMAN E3 ubiquitin-protein ligase UBR1 OS=Homo sapiens GN=UBR1 PE=1 SV=1
Q02241	KIF23_HUMAN	-0.684974	-0.968509	0.279688	-1.00148	1.18851	0.88176	1.40815	0.911157	0.583522	1.11321	0.675577	1.28206	2.21577	2.1317	54	23	32	31	1.48366	0.288648	0.0283216	1.19502	KIF23_HUMAN Kinesin-like protein KIF23 OS=Homo sapiens GN=KIF23 PE=1 SV=3
Q8IUD2	RB6I2_HUMAN	-1.94093	0.345889	0.450601	-0.304182	0.0462343	-0.109627	0.336764	0.380109	0.332741	2.13177	1.23462	1.02323	0.493024	0.835399	16	5	17	15	1.14361	-0.0513777	0.010761	1.19498	RB6I2_HUMAN ELKS/Rab6-interacting/CAST family member 1 OS=Homo sapiens GN=ERC1 PE=1 SV=1
P15923	TFE2_HUMAN	-1.62566	-0.655969	1.38258	0.228539	-0.292406	0.0154589	-0.22951	0.490185	1.13457	1.49341	2.05116	0.37103	1.03528	1.2697	1	2	6	1	1.24412	0.0497544	0.0236452	1.19436	TFE2_HUMAN Transcription factor E2-alpha OS=Homo sapiens GN=TCF3 PE=1 SV=1
Q6VN20	RBP10_HUMAN	0.769164	0.629423	-0.0518548	-2.14942	-0.0434331	0.0277618	-0.874877	-1.09476	-1.0766	0.517796	0.39769	2.59161	0.175193	0.14074	2	1	3	2	0.764606	-0.429399	0.0480142	1.194	RBP10_HUMAN Ran-binding protein 10 OS=Homo sapiens GN=RANBP10 PE=1 SV=1
P18085	ARF4_HUMAN	-2.79314	-0.750193	0.456218	-1.82383	-0.356622	-1.24804	-1.30727	-1.61192	-1.17784	0.437426	0.263044	-0.760199	0.487098	-0.355286	11	11	9	8	0.0144166	-1.17918	0.0221123	1.1936	ARF4_HUMAN ADP-ribosylation factor 4 OS=Homo sapiens GN=ARF4 PE=1 SV=3
Q13625	ASPP2_HUMAN	-0.336447	-0.583394	0.728007	-0.275782	0.165995	0.0479653	-0.130248	-0.210875	0.480871	1.91355	1.9821	0.413855	0.665248	0.925957	8	5	6	2	1.18014	-0.0126565	0.00185321	1.1928	ASPP2_HUMAN Apoptosis-stimulating of p53 protein 2 OS=Homo sapiens GN=TP53BP2 PE=1 SV=2
P52732	KIF11_HUMAN	-1.67824	-1.13272	-1.4633	-1.74249	-0.596285	-0.950628	-0.610118	-0.82767	-0.826175	0.186822	0.120498	0.342048	-0.107782	-0.0412592	26	14	21	13	0.100065	-1.09196	9.58926e-05	1.19202	KIF11_HUMAN Kinesin-like protein KIF11 OS=Homo sapiens GN=KIF11 PE=1 SV=2
O15013	ARHGA_HUMAN	-0.744125	-0.357503	-1.04221	2.03876	-1.58182	-0.565233	0.111162	-1.50298	-0.400534	-0.161077	0.9492	0.365685	0.983775	1.56798	3	4	1	3	0.741113	-0.449387	0.0465111	1.1905	ARHGA_HUMAN Rho guanine nucleotide exchange factor 10 OS=Homo sapiens GN=ARHGEF10 PE=1 SV=4
O95613	PCNT_HUMAN	-0.609175	0.220865	0.644387	-0.881449	0.386931	0.573524	0.749738	0.665704	0.448131	2.51694	1.30019	1.07602	1.09172	1.1818	34	22	13	7	1.43334	0.244295	0.00379493	1.18904	PCNT_HUMAN Pericentrin OS=Homo sapiens GN=PCNT PE=1 SV=4
Q9BXX3	AN30A_HUMAN	-0.463234	-1.03982	0.922248	-1.24282	0.316163	0.0871119	-0.396315	-0.649849	-0.495424	0.65265	0.816765	1.23348	0.542085	1.05085	1	1	1	1	0.859166	-0.329105	0.00301548	1.18827	AN30A_HUMAN Ankyrin repeat domain-containing protein 30A OS=Homo sapiens GN=ANKRD30A PE=2 SV=3
Q6NUQ1	RINT1_HUMAN	-1.30789	-0.588173	-0.441961	0.185367	-0.0898144	-0.523983	-0.712955	-0.543846	-0.474906	1.02599	1.0736	0.576717	0.609255	0.155913	3	3	3	1	0.688296	-0.499796	0.000178704	1.18809	RINT1_HUMAN RAD50-interacting protein 1 OS=Homo sapiens GN=RINT1 PE=1 SV=1
Q9UKT5	FBX4_HUMAN	0.479594	-0.854887	-0.327714	-2.13797	-1.65169	-1.69052	-1.69916	-1.06836	-1.97033	0.6681	1.63669	-0.282489	-1.17455	-0.974672	2	2	3	4	-0.025385	-1.21345	0.0495451	1.18806	FBX4_HUMAN F-box only protein 4 OS=Homo sapiens GN=FBXO4 PE=1 SV=2
Q00341	VIGLN_HUMAN	0.00532472	-0.848923	-0.0208831	-2.23177	-0.0124815	-0.289308	-0.386878	-0.381211	-0.0610732	-0.282322	0.798122	1.9913	0.444875	0.630586	52	30	48	55	0.716513	-0.469689	0.0153706	1.1862	VIGLN_HUMAN Vigilin OS=Homo sapiens GN=HDLBP PE=1 SV=2
Q07864	DPOE1_HUMAN	0.162292	-0.609323	-0.262592	-0.0582473	0.546425	1.14901	0.300272	0.355618	0.462422	1.48923	1.70166	0.915208	1.24471	1.70239	17	12	11	13	1.41064	0.22732	0.000565224	1.18332	DPOE1_HUMAN DNA polymerase epsilon catalytic subunit A OS=Homo sapiens GN=POLE PE=1 SV=5
Q14149	MORC3_HUMAN	-0.951274	-0.409808	0.0923118	-0.0115855	0.00195347	0.150069	-0.04359	-0.105653	-0.0863198	1.14148	1.29119	0.368154	1.07154	1.28222	8	7	5	1	1.03092	-0.151544	6.28973e-05	1.18246	MORC3_HUMAN MORC family CW-type zinc finger protein 3 OS=Homo sapiens GN=MORC3 PE=1 SV=3
Q5VIR6	VPS53_HUMAN	-0.014411	-0.605565	-2.64675	0.882208	-0.00142047	-0.439894	-0.960069	-1.21343	-0.746895	-0.352778	1.02733	0.478304	0.766605	0.798498	4	2	1	2	0.543592	-0.63847	0.0291149	1.18206	VPS53_HUMAN Vacuolar protein sorting-associated protein 53 homolog OS=Homo sapiens GN=VPS53 PE=1 SV=1
Q9BQ04	RBM4B_HUMAN	-1.2688	0.29211	1.34335	-0.367509	0.42111	0.836258	0.806376	0.840765	0.796862	1.28922	2.47253	1.18014	1.34517	1.67662	14	8	14	15	1.59274	0.411169	0.0116063	1.18157	RBM4B_HUMAN RNA-binding protein 4B OS=Homo sapiens GN=RBM4B PE=1 SV=1
Q9HCK8	CHD8_HUMAN	-0.78607	-0.547084	0.0307413	0.361133	0.804238	1.37931	1.12877	0.807895	1.14038	1.124	1.50949	1.21581	2.0683	2.38622	23	25	14	13	1.66077	0.479923	0.0109514	1.18084	CHD8_HUMAN Chromodomain-helicase-DNA-binding protein 8 OS=Homo sapiens GN=CHD8 PE=1 SV=5
Q96EA4	SPDLY_HUMAN	-1.05846	-0.293599	-0.855525	-0.865467	-1.16936	-1.23624	-2.23715	-1.75986	-1.67545	-0.2958	0.29662	0.917202	-0.637998	-0.572287	11	5	19	18	-0.0584526	-1.23901	0.00445204	1.18056	SPDLY_HUMAN Protein Spindly OS=Homo sapiens GN=SPDL1 PE=1 SV=2
Q15008	PSMD6_HUMAN	0.310046	-1.55193	-0.732013	-1.51202	-0.0102486	-0.620171	-0.818777	-1.09945	-1.06115	0.271678	-0.265374	0.542203	0.823684	0.576971	11	8	15	12	0.389832	-0.788413	0.00278136	1.17824	PSMD6_HUMAN 26S proteasome non-ATPase regulatory subunit 6 OS=Homo sapiens GN=PSMD6 PE=1 SV=1
Q5MIZ7	P4R3B_HUMAN	-1.23653	-1.65885	1.04923	-0.604026	-0.127938	0.034414	-0.515169	-0.534299	-0.13777	0.840638	0.525706	0.889626	1.16476	0.389334	2	4	3	3	0.762013	-0.414549	0.00742693	1.17656	P4R3B_HUMAN Serine/threonine-protein phosphatase 4 regulatory subunit 3B OS=Homo sapiens GN=PPP4R3B PE=1 SV=2
Q4V326	GAG2E_HUMAN	0.465214	-0.949216	-1.86186	-2.6571	-0.565206	-0.354915	-0.286703	-0.815147	-0.344456	1.42724	0.0079385	1.29684	-0.70976	-0.24663	1	3	8	4	0.355124	-0.818821	0.0446215	1.17395	GAG2E_HUMAN G antigen 2E OS=Homo sapiens GN=GAGE2E PE=3 SV=1
O94829	IPO13_HUMAN	-0.308823	-0.624381	-0.109588	0.0767952	-0.692402	-0.82709	-0.366204	-0.857966	-0.321808	0.767323	0.0900947	1.5145	0.487492	0.767328	2	4	3	1	0.725347	-0.447941	0.000201898	1.17329	IPO13_HUMAN Importin-13 OS=Homo sapiens GN=IPO13 PE=1 SV=3
P17655	CAN2_HUMAN	0.557733	-2.82109	-2.13535	-2.3643	-1.06343	-1.17787	-1.81679	-1.50761	-1.64201	-0.806601	-0.554563	0.199469	-0.512794	-0.260589	23	18	22	22	-0.387016	-1.5523	0.0258055	1.16529	CAN2_HUMAN Calpain-2 catalytic subunit OS=Homo sapiens GN=CAPN2 PE=1 SV=6
Q5T1M5	FKB15_HUMAN	-0.739575	-1.18271	-0.659417	-0.933097	-1.5342	-1.65534	-0.529697	-0.472858	-0.500333	-1.11999	0.330086	1.77791	0.0529965	0.225731	8	10	10	10	0.253347	-0.911914	0.0113507	1.16526	FKB15_HUMAN FK506-binding protein 15 OS=Homo sapiens GN=FKBP15 PE=1 SV=2
Q7KZF4	SND1_HUMAN	-0.982099	-0.995048	-0.896918	-0.311287	0.506741	0.0903698	0.00563254	0.196767	0.108577	-0.0296227	0.912811	1.51027	0.904367	1.26243	58	38	46	51	0.912052	-0.253029	0.00341988	1.16508	SND1_HUMAN Staphylococcal nuclease domain-containing protein 1 OS=Homo sapiens GN=SND1 PE=1 SV=1
P21359	NF1_HUMAN	-1.2623	-0.836495	-1.9127	-0.51617	-0.0649787	-0.417667	0.0843526	0.358614	0.574725	1.26183	1.80869	0.41923	0.220322	-0.107367	12	10	10	3	0.720542	-0.443624	0.0222398	1.16417	NF1_HUMAN Neurofibromin OS=Homo sapiens GN=NF1 PE=1 SV=2
Q4V328	GRAP1_HUMAN	-2.35968	0.0236648	-0.230079	0.905577	-0.126334	0.207521	-0.0121464	-0.222971	-0.0565772	0.154653	1.43378	1.73683	0.552769	0.895419	6	6	10	11	0.954689	-0.207892	0.0239455	1.16258	GRAP1_HUMAN GRIP1-associated protein 1 OS=Homo sapiens GN=GRIPAP1 PE=1 SV=1
Q96F07	CYFP2_HUMAN	-0.569429	-1.44261	-1.12051	-1.18502	-0.245906	-0.820954	-0.368146	-0.719591	-0.460879	-0.272295	0.73898	1.80053	-0.00650752	-0.305217	10	9	8	10	0.391099	-0.770338	0.00532227	1.16144	CYFP2_HUMAN Cytoplasmic FMR1-interacting protein 2 OS=Homo sapiens GN=CYFIP2 PE=1 SV=2
Q06546	GABPA_HUMAN	-0.214957	-0.193351	0.804921	-1.12334	0.0441848	-0.108881	-0.0877909	-0.472458	-0.42861	0.576211	1.05104	0.83594	1.00406	1.34902	4	6	8	7	0.963254	-0.197809	0.00055035	1.16106	GABPA_HUMAN GA-binding protein alpha chain OS=Homo sapiens GN=GABPA PE=1 SV=1
Q16566	KCC4_HUMAN	-0.39071	-0.154328	-1.62858	-1.42244	-0.475493	-0.607731	-1.00456	-1.14456	-0.748589	0.025119	1.09127	0.398434	0.00968167	0.0713318	3	1	4	3	0.319167	-0.841888	0.00100708	1.16106	KCC4_HUMAN Calcium/calmodulin-dependent protein kinase type IV OS=Homo sapiens GN=CAMK4 PE=1 SV=1
P21399	ACOC_HUMAN	-2.09456	-1.64267	-2.0004	-1.58217	-0.730765	-1.16754	-1.17212	-0.782585	-0.781157	-1.45889	0.0297918	0.602038	-0.00455278	-0.00997761	28	20	19	18	-0.168319	-1.32822	0.00552286	1.1599	ACOC_HUMAN Cytoplasmic aconitate hydratase OS=Homo sapiens GN=ACO1 PE=1 SV=3
Q9H4H8	FA83D_HUMAN	-1.57167	-1.17663	0.238193	0.954946	-0.265478	-0.313327	0.308209	0.85803	0.795472	1.80777	1.48338	0.941606	0.968525	0.502133	6	1	4	4	1.14068	-0.0191391	0.02191	1.15982	FA83D_HUMAN Protein FAM83D OS=Homo sapiens GN=FAM83D PE=1 SV=3
Q63ZY3	KANK2_HUMAN	-0.838257	1.18311	-0.320248	0.0391415	0.519116	0.339119	-0.21909	-0.433851	0.195122	1.72933	1.57889	0.228267	1.19006	1.32691	20	13	19	23	1.21069	0.0515732	0.00436369	1.15912	KANK2_HUMAN KN motif and ankyrin repeat domain-containing protein 2 OS=Homo sapiens GN=KANK2 PE=1 SV=1
Q9BUE0	MED18_HUMAN	-2.78449	0.0630295	0.327066	-0.409519	-0.468594	-0.57639	-0.303721	-1.11351	-0.395251	0.506587	1.07643	-0.0486136	0.631332	0.482659	3	1	2	1	0.529678	-0.629042	0.019674	1.15872	MED18_HUMAN Mediator of RNA polymerase II transcription subunit 18 OS=Homo sapiens GN=MED18 PE=1 SV=1
Q96PU5	NED4L_HUMAN	-1.02757	-0.28065	-0.652973	0.505273	-0.601576	-0.727103	0.253396	0.0986443	0.666672	0.90423	1.82342	0.807388	0.537032	0.737848	5	4	4	3	0.961983	-0.196209	0.00331305	1.15819	NED4L_HUMAN E3 ubiquitin-protein ligase NEDD4-like OS=Homo sapiens GN=NEDD4L PE=1 SV=2
Q9Y4F3	MARF1_HUMAN	-0.396306	-1.25624	0.435406	0.288233	-0.907133	-0.0592078	0.408926	0.721144	0.545611	1.32245	1.36839	1.41227	0.163709	1.40155	2	4	2	1	1.13367	-0.0243967	0.00737945	1.15807	MARF1_HUMAN Meiosis arrest female protein 1 OS=Homo sapiens GN=KIAA0430 PE=1 SV=6
Q9BX40	LS14B_HUMAN	-1.39646	-0.310245	-0.427375	-2.37329	0.565041	0.456271	-0.589868	-0.5309	-0.31829	-0.807378	0.243624	1.72615	0.821336	1.06607	6	6	4	3	0.60996	-0.547234	0.04281	1.15719	LS14B_HUMAN Protein LSM14 homolog B OS=Homo sapiens GN=LSM14B PE=1 SV=1
P52701	MSH6_HUMAN	-1.79498	-0.206151	1.95134	0.131134	1.10037	0.847637	0.714973	0.319167	1.07693	0.886999	1.97742	0.910784	2.17183	2.13536	40	38	30	35	1.61648	0.460047	0.0478443	1.15643	MSH6_HUMAN DNA mismatch repair protein Msh6 OS=Homo sapiens GN=MSH6 PE=1 SV=2
Q6ZUT9	DEN5B_HUMAN	-0.898928	-0.793849	-0.535616	-1.17349	1.05353	0.6851	-0.424616	0.252597	-0.416821	0.289119	1.80389	0.164141	1.31624	0.954724	3	5	2	2	0.905624	-0.250232	0.0152335	1.15586	DEN5B_HUMAN DENN domain-containing protein 5B OS=Homo sapiens GN=DENND5B PE=1 SV=2
P51784	UBP11_HUMAN	0.167475	-0.24158	-0.525257	-1.27732	-0.117605	-0.364313	-1.18279	-1.04807	-0.857634	-0.701753	0.993167	1.17243	0.456178	0.81681	4	9	6	5	0.547367	-0.605232	0.0048127	1.1526	UBP11_HUMAN Ubiquitin carboxyl-terminal hydrolase 11 OS=Homo sapiens GN=USP11 PE=1 SV=3
O75962	TRIO_HUMAN	-1.42838	-0.734792	-0.340306	-0.126894	0.16037	0.139996	-0.0889592	-0.272198	-0.0478039	0.0629724	0.327052	1.78445	0.927312	1.13844	40	31	36	21	0.848046	-0.30433	0.00338075	1.15238	TRIO_HUMAN Triple functional domain protein OS=Homo sapiens GN=TRIO PE=1 SV=2
P98170	XIAP_HUMAN	-0.825314	-0.749014	-1.32152	-0.0752824	-0.950688	-0.950014	-0.88884	-0.809966	-0.708749	0.39711	2.78957	-0.0188485	-1.0466	-0.406354	3	1	3	3	0.342977	-0.808821	0.0384791	1.1518	XIAP_HUMAN E3 ubiquitin-protein ligase XIAP OS=Homo sapiens GN=XIAP PE=1 SV=2
P13489	RINI_HUMAN	-0.407415	-1.56036	-0.957145	-1.46291	-0.231296	-0.478555	-0.119455	-0.158016	-0.149186	-0.209856	1.3528	0.239262	0.673624	0.62641	12	11	12	12	0.536448	-0.613815	0.00367913	1.15026	RINI_HUMAN Ribonuclease inhibitor OS=Homo sapiens GN=RNH1 PE=1 SV=2
Q14155	ARHG7_HUMAN	-1.02078	-1.13344	0.320943	-1.09061	-0.928076	-1.22915	-1.78413	-1.86351	-0.144301	0.422448	1.09651	0.0488521	-0.387304	-0.358702	1	2	5	3	0.164361	-0.985895	0.00988123	1.15026	ARHG7_HUMAN Rho guanine nucleotide exchange factor 7 OS=Homo sapiens GN=ARHGEF7 PE=1 SV=2
A2RTX5	SYTC2_HUMAN	-0.58868	-1.57903	-1.43152	-1.69847	-1.46156	-1.97503	-0.959856	-0.705758	-1.65276	-0.127409	0.13053	0.748801	-0.499668	-1.20302	1	1	2	1	-0.190154	-1.33919	0.00365157	1.14903	SYTC2_HUMAN Probable threonine--tRNA ligase 2, cytoplasmic OS=Homo sapiens GN=TARSL2 PE=1 SV=1
Q9NRY4	RHG35_HUMAN	-0.0187009	-0.469641	-1.37226	-0.876432	-0.158917	-0.4715	-0.0734337	0.539741	0.475221	0.00945046	1.09726	1.46625	0.693553	1.12645	9	10	12	6	0.878592	-0.269547	0.00466554	1.14814	RHG35_HUMAN Rho GTPase-activating protein 35 OS=Homo sapiens GN=ARHGAP35 PE=1 SV=3
P57737	CORO7_HUMAN	-0.27767	-0.117351	-1.7431	0.951925	-0.209532	-0.157567	-0.0807801	-0.164013	-0.682023	-0.00575861	0.966765	1.32593	0.62374	1.45009	5	9	2	4	0.872154	-0.275568	0.00925792	1.14772	CORO7_HUMAN Coronin-7 OS=Homo sapiens GN=CORO7 PE=1 SV=2
Q5TC12	ATPF1_HUMAN	-1.13508	-1.33138	-0.0826555	-0.635511	-0.592519	-0.655592	-1.76371	-0.80937	-1.24427	0.505327	1.7258	0.655592	-0.981373	-0.750506	2	8	3	3	0.230968	-0.916676	0.0190217	1.14764	ATPF1_HUMAN ATP synthase mitochondrial F1 complex assembly factor 1 OS=Homo sapiens GN=ATPAF1 PE=1 SV=1
Q8N8R7	AL14E_HUMAN	-1.15013	0.16658	-0.48568	-1.13959	-0.329334	-0.60758	0.177521	-0.569112	-0.191295	0.183128	1.77439	0.0258937	0.986579	0.470928	3	1	1	3	0.688184	-0.458736	0.0035108	1.14692	AL14E_HUMAN ARL14 effector protein OS=Homo sapiens GN=ARL14EP PE=1 SV=1
P12955	PEPD_HUMAN	-0.935114	-0.550356	-1.60739	0.634392	-2.03393	-2.02033	-1.53416	-1.4463	-1.38903	0.446471	0.507916	0.67219	-1.07376	-0.868601	5	2	7	7	-0.0631561	-1.20914	0.0302409	1.14598	PEPD_HUMAN Xaa-Pro dipeptidase OS=Homo sapiens GN=PEPD PE=1 SV=3
Q13322	GRB10_HUMAN	-0.698247	0.262124	0.182684	0.597768	-0.88189	-0.648515	-0.76838	0.354595	-0.479779	1.53312	0.577642	0.598927	0.846429	1.01824	1	1	1	1	0.914872	-0.231071	0.00187705	1.14594	GRB10_HUMAN Growth factor receptor-bound protein 10 OS=Homo sapiens GN=GRB10 PE=1 SV=2
O95071	UBR5_HUMAN	-1.56911	-0.983027	0.931715	0.539589	0.933387	0.76339	0.522186	0.3643	0.638972	0.751409	1.61102	1.04639	1.60512	1.89843	39	32	17	12	1.38248	0.237934	0.0213951	1.14454	UBR5_HUMAN E3 ubiquitin-protein ligase UBR5 OS=Homo sapiens GN=UBR5 PE=1 SV=2
Q8TDM6	DLG5_HUMAN	-0.690466	-0.616921	-0.280712	-0.353725	0.791284	0.607764	1.16714	1.53523	1.74739	2.47294	1.05419	1.85328	1.18226	1.31778	4	3	6	2	1.57609	0.434109	0.0316496	1.14198	DLG5_HUMAN Disks large homolog 5 OS=Homo sapiens GN=DLG5 PE=1 SV=4
O95786	DDX58_HUMAN	-0.757712	-1.30991	-0.857486	-1.47401	0.532739	0.00316537	-0.157588	-0.0592999	0.108562	-0.0932306	0.511316	1.54159	1.08802	0.433585	6	4	1	1	0.696256	-0.441281	0.0100771	1.13754	DDX58_HUMAN Probable ATP-dependent RNA helicase DDX58 OS=Homo sapiens GN=DDX58 PE=1 SV=2
Q9GZS3	WDR61_HUMAN	-1.69902	-0.272895	-2.4405	-1.57083	0.13433	-0.223074	-0.392813	-0.319896	-0.233485	-0.585972	1.19116	0.533795	0.268139	0.372549	12	12	6	12	0.355934	-0.779799	0.027553	1.13573	WDR61_HUMAN WD repeat-containing protein 61 OS=Homo sapiens GN=WDR61 PE=1 SV=1
Q86YQ8	CPNE8_HUMAN	-0.790333	-0.86817	0.748635	-0.62314	-1.14563	-0.887916	-0.716526	-1.21998	-0.85273	0.581934	1.29063	1.03434	-0.560675	-0.218321	9	9	5	3	0.425581	-0.706199	0.0094901	1.13178	CPNE8_HUMAN Copine-8 OS=Homo sapiens GN=CPNE8 PE=1 SV=2
Q99661	KIF2C_HUMAN	-1.25894	-1.01581	0.726533	-2.31506	0.137338	0.16167	0.48287	0.53227	0.465046	0.680563	1.2854	0.300893	1.19513	1.03608	25	17	17	18	0.899613	-0.231565	0.0413741	1.13118	KIF2C_HUMAN Kinesin-like protein KIF2C OS=Homo sapiens GN=KIF2C PE=1 SV=2
Q12980	NPRL3_HUMAN	-0.462134	-0.402695	-0.78568	-0.470723	-0.210661	-0.209632	-0.522569	-0.811202	-1.20751	-0.386719	-0.22324	1.48962	0.955416	0.993954	1	4	1	2	0.565807	-0.564756	0.00286425	1.13056	NPRL3_HUMAN Nitrogen permease regulator 3-like protein OS=Homo sapiens GN=NPRL3 PE=1 SV=1
O14545	TRAD1_HUMAN	-0.697731	-0.832499	0.869317	-0.63625	0.0505821	0.0925014	0.764863	0.972144	0.982837	1.49161	1.11519	1.571	0.748197	1.58833	2	2	3	6	1.30287	0.173974	0.00914892	1.12889	TRAD1_HUMAN TRAF-type zinc finger domain-containing protein 1 OS=Homo sapiens GN=TRAFD1 PE=1 SV=1
P49137	MAPK2_HUMAN	-1.2423	-1.26115	0.991396	-1.91382	-0.585488	-0.368061	0.0931276	0.116419	0.0896658	0.686864	2.04855	0.380368	0.00937404	0.229859	5	4	5	8	0.671002	-0.453357	0.038708	1.12436	MAPK2_HUMAN MAP kinase-activated protein kinase 2 OS=Homo sapiens GN=MAPKAPK2 PE=1 SV=1
P25685	DNJB1_HUMAN	-0.282016	-0.820222	0.10404	-0.375377	-0.448516	-0.498198	-0.466933	-0.477863	-0.653897	0.64	1.30356	0.99927	0.176052	0.321844	17	9	11	17	0.688146	-0.435442	7.16486e-05	1.12359	DNJB1_HUMAN DnaJ homolog subfamily B member 1 OS=Homo sapiens GN=DNAJB1 PE=1 SV=4
Q9P0V3	SH3B4_HUMAN	-0.895769	0.0785953	0.502681	-0.285092	0.881309	0.185292	0.42211	0.277295	0.429826	0.747175	1.53042	0.488587	1.88677	1.84613	19	15	14	12	1.29982	0.177361	0.00371121	1.12245	SH3B4_HUMAN SH3 domain-binding protein 4 OS=Homo sapiens GN=SH3BP4 PE=1 SV=1
Q8N8A2	ANR44_HUMAN	0.304014	-1.90453	-0.336898	-0.437744	-0.0141632	0.169275	0.190284	-0.848073	0.04395	0.78841	0.726626	0.88232	0.705455	0.934402	3	3	2	1	0.807443	-0.314876	0.00435204	1.12232	ANR44_HUMAN Serine/threonine-protein phosphatase 6 regulatory ankyrin repeat subunit B OS=Homo sapiens GN=ANKRD44 PE=1 SV=3
Q05209	PTN12_HUMAN	-0.132743	-1.4539	0.800007	-0.997554	-0.749142	-1.01599	-0.97657	-1.40651	-1.24893	0.840468	0.179079	-0.0178545	0.321698	0.295503	4	6	11	8	0.323779	-0.797926	0.00665144	1.1217	PTN12_HUMAN Tyrosine-protein phosphatase non-receptor type 12 OS=Homo sapiens GN=PTPN12 PE=1 SV=3
O60344	ECE2_HUMAN	-0.884428	-0.928018	-0.245917	0.660051	-0.772344	-1.41305	-1.90299	-1.18493	-2.08504	1.22915	0.341779	-0.182164	-0.18991	-0.459547	1	2	2	2	0.147861	-0.972963	0.024928	1.12082	ECE2_HUMAN Endothelin-converting enzyme 2 OS=Homo sapiens GN=ECE2 PE=1 SV=4
O14787	TNPO2_HUMAN	0.917095	-1.18236	-1.037	-0.917792	0.0462583	-0.446127	-1.25831	-1.75014	-1.21708	-0.275963	1.06241	-0.0178662	0.728737	0.292538	9	9	9	9	0.357971	-0.760607	0.0181558	1.11858	TNPO2_HUMAN Transportin-2 OS=Homo sapiens GN=TNPO2 PE=1 SV=3
O60502	OGA_HUMAN	-0.516835	-1.24238	-1.18425	-0.0591291	-0.554635	-0.842866	-0.907179	-1.15782	-0.902692	-0.390627	0.609904	0.498957	0.411346	0.36613	19	15	27	24	0.299142	-0.818643	0.00023745	1.11779	OGA_HUMAN Protein O-GlcNAcase OS=Homo sapiens GN=MGEA5 PE=1 SV=2
Q7Z569	BRAP_HUMAN	-1.47778	-0.954634	-2.26034	-0.185533	-0.248166	-0.121423	-1.19778	-1.65631	-0.744334	0.341875	0.495093	-0.486272	0.327273	-0.00450783	3	2	4	4	0.134692	-0.982922	0.00894579	1.11761	BRAP_HUMAN BRCA1-associated protein OS=Homo sapiens GN=BRAP PE=1 SV=2
G3V1V0	G3V1V0_HUMAN	-0.251539	0.84509	-1.12451	-1.3881	0.145034	-0.221245	0.0998456	-0.413185	0.503866	1.04651	-0.586363	1.40737	1.94429	0.753255	2	2	1	1	0.913013	-0.200527	0.0284058	1.11354	G3V1V0_HUMAN Myosin light polypeptide 6 OS=Homo sapiens GN=MYL6 PE=1 SV=1
Q15628	TRADD_HUMAN	-1.22109	-0.290358	-0.714569	-0.0675637	0.0981096	-0.365118	-0.4185	0.0939703	-0.32413	0.400573	1.00784	1.75464	0.442419	0.177695	4	6	1	2	0.756632	-0.356583	0.00178398	1.11321	TRADD_HUMAN Tumor necrosis factor receptor type 1-associated DEATH domain protein OS=Homo sapiens GN=TRADD PE=1 SV=2
P82094	TMF1_HUMAN	-1.59778	-0.491026	-1.59203	-2.07008	-1.4881	-1.41576	-1.66126	-1.85706	-1.24685	-0.244023	-0.167651	0.373337	-1.03063	-0.824561	6	2	13	5	-0.378705	-1.49111	0.00146825	1.1124	TMF1_HUMAN TATA element modulatory factor OS=Homo sapiens GN=TMF1 PE=1 SV=2
O15083	ERC2_HUMAN	-1.80786	-0.221238	-0.651977	-0.027467	-0.593283	-1.21681	0.143266	0.0226389	0.445733	2.3586	1.18332	-0.0762437	-0.104846	0.0306045	6	1	5	1	0.678286	-0.434111	0.0379632	1.1124	ERC2_HUMAN ERC protein 2 OS=Homo sapiens GN=ERC2 PE=1 SV=3
P46734	MP2K3_HUMAN	-1.74576	-0.0824312	0.652007	-0.705257	0.73603	0.339164	0.433644	-0.0723824	0.148638	-0.0489691	0.600704	1.6456	1.49472	1.69828	8	10	2	9	1.07807	-0.0329275	0.0246235	1.111	MP2K3_HUMAN Dual specificity mitogen-activated protein kinase kinase 3 OS=Homo sapiens GN=MAP2K3 PE=1 SV=2
P07947	YES_HUMAN	-0.694296	-0.198646	-0.362887	-2.11956	0.621463	1.03665	-0.625692	-0.768393	-1.14521	1.09905	-0.231169	0.982537	0.415769	0.917748	2	3	2	1	0.636788	-0.472951	0.032231	1.10974	YES_HUMAN Tyrosine-protein kinase Yes OS=Homo sapiens GN=YES1 PE=1 SV=3
O43847	NRDC_HUMAN	0.346077	-1.83207	-1.17077	-1.33149	-1.46577	-1.45664	-1.71023	-1.52493	-1.70657	-0.46822	0.250562	0.928273	-0.934272	-0.835046	12	12	17	12	-0.211741	-1.31693	0.0155235	1.10519	NRDC_HUMAN Nardilysin OS=Homo sapiens GN=NRDC PE=1 SV=2
Q9UID3	VPS51_HUMAN	-0.197175	-0.202956	-0.590613	-0.0100654	0.121134	-0.496242	-0.776403	-0.794766	-0.534262	1.16416	1.42008	0.110825	0.326883	0.564995	8	5	3	7	0.717387	-0.386816	0.000486792	1.1042	VPS51_HUMAN Vacuolar protein sorting-associated protein 51 homolog OS=Homo sapiens GN=VPS51 PE=1 SV=2
P54278	PMS2_HUMAN	-0.702333	0.265014	0.408515	-0.316195	0.317971	-0.000749353	-0.0245722	0.110417	0.299878	0.752475	1.52976	1.18312	1.35024	0.899862	8	8	3	2	1.14309	0.0397717	9.32697e-05	1.10332	PMS2_HUMAN Mismatch repair endonuclease PMS2 OS=Homo sapiens GN=PMS2 PE=1 SV=2
Q567U6	CCD93_HUMAN	-0.444732	-0.269222	0.337653	-1.34386	-0.462726	-0.754552	-1.10156	-1.25768	-0.895659	0.662917	0.289643	0.976704	-0.027788	0.172614	6	4	8	5	0.414818	-0.688037	0.00181826	1.10286	CCD93_HUMAN Coiled-coil domain-containing protein 93 OS=Homo sapiens GN=CCDC93 PE=1 SV=2
Q9Y4P8	WIPI2_HUMAN	0.362966	0.121811	-0.112901	-0.877086	-0.0758973	-0.197327	-0.588469	-1.1351	-0.440536	1.03525	1.14775	1.68669	-0.122257	0.127581	2	2	2	1	0.775002	-0.326949	0.00547813	1.10195	WIPI2_HUMAN WD repeat domain phosphoinositide-interacting protein 2 OS=Homo sapiens GN=WIPI2 PE=1 SV=1
Q8N3D4	EH1L1_HUMAN	0.188705	-0.899743	-1.13521	-0.400879	-1.27843	-1.08439	-0.96432	-1.31419	-1.01522	0.117387	0.101142	1.39216	-0.537066	0.0442407	20	18	23	26	0.223572	-0.878187	0.00450138	1.10176	EH1L1_HUMAN EH domain-binding protein 1-like protein 1 OS=Homo sapiens GN=EHBP1L1 PE=1 SV=2
Q9Y248	PSF2_HUMAN	-0.655947	-2.04194	0.00133649	-0.15705	-0.812292	-0.811416	-2.4382	-1.81262	-1.07771	1.268	0.691665	-0.507422	-0.302185	-1.0894	2	2	2	1	0.0121318	-1.08954	0.0442359	1.10167	PSF2_HUMAN DNA replication complex GINS protein PSF2 OS=Homo sapiens GN=GINS2 PE=1 SV=1
Q86W92	LIPB1_HUMAN	-0.470675	-0.248628	-0.839916	-1.32966	-0.224893	0.0708512	0.0712686	0.0193959	0.131118	0.655772	0.787435	1.70356	0.0599667	0.700717	18	15	17	10	0.781491	-0.313459	0.00293341	1.09495	LIPB1_HUMAN Liprin-beta-1 OS=Homo sapiens GN=PPFIBP1 PE=1 SV=2
Q08AM6	VAC14_HUMAN	0.404912	-0.903902	-2.14402	-1.56453	-0.418687	-0.787341	-0.373934	-0.377174	-0.137918	0.29654	-0.122829	1.89532	-0.273854	0.177486	4	4	6	6	0.394532	-0.700288	0.0308556	1.09482	VAC14_HUMAN Protein VAC14 homolog OS=Homo sapiens GN=VAC14 PE=1 SV=1
Q9NUW8	TYDP1_HUMAN	-0.735652	0.429086	-1.5693	-2.12289	-0.486875	-0.13002	-0.492332	-0.397449	-0.513924	-0.194155	-0.317339	0.743592	0.591123	1.30484	1	2	5	2	0.425612	-0.668818	0.0199791	1.09443	TYDP1_HUMAN Tyrosyl-DNA phosphodiesterase 1 OS=Homo sapiens GN=TDP1 PE=1 SV=2
Q15154	PCM1_HUMAN	-1.74064	-0.0988385	-0.614309	-0.0750609	0.625432	0.982538	0.613436	0.457887	1.29274	1.71364	1.76359	0.0442655	1.4435	1.30677	29	16	20	19	1.25435	0.160353	0.040691	1.094	PCM1_HUMAN Pericentriolar material 1 protein OS=Homo sapiens GN=PCM1 PE=1 SV=4
Q9BUI4	RPC3_HUMAN	-0.604998	-0.909519	-0.711399	-1.33706	0.623476	0.432742	0.57188	0.569515	0.199466	0.910803	1.32764	0.39257	1.01105	1.17495	10	7	11	10	0.963403	-0.129544	0.011019	1.09295	RPC3_HUMAN DNA-directed RNA polymerase III subunit RPC3 OS=Homo sapiens GN=POLR3C PE=1 SV=1
Q92615	LAR4B_HUMAN	-1.93708	-0.984814	0.18018	-0.243651	0.915602	0.645857	0.629748	0.770202	0.77994	0.974394	1.37899	1.29903	1.03661	1.19442	13	6	9	8	1.17669	0.0839979	0.0310272	1.09269	LAR4B_HUMAN La-related protein 4B OS=Homo sapiens GN=LARP4B PE=1 SV=3
Q05086	UBE3A_HUMAN	0.268618	-1.13257	-0.0123663	-1.29106	-0.561369	-0.540681	0.384502	0.415355	-0.194219	0.930967	1.26973	1.01811	0.0933794	0.656621	4	2	8	2	0.793761	-0.295977	0.00544545	1.08974	UBE3A_HUMAN Ubiquitin-protein ligase E3A OS=Homo sapiens GN=UBE3A PE=1 SV=4
Q7Z4Q2	HEAT3_HUMAN	-0.146156	-0.962052	0.145946	-0.957546	-0.0596216	-0.26159	-0.833878	-0.839303	-0.835943	0.359629	1.44511	0.310075	0.297732	0.396082	8	9	5	6	0.561725	-0.527794	0.00111955	1.08952	HEAT3_HUMAN HEAT repeat-containing protein 3 OS=Homo sapiens GN=HEATR3 PE=1 SV=2
O00443	P3C2A_HUMAN	-1.78427	0.0124711	0.988218	0.179598	0.393327	0.279837	-0.161328	-0.0436055	-0.13009	1.71214	1.71293	0.284391	0.876867	0.712861	13	9	7	6	1.05984	-0.029538	0.0177287	1.08938	P3C2A_HUMAN Phosphatidylinositol 4-phosphate 3-kinase C2 domain-containing subunit alpha OS=Homo sapiens GN=PIK3C2A PE=1 SV=2
Q15042	RB3GP_HUMAN	0.0572233	-0.7988	-0.327398	-1.80457	-0.498423	-1.19873	-1.51974	-1.72284	-1.56643	0.689975	-0.0590307	0.777992	-0.380784	-0.793232	11	11	11	8	0.046984	-1.04219	0.0136822	1.08917	RB3GP_HUMAN Rab3 GTPase-activating protein catalytic subunit OS=Homo sapiens GN=RAB3GAP1 PE=1 SV=3
Q96PZ0	PUS7_HUMAN	0.486481	-1.51704	-1.2452	-1.20327	-1.58833	-1.63069	-2.19261	-2.2095	-1.92501	-0.791368	-0.761316	1.06434	-0.741336	-0.560947	18	11	15	19	-0.358126	-1.44724	0.0324291	1.08912	PUS7_HUMAN Pseudouridylate synthase 7 homolog OS=Homo sapiens GN=PUS7 PE=1 SV=2
O95819	M4K4_HUMAN	-0.928285	-0.499598	0.471211	-0.134389	0.0771402	0.155249	-0.0326188	-0.431346	0.100209	0.822144	0.572356	1.15087	0.799202	1.41871	11	8	10	6	0.952657	-0.135825	0.000328354	1.08848	M4K4_HUMAN Mitogen-activated protein kinase kinase kinase kinase 4 OS=Homo sapiens GN=MAP4K4 PE=1 SV=2
Q9NR46	SHLB2_HUMAN	-0.414156	-0.647504	-0.0199733	0.0964403	-0.640659	-0.647891	-1.0753	-1.84172	-1.37957	-0.870255	0.64127	0.509413	0.536435	0.971575	10	2	8	10	0.357687	-0.730039	0.0112806	1.08773	SHLB2_HUMAN Endophilin-B2 OS=Homo sapiens GN=SH3GLB2 PE=1 SV=1
P42345	MTOR_HUMAN	-0.819899	-0.891641	-0.464686	-1.00641	-0.148954	-0.304532	-0.496227	-0.550438	-0.382788	0.170734	0.434036	0.98177	0.490638	0.538298	26	19	26	23	0.523095	-0.562842	2.05436e-05	1.08594	MTOR_HUMAN Serine/threonine-protein kinase mTOR OS=Homo sapiens GN=MTOR PE=1 SV=1
Q9UKN8	TF3C4_HUMAN	-1.68759	-0.163689	0.374362	-0.559276	0.851709	0.608532	0.105046	0.105303	0.398836	0.799583	2.0862	0.0284424	1.17478	1.35632	34	28	26	27	1.08906	0.00369237	0.0246026	1.08537	TF3C4_HUMAN General transcription factor 3C polypeptide 4 OS=Homo sapiens GN=GTF3C4 PE=1 SV=2
Q7Z6J0	SH3R1_HUMAN	-1.3249	0.11371	0.621859	-0.547409	-0.465555	-0.815015	-1.11985	-0.766874	-1.41856	0.169625	1.83959	-0.386084	0.401038	0.219638	2	5	1	2	0.448761	-0.635844	0.0200219	1.08461	SH3R1_HUMAN E3 ubiquitin-protein ligase SH3RF1 OS=Homo sapiens GN=SH3RF1 PE=1 SV=2
Q3V6T2	GRDN_HUMAN	-0.916679	0.231857	0.752094	-0.76227	-0.316544	-0.301592	-0.0410457	-0.671608	-0.0406688	0.982481	0.968434	1.46158	0.217082	0.629498	21	11	13	13	0.851814	-0.229606	0.00237273	1.08142	GRDN_HUMAN Girdin OS=Homo sapiens GN=CCDC88A PE=1 SV=2
Q92966	SNPC3_HUMAN	-1.06572	0.490798	-1.35788	-1.02377	0.807746	0.605502	0.52717	-0.722129	-0.115752	1.081	0.564679	1.30508	0.574073	0.851428	2	4	1	1	0.875251	-0.206003	0.0189021	1.08125	SNPC3_HUMAN snRNA-activating protein complex subunit 3 OS=Homo sapiens GN=SNAPC3 PE=1 SV=1
Q9Y6W3	CAN7_HUMAN	-1.22371	0.217261	0.0109679	-2.17198	-0.741555	-0.261093	-0.994156	-0.0743893	-0.994043	1.64999	0.594214	-0.220371	-0.600846	0.514041	4	6	1	1	0.387406	-0.692522	0.0310598	1.07993	CAN7_HUMAN Calpain-7 OS=Homo sapiens GN=CAPN7 PE=1 SV=1
Q9H4G0	E41L1_HUMAN	-1.17293	-0.307095	-0.731831	-1.17402	-0.529368	-0.64694	-0.714672	-0.674966	-0.935196	-1.24381	0.786098	1.36665	0.3311	0.329608	22	15	25	32	0.313929	-0.765224	0.00776301	1.07915	E41L1_HUMAN Band 4.1-like protein 1 OS=Homo sapiens GN=EPB41L1 PE=1 SV=2
Q8IVF7	FMNL3_HUMAN	-0.467382	-1.44498	0.394295	-1.22401	-0.0119104	-0.189218	0.0206816	-0.750428	-0.747692	0.0890256	1.2553	0.673394	0.541101	0.378465	4	3	2	1	0.587457	-0.491182	0.00450453	1.07864	FMNL3_HUMAN Formin-like protein 3 OS=Homo sapiens GN=FMNL3 PE=1 SV=3
O95747	OXSR1_HUMAN	-0.762997	-1.4833	0.043786	-2.09544	-0.0692267	-0.510855	-1.10219	-1.12629	-0.985519	-0.562463	-0.297717	-0.0718708	1.02807	0.788734	14	13	9	12	0.176951	-0.899115	0.0150037	1.07607	OXSR1_HUMAN Serine/threonine-protein kinase OSR1 OS=Homo sapiens GN=OXSR1 PE=1 SV=1
Q9Y247	FA50B_HUMAN	0.553868	-0.269686	0.304213	1.0802	0.555831	0.595116	0.0810808	0.179982	-0.0600279	1.4336	2.06671	-0.100864	1.69859	1.9376	2	1	1	2	1.40713	0.33562	0.00806959	1.07151	FA50B_HUMAN Protein FAM50B OS=Homo sapiens GN=FAM50B PE=1 SV=1
Q7L7V1	DHX32_HUMAN	-0.951251	-0.592005	-0.501038	-0.544811	-0.0220718	0.0278196	-0.115366	0.448604	-0.255524	0.130396	0.0736025	1.41984	1.01876	1.31994	4	7	4	1	0.792506	-0.278405	0.00253396	1.07091	DHX32_HUMAN Putative pre-mRNA-splicing factor ATP-dependent RNA helicase DHX32 OS=Homo sapiens GN=DHX32 PE=1 SV=1
Q9UHD2	TBK1_HUMAN	-0.943382	-0.34423	1.03171	-0.627111	-0.0884956	-0.193409	-0.259619	-0.42033	-0.337958	0.564313	0.778765	1.05701	0.69077	1.05064	12	7	9	11	0.828299	-0.242537	0.00127966	1.07084	TBK1_HUMAN Serine/threonine-protein kinase TBK1 OS=Homo sapiens GN=TBK1 PE=1 SV=1
Q6P1R4	DUS1L_HUMAN	0.17318	-0.871411	1.01305	0.146572	-0.0555793	-0.485121	-0.807742	-0.617904	-0.28524	-0.367008	1.14207	0.694658	1.32104	1.55138	3	1	2	1	0.86843	-0.19891	0.0127337	1.06734	DUS1L_HUMAN tRNA-dihydrouridine(16/17) synthase [NAD(P)(+)]-like OS=Homo sapiens GN=DUS1L PE=1 SV=1
Q16850	CP51A_HUMAN	-0.437912	-1.68807	-0.780954	-2.57924	-0.791068	-1.54669	-1.50993	-1.32709	-1.0525	-0.543487	-0.105776	0.437616	-0.287861	-0.672568	17	8	12	9	-0.234415	-1.30149	0.00610789	1.06708	CP51A_HUMAN Lanosterol 14-alpha demethylase OS=Homo sapiens GN=CYP51A1 PE=1 SV=3
Q9NZN5	ARHGC_HUMAN	-0.648426	-0.281639	0.0722414	-0.952055	-0.556354	-0.436612	-0.203898	-0.485183	-0.119932	0.188326	1.59346	0.718351	0.430942	0.388766	3	1	6	1	0.663968	-0.401318	0.000509161	1.06529	ARHGC_HUMAN Rho guanine nucleotide exchange factor 12 OS=Homo sapiens GN=ARHGEF12 PE=1 SV=1
Q9Y2H1	ST38L_HUMAN	-2.02805	-0.338278	0.505959	0.324432	0.16037	0.219603	-0.31339	-0.223949	0.17231	-0.853326	1.55855	1.40007	1.0547	1.30547	5	5	6	5	0.893093	-0.168999	0.043324	1.06209	ST38L_HUMAN Serine/threonine-protein kinase 38-like OS=Homo sapiens GN=STK38L PE=1 SV=3
Q9NYL2	MLTK_HUMAN	-1.3278	-1.20155	-0.447635	-1.15816	-0.22237	-0.309483	-0.0623813	-0.111694	0.182713	0.714328	1.33891	0.133051	0.0547611	0.48051	5	5	6	7	0.544312	-0.517596	0.00460316	1.06191	MLTK_HUMAN Mitogen-activated protein kinase kinase kinase MLT OS=Homo sapiens GN=ZAK PE=1 SV=3
Q9NPQ8	RIC8A_HUMAN	-0.271871	-0.0621707	-0.495676	-1.44276	0.272215	0.10745	-0.279192	-0.602426	-0.458539	-0.696139	0.366102	1.5031	1.17617	1.15582	7	9	8	6	0.701009	-0.359218	0.0130846	1.06023	RIC8A_HUMAN Synembryn-A OS=Homo sapiens GN=RIC8A PE=1 SV=3
Q71SY5	MED25_HUMAN	-1.17094	-0.814008	-0.0128973	0.268826	0.872294	0.790292	0.0501743	0.428544	-0.329318	1.60367	1.1838	0.735469	0.873941	0.937495	1	1	2	1	1.06688	0.00921864	0.00783531	1.05766	MED25_HUMAN Mediator of RNA polymerase II transcription subunit 25 OS=Homo sapiens GN=MED25 PE=1 SV=2
Q9BTE7	DCNL5_HUMAN	0.20786	-0.452427	0.269393	-1.15038	0.127607	-0.0776836	-0.64218	-0.78962	-0.758672	0.810867	0.349375	0.941725	0.418872	0.951296	6	4	7	7	0.694427	-0.3629	0.00120126	1.05733	DCNL5_HUMAN DCN1-like protein 5 OS=Homo sapiens GN=DCUN1D5 PE=1 SV=1
Q6ZRQ5	MMS22_HUMAN	0.0163421	-0.0532642	0.403271	-0.640816	-0.25218	-0.85667	-0.317645	-0.801367	-0.842829	0.363626	1.93495	0.640965	0.152871	0.332676	3	9	5	5	0.685019	-0.371684	0.00497704	1.0567	MMS22_HUMAN Protein MMS22-like OS=Homo sapiens GN=MMS22L PE=1 SV=3
O14579	COPE_HUMAN	-0.352197	-1.13388	0.595921	-1.60387	-0.0516448	-0.425566	-0.502592	-0.798025	-0.964091	0.558194	0.85528	-0.265374	0.579182	0.627758	13	8	7	7	0.471008	-0.581771	0.00685442	1.05278	COPE_HUMAN Coatomer subunit epsilon OS=Homo sapiens GN=COPE PE=1 SV=3
Q6IA86	ELP2_HUMAN	-0.0479412	-0.869465	-1.08905	-0.897971	-0.742897	-0.718159	-0.337586	-0.688224	-0.621505	0.261156	1.02908	1.15534	-0.190469	-0.35505	7	11	6	3	0.380011	-0.668088	0.00183248	1.0481	ELP2_HUMAN Elongator complex protein 2 OS=Homo sapiens GN=ELP2 PE=1 SV=2
O15530	PDPK1_HUMAN	-1.13832	-0.509137	1.03544	0.745012	-0.147365	-0.319826	-0.629872	-0.276387	-0.451916	0.487614	1.35024	-0.0191095	1.23652	1.22868	5	4	4	2	0.856788	-0.188041	0.0139634	1.04483	PDPK1_HUMAN 3-phosphoinositide-dependent protein kinase 1 OS=Homo sapiens GN=PDPK1 PE=1 SV=1
Q92530	PSMF1_HUMAN	-0.083757	-0.93347	-1.24447	0.363838	-1.14649	-0.84905	-1.47445	-1.29904	-1.65698	1.11837	0.340175	-0.0910224	-0.18749	-0.581176	2	1	1	4	0.119771	-0.924873	0.0146012	1.04464	PSMF1_HUMAN Proteasome inhibitor PI31 subunit OS=Homo sapiens GN=PSMF1 PE=1 SV=2
Q9NXK8	FXL12_HUMAN	-0.190725	-0.442095	-0.439742	0.108536	0.301207	0.595665	-0.0460712	-1.12353	-0.266573	1.62087	0.848938	1.44328	0.310967	0.155018	2	5	2	1	0.875816	-0.167036	0.00552215	1.04285	FXL12_HUMAN F-box/LRR-repeat protein 12 OS=Homo sapiens GN=FBXL12 PE=1 SV=1
P29353	SHC1_HUMAN	-1.59302	-1.50844	-0.899766	0.41845	-0.715473	-0.50268	-0.719297	-0.556968	-0.783906	0.389939	1.00423	-0.502548	0.0388157	0.466633	6	4	7	6	0.279414	-0.762344	0.00723884	1.04176	SHC1_HUMAN SHC-transforming protein 1 OS=Homo sapiens GN=SHC1 PE=1 SV=4
O75122	CLAP2_HUMAN	0.0434079	-0.990831	-0.208457	0.131182	0.676474	0.523451	-0.43402	-1.24576	-0.4428	0.237861	-0.380876	2.37662	0.928726	0.952682	10	6	7	7	0.823003	-0.216372	0.0364956	1.03938	CLAP2_HUMAN CLIP-associating protein 2 OS=Homo sapiens GN=CLASP2 PE=1 SV=2
Q9NUL3	STAU2_HUMAN	-0.305092	0.305662	-0.461862	-1.63714	0.93723	0.963782	0.224142	0.391891	0.46619	2.00304	0.849693	1.13558	0.695081	0.999367	10	5	7	5	1.13655	0.0983116	0.0242998	1.03824	STAU2_HUMAN Double-stranded RNA-binding protein Staufen homolog 2 OS=Homo sapiens GN=STAU2 PE=1 SV=1
Q93062	RBPMS_HUMAN	-1.4731	-0.280306	-1.07512	0.60252	-0.576866	-0.371973	0.0736556	0.00463111	-0.203318	0.291812	1.88724	0.0309371	0.348413	0.797273	3	2	3	1	0.671135	-0.366653	0.0154944	1.03779	RBPMS_HUMAN RNA-binding protein with multiple splicing OS=Homo sapiens GN=RBPMS PE=1 SV=1
P31751	AKT2_HUMAN	-0.960165	-0.147697	-0.138948	-0.350499	-0.0827644	-0.155737	-0.101432	-0.763864	-0.570414	-0.457922	0.75006	0.542667	1.00828	1.5111	7	7	9	12	0.670836	-0.363502	0.0028661	1.03434	AKT2_HUMAN RAC-beta serine/threonine-protein kinase OS=Homo sapiens GN=AKT2 PE=1 SV=2
Q86UU0	BCL9L_HUMAN	-0.516545	1.08696	0.0741569	-1.39054	-1.26616	-0.778259	-0.486152	-0.459174	-0.43329	0.318336	1.39102	1.24197	-0.240795	0.133299	1	1	6	5	0.568766	-0.463223	0.025652	1.03199	BCL9L_HUMAN B-cell CLL/lymphoma 9-like protein OS=Homo sapiens GN=BCL9L PE=1 SV=1
Q9H7D7	WDR26_HUMAN	-1.60024	0.302561	-0.194376	-1.36387	-0.361533	-0.517144	-0.411977	-0.723356	-0.131299	-0.204301	0.610905	1.31404	0.365713	0.291859	3	5	5	5	0.475644	-0.555693	0.00822233	1.03134	WDR26_HUMAN WD repeat-containing protein 26 OS=Homo sapiens GN=WDR26 PE=1 SV=3
Q99460	PSMD1_HUMAN	-0.187741	-2.50637	-2.45472	-1.17009	-0.961097	-1.25076	-0.930181	-1.15423	-1.0825	-0.248285	-0.217196	0.219309	-0.55218	-0.550258	35	29	31	24	-0.269722	-1.29974	0.0125998	1.03002	PSMD1_HUMAN 26S proteasome non-ATPase regulatory subunit 1 OS=Homo sapiens GN=PSMD1 PE=1 SV=2
Q96HA7	TONSL_HUMAN	-0.752975	0.35646	-0.0430697	1.03932	0.614333	0.449278	0.0312525	-0.339277	0.42911	0.959001	1.33519	0.969969	1.58648	1.28222	11	10	6	7	1.22657	0.198271	0.00184886	1.0283	TONSL_HUMAN Tonsoku-like protein OS=Homo sapiens GN=TONSL PE=1 SV=2
O94888	UBXN7_HUMAN	-0.241604	-1.22627	-0.614517	-1.67905	-1.14239	-0.900678	-0.303104	-0.173754	-0.226334	-0.415843	1.89726	1.07414	-0.548835	-0.483515	1	5	8	7	0.304642	-0.723078	0.0363224	1.02772	UBXN7_HUMAN UBX domain-containing protein 7 OS=Homo sapiens GN=UBXN7 PE=1 SV=2
O14964	HGS_HUMAN	-0.135958	-0.534577	-0.0245787	-0.760734	-1.15474	-0.890545	-1.03242	-1.39426	-1.22611	0.79504	0.515633	0.846654	-0.75038	-0.266448	7	3	11	9	0.2281	-0.794881	0.00697822	1.02298	HGS_HUMAN Hepatocyte growth factor-regulated tyrosine kinase substrate OS=Homo sapiens GN=HGS PE=1 SV=1
O76071	CIAO1_HUMAN	-0.634752	0.281204	0.457816	-1.63	-0.2517	-0.508859	0.281149	0.0897944	0.0804294	0.355571	1.46854	0.782807	0.747613	0.737085	4	6	5	3	0.818323	-0.20388	0.00824412	1.0222	CIAO1_HUMAN Probable cytosolic iron-sulfur protein assembly protein CIAO1 OS=Homo sapiens GN=CIAO1 PE=1 SV=1
Q01968	OCRL_HUMAN	-1.16861	-0.633036	0.167293	-0.790097	-0.188572	-0.313058	-0.015027	-0.150997	-0.102488	0.448435	1.19092	0.181036	0.7462	0.759758	11	4	8	7	0.66527	-0.354954	0.000789341	1.02022	OCRL_HUMAN Inositol polyphosphate 5-phosphatase OCRL-1 OS=Homo sapiens GN=OCRL PE=1 SV=3
Q86X10	RLGPB_HUMAN	0.171625	0.942473	-1.76906	0.0187527	-0.243097	-0.523218	-1.21541	-0.328626	-0.0256279	0.17228	1.3107	1.44657	0.313691	0.203774	4	5	4	2	0.689403	-0.330243	0.0296501	1.01965	RLGPB_HUMAN Ral GTPase-activating protein subunit beta OS=Homo sapiens GN=RALGAPB PE=1 SV=1
Q92888	ARHG1_HUMAN	-0.499548	-0.0623225	0.582488	-0.921261	-0.275769	-0.370783	-0.677915	-0.710399	-0.576452	0.137504	0.254993	1.05044	0.811453	0.888786	16	13	16	14	0.628636	-0.390218	0.00117424	1.01885	ARHG1_HUMAN Rho guanine nucleotide exchange factor 1 OS=Homo sapiens GN=ARHGEF1 PE=1 SV=2
Q9C0E2	XPO4_HUMAN	0.47089	-1.24761	-0.0826345	0.193826	-0.629225	-0.485029	-1.83062	-1.13941	-1.83055	-0.13997	1.63644	0.118478	-0.168702	-0.0179257	2	3	5	2	0.285664	-0.731152	0.0451081	1.01682	XPO4_HUMAN Exportin-4 OS=Homo sapiens GN=XPO4 PE=1 SV=2
Q9H6S3	ES8L2_HUMAN	0.107282	-0.326068	-0.765449	0.190657	-0.384318	-0.163584	-0.998325	-1.25013	-1.1774	0.158352	-0.00106069	2.0877	0.0440698	0.125621	12	8	12	8	0.482937	-0.529703	0.0206104	1.01264	ES8L2_HUMAN Epidermal growth factor receptor kinase substrate 8-like protein 2 OS=Homo sapiens GN=EPS8L2 PE=1 SV=2
Q9H3Q1	BORG4_HUMAN	-0.865418	-0.0765121	-0.0150544	-0.865008	-0.730845	-0.801942	0.323069	-0.0552314	0.310819	1.2991	-0.266486	1.06367	0.391239	1.02115	2	1	5	3	0.701735	-0.308458	0.00654334	1.01019	BORG4_HUMAN Cdc42 effector protein 4 OS=Homo sapiens GN=CDC42EP4 PE=1 SV=1
Q9NRH3	TBG2_HUMAN	-0.0143278	-0.532908	-0.659439	-0.336227	-0.0769834	-0.294957	-0.428923	-0.244317	-0.259979	0.382691	0.647713	1.19399	0.236604	0.986874	8	9	8	7	0.689574	-0.316451	3.86124e-05	1.00603	TBG2_HUMAN Tubulin gamma-2 chain OS=Homo sapiens GN=TUBG2 PE=2 SV=1
P14735	IDE_HUMAN	-0.427433	-2.79323	-0.00401732	-1.85802	-1.969	-1.71538	-1.7376	-1.64351	-1.51688	-0.425752	0.187584	-0.400667	-1.24445	-0.681371	12	13	18	16	-0.51293	-1.51834	0.031744	1.00541	IDE_HUMAN Insulin-degrading enzyme OS=Homo sapiens GN=IDE PE=1 SV=4
P60604	UB2G2_HUMAN	-1.03451	-0.988646	-2.02079	-1.17842	-0.349463	-0.969475	-0.400345	-0.411569	-1.09365	-0.380739	0.364757	0.177602	0.272156	-0.125739	4	2	5	2	0.0616074	-0.938541	0.0021803	1.00015	UB2G2_HUMAN Ubiquitin-conjugating enzyme E2 G2 OS=Homo sapiens GN=UBE2G2 PE=1 SV=1
Q96A65	EXOC4_HUMAN	-0.682329	-0.218911	0.151485	-0.222335	-0.098837	-0.447511	-0.887753	-0.452931	-0.501253	0.464857	1.25465	0.2456	0.500326	0.655677	12	5	13	13	0.624222	-0.373375	0.000189371	0.997597	EXOC4_HUMAN Exocyst complex component 4 OS=Homo sapiens GN=EXOC4 PE=1 SV=1
Q12899	TRI26_HUMAN	0.753033	0.223494	1.06477	-1.55834	0.726545	1.14167	0.424717	0.742412	0.678829	0.952614	1.49135	1.64386	1.56233	1.64808	10	5	8	10	1.45965	0.466348	0.0227722	0.9933	TRI26_HUMAN Tripartite motif-containing protein 26 OS=Homo sapiens GN=TRIM26 PE=1 SV=1
Q96C36	P5CR2_HUMAN	-0.303562	-1.55941	-1.16787	-0.232401	-1.62438	-1.45479	-1.91303	-1.65521	-1.73577	-0.192242	0.611577	-0.333837	-0.791155	-0.805184	7	5	4	6	-0.302168	-1.29405	0.0122802	0.991878	P5CR2_HUMAN Pyrroline-5-carboxylate reductase 2 OS=Homo sapiens GN=PYCR2 PE=1 SV=1
Q9UKZ1	CNO11_HUMAN	0.151428	0.306072	-1.75312	-0.151541	-1.10409	-0.739748	-0.22131	-0.465349	-0.230799	1.21059	1.25452	0.433018	-0.0306854	-0.258869	3	4	4	2	0.521714	-0.467606	0.020111	0.98932	CNO11_HUMAN CCR4-NOT transcription complex subunit 11 OS=Homo sapiens GN=CNOT11 PE=1 SV=1
P13693	TCTP_HUMAN	0.893566	-1.33051	-1.17465	-1.44184	-1.33414	-1.40228	-1.61268	-1.34366	-1.77784	-0.742531	0.0077509	0.867471	-0.585905	-0.45504	10	8	10	7	-0.181651	-1.16934	0.0356844	0.987685	TCTP_HUMAN Translationally-controlled tumor protein OS=Homo sapiens GN=TPT1 PE=1 SV=1
P36543	VATE1_HUMAN	-0.182368	-0.827942	0.177613	-1.73132	-0.0905265	0.295192	-0.980531	-0.934042	-0.893523	1.22755	0.727175	-0.227376	0.0922915	0.240549	9	5	3	6	0.412038	-0.574161	0.0162915	0.986199	VATE1_HUMAN V-type proton ATPase subunit E 1 OS=Homo sapiens GN=ATP6V1E1 PE=1 SV=1
Q9H3P2	NELFA_HUMAN	-0.141542	-0.929431	0.403708	-0.461734	-0.41553	-0.193264	-0.229559	-0.811916	-0.382528	1.30648	1.25288	0.148643	0.172035	0.281348	9	6	8	9	0.632276	-0.351311	0.00267396	0.983587	NELFA_HUMAN Negative elongation factor A OS=Homo sapiens GN=NELFA PE=1 SV=3
Q03169	TNAP2_HUMAN	-0.641589	-0.230334	-0.645118	-1.30059	0.570131	0.449238	-0.180809	-0.380862	0.0162133	0.136124	-0.206946	0.658562	1.20005	1.82005	8	8	9	14	0.721566	-0.260414	0.0213262	0.98198	TNAP2_HUMAN Tumor necrosis factor alpha-induced protein 2 OS=Homo sapiens GN=TNFAIP2 PE=2 SV=2
Q96RR4	KKCC2_HUMAN	-1.20294	-0.430542	0.294096	0.0390201	-0.144862	-0.200776	-0.233422	0.0322808	0.0440629	1.15651	2.26296	0.822384	-0.385222	0.0420993	2	5	2	1	0.779745	-0.200342	0.0257285	0.980087	KKCC2_HUMAN Calcium/calmodulin-dependent protein kinase kinase 2 OS=Homo sapiens GN=CAMKK2 PE=1 SV=2
O00303	EIF3F_HUMAN	-0.796607	-1.48723	-0.276244	-0.934027	-0.87733	-0.669939	0.219361	-0.122947	0.219379	0.0784742	1.16426	1.84819	-0.304557	-0.512652	15	5	7	9	0.454743	-0.525064	0.0371539	0.979807	EIF3F_HUMAN Eukaryotic translation initiation factor 3 subunit F OS=Homo sapiens GN=EIF3F PE=1 SV=1
Q8N201	INT1_HUMAN	-0.556092	0.412916	-0.0222084	-0.980592	0.938293	1.38379	0.689597	0.586361	0.82669	1.66464	1.767	0.318493	1.60329	1.36559	20	14	16	12	1.3438	0.364306	0.0281917	0.979497	INT1_HUMAN Integrator complex subunit 1 OS=Homo sapiens GN=INTS1 PE=1 SV=2
P25205	MCM3_HUMAN	-0.358424	-1.03087	-1.17312	-0.645151	0.492646	0.452529	0.32794	0.239261	0.360295	0.242121	1.09728	0.433336	1.04655	1.3331	42	26	36	41	0.830477	-0.148323	0.0133927	0.978799	MCM3_HUMAN DNA replication licensing factor MCM3 OS=Homo sapiens GN=MCM3 PE=1 SV=3
Q96JC1	VPS39_HUMAN	-0.770191	0.511263	-0.809363	0.857375	0.115943	0.325919	-0.978927	-0.600339	-0.424039	1.14872	1.24146	0.652264	0.136552	0.72475	9	9	5	5	0.780748	-0.196929	0.0126167	0.977677	VPS39_HUMAN Vam6/Vps39-like protein OS=Homo sapiens GN=VPS39 PE=1 SV=2
Q13131	AAPK1_HUMAN	-0.254161	-0.271375	-0.164884	0.538907	0.243441	0.069369	-0.122046	-0.0788858	-0.0927965	1.07796	1.06226	0.717173	1.11321	0.840952	14	6	11	9	0.962312	-0.0147148	8.04829e-06	0.977027	AAPK1_HUMAN 5'-AMP-activated protein kinase catalytic subunit alpha-1 OS=Homo sapiens GN=PRKAA1 PE=1 SV=4
O15511	ARPC5_HUMAN	-0.0626766	-0.794241	-0.366681	-0.84868	-0.500064	-0.514555	-0.302272	-0.694465	-0.752617	-0.260892	1.91169	0.817396	-0.242186	-0.0335572	10	4	3	9	0.438489	-0.537361	0.0107178	0.97585	ARPC5_HUMAN Actin-related protein 2/3 complex subunit 5 OS=Homo sapiens GN=ARPC5 PE=1 SV=3
Q9NSP4	CENPM_HUMAN	0.122599	-0.0972617	0.105371	-0.119767	0.772184	0.987689	0.688904	0.709253	0.662348	1.94111	1.4181	0.274346	1.72147	1.64617	2	2	3	4	1.40024	0.425702	0.00507509	0.974537	CENPM_HUMAN Centromere protein M OS=Homo sapiens GN=CENPM PE=1 SV=1
Q5T9S5	CCD18_HUMAN	-0.628955	0.38852	0.522683	-1.70484	0.48873	0.415642	-0.18706	0.319916	0.0548381	0.296328	1.72697	0.53351	1.09527	1.02753	1	3	4	1	0.935921	-0.0367248	0.0242506	0.972646	CCD18_HUMAN Coiled-coil domain-containing protein 18 OS=Homo sapiens GN=CCDC18 PE=1 SV=1
Q9BY32	ITPA_HUMAN	-0.183332	-1.64911	-1.18597	0.217083	-1.218	-1.56147	-0.995819	-1.33352	-1.13365	-0.640094	1.09278	0.0397019	-0.284715	-0.371504	5	9	5	3	-0.0327653	-1.00487	0.0184975	0.972101	ITPA_HUMAN Inosine triphosphate pyrophosphatase OS=Homo sapiens GN=ITPA PE=1 SV=2
P62330	ARF6_HUMAN	-1.52405	-0.926921	0.172036	-1.38155	-0.348026	-1.42765	-1.5827	-1.22213	-1.41585	0.00843912	-0.0112645	0.508347	-0.236021	-0.774308	3	6	6	5	-0.100962	-1.07298	0.00913237	0.972022	ARF6_HUMAN ADP-ribosylation factor 6 OS=Homo sapiens GN=ARF6 PE=1 SV=2
Q92540	SMG7_HUMAN	-0.656391	0.297193	0.312501	-0.271118	0.677492	0.785285	-0.520383	-0.308031	-0.357161	0.552499	1.0652	0.829306	1.14899	1.23658	1	6	3	1	0.966515	-0.00451262	0.00269484	0.971027	SMG7_HUMAN Protein SMG7 OS=Homo sapiens GN=SMG7 PE=1 SV=2
O60229	KALRN_HUMAN	-1.37021	0.0525164	1.28691	-0.527441	0.387252	0.408692	0.0146526	-0.00471304	0.022323	1.37461	0.847049	0.721543	0.944112	1.10833	5	5	3	5	0.999128	0.0299982	0.0139382	0.96913	KALRN_HUMAN Kalirin OS=Homo sapiens GN=KALRN PE=1 SV=2
Q15003	CND2_HUMAN	-0.504053	-0.712381	0.563614	-0.56252	-0.195607	-0.325027	-0.383839	-0.621531	-0.449525	-0.826518	0.291325	1.1252	1.03012	1.44856	16	13	18	14	0.613739	-0.354541	0.0146395	0.96828	CND2_HUMAN Condensin complex subunit 2 OS=Homo sapiens GN=NCAPH PE=1 SV=3
O95067	CCNB2_HUMAN	-0.931286	0.349281	0.156464	0.25067	0.266835	0.43415	-0.49741	-0.121165	-0.98249	0.961523	0.463986	0.148236	1.17435	1.4945	3	2	9	4	0.848519	-0.119439	0.00815863	0.967958	CCNB2_HUMAN G2/mitotic-specific cyclin-B2 OS=Homo sapiens GN=CCNB2 PE=1 SV=1
Q9UI12	VATH_HUMAN	-0.82383	-1.60413	-0.0855594	-1.94079	-0.813627	-0.416404	-1.24747	-1.08562	-1.11182	0.902516	0.540011	-0.610258	-0.673396	-0.395489	6	5	6	4	-0.0473233	-1.01436	0.0164835	0.967039	VATH_HUMAN V-type proton ATPase subunit H OS=Homo sapiens GN=ATP6V1H PE=1 SV=1
Q9HAD4	WDR41_HUMAN	0.267459	-0.939109	0.141259	1.78411	0.254964	-0.11201	-0.872429	-1.14496	-0.600273	0.583038	1.54323	0.975069	0.496166	0.556139	4	3	3	6	0.830729	-0.135666	0.0460425	0.966395	WDR41_HUMAN WD repeat-containing protein 41 OS=Homo sapiens GN=WDR41 PE=2 SV=3
P49959	MRE11_HUMAN	-2.18989	-0.306344	0.585029	-0.445692	0.571485	0.325515	0.313333	-0.0297141	0.290486	0.232422	0.91895	0.269732	1.49586	1.41625	21	19	19	22	0.866643	-0.0984217	0.0480888	0.965065	MRE11_HUMAN Double-strand break repair protein MRE11A OS=Homo sapiens GN=MRE11A PE=1 SV=3
Q92625	ANS1A_HUMAN	0.666685	0.54563	0.946863	-0.824006	-0.231928	-0.880182	-0.403217	-0.382616	-0.820203	0.340189	0.572787	2.04446	0.412745	0.676488	2	5	3	2	0.809333	-0.153664	0.0298231	0.962997	ANS1A_HUMAN Ankyrin repeat and SAM domain-containing protein 1A OS=Homo sapiens GN=ANKS1A PE=1 SV=4
Q14185	DOCK1_HUMAN	0.836323	-1.6503	-0.141458	0.312192	-0.485622	-1.01681	-0.578929	-0.717823	-0.732522	0.629898	0.0267126	0.974763	0.281549	0.578306	3	5	1	4	0.498246	-0.463884	0.0181682	0.96213	DOCK1_HUMAN Dedicator of cytokinesis protein 1 OS=Homo sapiens GN=DOCK1 PE=1 SV=2
A6NKD9	CC85C_HUMAN	-0.589567	-0.493891	0.366887	0.0561664	-0.484553	-0.995839	-0.416675	-0.47229	-0.739067	0.0391665	0.997136	0.495012	0.759285	0.414196	3	1	1	2	0.540959	-0.418759	0.000885781	0.959718	CC85C_HUMAN Coiled-coil domain-containing protein 85C OS=Homo sapiens GN=CCDC85C PE=1 SV=1
Q8NEZ2	VP37A_HUMAN	-1.11913	-0.433212	-0.452236	0.821463	-1.24938	-0.785037	-1.21639	-1.31076	-1.06094	0.124249	1.61318	0.109783	-0.367143	-0.462572	3	1	2	3	0.2035	-0.75618	0.0368675	0.95968	VP37A_HUMAN Vacuolar protein sorting-associated protein 37A OS=Homo sapiens GN=VPS37A PE=1 SV=1
P10398	ARAF_HUMAN	-0.523699	0.0380939	0.570794	-0.263839	0.0421316	-0.323489	-0.239363	-0.351319	0.00271215	-0.0569904	0.983955	0.593147	1.26287	1.43085	10	6	7	15	0.842767	-0.116442	0.00185561	0.959209	ARAF_HUMAN Serine/threonine-protein kinase A-Raf OS=Homo sapiens GN=ARAF PE=1 SV=2
Q8TD19	NEK9_HUMAN	-1.08048	0.162146	-0.989965	-1.96378	-0.304916	-0.545561	-0.768083	-1.07455	-0.755664	-0.903647	0.20765	0.700064	0.236166	0.485085	3	5	5	5	0.145064	-0.813428	0.0142211	0.958492	NEK9_HUMAN Serine/threonine-protein kinase Nek9 OS=Homo sapiens GN=NEK9 PE=1 SV=2
Q92797	SYMPK_HUMAN	-1.43641	-0.636615	-0.172654	-1.61672	0.477248	0.426717	0.359023	0.345855	0.422746	0.976701	1.53901	-0.188782	0.763728	0.681396	20	24	21	17	0.75441	-0.203423	0.0458788	0.957833	SYMPK_HUMAN Symplekin OS=Homo sapiens GN=SYMPK PE=1 SV=2
O75592	MYCB2_HUMAN	-0.654729	0.0492091	-0.448239	-0.802152	1.23354	0.816789	0.232185	0.531229	0.788538	-0.0531813	0.533886	1.57201	1.7509	1.95176	32	25	18	11	1.15108	0.194041	0.045461	0.957035	MYCB2_HUMAN E3 ubiquitin-protein ligase MYCBP2 OS=Homo sapiens GN=MYCBP2 PE=1 SV=3
Q7L590	MCM10_HUMAN	-0.254922	1.31341	0.564601	-0.93501	0.430898	0.460149	0.215206	-0.0818651	0.37371	1.54439	1.54645	0.743481	1.10564	0.997151	11	4	3	1	1.18742	0.231798	0.00862464	0.955627	MCM10_HUMAN Protein MCM10 homolog OS=Homo sapiens GN=MCM10 PE=1 SV=2
P49005	DPOD2_HUMAN	0.0902558	0.302649	-1.96538	-0.777354	0.046872	-0.285901	-0.139464	-0.0442022	0.113002	-0.245765	0.997858	1.09335	0.743345	0.690443	7	5	7	7	0.655846	-0.295503	0.0217868	0.951349	DPOD2_HUMAN DNA polymerase delta subunit 2 OS=Homo sapiens GN=POLD2 PE=1 SV=1
Q6NUM9	RETST_HUMAN	-0.585233	-1.02315	-0.89703	-0.630483	-0.469828	-0.418683	-0.394933	-0.623065	-0.34192	-0.361108	0.162219	1.75747	0.175297	0.0241587	6	5	8	8	0.351606	-0.598258	0.00569386	0.949864	RETST_HUMAN All-trans-retinol 13,14-reductase OS=Homo sapiens GN=RETSAT PE=1 SV=2
P60510	PP4C_HUMAN	0.0237116	-0.846237	0.821669	-0.00802582	-0.588718	-0.382874	-0.826239	-0.641589	-0.38702	1.25982	0.917378	1.11505	-0.165885	0.0266301	1	5	4	3	0.6306	-0.315036	0.0120147	0.945635	PP4C_HUMAN Serine/threonine-protein phosphatase 4 catalytic subunit OS=Homo sapiens GN=PPP4C PE=1 SV=1
Q8TAG9	EXOC6_HUMAN	0.268781	-0.819446	-1.32627	-0.0233673	-0.816799	-1.24794	-0.366666	-1.17327	-0.709129	-0.691637	0.924323	0.965071	0.0367037	0.0382539	4	5	4	3	0.254543	-0.690456	0.0160492	0.944999	EXOC6_HUMAN Exocyst complex component 6 OS=Homo sapiens GN=EXOC6 PE=1 SV=3
P38398	BRCA1_HUMAN	-1.37851	0.567659	0.35216	-0.441514	0.490267	0.457559	0.659789	0.404741	0.620351	0.626177	1.36716	1.44905	1.09748	1.14345	3	10	3	3	1.13666	0.1925	0.0130299	0.944162	BRCA1_HUMAN Breast cancer type 1 susceptibility protein OS=Homo sapiens GN=BRCA1 PE=1 SV=2
Q9NSI2	F207A_HUMAN	0.443741	0.571179	-0.525146	-0.486433	0.384542	1.1539	0.365117	0.559988	-0.1046	1.38354	1.0941	1.18157	1.1917	1.17759	11	5	6	7	1.2057	0.262476	0.00261113	0.943224	F207A_HUMAN Protein FAM207A OS=Homo sapiens GN=FAM207A PE=1 SV=2
Q96ST3	SIN3A_HUMAN	-0.155375	0.187067	-0.56098	-1.09724	0.486669	0.460341	0.456763	0.298949	0.768522	1.16266	1.49603	0.719582	0.793885	1.01097	23	20	16	20	1.03662	0.0938573	0.00681006	0.942768	SIN3A_HUMAN Paired amphipathic helix protein Sin3a OS=Homo sapiens GN=SIN3A PE=1 SV=2
Q9BPX5	ARP5L_HUMAN	0.133906	-0.421209	-0.0115997	-2.29514	-0.0694879	0.364155	-0.515445	0.00874504	-0.493222	0.623467	0.488947	0.980831	0.511608	0.268653	6	4	1	2	0.574701	-0.366589	0.0245256	0.94129	ARP5L_HUMAN Actin-related protein 2/3 complex subunit 5-like protein OS=Homo sapiens GN=ARPC5L PE=1 SV=1
O94822	LTN1_HUMAN	-0.497548	-0.932585	0.309824	-1.72371	-0.0751191	-0.00699975	-0.584629	-0.480185	-0.168584	1.20393	-0.0770434	0.382711	0.209646	0.673366	10	12	11	4	0.478522	-0.462171	0.0113151	0.940693	LTN1_HUMAN E3 ubiquitin-protein ligase listerin OS=Homo sapiens GN=LTN1 PE=1 SV=6
P31689	DNJA1_HUMAN	-1.10101	0.0977391	-0.769322	-1.01526	0.329013	0.087128	-0.0833709	-0.0111052	-0.00193136	-0.505928	1.16455	0.484651	1.11466	1.07063	31	25	23	24	0.665714	-0.274236	0.0156975	0.93995	DNJA1_HUMAN DnaJ homolog subfamily A member 1 OS=Homo sapiens GN=DNAJA1 PE=1 SV=2
Q8NDI1	EHBP1_HUMAN	0.339297	-0.0173588	0.357119	0.376475	-0.897915	-0.865911	-1.4067	-1.29763	-1.43555	0.629946	0.228649	1.03618	-0.185964	0.294301	5	10	6	3	0.400623	-0.538686	0.0333422	0.939309	EHBP1_HUMAN EH domain-binding protein 1 OS=Homo sapiens GN=EHBP1 PE=1 SV=3
Q96CW5	GCP3_HUMAN	-0.91902	-0.598672	-0.688152	-0.813231	-0.872021	-0.770921	-0.941967	-0.77407	-0.647861	-0.0810081	0.593836	0.859678	-0.297261	-0.29679	7	6	7	5	0.155691	-0.780657	0.000234983	0.936348	GCP3_HUMAN Gamma-tubulin complex component 3 OS=Homo sapiens GN=TUBGCP3 PE=1 SV=2
Q9H9E3	COG4_HUMAN	-0.155759	0.406191	0.285742	-0.304925	0.0324051	-0.130192	0.159634	-0.382598	-0.741066	0.713934	0.787475	1.16313	0.789342	0.76045	6	5	5	3	0.842865	-0.0922852	0.000160952	0.935151	COG4_HUMAN Conserved oligomeric Golgi complex subunit 4 OS=Homo sapiens GN=COG4 PE=1 SV=3
P53621	COPA_HUMAN	-0.0239701	-1.76187	-0.599352	-1.55604	-0.543467	-0.964948	-1.00077	-1.05491	-0.95239	-0.672732	0.389785	0.591698	-0.200975	-0.131749	44	33	32	39	-0.00479466	-0.939747	0.00699045	0.934952	COPA_HUMAN Coatomer subunit alpha OS=Homo sapiens GN=COPA PE=1 SV=2
Q14677	EPN4_HUMAN	-0.718466	0.125591	-0.0672816	0.340821	-0.73111	-0.0978971	-0.405441	-0.223782	-0.298993	1.41523	1.22316	1.20294	-0.407802	0.0864043	16	5	18	14	0.703987	-0.230729	0.0104082	0.934716	EPN4_HUMAN Clathrin interactor 1 OS=Homo sapiens GN=CLINT1 PE=1 SV=1
O75935	DCTN3_HUMAN	-0.311754	-0.933634	-0.575285	-0.0473491	-0.502902	-0.426626	0.0413468	-0.0523125	0.52553	0.441687	0.577725	1.04886	0.355488	0.98049	3	2	2	1	0.680851	-0.253665	0.00106578	0.934516	DCTN3_HUMAN Dynactin subunit 3 OS=Homo sapiens GN=DCTN3 PE=1 SV=1
Q9BWU0	NADAP_HUMAN	0.507444	0.00177855	-1.81975	-0.608496	-0.840026	-1.08453	-0.960292	-0.818948	-1.12622	-0.172464	1.33748	0.613198	-0.42561	-0.432472	11	10	10	13	0.184027	-0.749894	0.0357236	0.933921	NADAP_HUMAN Kanadaptin OS=Homo sapiens GN=SLC4A1AP PE=1 SV=1
Q70J99	UN13D_HUMAN	-1.24791	-0.67805	-0.420572	0.154484	-0.333812	-0.16776	-0.273743	-0.807433	0.483389	0.759598	0.130096	0.458101	0.55609	0.933323	13	9	6	6	0.567442	-0.365712	0.00318399	0.933154	UN13D_HUMAN Protein unc-13 homolog D OS=Homo sapiens GN=UNC13D PE=1 SV=1
D4Q8H0	D4Q8H0_HUMAN	-0.945874	-0.378401	0.563119	-0.828644	0.218862	0.0197489	-0.130762	-0.469372	-0.146066	0.567765	0.704793	1.1764	0.757511	0.287389	1	1	1	2	0.698772	-0.233043	0.00237653	0.931815	D4Q8H0_HUMAN Mitogen-activated protein kinase kinase kinase MLT OS=Homo sapiens GN=pk PE=1 SV=1
Q8IUR7	ARMC8_HUMAN	-1.35869	-0.44151	-0.0321741	-0.585033	-0.301784	-0.279247	-0.746427	-0.606356	-0.227023	0.0233603	0.827353	0.716465	0.245337	0.292726	5	2	4	3	0.421048	-0.508693	0.000747754	0.929742	ARMC8_HUMAN Armadillo repeat-containing protein 8 OS=Homo sapiens GN=ARMC8 PE=1 SV=2
Q9UNM6	PSD13_HUMAN	0.0652925	-2.21434	0.324786	-1.20974	-0.404037	-0.765904	-1.55527	-1.60694	-1.89517	-0.365638	0.163128	-0.691422	0.172075	0.21897	18	9	15	18	-0.100578	-1.02904	0.0493076	0.928458	PSD13_HUMAN 26S proteasome non-ATPase regulatory subunit 13 OS=Homo sapiens GN=PSMD13 PE=1 SV=2
Q5EBL8	PDZ11_HUMAN	-0.993489	0.836333	-0.597661	-0.0548952	0.525657	0.571481	-0.193101	0.251809	0.0144336	0.712114	1.17166	0.967148	1.05445	0.931487	4	3	1	2	0.967372	0.0400631	0.00517008	0.927309	PDZ11_HUMAN PDZ domain-containing protein 11 OS=Homo sapiens GN=PDZD11 PE=1 SV=2
Q9NY27	PP4R2_HUMAN	-0.86765	-1.37657	-0.125824	-0.872897	-1.46108	-1.42629	-1.32311	-1.124	-1.07615	0.327753	0.724508	0.0555175	-1.2045	-0.640341	3	3	8	3	-0.147412	-1.07262	0.0121941	0.925208	PP4R2_HUMAN Serine/threonine-protein phosphatase 4 regulatory subunit 2 OS=Homo sapiens GN=PPP4R2 PE=1 SV=3
Q8NEB9	PK3C3_HUMAN	-0.534537	-1.00336	0.876548	-0.58363	-0.0567562	-0.136623	-1.2244	-0.938381	-0.642807	1.15659	0.452668	-0.0951531	0.258301	0.495149	7	11	8	4	0.453511	-0.471549	0.0144949	0.92506	PK3C3_HUMAN Phosphatidylinositol 3-kinase catalytic subunit type 3 OS=Homo sapiens GN=PIK3C3 PE=1 SV=1
Q9Y3F4	STRAP_HUMAN	-0.874043	-1.22718	-0.147037	-0.841527	-0.0910677	0.220366	0.171811	0.183034	0.207558	0.318103	0.750507	1.06973	0.163647	0.986709	21	16	15	16	0.657739	-0.266454	0.00730118	0.924193	STRAP_HUMAN Serine-threonine kinase receptor-associated protein OS=Homo sapiens GN=STRAP PE=1 SV=1
Q9BVA0	KTNB1_HUMAN	-0.4079	0.052659	0.0283802	0.0992731	0.380717	0.732267	-0.0867345	-0.0974556	0.249264	1.12082	0.893238	1.29015	0.716213	1.12858	6	6	7	4	1.0298	0.105608	0.000112257	0.924191	KTNB1_HUMAN Katanin p80 WD40 repeat-containing subunit B1 OS=Homo sapiens GN=KATNB1 PE=1 SV=1
Q86XA9	HTR5A_HUMAN	0.182666	-0.263782	0.202272	-2.17021	0.192667	0.203469	0.266446	0.601643	0.327561	0.67675	1.50275	1.07136	0.458292	0.655573	3	7	8	1	0.872945	-0.050808	0.0391394	0.923753	HTR5A_HUMAN HEAT repeat-containing protein 5A OS=Homo sapiens GN=HEATR5A PE=1 SV=2
Q969T4	UB2E3_HUMAN	-0.625614	-1.88674	0.776573	-1.78652	-0.359005	-0.464916	-0.556644	-0.259956	-0.0460563	0.543417	0.60979	0.20428	-0.202738	0.564101	2	2	2	4	0.34377	-0.578764	0.0365656	0.922534	UB2E3_HUMAN Ubiquitin-conjugating enzyme E2 E3 OS=Homo sapiens GN=UBE2E3 PE=1 SV=1
Q8WXW3	PIBF1_HUMAN	-0.643146	0.780808	-0.726116	0.483645	0.593398	0.601529	-0.0248422	0.346102	0.0153357	1.49656	0.850116	0.421791	1.18964	1.437	9	5	2	1	1.07902	0.158524	0.0076349	0.920499	PIBF1_HUMAN Progesterone-induced-blocking factor 1 OS=Homo sapiens GN=PIBF1 PE=1 SV=2
P57772	SELB_HUMAN	-0.665975	-0.292951	-0.0685069	-1.44886	0.605512	-0.25372	-0.0770712	0.0708161	0.104933	0.220589	1.06756	0.316845	1.03297	0.832732	15	7	7	8	0.694139	-0.225092	0.00826786	0.919231	SELB_HUMAN Selenocysteine-specific elongation factor OS=Homo sapiens GN=EEFSEC PE=1 SV=4
Q5VZ89	DEN4C_HUMAN	0.818769	-0.247878	-1.1479	0.50411	-0.519575	-0.339725	-0.572392	-0.872682	-0.229452	0.436675	0.481361	1.24664	0.531231	0.437345	5	6	2	4	0.626651	-0.289637	0.0107615	0.916288	DEN4C_HUMAN DENN domain-containing protein 4C OS=Homo sapiens GN=DENND4C PE=1 SV=2
A1X283	SPD2B_HUMAN	-0.670036	-0.326686	0.258541	-0.564026	-1.34681	-1.19615	-1.43527	-1.32786	-1.19011	-1.35508	0.814069	0.953654	-0.27379	0.109055	6	6	9	9	0.049581	-0.866489	0.0406331	0.91607	SPD2B_HUMAN SH3 and PX domain-containing protein 2B OS=Homo sapiens GN=SH3PXD2B PE=1 SV=3
Q9H3R5	CENPH_HUMAN	-0.700471	0.646773	0.5229	-0.614388	1.12889	1.39807	1.07738	0.641009	1.10969	1.35574	2.21309	0.797599	1.59842	1.49085	10	3	6	5	1.49114	0.578872	0.033982	0.912268	CENPH_HUMAN Centromere protein H OS=Homo sapiens GN=CENPH PE=1 SV=1
P19623	SPEE_HUMAN	-1.4973	-1.65732	-1.19691	-1.83641	-1.01572	-1.08426	-1.44581	-1.52903	-1.4699	-0.898771	0.200887	-0.771946	-0.391543	-0.659415	12	18	11	12	-0.504158	-1.41474	0.000372453	0.910582	SPEE_HUMAN Spermidine synthase OS=Homo sapiens GN=SRM PE=1 SV=1
P57081	WDR4_HUMAN	-0.315656	-0.523421	-0.335539	-1.0649	-1.13992	-1.44727	-1.10021	-0.782705	-0.963799	1.40799	1.24492	-0.83648	-0.634875	-0.893476	3	3	6	5	0.057617	-0.852601	0.0486846	0.910219	WDR4_HUMAN tRNA (guanine-N(7)-)-methyltransferase non-catalytic subunit WDR4 OS=Homo sapiens GN=WDR4 PE=1 SV=2
Q15477	SKIV2_HUMAN	-0.0879599	-0.253962	-0.645118	-0.467827	0.0490669	-0.580456	-0.770153	-0.654001	-0.250289	-0.727873	0.429822	1.71863	0.439407	0.655945	19	18	18	20	0.503186	-0.406745	0.0121168	0.90993	SKIV2_HUMAN Helicase SKI2W OS=Homo sapiens GN=SKIV2L PE=1 SV=3
Q9Y6E0	STK24_HUMAN	-0.566626	-1.78994	-0.759451	-1.59241	-0.591095	-0.476676	-0.94534	-1.00061	-1.32367	-0.937459	-0.318047	1.20363	-0.348977	-0.0812509	5	7	6	5	-0.0964206	-1.00509	0.0183382	0.90867	STK24_HUMAN Serine/threonine-protein kinase 24 OS=Homo sapiens GN=STK24 PE=1 SV=1
Q9NVU0	RPC5_HUMAN	0.443721	-0.253297	-0.46765	-0.754069	0.503545	0.166222	-0.0927766	-0.0786848	-0.256832	-0.000859544	0.637889	1.07799	1.26392	1.11331	3	4	7	3	0.818448	-0.0877579	0.00342102	0.906206	RPC5_HUMAN DNA-directed RNA polymerase III subunit RPC5 OS=Homo sapiens GN=POLR3E PE=1 SV=1
Q96PU8	QKI_HUMAN	-0.0147258	0.793825	-0.22742	-0.889014	0.81583	0.779483	0.356326	0.0534226	-0.0065834	0.460106	0.986303	1.0525	1.41287	1.53538	10	7	6	6	1.08943	0.184571	0.00914272	0.904861	QKI_HUMAN Protein quaking OS=Homo sapiens GN=QKI PE=1 SV=1
Q9UPU7	TBD2B_HUMAN	0.361331	-0.0971408	0.905795	-0.815416	-0.00114428	-0.0695592	1.15524	0.0187253	0.342432	0.73747	0.707463	1.3421	1.41381	1.30092	1	3	2	1	1.10035	0.20003	0.00880248	0.900321	TBD2B_HUMAN TBC1 domain family member 2B OS=Homo sapiens GN=TBC1D2B PE=1 SV=2
Q99933	BAG1_HUMAN	0.0353371	-0.578873	-1.47689	-0.17769	-0.295585	-0.737741	-0.0230671	0.100387	0.304698	0.721978	0.942703	1.27821	-0.0169748	-0.0167829	6	5	5	6	0.581826	-0.316603	0.013636	0.898429	BAG1_HUMAN BAG family molecular chaperone regulator 1 OS=Homo sapiens GN=BAG1 PE=1 SV=4
P53365	ARFP2_HUMAN	-0.382816	-0.815133	0.389309	-1.41315	-0.91631	-0.508444	-0.521663	-0.87608	-0.547891	-0.00420607	1.01737	1.40645	-0.505402	-0.540079	5	4	3	2	0.274827	-0.621353	0.0298593	0.89618	ARFP2_HUMAN Arfaptin-2 OS=Homo sapiens GN=ARFIP2 PE=1 SV=1
Q15345	LRC41_HUMAN	-0.332037	0.448905	-0.515687	-0.229389	0.166272	-0.266141	-0.421811	-0.603456	-0.0606573	-0.407296	1.72708	1.14241	0.928801	0.0604247	2	3	2	1	0.690284	-0.201556	0.0153425	0.89184	LRC41_HUMAN Leucine-rich repeat-containing protein 41 OS=Homo sapiens GN=LRRC41 PE=1 SV=3
Q9P2B4	CT2NL_HUMAN	0.198727	-0.760693	-0.539778	-0.700816	-0.782679	-0.620509	-0.894935	-0.592546	-0.770159	-0.213894	1.09361	0.512497	-0.0285327	0.0566784	9	5	8	9	0.284072	-0.607043	0.00182037	0.891115	CT2NL_HUMAN CTTNBP2 N-terminal-like protein OS=Homo sapiens GN=CTTNBP2NL PE=1 SV=2
O95248	MTMR5_HUMAN	-1.38724	-1.4999	-0.555181	0.353405	0.00955145	-0.0933937	-1.17894	-0.710215	-0.974171	-0.0562668	0.817861	0.174913	-0.180894	0.336955	6	7	7	4	0.218513	-0.670676	0.0174765	0.889189	MTMR5_HUMAN Myotubularin-related protein 5 OS=Homo sapiens GN=SBF1 PE=1 SV=3
Q9UJK0	TSR3_HUMAN	-0.349372	0.247524	0.705331	0.396076	0.599698	0.519279	0.177721	-0.593644	-0.993468	1.50603	1.62888	-0.440125	1.26734	0.877673	2	4	4	1	0.96796	0.078794	0.0376657	0.889166	TSR3_HUMAN Ribosome biogenesis protein TSR3 homolog OS=Homo sapiens GN=TSR3 PE=1 SV=1
Q7L5Y9	MAEA_HUMAN	-0.599434	-0.163886	0.238624	-1.6647	-0.534533	-0.667552	0.29473	0.325247	0.384506	1.13783	1.11575	-0.0348541	0.600618	0.291238	3	3	3	6	0.622116	-0.265222	0.025899	0.887338	MAEA_HUMAN Macrophage erythroblast attacher OS=Homo sapiens GN=MAEA PE=1 SV=1
Q6BDS2	URFB1_HUMAN	-1.43168	-0.100321	-0.50454	-0.683871	-0.116476	-0.750646	-0.437101	0.157653	-0.482149	0.244239	1.88136	-0.196121	0.0556291	0.0241305	2	4	4	1	0.401848	-0.483237	0.0241016	0.885085	URFB1_HUMAN UHRF1-binding protein 1 OS=Homo sapiens GN=UHRF1BP1 PE=1 SV=1
O60645	EXOC3_HUMAN	0.206578	-0.313766	0.382426	-0.527884	0.0114067	-0.0620618	-0.0718898	-0.451326	-0.414168	1.12758	0.494374	1.38116	0.278897	0.450953	4	6	7	9	0.746592	-0.137854	0.00119599	0.884446	EXOC3_HUMAN Exocyst complex component 3 OS=Homo sapiens GN=EXOC3 PE=1 SV=2
Q9NVE7	PANK4_HUMAN	-0.773392	0.100243	-0.258245	-1.8502	0.43474	0.0978975	-0.911858	-0.786341	-0.421067	-0.0959759	0.249033	0.12977	0.79436	0.903069	7	7	7	3	0.396051	-0.485358	0.0247652	0.881409	PANK4_HUMAN Pantothenate kinase 4 OS=Homo sapiens GN=PANK4 PE=1 SV=1
Q5PRF9	SMAG2_HUMAN	-0.671491	-0.0460383	-1.23466	-0.324301	0.301165	-0.00259584	-0.0477012	0.272666	0.124463	0.00496882	0.954925	1.08991	0.902157	0.55004	6	10	7	5	0.700401	-0.180943	0.00622106	0.881344	SMAG2_HUMAN Protein Smaug homolog 2 OS=Homo sapiens GN=SAMD4B PE=1 SV=1
O14976	GAK_HUMAN	-0.732255	-0.473626	-0.39232	-0.00245093	0.150713	0.0471101	0.144091	0.336175	0.37788	1.02837	1.38925	0.822616	0.542087	0.310305	10	9	13	11	0.818527	-0.0605202	0.00184682	0.879047	GAK_HUMAN Cyclin-G-associated kinase OS=Homo sapiens GN=GAK PE=1 SV=2
Q9H1B7	I2BPL_HUMAN	-0.386776	-0.0780376	0.962612	0.401036	-0.491955	-0.527515	-1.31959	-0.48332	-0.552497	0.792131	1.34292	0.879846	-0.00778495	0.0123305	5	4	8	4	0.603889	-0.275116	0.0275924	0.879006	I2BPL_HUMAN Interferon regulatory factor 2-binding protein-like OS=Homo sapiens GN=IRF2BPL PE=1 SV=1
Q9NVQ4	FAIM1_HUMAN	0.261991	-0.497015	-0.321455	0.407177	-0.188245	-0.166619	-0.544734	-0.659051	-0.480868	0.709536	0.635928	-0.50497	0.637038	1.6921	4	3	4	3	0.633926	-0.243202	0.0130427	0.877128	FAIM1_HUMAN Fas apoptotic inhibitory molecule 1 OS=Homo sapiens GN=FAIM PE=1 SV=1
O15379	HDAC3_HUMAN	-0.309799	-0.408631	-0.0738444	0.388668	0.17642	0.938892	1.47641	0.564422	1.16013	2.06204	1.69736	0.65665	0.982432	1.16057	1	3	2	2	1.31181	0.434741	0.0279165	0.87707	HDAC3_HUMAN Histone deacetylase 3 OS=Homo sapiens GN=HDAC3 PE=1 SV=2
Q15654	TRIP6_HUMAN	-0.106557	0.654308	0.0718717	-1.51646	-0.496193	-0.337647	0.401469	0.183745	0.253116	1.34189	1.43521	-0.398206	0.429944	1.07177	11	7	12	14	0.776121	-0.0991492	0.0406459	0.87527	TRIP6_HUMAN Thyroid receptor-interacting protein 6 OS=Homo sapiens GN=TRIP6 PE=1 SV=3
Q9UN37	VPS4A_HUMAN	-0.377093	-0.668331	0.657142	0.417784	0.318989	0.154293	0.0723903	0.0448636	0.0191151	-0.46123	0.782021	0.583553	1.95036	1.87177	12	7	8	10	0.945294	0.071017	0.0359622	0.874277	VPS4A_HUMAN Vacuolar protein sorting-associated protein 4A OS=Homo sapiens GN=VPS4A PE=1 SV=1
O14910	LIN7A_HUMAN	-1.12485	-0.772908	0.402507	-0.817444	-0.573319	-0.605633	-0.953529	-0.455674	-0.935919	0.764284	0.519259	0.0361117	-0.317358	0.110955	2	1	2	2	0.22265	-0.64853	0.0039587	0.87118	LIN7A_HUMAN Protein lin-7 homolog A OS=Homo sapiens GN=LIN7A PE=1 SV=2
R4GNB2	R4GNB2_HUMAN	-0.429473	0.707115	0.110711	0.6231	-0.338244	-1.13751	-0.302579	-0.617023	-0.55779	0.071467	0.749092	1.17153	0.596105	0.67903	3	3	2	2	0.653445	-0.215744	0.0134617	0.869189	R4GNB2_HUMAN DENN domain-containing protein 4C OS=Homo sapiens GN=DENND4C PE=1 SV=1
O95833	CLIC3_HUMAN	-0.646387	-0.121309	-1.25832	-0.620109	0.10581	-0.466364	-0.860708	-1.14039	-0.706318	-1.16332	0.452653	0.778431	0.432624	0.669906	6	4	6	4	0.234058	-0.6349	0.0201916	0.868958	CLIC3_HUMAN Chloride intracellular channel protein 3 OS=Homo sapiens GN=CLIC3 PE=1 SV=2
Q8TEB1	DCA11_HUMAN	-0.192021	-0.311437	-1.12283	-1.75588	0.0119074	-0.213911	-0.818195	-1.04309	-0.321821	-0.535533	-0.600991	0.984194	0.893797	0.371055	2	3	3	2	0.222504	-0.640808	0.0335728	0.863312	DCA11_HUMAN DDB1- and CUL4-associated factor 11 OS=Homo sapiens GN=DCAF11 PE=1 SV=1
Q9NRG7	D39U1_HUMAN	-1.20876	0.242708	-1.09817	-0.343576	0.217889	-0.359238	-1.73732	-0.957454	-0.657833	0.0521668	0.0275699	-0.0526557	0.585372	0.424187	3	2	3	1	0.207328	-0.655751	0.0179919	0.863079	D39U1_HUMAN Epimerase family protein SDR39U1 OS=Homo sapiens GN=SDR39U1 PE=1 SV=2
P53367	ARFP1_HUMAN	-0.188237	-0.544637	0.584525	-0.51794	-1.24377	-1.52653	-1.24678	-1.18505	-0.650281	-0.590398	0.440466	0.992664	-0.349674	0.188447	8	3	6	5	0.136301	-0.7243	0.0351964	0.860601	ARFP1_HUMAN Arfaptin-1 OS=Homo sapiens GN=ARFIP1 PE=1 SV=2
P55957	BID_HUMAN	-1.41782	-0.802414	-0.555874	0.569045	0.476806	0.355782	-0.506514	0.0926648	-0.18227	0.95804	0.979291	1.56496	0.0394118	-0.335034	1	1	1	1	0.641334	-0.218955	0.0480219	0.86029	BID_HUMAN BH3-interacting domain death agonist OS=Homo sapiens GN=BID PE=1 SV=1
Q6PD62	CTR9_HUMAN	-0.808497	-0.770055	0.444854	-1.84234	0.267785	0.245148	0.244521	0.371091	0.37925	0.199296	1.27246	0.375961	0.845807	0.79129	34	19	28	36	0.696962	-0.163139	0.0463683	0.860101	CTR9_HUMAN RNA polymerase-associated protein CTR9 homolog OS=Homo sapiens GN=CTR9 PE=1 SV=1
Q9UHR6	ZNHI2_HUMAN	0.304417	0.380293	-0.0866009	1.08681	0.118662	0.37411	-0.0640449	-0.586427	-0.275855	0.757132	0.863525	0.719057	1.10809	1.54084	10	6	4	5	0.997728	0.139041	0.00419632	0.858687	ZNHI2_HUMAN Zinc finger HIT domain-containing protein 2 OS=Homo sapiens GN=ZNHIT2 PE=1 SV=1
Q9Y2L5	TPPC8_HUMAN	0.373024	-0.660764	-0.0725783	-0.00612378	-0.338324	-0.369612	-1.13046	-1.09732	-1.01554	-0.179735	0.252417	1.22868	0.1516	0.429865	4	5	3	1	0.376566	-0.479744	0.0134924	0.85631	TPPC8_HUMAN Trafficking protein particle complex subunit 8 OS=Homo sapiens GN=TRAPPC8 PE=1 SV=2
O96017	CHK2_HUMAN	-0.546522	-0.356557	0.00918441	-0.372282	-0.519881	-0.485172	-1.26674	-0.852398	-1.23837	0.113873	1.00784	0.572707	-0.0400125	-0.502938	2	7	3	2	0.230294	-0.625415	0.00765361	0.85571	CHK2_HUMAN Serine/threonine-protein kinase Chk2 OS=Homo sapiens GN=CHEK2 PE=1 SV=1
O75170	PP6R2_HUMAN	-0.425775	-0.58415	-1.62444	-0.616691	0.179548	0.778456	0.342141	0.717386	0.653664	0.947475	1.06748	0.455682	0.673095	0.811443	7	9	6	2	0.791035	-0.064429	0.0416652	0.855464	PP6R2_HUMAN Serine/threonine-protein phosphatase 6 regulatory subunit 2 OS=Homo sapiens GN=PPP6R2 PE=1 SV=2
Q96IJ6	GMPPA_HUMAN	-1.56546	-1.09391	-1.08341	-0.498365	-0.399784	-0.869135	-0.412564	-0.678332	0.135151	-0.310907	0.0688798	0.543606	0.0930151	0.286808	4	6	1	2	0.13628	-0.718423	0.00490716	0.854704	GMPPA_HUMAN Mannose-1-phosphate guanyltransferase alpha OS=Homo sapiens GN=GMPPA PE=1 SV=1
P16383	GCFC2_HUMAN	0.373013	-0.221192	-0.0939488	-0.66925	-1.09452	-1.02731	-1.1647	-1.22818	-0.713546	-0.228783	0.436076	0.50775	-0.212209	0.524222	2	3	4	1	0.205411	-0.648848	0.0107224	0.854259	GCFC2_HUMAN GC-rich sequence DNA-binding factor 2 OS=Homo sapiens GN=GCFC2 PE=1 SV=2
Q9NVJ2	ARL8B_HUMAN	-1.13662	0.225566	-1.84524	-1.60442	-0.628133	-1.23464	-1.84034	-1.76103	-1.45512	-0.843903	0.26039	-0.39297	-0.220484	-0.801121	4	5	5	5	-0.399618	-1.25333	0.0284449	0.853712	ARL8B_HUMAN ADP-ribosylation factor-like protein 8B OS=Homo sapiens GN=ARL8B PE=1 SV=1
Q14764	MVP_HUMAN	0.178939	-1.19032	-2.01992	-0.871006	-1.25415	-1.19671	-1.27159	-1.18731	-0.921978	0.333227	0.383669	0.518062	-1.08482	-1.29005	18	15	22	19	-0.227984	-1.08156	0.0472023	0.853578	MVP_HUMAN Major vault protein OS=Homo sapiens GN=MVP PE=1 SV=4
Q9BQL6	FERM1_HUMAN	0.699446	-1.43393	0.108761	-1.26083	-1.08581	-1.14984	-1.17501	-0.733804	-1.18315	0.14768	0.439737	0.618246	-0.53302	-0.418702	4	6	5	3	0.0507883	-0.801574	0.0391091	0.852362	FERM1_HUMAN Fermitin family homolog 1 OS=Homo sapiens GN=FERMT1 PE=1 SV=1
Q9NRG4	SMYD2_HUMAN	0.541303	0.0907426	-0.676399	-1.01051	-0.17972	-0.160052	-0.927588	-1.74494	-1.0139	0.141983	0.577508	-0.461794	0.541009	0.637387	3	6	4	3	0.287219	-0.564563	0.0319797	0.851781	SMYD2_HUMAN N-lysine methyltransferase SMYD2 OS=Homo sapiens GN=SMYD2 PE=1 SV=2
O43929	ORC4_HUMAN	0.204618	-0.0245241	-0.318609	0.289557	1.44929	1.25192	0.766407	1.00801	0.854673	1.14871	1.64434	0.840121	1.78615	1.87513	8	10	6	6	1.45889	0.609037	0.0176173	0.849855	ORC4_HUMAN Origin recognition complex subunit 4 OS=Homo sapiens GN=ORC4 PE=1 SV=2
Q9H4I3	TRABD_HUMAN	-1.01676	-0.185176	-1.47686	-0.314075	0.181104	0.0545341	0.553723	-0.00847139	0.649017	0.278967	0.500407	1.42869	0.356968	0.791905	7	5	4	3	0.671387	-0.173663	0.032423	0.84505	TRABD_HUMAN TraB domain-containing protein OS=Homo sapiens GN=TRABD PE=1 SV=1
O00189	AP4M1_HUMAN	-0.689458	-0.9483	0.836153	-0.229962	0.136991	0.359506	-0.373706	-0.594159	-0.630005	0.454035	0.931687	-0.0903455	0.457474	1.27804	3	2	2	2	0.606177	-0.236993	0.0191168	0.84317	AP4M1_HUMAN AP-4 complex subunit mu-1 OS=Homo sapiens GN=AP4M1 PE=1 SV=2
Q9H2M9	RBGPR_HUMAN	-0.102129	-0.871405	0.950755	-1.18575	-0.544443	-0.788095	-0.666831	-1.14365	-1.03776	0.18682	0.0787898	0.808566	0.0145798	0.129948	23	16	14	19	0.243741	-0.598813	0.0227329	0.842553	RBGPR_HUMAN Rab3 GTPase-activating protein non-catalytic subunit OS=Homo sapiens GN=RAB3GAP2 PE=1 SV=1
P53680	AP2S1_HUMAN	-0.00610026	-0.467503	-0.341821	-1.03523	0.0821666	0.274763	0.256198	0.0291533	-1.06983	1.2526	1.1443	-0.192684	0.518623	0.222665	6	3	2	2	0.589102	-0.253134	0.0176598	0.842236	AP2S1_HUMAN AP-2 complex subunit sigma OS=Homo sapiens GN=AP2S1 PE=1 SV=2
Q9NR31	SAR1A_HUMAN	-0.948782	-0.545033	-1.23056	-2.25771	-1.25215	-1.94027	-1.71954	-1.83523	-2.41437	-0.964493	-0.507889	-0.311728	-0.627236	-1.24355	9	5	4	5	-0.73098	-1.57151	0.0178339	0.840535	SAR1A_HUMAN GTP-binding protein SAR1a OS=Homo sapiens GN=SAR1A PE=1 SV=1
Q9NRL3	STRN4_HUMAN	-0.967493	-0.839518	0.883831	-0.252966	-0.604934	-0.263031	-0.632146	-0.641507	-1.10477	1.28304	1.00896	-0.556123	-0.121002	0.122461	8	4	5	2	0.347467	-0.491392	0.0409848	0.838859	STRN4_HUMAN Striatin-4 OS=Homo sapiens GN=STRN4 PE=1 SV=2
Q9BPZ7	SIN1_HUMAN	-1.42517	0.209775	1.11734	-0.195842	0.195	0.10619	-0.0109264	-0.469871	0.0915448	0.357498	0.883577	0.774414	0.893719	1.0684	4	4	2	1	0.795522	-0.0424404	0.0218777	0.837962	SIN1_HUMAN Target of rapamycin complex 2 subunit MAPKAP1 OS=Homo sapiens GN=MAPKAP1 PE=1 SV=2
P36639	8ODP_HUMAN	-1.81722	-0.207651	0.142461	-0.641679	-0.232161	-0.26663	-1.14036	-0.752638	-0.799898	-0.427294	0.202738	0.25852	0.434948	0.536674	5	5	5	3	0.201117	-0.635086	0.0149053	0.836203	8ODP_HUMAN 7,8-dihydro-8-oxoguanine triphosphatase OS=Homo sapiens GN=NUDT1 PE=1 SV=3
P20936	RASA1_HUMAN	-0.58121	-0.694364	0.98006	-0.876549	0.113318	-0.168385	-0.273937	-0.270091	-0.764304	-0.0653567	0.192438	0.636912	0.881331	1.12366	6	7	4	3	0.553797	-0.281718	0.0176053	0.835515	RASA1_HUMAN Ras GTPase-activating protein 1 OS=Homo sapiens GN=RASA1 PE=1 SV=1
Q15386	UBE3C_HUMAN	-1.30306	-1.09678	-0.359228	-1.05369	0.0482138	-0.267706	-0.669216	-0.477866	-0.407664	-0.0152183	-0.0103996	1.48824	0.022078	-0.415724	12	7	6	7	0.213796	-0.620777	0.0201409	0.834573	UBE3C_HUMAN Ubiquitin-protein ligase E3C OS=Homo sapiens GN=UBE3C PE=1 SV=3
P51665	PSMD7_HUMAN	-0.0974059	-1.18542	-0.136944	0.0301726	-0.619922	-0.51532	-1.50208	-1.32125	-0.945345	0.000126231	0.0304801	1.3932	-0.381254	-0.371578	8	8	4	4	0.134194	-0.69928	0.034506	0.833474	PSMD7_HUMAN 26S proteasome non-ATPase regulatory subunit 7 OS=Homo sapiens GN=PSMD7 PE=1 SV=2
O75970	MPDZ_HUMAN	-0.260933	0.65738	-1.1766	-0.598196	-0.0698457	0.274027	0.321444	0.108211	-0.0322234	1.2142	0.871745	-0.0389871	0.341654	1.33575	7	8	4	3	0.744874	-0.0863045	0.0203579	0.831178	MPDZ_HUMAN Multiple PDZ domain protein OS=Homo sapiens GN=MPDZ PE=1 SV=2
Q9HA65	TBC17_HUMAN	0.279405	0.170365	-1.35274	-0.01754	-0.538904	-0.933133	-0.752554	-1.20005	-0.725098	0.298469	0.875577	0.0455681	-0.0622792	0.175633	1	1	2	2	0.266594	-0.563361	0.0151042	0.829955	TBC17_HUMAN TBC1 domain family member 17 OS=Homo sapiens GN=TBC1D17 PE=1 SV=2
P19838	NFKB1_HUMAN	0.278695	1.0475	-0.399515	0.25153	0.366639	0.268613	-0.0610252	0.0743688	0.291445	0.719325	0.926817	2.49674	0.676929	0.481763	6	7	9	6	1.06032	0.235361	0.0231692	0.824955	NFKB1_HUMAN Nuclear factor NF-kappa-B p105 subunit OS=Homo sapiens GN=NFKB1 PE=1 SV=2
Q27J81	INF2_HUMAN	0.533841	-0.351864	-0.443072	-0.383106	-0.334039	-0.44931	-0.319739	-0.197096	-0.0685156	0.547876	1.17612	1.59251	-0.236461	-0.0742947	24	15	20	17	0.601151	-0.223656	0.0146753	0.824806	INF2_HUMAN Inverted formin-2 OS=Homo sapiens GN=INF2 PE=1 SV=2
Q9Y6D9	MD1L1_HUMAN	-0.487519	-0.150013	0.272106	-1.02071	-0.80269	-0.856056	-0.0206031	-0.262486	-0.27883	0.733025	1.08285	0.196305	-0.051444	0.15716	22	7	18	18	0.42358	-0.400756	0.00576476	0.824336	MD1L1_HUMAN Mitotic spindle assembly checkpoint protein MAD1 OS=Homo sapiens GN=MAD1L1 PE=1 SV=2
Q8N0Z6	TTC5_HUMAN	0.371359	-0.222192	0.250683	-0.0222095	-0.60804	-0.215517	-0.959527	-1.27671	-1.4402	1.34245	0.0187963	0.519995	0.0835756	-0.155392	3	6	3	3	0.361884	-0.458039	0.0393607	0.819924	TTC5_HUMAN Tetratricopeptide repeat protein 5 OS=Homo sapiens GN=TTC5 PE=1 SV=2
Q15776	ZKSC8_HUMAN	-0.262595	-0.665808	0.631861	-0.415635	0.528041	-0.0150879	0.370683	0.626112	0.0612771	0.19473	1.69378	1.37394	0.593422	0.709112	1	1	2	2	0.912998	0.0954277	0.0161421	0.81757	ZKSC8_HUMAN Zinc finger protein with KRAB and SCAN domains 8 OS=Homo sapiens GN=ZKSCAN8 PE=1 SV=2
P53597	SUCA_HUMAN	-1.35979	-0.492599	-0.44018	-1.37672	0.0386104	-0.610763	-0.769651	-0.702845	-0.805517	-1.22944	-0.37607	0.840797	0.469325	0.750511	10	7	5	5	0.0910253	-0.724384	0.0371531	0.815409	SUCA_HUMAN Succinate--CoA ligase [ADP/GDP-forming] subunit alpha, mitochondrial OS=Homo sapiens GN=SUCLG1 PE=1 SV=4
O15056	SYNJ2_HUMAN	-0.874458	-0.0308994	0.403821	-0.743907	-0.507251	-0.719771	0.391325	0.220552	0.33987	0.596748	0.233878	1.43077	0.526191	0.438838	3	8	7	8	0.645285	-0.168969	0.0148047	0.814254	SYNJ2_HUMAN Synaptojanin-2 OS=Homo sapiens GN=SYNJ2 PE=1 SV=3
Q99584	S10AD_HUMAN	0.0188959	0.388172	-0.104529	0.966173	-1.14257	-0.154999	-1.01162	-0.771232	-0.597601	-0.00901038	0.586701	0.832898	0.290368	1.0272	6	3	4	4	0.545631	-0.267701	0.0337576	0.813333	S10AD_HUMAN Protein S100-A13 OS=Homo sapiens GN=S100A13 PE=1 SV=1
Q15047	SETB1_HUMAN	0.450075	-0.174178	-1.43405	0.23033	0.190518	0.413859	0.646058	0.735108	0.783493	0.134776	1.2219	1.14139	0.928543	1.66217	4	7	4	3	1.01776	0.204579	0.0434081	0.813177	SETB1_HUMAN Histone-lysine N-methyltransferase SETDB1 OS=Homo sapiens GN=SETDB1 PE=1 SV=1
Q9Y485	DMXL1_HUMAN	-0.160259	0.0836776	-0.242476	-0.781615	-0.32918	-0.583253	-0.102339	0.484725	0.392826	0.521512	1.03383	0.852721	0.118962	0.850574	8	6	5	2	0.67552	-0.137544	0.00327098	0.813063	DMXL1_HUMAN DmX-like protein 1 OS=Homo sapiens GN=DMXL1 PE=1 SV=3
Q96L50	LLR1_HUMAN	0.0442978	-1.49336	-0.19215	-1.26874	0.0218852	-0.490627	-0.465981	0.549996	0.592699	0.543507	0.576173	0.437966	0.666644	0.331699	2	2	1	2	0.511198	-0.30022	0.0308504	0.811418	LLR1_HUMAN Leucine-rich repeat protein 1 OS=Homo sapiens GN=LRR1 PE=1 SV=2
P53618	COPB_HUMAN	0.328944	-2.08378	-0.933704	-1.04092	-0.925097	-1.38425	-1.51036	-1.49914	-1.50491	-1.26777	0.167314	0.388047	-0.512244	-0.583908	34	26	28	28	-0.361713	-1.17258	0.0498031	0.810867	COPB_HUMAN Coatomer subunit beta OS=Homo sapiens GN=COPB1 PE=1 SV=3
P17706	PTN2_HUMAN	-1.75024	-0.131022	0.685819	-0.773946	0.181897	-0.187142	0.185442	-0.357544	0.0855318	0.902685	0.466319	0.333053	0.74201	0.454227	6	2	4	6	0.579659	-0.229022	0.0295094	0.808681	PTN2_HUMAN Tyrosine-protein phosphatase non-receptor type 2 OS=Homo sapiens GN=PTPN2 PE=1 SV=2
Q53R41	FAKD1_HUMAN	-0.377546	-1.1628	0.0398289	-0.597956	-0.175149	-0.303815	0.0771732	-1.06876	-0.620174	0.639392	-0.123365	-0.235262	0.822049	0.6081	2	7	2	1	0.342183	-0.465466	0.00802593	0.807649	FAKD1_HUMAN FAST kinase domain-containing protein 1, mitochondrial OS=Homo sapiens GN=FASTKD1 PE=1 SV=1
Q9UDY8	MALT1_HUMAN	0.747429	-0.551722	-0.683866	-1.4556	-0.628696	-0.774197	0.578756	-0.192338	0.256311	-0.376159	0.917889	0.92152	0.326	0.74064	3	6	6	2	0.505978	-0.300436	0.0498828	0.806414	MALT1_HUMAN Mucosa-associated lymphoid tissue lymphoma translocation protein 1 OS=Homo sapiens GN=MALT1 PE=1 SV=1
Q9UNE7	CHIP_HUMAN	-0.241279	-0.938767	0.0927858	-0.648462	0.158375	-0.13544	-0.385477	-0.330572	-0.323431	-0.0875069	1.03105	0.77588	0.414324	0.362119	13	5	15	14	0.499173	-0.305807	0.00219826	0.80498	CHIP_HUMAN E3 ubiquitin-protein ligase CHIP OS=Homo sapiens GN=STUB1 PE=1 SV=2
Q5JSH3	WDR44_HUMAN	-0.665184	0.102142	-0.144052	0.408231	-0.876051	-1.08793	-0.999177	-1.43903	-1.0716	-0.0737318	0.249693	1.38664	-0.36741	-0.38111	7	8	28	17	0.162816	-0.641407	0.0498037	0.804222	WDR44_HUMAN WD repeat-containing protein 44 OS=Homo sapiens GN=WDR44 PE=1 SV=1
Q15311	RBP1_HUMAN	0.571523	0.493879	-0.362842	-0.716492	-0.249609	-0.551001	-0.778251	-0.42854	-0.884407	-0.268642	0.182727	1.20713	0.412145	0.849574	1	3	4	3	0.476587	-0.32286	0.0215217	0.799446	RBP1_HUMAN RalA-binding protein 1 OS=Homo sapiens GN=RALBP1 PE=1 SV=3
Q8N1B4	VPS52_HUMAN	0.0994865	-0.148348	0.794142	-1.21384	-0.426782	-0.944377	-0.192638	-0.771626	-0.643454	0.988551	0.0696705	0.709674	-0.0294752	0.285541	3	6	4	4	0.404792	-0.383048	0.0255144	0.78784	VPS52_HUMAN Vacuolar protein sorting-associated protein 52 homolog OS=Homo sapiens GN=VPS52 PE=1 SV=1
Q96EV2	RBM33_HUMAN	-0.443932	0.300898	0.399588	-1.2354	0.895302	0.98893	-0.119055	-0.153484	0.0550691	0.386958	0.464169	1.36771	1.01126	1.09104	6	5	10	8	0.864227	0.0764354	0.0389168	0.787792	RBM33_HUMAN RNA-binding protein 33 OS=Homo sapiens GN=RBM33 PE=1 SV=3
Q15814	TBCC_HUMAN	-0.283302	-0.818418	0.108948	-1.43391	-0.762861	-0.551375	-0.211169	0.373892	-0.360407	0.583083	0.751684	0.83476	-0.361837	-0.0598208	2	2	2	2	0.349574	-0.437623	0.0214292	0.787197	TBCC_HUMAN Tubulin-specific chaperone C OS=Homo sapiens GN=TBCC PE=1 SV=2
Q9NRR5	UBQL4_HUMAN	-0.726243	-0.658441	-1.14757	-0.356036	-0.82669	-0.507301	-0.890314	-1.12333	-0.839004	-0.48275	-0.0480991	1.44875	-0.461733	-0.451437	3	8	5	4	0.000945731	-0.786104	0.019545	0.78705	UBQL4_HUMAN Ubiquilin-4 OS=Homo sapiens GN=UBQLN4 PE=1 SV=2
M0R3A8	M0R3A8_HUMAN	-0.398907	0.236941	-0.0350286	-0.276479	-0.112114	-1.42903	0.333717	-0.915964	0.0279009	-0.367157	1.75465	0.155778	0.464342	0.49886	1	1	3	1	0.501294	-0.28544	0.0496575	0.786735	M0R3A8_HUMAN PIH1 domain-containing protein 1 (Fragment) OS=Homo sapiens GN=PIH1D1 PE=1 SV=1
Q04726	TLE3_HUMAN	0.745293	0.26136	0.129905	-0.932108	-1.04971	-0.985109	-0.836976	-0.637409	-0.565956	1.2623	-0.13852	0.265828	-0.00616426	0.394962	2	5	11	8	0.355681	-0.430079	0.041113	0.78576	TLE3_HUMAN Transducin-like enhancer protein 3 OS=Homo sapiens GN=TLE3 PE=1 SV=2
Q9UI30	TR112_HUMAN	-0.402093	-0.346456	0.813586	-0.0572001	0.00200554	-0.050717	-0.665141	-0.857784	-1.14458	0.507605	0.730096	0.213285	0.310112	0.64792	6	7	5	4	0.481804	-0.300931	0.0133806	0.782734	TR112_HUMAN Multifunctional methyltransferase subunit TRM112-like protein OS=Homo sapiens GN=TRMT112 PE=1 SV=1
Q8TAT6	NPL4_HUMAN	0.0999339	-0.840371	-0.496607	-0.389629	-1.30814	-1.02281	-0.495957	-0.689825	-0.739811	-0.0611429	-0.0258886	1.66488	-0.557004	-0.37827	14	14	12	11	0.128514	-0.65369	0.0398444	0.782205	NPL4_HUMAN Nuclear protein localization protein 4 homolog OS=Homo sapiens GN=NPLOC4 PE=1 SV=3
O14641	DVL2_HUMAN	0.532478	0.0828321	-0.235016	-0.218044	-0.308737	-0.54054	-0.756592	-0.108335	-0.664678	0.160167	0.0582209	0.97232	0.583519	0.900079	3	3	4	5	0.534861	-0.246292	0.00463629	0.781154	DVL2_HUMAN Segment polarity protein dishevelled homolog DVL-2 OS=Homo sapiens GN=DVL2 PE=1 SV=1
P10586	PTPRF_HUMAN	0.628803	-1.08102	0.228823	-0.806819	-0.133478	-0.192827	-0.225016	-0.154432	-0.0190419	0.730421	0.477013	0.790935	0.522249	0.409733	7	6	9	4	0.58607	-0.195001	0.00637643	0.781071	PTPRF_HUMAN Receptor-type tyrosine-protein phosphatase F OS=Homo sapiens GN=PTPRF PE=1 SV=2
O00186	STXB3_HUMAN	-0.0158776	-1.4379	-1.00299	-0.593674	-0.169359	-0.485766	-0.609536	-0.673501	-0.574533	-0.324915	0.333769	0.621355	0.0857019	0.0835237	11	8	10	5	0.159887	-0.618126	0.00431577	0.778013	STXB3_HUMAN Syntaxin-binding protein 3 OS=Homo sapiens GN=STXBP3 PE=1 SV=2
Q99615	DNJC7_HUMAN	-0.49433	-1.87715	-0.0609708	0.192543	-0.166772	-0.296203	-0.306595	-0.479432	-0.520329	-0.446964	0.607265	0.6389	0.286882	0.565939	28	9	26	24	0.330404	-0.445471	0.025393	0.775875	DNJC7_HUMAN DnaJ homolog subfamily C member 7 OS=Homo sapiens GN=DNAJC7 PE=1 SV=2
P29597	TYK2_HUMAN	-0.359449	0.72613	0.704676	-0.427857	0.77935	0.338668	0.0979793	-0.11532	-0.691476	0.720488	0.0708903	0.382848	1.44782	1.84083	6	1	1	1	0.892575	0.116967	0.0444804	0.775608	TYK2_HUMAN Non-receptor tyrosine-protein kinase TYK2 OS=Homo sapiens GN=TYK2 PE=1 SV=3
P51553	IDH3G_HUMAN	-0.652195	-0.413772	-1.24588	-1.18045	-0.258345	-0.765379	-0.954776	-0.633946	-0.652673	-1.42803	-0.297937	1.15187	0.382104	0.304789	11	6	10	10	0.0225587	-0.750824	0.0438937	0.773383	IDH3G_HUMAN Isocitrate dehydrogenase [NAD] subunit gamma, mitochondrial OS=Homo sapiens GN=IDH3G PE=1 SV=1
Q9UJF2	NGAP_HUMAN	-0.551294	0.0542433	0.382909	-0.718382	0.878549	0.588327	0.840612	0.94703	0.965647	1.41444	0.777957	1.05488	1.23617	1.25648	11	4	10	6	1.14799	0.376405	0.0263688	0.771582	NGAP_HUMAN Ras GTPase-activating protein nGAP OS=Homo sapiens GN=RASAL2 PE=1 SV=2
Q8WU79	SMAP2_HUMAN	-0.434979	0.788765	-0.829273	-1.08516	-0.0921303	-0.0670164	0.0232689	-0.528492	-0.335293	-0.570243	1.09789	1.0202	0.301538	0.582747	2	5	3	3	0.486426	-0.284479	0.0371198	0.770905	SMAP2_HUMAN Stromal membrane-associated protein 2 OS=Homo sapiens GN=SMAP2 PE=1 SV=1
Q13952	NFYC_HUMAN	-0.131262	0.373744	0.234538	0.540277	0.397446	0.960411	1.44289	1.29311	1.15925	1.4842	1.253	1.60457	1.10384	1.88952	6	4	5	3	1.46703	0.696712	0.0128995	0.770313	NFYC_HUMAN Nuclear transcription factor Y subunit gamma OS=Homo sapiens GN=NFYC PE=1 SV=3
P54619	AAKG1_HUMAN	-0.918119	-0.989395	0.640828	-1.00829	-0.251373	-0.333591	-0.398052	-0.452291	-0.523107	0.161041	0.485625	-0.379351	0.372033	0.84404	6	5	7	9	0.296678	-0.470377	0.0159106	0.767054	AAKG1_HUMAN 5'-AMP-activated protein kinase subunit gamma-1 OS=Homo sapiens GN=PRKAG1 PE=1 SV=1
Q8NBQ5	DHB11_HUMAN	-0.957644	-0.78808	-1.27942	-1.506	-0.410604	-0.202495	-0.613686	-0.917774	-1.05378	-0.00988477	0.120501	0.185152	-0.161797	-0.59696	7	5	3	5	-0.0925977	-0.858831	0.00354307	0.766234	DHB11_HUMAN Estradiol 17-beta-dehydrogenase 11 OS=Homo sapiens GN=HSD17B11 PE=1 SV=3
Q5VSL9	STRP1_HUMAN	-0.594117	0.383057	0.114839	-0.598462	-0.0939975	-0.271784	-1.0334	-1.28913	-0.455534	-0.607663	0.491018	0.578114	0.665348	0.565266	6	8	4	3	0.338417	-0.426504	0.0240571	0.76492	STRP1_HUMAN Striatin-interacting protein 1 OS=Homo sapiens GN=STRIP1 PE=1 SV=1
P46199	IF2M_HUMAN	-0.322817	-0.270624	0.5863	-1.21732	0.338507	0.145711	-0.255775	-0.343458	-0.328641	0.459014	0.137304	0.546444	0.94453	0.804916	8	8	13	7	0.578442	-0.185346	0.0112665	0.763788	IF2M_HUMAN Translation initiation factor IF-2, mitochondrial OS=Homo sapiens GN=MTIF2 PE=1 SV=2
Q9Y5K5	UCHL5_HUMAN	0.037852	-0.894147	-0.181823	-0.389767	-0.665163	-0.803777	-0.65052	-0.705195	-0.824885	-0.176383	0.389391	0.978306	-0.149288	-0.0706516	15	10	12	11	0.194275	-0.564158	0.00421247	0.758433	UCHL5_HUMAN Ubiquitin carboxyl-terminal hydrolase isozyme L5 OS=Homo sapiens GN=UCHL5 PE=1 SV=3
Q9Y4E6	WDR7_HUMAN	-1.12901	-0.720377	0.489366	0.0422659	-0.0257471	0.220278	0.255746	0.292939	0.223772	0.563731	1.71501	0.378079	0.784557	0.154583	3	6	2	3	0.719191	-0.0389739	0.0312114	0.758165	WDR7_HUMAN WD repeat-containing protein 7 OS=Homo sapiens GN=WDR7 PE=1 SV=2
Q96BM9	ARL8A_HUMAN	-1.33658	-0.427401	-0.20568	-2.12952	-0.331424	-0.560351	-1.19395	-1.13501	-1.28788	-1.0103	-0.140288	0.232207	-0.366187	0.290356	1	3	1	3	-0.198843	-0.956423	0.0410018	0.75758	ARL8A_HUMAN ADP-ribosylation factor-like protein 8A OS=Homo sapiens GN=ARL8A PE=1 SV=1
Q9UNS1	TIM_HUMAN	0.00238614	-0.04614	1.54143	0.483005	0.688182	0.955862	0.769941	0.853591	1.1024	1.41293	1.69687	0.466361	1.71429	2.02264	12	15	10	10	1.46262	0.705629	0.0269187	0.756989	TIM_HUMAN Protein timeless homolog OS=Homo sapiens GN=TIMELESS PE=1 SV=2
P61970	NTF2_HUMAN	0.288872	-0.275916	-0.823061	-0.321857	-1.4075	-0.630911	-1.24338	-0.575403	-1.04372	0.244171	0.95394	0.486779	-1.02021	-0.234585	4	3	5	5	0.0860198	-0.670319	0.0470716	0.756339	NTF2_HUMAN Nuclear transport factor 2 OS=Homo sapiens GN=NUTF2 PE=1 SV=1
Q9H267	VP33B_HUMAN	0.400142	-0.969071	0.733663	-1.11655	-0.464659	-0.493266	-0.821031	-0.92861	-0.782761	-0.410842	0.456697	0.0831924	0.625696	0.531045	8	9	10	10	0.257157	-0.493571	0.038531	0.750728	VP33B_HUMAN Vacuolar protein sorting-associated protein 33B OS=Homo sapiens GN=VPS33B PE=1 SV=2
Q9UJ70	NAGK_HUMAN	-1.20178	-0.687552	-1.12513	0.0546773	-0.884041	-0.720783	-0.737156	-0.641578	-0.60663	0.950205	-0.138353	0.332623	-0.569405	-0.47327	4	3	6	5	0.02036	-0.727774	0.014103	0.748134	NAGK_HUMAN N-acetyl-D-glucosamine kinase OS=Homo sapiens GN=NAGK PE=1 SV=4
Q9NWY4	HPF1_HUMAN	-0.455885	0.23289	-1.04527	-1.29828	0.21575	-0.393514	-0.41929	-0.950195	0.2052	0.342418	-0.0440364	0.373987	0.451528	0.41345	4	4	2	3	0.307469	-0.434288	0.0179208	0.741757	HPF1_HUMAN Histone PARylation factor 1 OS=Homo sapiens GN=HPF1 PE=1 SV=2
P46939	UTRO_HUMAN	0.0807513	0.574615	-0.700994	-1.73771	0.211181	0.048829	-0.033537	0.186287	0.301794	0.310538	0.39544	0.629041	0.890562	0.88131	45	33	24	24	0.621378	-0.118754	0.0441847	0.740132	UTRO_HUMAN Utrophin OS=Homo sapiens GN=UTRN PE=1 SV=2
Q9UL33	TPC2L_HUMAN	0.550609	-1.29993	0.972696	-0.390548	0.155322	0.0300277	-0.232523	-0.40716	-0.32684	0.445032	1.22225	0.299057	0.185258	0.998462	1	1	1	3	0.630011	-0.105372	0.0451085	0.735383	TPC2L_HUMAN Trafficking protein particle complex subunit 2-like protein OS=Homo sapiens GN=TRAPPC2L PE=1 SV=1
Q96S59	RANB9_HUMAN	-0.407992	-0.208219	-1.02427	-0.27094	-1.24705	-1.60017	-0.685608	-0.0269096	-0.724512	-0.153106	0.505738	0.793055	-0.397355	-0.539082	6	5	9	5	0.0418499	-0.688408	0.0326067	0.730258	RANB9_HUMAN Ran-binding protein 9 OS=Homo sapiens GN=RANBP9 PE=1 SV=1
Q8WVC0	LEO1_HUMAN	-1.1845	-0.367101	-1.41362	-0.877573	-0.296484	-0.130281	-0.373298	-0.360998	-0.1205	0.263698	0.845011	-0.744733	0.297207	0.13883	9	5	12	13	0.160003	-0.569373	0.0243357	0.729376	LEO1_HUMAN RNA polymerase-associated protein LEO1 OS=Homo sapiens GN=LEO1 PE=1 SV=1
Q9BRQ8	AIFM2_HUMAN	-1.34967	-0.711347	-1.19093	-0.522809	-0.474713	-0.850038	-0.546652	-0.502373	-0.398816	-0.123334	-0.128934	0.285202	0.0868145	-0.110294	6	8	8	9	0.00189117	-0.727484	0.000826081	0.729375	AIFM2_HUMAN Apoptosis-inducing factor 2 OS=Homo sapiens GN=AIFM2 PE=1 SV=1
P57721	PCBP3_HUMAN	-0.181329	0.358905	0.694304	-1.30102	0.0372444	0.238789	0.337942	0.145339	0.366492	0.762589	1.125	0.812821	0.54755	0.785574	11	6	8	8	0.806706	0.0774073	0.0187516	0.729299	PCBP3_HUMAN Poly(rC)-binding protein 3 OS=Homo sapiens GN=PCBP3 PE=2 SV=2
Q9UBS0	KS6B2_HUMAN	-0.41754	0.538142	-0.0846208	0.314116	0.260383	-0.0924412	-0.394775	-0.612926	-0.810115	0.329767	0.301835	-0.182638	0.936991	1.52388	1	3	2	3	0.581968	-0.14442	0.0305044	0.726388	KS6B2_HUMAN Ribosomal protein S6 kinase beta-2 OS=Homo sapiens GN=RPS6KB2 PE=1 SV=2
Q9BT25	HAUS8_HUMAN	0.366312	0.545354	-0.149765	0.916837	-0.0195924	-0.140179	-0.46327	-0.813559	-1.07367	0.907096	0.750827	-0.0895441	0.645752	0.950532	2	2	3	3	0.632933	-0.0923921	0.0433483	0.725325	HAUS8_HUMAN HAUS augmin-like complex subunit 8 OS=Homo sapiens GN=HAUS8 PE=1 SV=3
Q9UFF9	CNOT8_HUMAN	-0.0257009	-0.834963	-0.401498	-0.672978	-0.471608	-0.241254	0.721148	0.00998817	1.04365	0.831917	0.248867	1.25503	0.166029	0.639412	2	3	2	1	0.628251	-0.0970242	0.0418143	0.725275	CNOT8_HUMAN CCR4-NOT transcription complex subunit 8 OS=Homo sapiens GN=CNOT8 PE=1 SV=1
Q6ZN55	ZN574_HUMAN	-0.707432	0.735374	-0.732811	0.0616851	0.104829	0.126183	0.813181	0.46886	0.450737	0.610944	0.37126	1.05094	0.528651	1.78864	3	3	2	1	0.870088	0.146734	0.0400508	0.723354	ZN574_HUMAN Zinc finger protein 574 OS=Homo sapiens GN=ZNF574 PE=1 SV=2
Q9BSJ2	GCP2_HUMAN	-0.17894	-0.239947	0.327443	-1.40193	-0.414402	-0.475674	-0.567851	-0.591673	-0.523402	-0.606303	0.564423	0.554298	0.337325	0.489822	9	7	14	8	0.267913	-0.45182	0.0178682	0.719733	GCP2_HUMAN Gamma-tubulin complex component 2 OS=Homo sapiens GN=TUBGCP2 PE=1 SV=2
Q9NWV8	BABA1_HUMAN	-0.258794	-0.860222	-0.0730728	0.468452	-0.423324	-0.115237	-0.437959	-0.793564	-0.2519	1.47256	0.293204	0.463099	-0.227513	0.0426398	4	2	4	7	0.408799	-0.305069	0.0242046	0.713868	BABA1_HUMAN BRISC and BRCA1-A complex member 1 OS=Homo sapiens GN=BABAM1 PE=1 SV=1
Q86VS8	HOOK3_HUMAN	-0.925332	-0.662456	0.57752	0.188283	-0.163857	-0.0288451	-1.29128	-0.243229	0.00523216	-0.262638	0.459084	0.819099	0.513716	0.622108	4	7	4	2	0.430274	-0.282662	0.0329063	0.712936	HOOK3_HUMAN Protein Hook homolog 3 OS=Homo sapiens GN=HOOK3 PE=1 SV=2
Q5VT06	CE350_HUMAN	-0.421476	-0.385177	1.48081	-0.391423	-0.0635263	-0.0999448	0.448731	0.574834	0.2531	1.27114	1.06067	0.332497	0.958857	0.685735	8	5	2	3	0.861781	0.155103	0.0390934	0.706678	CE350_HUMAN Centrosome-associated protein 350 OS=Homo sapiens GN=CEP350 PE=1 SV=1
Q9UPW0	FOXJ3_HUMAN	-0.244215	-0.00441269	-0.585566	-0.338633	0.607257	0.776619	0.692119	-0.241735	-0.0329757	1.11653	0.0247899	0.0188661	1.36764	1.32641	2	3	4	1	0.770848	0.0698285	0.0475027	0.70102	FOXJ3_HUMAN Forkhead box protein J3 OS=Homo sapiens GN=FOXJ3 PE=1 SV=2
Q92560	BAP1_HUMAN	0.620187	0.355718	-0.768111	-1.2301	0.0736337	0.453886	0.204005	-0.106306	-0.0851515	0.40175	0.545204	0.374633	0.900697	1.00569	4	4	3	2	0.645595	-0.0535817	0.0318333	0.699177	BAP1_HUMAN Ubiquitin carboxyl-terminal hydrolase BAP1 OS=Homo sapiens GN=BAP1 PE=1 SV=2
Q9UGI8	TES_HUMAN	-0.0864555	-0.252982	0.160926	-0.620217	-0.084542	-0.120516	0.180393	-0.0540761	-0.010172	0.438394	1.76388	0.42694	0.375185	-0.0407701	31	9	20	20	0.592726	-0.0986269	0.0155472	0.691353	TES_HUMAN Testin OS=Homo sapiens GN=TES PE=1 SV=1
Q96G74	OTUD5_HUMAN	0.197522	-0.448259	0.279265	-0.226777	-0.443985	-1.0264	0.221497	-1.21891	-0.0591534	0.0648752	0.938576	0.758998	0.00378218	0.147898	3	5	4	3	0.382826	-0.3028	0.0320264	0.685626	OTUD5_HUMAN OTU domain-containing protein 5 OS=Homo sapiens GN=OTUD5 PE=1 SV=1
Q9BUF5	TBB6_HUMAN	-1.05367	-1.54153	-0.549843	-0.69704	-0.473655	-0.273675	-0.397681	-0.528138	-0.293088	-0.671912	0.256008	-0.301204	0.332187	0.571409	17	15	16	13	0.0372975	-0.645368	0.017775	0.682666	TBB6_HUMAN Tubulin beta-6 chain OS=Homo sapiens GN=TUBB6 PE=1 SV=1
Q9BXF6	RFIP5_HUMAN	-0.35572	-0.902292	-0.858921	0.324955	0.612962	0.484898	-0.642256	-0.119403	-0.382312	0.44581	0.771587	0.264001	0.731674	0.142452	7	8	8	5	0.471105	-0.204232	0.0299259	0.675337	RFIP5_HUMAN Rab11 family-interacting protein 5 OS=Homo sapiens GN=RAB11FIP5 PE=1 SV=1
Q96JP5	ZFP91_HUMAN	-0.324951	1.17526	0.199786	-0.453991	-0.012508	-0.361537	0.492335	-0.183917	0.161919	0.508272	0.0308827	1.03603	1.0661	1.11563	3	2	6	4	0.751384	0.0769324	0.0325055	0.674451	ZFP91_HUMAN E3 ubiquitin-protein ligase ZFP91 OS=Homo sapiens GN=ZFP91 PE=1 SV=1
Q9NZW5	MPP6_HUMAN	-1.07765	-0.686971	0.526009	-1.81351	-0.434082	-0.856475	-0.509922	-0.736412	-0.462003	0.161753	0.250875	-0.152519	0.0286889	-0.290119	12	3	11	7	-0.000264255	-0.672336	0.0394923	0.672071	MPP6_HUMAN MAGUK p55 subfamily member 6 OS=Homo sapiens GN=MPP6 PE=1 SV=2
Q9UJA5	TRM6_HUMAN	-1.23582	-1.52033	-1.1282	0.0844151	-0.253248	-0.548241	-0.751609	-0.654702	-0.554541	0.122107	0.51268	0.312688	-0.511339	-0.7505	5	4	6	6	-0.0628727	-0.729141	0.0387377	0.666269	TRM6_HUMAN tRNA (adenine(58)-N(1))-methyltransferase non-catalytic subunit TRM6 OS=Homo sapiens GN=TRMT6 PE=1 SV=1
P33993	MCM7_HUMAN	-0.388184	-0.742425	0.538502	-0.631723	0.166099	0.130623	-0.0143506	-0.106973	0.0346336	-0.0107857	0.655235	0.407546	0.685056	1.00647	34	27	32	36	0.548704	-0.112644	0.0116023	0.661348	MCM7_HUMAN DNA replication licensing factor MCM7 OS=Homo sapiens GN=MCM7 PE=1 SV=4
Q8N806	UBR7_HUMAN	-0.183224	0.0161036	-0.636948	0.121082	0.00503697	0.157842	-0.809629	-0.816773	-0.728085	-0.469666	1.03679	0.886382	0.183889	0.0556582	1	6	9	4	0.338611	-0.319399	0.0350236	0.65801	UBR7_HUMAN Putative E3 ubiquitin-protein ligase UBR7 OS=Homo sapiens GN=UBR7 PE=1 SV=2
O95684	FR1OP_HUMAN	0.369042	0.411127	-0.583147	-0.767196	-0.528027	-0.593307	-0.142276	-0.61524	-0.18528	0.892256	-0.0446109	1.26813	-0.190953	-0.130354	4	4	5	4	0.358893	-0.2927	0.0469842	0.651593	FR1OP_HUMAN FGFR1 oncogene partner OS=Homo sapiens GN=FGFR1OP PE=1 SV=1
P84022	SMAD3_HUMAN	-0.0795092	0.259768	-0.239823	-1.25985	-0.146564	-0.0760754	0.327611	0.0790299	0.0611376	0.546986	1.00792	-0.510557	0.785448	0.76287	4	1	2	3	0.518533	-0.119363	0.0458724	0.637896	SMAD3_HUMAN Mothers against decapentaplegic homolog 3 OS=Homo sapiens GN=SMAD3 PE=1 SV=1
Q9Y6D5	BIG2_HUMAN	0.227794	-0.051317	-1.20722	-0.837484	-0.738961	-1.20157	-1.29233	-1.04699	-1.07448	-0.911879	0.302424	-0.243382	-0.0850694	0.0985033	4	7	6	5	-0.167881	-0.802506	0.0474387	0.634625	BIG2_HUMAN Brefeldin A-inhibited guanine nucleotide-exchange protein 2 OS=Homo sapiens GN=ARFGEF2 PE=1 SV=3
Q8TEW0	PARD3_HUMAN	0.420932	0.14709	-0.368938	-0.584421	-0.0628623	0.772308	0.37491	0.544404	0.610895	0.939665	0.508854	1.21552	0.568901	0.944692	12	8	10	3	0.835527	0.206035	0.0182472	0.629492	PARD3_HUMAN Partitioning defective 3 homolog OS=Homo sapiens GN=PARD3 PE=1 SV=2
Q13485	SMAD4_HUMAN	0.13996	0.243651	-1.02133	0.0503884	-0.481162	-0.542976	-0.238803	-0.556078	-0.425988	0.288018	0.94459	0.377629	-0.169954	0.0320667	4	3	6	5	0.29447	-0.314704	0.0207541	0.609174	SMAD4_HUMAN Mothers against decapentaplegic homolog 4 OS=Homo sapiens GN=SMAD4 PE=1 SV=1
P82663	RT25_HUMAN	-1.38089	-0.0575959	-0.964007	-0.35416	0.0943849	-0.528123	-0.185221	-0.15508	-0.229902	-0.13997	-0.178332	-0.281908	0.885041	0.669427	5	3	4	3	0.190852	-0.417843	0.0487834	0.608695	RT25_HUMAN 28S ribosomal protein S25, mitochondrial OS=Homo sapiens GN=MRPS25 PE=1 SV=1
P61221	ABCE1_HUMAN	-0.885967	-0.49213	0.240846	-1.38061	-0.734775	-0.543345	-0.857532	-0.951114	-1.08914	-0.066744	-0.0791994	0.287967	-0.46773	-0.386521	17	12	15	15	-0.142446	-0.743751	0.0224577	0.601306	ABCE1_HUMAN ATP-binding cassette sub-family E member 1 OS=Homo sapiens GN=ABCE1 PE=1 SV=1
Q5VW36	FOCAD_HUMAN	0.596974	-0.620591	-0.0297187	0.193662	0.0802628	-0.317247	-0.582291	-0.522493	-0.581872	-0.124691	0.600462	0.81531	0.19829	0.456563	4	2	5	2	0.389187	-0.198146	0.0245754	0.587333	FOCAD_HUMAN Focadhesin OS=Homo sapiens GN=FOCAD PE=1 SV=1

## Sheet: Supplemental Table S2
Supplemental Table S2
UniProtKB Entry	UniProtKB Entry name	Exp. 1	Exp. 1	Exp. 2	Exp. 2	Exp. 3	Exp.3	Exp. 4	Exp. 4	Exp. 4	Exp. 4	Exp. 4	Exp. 4	Exp. 1	Exp. 2	Exp. 3	Exp. 4	Zq average IHSF058	Zq average C	p-value IHSF058 vs C	D Zq (IHSF058 - C)	Description
		Zq C-1	Zq C-2	Zq C-3	Zq C-4	Zq C-5	Zq C-6	Zq C-7	Zq C-8	Zq C-9	Zq IHSF058-1	Zq IHSF058-2	Zq IHSF058-3	Np	Np	Np	Np
P21266	GSTM3_HUMAN	-1.58741	-0.829946	0.306599	-4.04703	1.54253	0.373028	-0.89217	-1.3871	0.184471	3.10876	3.11706	4.33024	20	15	16	16	3.51869	-0.704114	0.00150855	4.2228	GSTM3_HUMAN Glutathione S-transferase Mu 3 OS=Homo sapiens GN=GSTM3 PE=1 SV=3
P52895	AK1C2_HUMAN	-1.99374	-1.36823	-2.91576	-3.68148	0.505191	-0.37946	-1.04484	-1.26881	-0.372758	2.0747	1.45507	3.50208	24	22	16	16	2.34395	-1.3911	0.00125632	3.73505	AK1C2_HUMAN Aldo-keto reductase family 1 member C2 OS=Homo sapiens GN=AKR1C2 PE=1 SV=3
O60566	BUB1B_HUMAN	-1.74017	-2.05733	-3.20342	-4.6187	-0.851185	-0.83849	-0.983373	-1.2285	-1.0609	2.00415	1.65437	1.75914	20	14	16	21	1.80589	-1.84245	0.00080659	3.64834	BUB1B_HUMAN Mitotic checkpoint serine/threonine-protein kinase BUB1 beta OS=Homo sapiens GN=BUB1B PE=1 SV=3
P00374	DYR_HUMAN	-3.45903	0.0296776	0.396237	1.27624	0.544199	0.35386	-0.330279	-0.882242	-0.491888	3.23158	3.08214	3.5947	11	9	8	10	3.30281	-0.284803	0.0012607	3.58761	DYR_HUMAN Dihydrofolate reductase OS=Homo sapiens GN=DHFR PE=1 SV=2
P09488	GSTM1_HUMAN	-2.03532	-1.41475	-0.34763	-2.49368	1.27786	0.162469	-0.628387	-0.541237	0.220534	2.46291	2.52793	3.65572	12	8	10	11	2.88219	-0.64446	0.000701306	3.52665	GSTM1_HUMAN Glutathione S-transferase Mu 1 OS=Homo sapiens GN=GSTM1 PE=1 SV=3
P04792	HSPB1_HUMAN	-4.9168	-0.742321	1.06512	0.0115995	-0.534941	-1.26919	-1.38654	-1.72	-1.60848	2.09933	2.08152	2.59287	22	13	20	17	2.25791	-1.23351	0.00522316	3.49141	HSPB1_HUMAN Heat shock protein beta-1 OS=Homo sapiens GN=HSPB1 PE=1 SV=2
AAB82573	RENILLA LUCIFERASE	-2.763	-3.43602	0.017932	0.633102	-0.241995	-0.504139	-0.251131	-0.41886	-0.660373	2.84321	2.32729	2.11396	9	5	4	3	2.42816	-0.847165	0.00229041	3.27532	UPI000002D71C_RENILLA_LUCIFERASE
P12004	PCNA_HUMAN	-0.173481	-1.31587	-1.52906	-1.2188	-2.14995	-1.74957	-1.63214	-1.44594	-1.33744	2.39391	1.78617	1.37971	24	10	13	18	1.85327	-1.39469	3.51607e-06	3.24796	PCNA_HUMAN Proliferating cell nuclear antigen OS=Homo sapiens GN=PCNA PE=1 SV=1
Q8TCG1	CIP2A_HUMAN	-2.18573	-2.00963	-1.28966	-1.58079	-0.44566	-0.704423	-0.991938	-0.951497	-0.542575	1.87425	1.59226	2.3863	23	12	17	17	1.95094	-1.1891	1.16083e-05	3.14004	CIP2A_HUMAN Protein CIP2A OS=Homo sapiens GN=KIAA1524 PE=1 SV=2
P40763	STAT3_HUMAN	-2.23966	-0.995358	-1.71988	-2.52045	-0.16925	-0.671462	-1.47613	-1.7131	-1.25561	1.60015	1.38503	2.17147	26	15	19	19	1.71888	-1.41788	4.48283e-05	3.13676	STAT3_HUMAN Signal transducer and activator of transcription 3 OS=Homo sapiens GN=STAT3 PE=1 SV=2
Q6KB66	K2C80_HUMAN	-2.75339	-0.640662	-1.17715	-3.22534	0.0116508	-0.323222	0.167619	0.244477	-0.72905	2.47323	3.06312	0.984041	32	7	16	17	2.17347	-0.936118	0.00337632	3.10958	K2C80_HUMAN Keratin, type II cytoskeletal 80 OS=Homo sapiens GN=KRT80 PE=1 SV=2
Q14116	IL18_HUMAN	-1.25648	-0.49138	-0.778226	0.288459	-0.404468	-0.653591	-0.427032	-0.384905	-0.574636	2.43333	2.57274	2.08496	4	1	3	4	2.36368	-0.520251	4.89463e-07	2.88393	IL18_HUMAN Interleukin-18 OS=Homo sapiens GN=IL18 PE=1 SV=1
Q96B23	CR025_HUMAN	-1.66529	-0.499646	-0.169127	-3.08431	-1.74938	-1.2595	-1.87024	-2.74226	-2.2295	0.859828	1.19415	1.48602	3	3	4	3	1.18	-1.69658	0.000548864	2.87658	CR025_HUMAN Uncharacterized protein C18orf25 OS=Homo sapiens GN=C18orf25 PE=1 SV=2
Q00653	NFKB2_HUMAN	-2.14777	-0.0305059	-1.40609	-1.04123	-0.0315229	-0.635057	-0.937807	-1.30059	-1.04356	1.83391	1.61331	1.94282	16	9	25	24	1.79668	-0.952681	4.47258e-05	2.74936	NFKB2_HUMAN Nuclear factor NF-kappa-B p100 subunit OS=Homo sapiens GN=NFKB2 PE=1 SV=4
Q13309	SKP2_HUMAN	-1.40584	-1.02106	-1.11472	-2.4281	-0.00169499	-0.407109	0.356814	0.222599	0.231134	2.14692	1.90756	1.9197	5	6	3	3	1.99139	-0.618665	0.000933704	2.61006	SKP2_HUMAN S-phase kinase-associated protein 2 OS=Homo sapiens GN=SKP2 PE=1 SV=2
Q13085	ACACA_HUMAN	-1.71424	-1.67058	-0.693472	-3.46507	-0.606572	-1.07556	-1.38449	-1.36518	-0.851662	1.10829	0.928215	1.47085	44	48	49	46	1.16912	-1.4252	0.000557908	2.59432	ACACA_HUMAN Acetyl-CoA carboxylase 1 OS=Homo sapiens GN=ACACA PE=1 SV=2
Q96BD8	SKA1_HUMAN	-2.6103	-0.535683	1.11234	-2.0267	-0.149618	0.282671	-1.07784	-1.06319	-1.26932	2.21232	1.63918	1.41301	1	3	1	3	1.75484	-0.815294	0.00405292	2.57013	SKA1_HUMAN Spindle and kinetochore-associated protein 1 OS=Homo sapiens GN=SKA1 PE=1 SV=1
P11172	UMPS_HUMAN	-1.65505	-1.09465	-1.18836	-2.4347	0.206322	-0.833818	-1.44283	-1.56422	-1.31165	0.986463	0.975382	1.92328	21	13	17	18	1.29504	-1.25766	0.000217545	2.5527	UMPS_HUMAN Uridine 5'-monophosphate synthase OS=Homo sapiens GN=UMPS PE=1 SV=1
Q96R06	SPAG5_HUMAN	-1.92788	-0.596424	-0.977259	-1.76775	-0.585481	-0.565606	-0.325701	-0.355197	-0.490263	1.60934	1.34143	2.03926	18	13	12	8	1.66334	-0.843507	5.23941e-05	2.50685	SPAG5_HUMAN Sperm-associated antigen 5 OS=Homo sapiens GN=SPAG5 PE=1 SV=2
P48507	GSH0_HUMAN	-0.317955	-1.73435	0.292099	-2.82031	-1.54567	-2.12253	-2.01917	-2.48218	-2.3176	0.909256	0.54516	0.985174	9	8	5	11	0.813197	-1.67419	0.0023682	2.48738	GSH0_HUMAN Glutamate--cysteine ligase regulatory subunit OS=Homo sapiens GN=GCLM PE=1 SV=1
Q9NSV4	DIAP3_HUMAN	-1.80303	-1.63119	-0.0243593	-2.34088	-0.458826	-0.676794	-0.35419	-0.37262	-0.367615	1.8016	1.43458	1.47906	23	18	15	15	1.57175	-0.892168	0.000506349	2.46391	DIAP3_HUMAN Protein diaphanous homolog 3 OS=Homo sapiens GN=DIAPH3 PE=1 SV=4
Q15054	DPOD3_HUMAN	-1.96155	-0.631275	0.0573774	-2.39778	0.000132542	-0.353579	0.140316	-0.490256	-0.059378	1.62155	1.38472	2.41429	13	2	7	6	1.80685	-0.632888	0.00165101	2.43974	DPOD3_HUMAN DNA polymerase delta subunit 3 OS=Homo sapiens GN=POLD3 PE=1 SV=2
Q15021	CND1_HUMAN	-1.81493	-0.971395	-0.582754	-1.50244	0.283354	-0.212625	0.139153	-0.104959	-0.0140422	2.14364	1.85043	1.73078	42	39	33	29	1.90828	-0.531182	0.000288952	2.43947	CND1_HUMAN Condensin complex subunit 1 OS=Homo sapiens GN=NCAPD2 PE=1 SV=3
P60484	PTEN_HUMAN	-2.66039	-1.8491	-0.087096	1.51166	0.370847	0.0675691	-0.438912	-0.743312	-0.543922	1.9674	1.75235	2.12538	4	2	5	4	1.94837	-0.485849	0.00743264	2.43422	PTEN_HUMAN Phosphatidylinositol 3,4,5-trisphosphate 3-phosphatase and dual-specificity protein phosphatase PTEN OS=Homo sapiens GN=PTEN PE=1 SV=1
Q15349	KS6A2_HUMAN	-1.81125	-0.596527	0.408043	-1.18074	-0.0464931	0.118916	-0.505059	-0.918569	-0.52575	1.605	1.63827	2.36948	3	2	1	2	1.87091	-0.561936	0.000202367	2.43285	KS6A2_HUMAN Ribosomal protein S6 kinase alpha-2 OS=Homo sapiens GN=RPS6KA2 PE=1 SV=2
Q8IY22	CMIP_HUMAN	-0.866531	-0.172871	0.131046	-0.0656311	-0.665196	-0.580446	-0.794727	-0.885077	-0.57502	1.91055	1.78381	2.02409	1	3	2	3	1.90615	-0.497162	8.40055e-07	2.40331	CMIP_HUMAN C-Maf-inducing protein OS=Homo sapiens GN=CMIP PE=1 SV=3
P42226	STAT6_HUMAN	-1.84507	-0.115288	-1.94328	-1.85224	-0.549761	-0.766501	-1.30542	-0.991418	-0.855004	1.07627	0.948833	1.73275	9	6	11	5	1.25262	-1.136	0.000148496	2.38861	STAT6_HUMAN Signal transducer and activator of transcription 6 OS=Homo sapiens GN=STAT6 PE=1 SV=1
O15111	IKKA_HUMAN	-1.05046	-0.521845	0.11979	-0.935731	-0.0648813	-0.391924	-0.290369	-0.382494	-0.294344	2.17293	1.46653	2.17012	4	7	7	6	1.93652	-0.423584	3.15903e-06	2.36011	IKKA_HUMAN Inhibitor of nuclear factor kappa-B kinase subunit alpha OS=Homo sapiens GN=CHUK PE=1 SV=2
Q9NPI6	DCP1A_HUMAN	-2.22536	-1.39397	-0.283278	-1.81731	-0.301796	-0.348296	-0.419847	-0.930715	-0.404602	1.69762	1.09343	1.54568	2	5	11	10	1.44558	-0.902798	0.000391548	2.34838	DCP1A_HUMAN mRNA-decapping enzyme 1A OS=Homo sapiens GN=DCP1A PE=1 SV=2
Q96GX5	GWL_HUMAN	-2.15315	-1.34242	-1.60873	-0.957205	0.152251	-0.183204	0.0917052	-0.422268	0.129386	1.56969	1.3771	1.99585	7	4	7	3	1.64754	-0.699293	0.00106834	2.34684	GWL_HUMAN Serine/threonine-protein kinase greatwall OS=Homo sapiens GN=MASTL PE=1 SV=1
Q6NXE6	ARMC6_HUMAN	-1.42193	-0.365315	-1.99819	-0.682261	0.152115	-0.160422	0.11473	-0.409813	-0.168224	1.56998	1.70729	2.06205	13	8	13	13	1.77977	-0.548812	0.000331653	2.32859	ARMC6_HUMAN Armadillo repeat-containing protein 6 OS=Homo sapiens GN=ARMC6 PE=1 SV=2
P49643	PRI2_HUMAN	-2.26596	-1.80838	-1.48396	-2.54445	-0.162046	-0.398739	-0.627835	-0.854148	-0.45011	0.820917	1.01952	1.59574	10	10	10	10	1.14539	-1.17729	0.00146495	2.32269	PRI2_HUMAN DNA primase large subunit OS=Homo sapiens GN=PRIM2 PE=1 SV=2
Q53GA4	PHLA2_HUMAN	-2.06152	-1.36406	-0.0897071	-0.417558	-0.0437947	-0.125665	0.174433	-0.168935	-0.540121	1.97216	1.86281	1.57746	6	1	1	1	1.80415	-0.515213	0.000361949	2.31936	PHLA2_HUMAN Pleckstrin homology-like domain family A member 2 OS=Homo sapiens GN=PHLDA2 PE=1 SV=2
Q7Z5K2	WAPL_HUMAN	-1.7621	-0.824884	0.293766	-1.81959	0.679748	0.707473	0.231909	-0.145388	0.251942	2.1036	1.86314	2.16713	22	17	20	18	2.04462	-0.265236	0.00273908	2.30986	WAPL_HUMAN Wings apart-like protein homolog OS=Homo sapiens GN=WAPL PE=1 SV=1
P02511	CRYAB_HUMAN	-3.82643	0.504476	0.682019	-0.472573	0.0545116	-0.40578	-1.62016	-1.65014	-0.825953	0.74986	1.10933	2.52259	6	2	2	3	1.46059	-0.840003	0.0250678	2.3006	CRYAB_HUMAN Alpha-crystallin B chain OS=Homo sapiens GN=CRYAB PE=1 SV=2
Q9UK32	KS6A6_HUMAN	-1.46866	-2.54226	-0.0676249	-0.0314252	1.48096	0.880014	-0.202941	-0.165211	0.264633	2.20096	1.70465	2.33135	1	1	1	2	2.07899	-0.205834	0.00971429	2.28482	KS6A6_HUMAN Ribosomal protein S6 kinase alpha-6 OS=Homo sapiens GN=RPS6KA6 PE=1 SV=1
P61956	SUMO2_HUMAN	-1.16893	-1.16297	0.371831	0.175772	-1.47762	-1.15805	-1.49345	-1.66267	-1.64822	1.19135	1.24194	1.29708	3	1	3	2	1.24346	-1.02492	0.000556525	2.26838	SUMO2_HUMAN Small ubiquitin-related modifier 2 OS=Homo sapiens GN=SUMO2 PE=1 SV=3
Q13671	RIN1_HUMAN	-2.29487	-1.49803	-1.44929	1.08755	-0.066825	-0.0425398	0.0128714	-0.119199	-0.0333411	2.08756	1.52933	1.71848	9	8	7	3	1.77846	-0.489297	0.004677	2.26776	RIN1_HUMAN Ras and Rab interactor 1 OS=Homo sapiens GN=RIN1 PE=1 SV=4
Q9Y3I1	FBX7_HUMAN	-1.92163	-0.615361	1.37574	-0.28707	0.805843	-0.523019	-0.288263	-0.315661	-0.519882	2.01301	1.76138	2.25269	4	7	5	4	2.00903	-0.254367	0.00225255	2.2634	FBX7_HUMAN F-box only protein 7 OS=Homo sapiens GN=FBXO7 PE=1 SV=1
Q00613	HSF1_HUMAN	-1.86285	-0.386729	-2.54755	-0.859439	0.100219	-0.260758	0.38547	-0.249027	0.162842	1.87914	1.48521	1.56789	7	1	4	3	1.64408	-0.613091	0.00338864	2.25717	HSF1_HUMAN Heat shock factor protein 1 OS=Homo sapiens GN=HSF1 PE=1 SV=1
Q7Z3E5	ARMC9_HUMAN	-1.18252	-1.9056	-1.45703	-1.84089	-0.208996	-0.777981	-0.767122	-0.74245	-0.54851	1.14754	0.958701	1.48573	3	6	1	4	1.19732	-1.0479	9.33464e-05	2.24522	ARMC9_HUMAN LisH domain-containing protein ARMC9 OS=Homo sapiens GN=ARMC9 PE=1 SV=2
Q9UNF1	MAGD2_HUMAN	-2.58426	-0.584495	-1.37811	-2.43607	0.126707	-0.545151	-0.931247	-1.03596	-0.650829	0.703792	0.927139	1.72502	30	13	28	28	1.11865	-1.11327	0.00245834	2.23192	MAGD2_HUMAN Melanoma-associated antigen D2 OS=Homo sapiens GN=MAGED2 PE=1 SV=2
Q9HBM1	SPC25_HUMAN	-2.00621	-0.451785	-0.720491	-2.05084	-0.342042	-0.427782	-0.408236	-1.19418	-0.736486	0.911857	1.57259	1.36753	6	4	2	6	1.28399	-0.92645	0.000340653	2.21044	SPC25_HUMAN Kinetochore protein Spc25 OS=Homo sapiens GN=SPC25 PE=1 SV=1
Q15398	DLGP5_HUMAN	-0.869626	-1.45019	1.07831	-1.55973	-0.853645	-0.903463	-1.31929	-1.55828	-1.54495	1.1218	1.19025	1.31853	14	3	8	8	1.21019	-0.997874	0.00129289	2.20806	DLGP5_HUMAN Disks large-associated protein 5 OS=Homo sapiens GN=DLGAP5 PE=1 SV=2
Q9UJY1	HSPB8_HUMAN	-0.827455	0.16564	-0.648108	0.606644	-0.294545	0.126537	-0.286747	-0.422671	-0.0904304	2.09155	1.67759	2.27735	11	4	3	6	2.0155	-0.185682	1.32579e-05	2.20118	HSPB8_HUMAN Heat shock protein beta-8 OS=Homo sapiens GN=HSPB8 PE=1 SV=1
Q13546	RIPK1_HUMAN	-1.56915	-0.953405	0.651287	-0.890655	-0.158055	-0.542018	-1.31141	-1.423	-1.02023	0.800998	1.42668	1.95629	10	9	5	4	1.39466	-0.801848	0.000650665	2.1965	RIPK1_HUMAN Receptor-interacting serine/threonine-protein kinase 1 OS=Homo sapiens GN=RIPK1 PE=1 SV=3
Q7Z7E8	UB2Q1_HUMAN	-1.10922	-1.38061	-0.228275	-1.79921	-0.465212	-0.802066	-1.29307	-1.11938	-1.12934	0.929608	1.06774	1.47167	6	7	6	7	1.15634	-1.03626	2.33867e-05	2.1926	UB2Q1_HUMAN Ubiquitin-conjugating enzyme E2 Q1 OS=Homo sapiens GN=UBE2Q1 PE=1 SV=1
Q53EZ4	CEP55_HUMAN	-0.677419	-0.822535	1.70003	-1.23148	0.0848377	-0.115738	-0.0150299	-0.681398	-0.173687	1.8283	1.98235	2.10744	17	6	14	7	1.9727	-0.214713	0.00143687	2.18741	CEP55_HUMAN Centrosomal protein of 55 kDa OS=Homo sapiens GN=CEP55 PE=1 SV=3
P83436	COG7_HUMAN	-2.24351	-1.4777	0.0517601	-0.395417	-0.601145	-1.41534	-1.53841	-1.2055	-0.977644	1.12114	0.8608	1.26877	5	11	7	5	1.08357	-1.08921	0.000399695	2.17278	COG7_HUMAN Conserved oligomeric Golgi complex subunit 7 OS=Homo sapiens GN=COG7 PE=1 SV=1
Q8TEX9	IPO4_HUMAN	-1.68735	-1.62898	-1.76147	-1.85817	-0.110131	-0.119563	-0.209441	-0.263274	0.232367	1.45229	1.06718	1.49366	23	27	16	16	1.33771	-0.82289	0.00216475	2.1606	IPO4_HUMAN Importin-4 OS=Homo sapiens GN=IPO4 PE=1 SV=2
Q15121	PEA15_HUMAN	-0.526774	-0.746523	0.416879	-1.06449	-0.509675	-1.00447	-0.679477	-0.674227	-0.291057	1.75676	1.38018	1.59481	2	3	5	4	1.57725	-0.564424	1.18744e-05	2.14167	PEA15_HUMAN Astrocytic phosphoprotein PEA-15 OS=Homo sapiens GN=PEA15 PE=1 SV=2
Q68CZ2	TENS3_HUMAN	-1.58849	-0.405973	-1.05064	-0.826132	-0.0143948	-0.310023	-0.355679	-0.344966	-0.434056	1.49858	1.38382	1.76529	16	17	16	15	1.54923	-0.592262	2.53333e-05	2.14149	TENS3_HUMAN Tensin-3 OS=Homo sapiens GN=TNS3 PE=1 SV=2
Q9Y4P1	ATG4B_HUMAN	-0.488424	-1.0746	-0.301966	-0.936027	-0.315611	-0.80403	-1.86148	-1.26584	-2.14089	1.47375	0.527955	1.35537	1	3	7	2	1.11903	-1.02099	0.000440592	2.14001	ATG4B_HUMAN Cysteine protease ATG4B OS=Homo sapiens GN=ATG4B PE=1 SV=2
P04183	KITH_HUMAN	-2.60092	0.187483	-3.8365	1.03369	0.312342	-0.0850181	-0.214459	-0.275049	-0.1697	1.13358	1.73829	1.66074	7	6	7	8	1.51087	-0.627569	0.0445406	2.13844	KITH_HUMAN Thymidine kinase, cytosolic OS=Homo sapiens GN=TK1 PE=1 SV=2
P15924	DESP_HUMAN	-1.06853	-0.00510343	0.341079	0.167147	0.798008	0.812731	0.767037	1.36223	-0.0199277	2.70648	3.28769	1.46904	64	41	60	48	2.48773	0.350519	0.00164767	2.13722	DESP_HUMAN Desmoplakin OS=Homo sapiens GN=DSP PE=1 SV=3
Q9H8V3	ECT2_HUMAN	-1.31953	0.147297	-2.26004	-2.68187	0.838749	0.468805	0.498423	0.167693	0.362377	1.5718	1.65525	1.91273	12	12	6	4	1.71326	-0.419788	0.0216849	2.13305	ECT2_HUMAN Protein ECT2 OS=Homo sapiens GN=ECT2 PE=1 SV=4
P42224	STAT1_HUMAN	-1.95993	-0.776404	0.101145	-1.94287	-0.258202	-0.833595	-0.804238	-0.997452	-0.661999	1.06282	1.0312	1.57051	32	20	18	19	1.22151	-0.903727	0.000462339	2.12524	STAT1_HUMAN Signal transducer and activator of transcription 1-alpha/beta OS=Homo sapiens GN=STAT1 PE=1 SV=2
Q9Y2V2	CHSP1_HUMAN	-4.45999	-2.28902	-1.10769	-2.0192	-1.26721	-1.33951	-1.87623	-1.79026	-1.93336	0.00562204	0.0655778	0.268096	3	1	2	3	0.113099	-2.00916	0.00519971	2.12226	CHSP1_HUMAN Calcium-regulated heat-stable protein 1 OS=Homo sapiens GN=CARHSP1 PE=1 SV=2
Q15555	MARE2_HUMAN	-2.62033	-1.50034	-0.565029	-0.784599	0.458475	0.266118	-0.374863	-0.483649	-0.487294	1.2069	1.08075	2.01879	9	9	12	9	1.43548	-0.676834	0.00412054	2.11231	MARE2_HUMAN Microtubule-associated protein RP/EB family member 2 OS=Homo sapiens GN=MAPRE2 PE=1 SV=1
Q9P253	VPS18_HUMAN	-1.11132	-1.35271	-2.04639	-0.719344	-0.502364	-0.414157	-0.273106	-0.580089	-0.328232	1.22142	1.40837	1.22683	5	5	7	7	1.28554	-0.81419	0.000134752	2.09973	VPS18_HUMAN Vacuolar protein sorting-associated protein 18 homolog OS=Homo sapiens GN=VPS18 PE=1 SV=2
Q8NHU6	TDRD7_HUMAN	-1.82896	-1.09683	-0.596879	-0.630527	0.480384	0.0585199	0.0337777	-0.744056	0.0915779	1.8393	1.51739	1.49573	6	7	2	4	1.61747	-0.470333	0.000678985	2.08781	TDRD7_HUMAN Tudor domain-containing protein 7 OS=Homo sapiens GN=TDRD7 PE=1 SV=2
P06493	CDK1_HUMAN	-1.99546	-1.0954	2.22398	-0.178526	-0.137075	-0.467396	-0.834758	-1.30013	-0.911752	1.37696	1.21445	2.0779	19	16	15	19	1.55644	-0.521836	0.0159364	2.07827	CDK1_HUMAN Cyclin-dependent kinase 1 OS=Homo sapiens GN=CDK1 PE=1 SV=3
Q5T6V5	CI064_HUMAN	-0.307352	-1.63833	-1.77333	-2.45746	-1.25032	-1.47203	-2.84216	-2.38867	-2.42424	-0.128857	-0.0117331	0.851611	5	5	9	9	0.237007	-1.83932	0.00180637	2.07633	CI064_HUMAN UPF0553 protein C9orf64 OS=Homo sapiens GN=C9orf64 PE=1 SV=1
P51692	STA5B_HUMAN	-1.02507	0.296157	-0.775439	-0.944212	-0.060386	-0.65974	-0.78701	-1.65036	-1.28493	1.18525	1.01328	1.70248	8	10	8	8	1.30034	-0.765666	0.000222829	2.066	STA5B_HUMAN Signal transducer and activator of transcription 5B OS=Homo sapiens GN=STAT5B PE=1 SV=2
Q9BTE7	DCNL5_HUMAN	0.20786	-0.452427	0.269393	-1.15038	0.127607	-0.0776836	-0.64218	-0.78962	-0.758672	1.67003	1.45805	1.98112	6	4	7	7	1.70306	-0.3629	6.38216e-05	2.06596	DCNL5_HUMAN DCN1-like protein 5 OS=Homo sapiens GN=DCUN1D5 PE=1 SV=1
O14920	IKKB_HUMAN	-3.35952	0.200056	-0.470049	-0.340731	0.25517	-0.170012	0.341946	-0.225602	0.0483244	1.62829	1.56108	1.7184	4	6	4	3	1.63593	-0.413379	0.0130292	2.04931	IKKB_HUMAN Inhibitor of nuclear factor kappa-B kinase subunit beta OS=Homo sapiens GN=IKBKB PE=1 SV=1
O14777	NDC80_HUMAN	-0.414759	-1.45109	-1.24757	-1.0832	-0.117183	-0.242965	-0.305324	-0.7594	-0.326517	1.31371	1.37174	1.45187	13	11	16	13	1.3791	-0.660891	3.92029e-05	2.04	NDC80_HUMAN Kinetochore protein NDC80 homolog OS=Homo sapiens GN=NDC80 PE=1 SV=1
O75665	OFD1_HUMAN	-0.0143333	0.267564	-0.0875225	-0.524976	-2.39223	-3.58229	0.476579	0.00857212	0.470063	1.38959	1.07496	1.79413	5	4	3	4	1.41956	-0.597619	0.0397891	2.01718	OFD1_HUMAN Oral-facial-digital syndrome 1 protein OS=Homo sapiens GN=OFD1 PE=1 SV=1
P49642	PRI1_HUMAN	-1.22615	-1.36925	-1.15385	-1.37641	0.390999	-0.160095	-0.333414	-0.572403	-0.120543	1.49511	1.05405	1.5181	10	8	9	8	1.35575	-0.657901	0.000449261	2.01365	PRI1_HUMAN DNA primase small subunit OS=Homo sapiens GN=PRIM1 PE=1 SV=1
Q9UNI6	DUS12_HUMAN	-1.18019	-0.682078	-1.55279	-3.17551	-0.895221	-1.35472	-1.77406	-2.04842	-1.69262	0.37797	-0.0116643	0.866959	4	4	6	3	0.411088	-1.59507	0.00134498	2.00616	DUS12_HUMAN Dual specificity protein phosphatase 12 OS=Homo sapiens GN=DUSP12 PE=1 SV=1
Q9H000	MKRN2_HUMAN	-0.825337	-0.457116	-0.469506	-1.44039	0.669934	0.0920895	0.780065	0.134238	0.686189	1.92241	2.31562	1.49621	3	4	1	2	1.91141	-0.092204	0.00168793	2.00362	MKRN2_HUMAN Probable E3 ubiquitin-protein ligase makorin-2 OS=Homo sapiens GN=MKRN2 PE=1 SV=2
Q9UBP9	GULP1_HUMAN	-2.27694	-0.627478	-0.0817053	0.102623	0.0866681	-0.461158	-0.61079	-0.81884	-0.520652	1.38463	1.35346	1.52444	5	3	2	2	1.42084	-0.578696	0.000886828	1.99954	GULP1_HUMAN PTB domain-containing engulfment adapter protein 1 OS=Homo sapiens GN=GULP1 PE=1 SV=1
Q2TAL8	QRIC1_HUMAN	-1.97257	-0.28818	-0.467531	-1.59427	-0.423412	-0.446709	-0.457628	-0.586974	-0.493382	1.15502	1.05883	1.53758	5	7	5	8	1.25048	-0.74785	0.000273901	1.99833	QRIC1_HUMAN Glutamine-rich protein 1 OS=Homo sapiens GN=QRICH1 PE=1 SV=1
Q86YR5	GPSM1_HUMAN	-1.23077	-0.703897	0.91295	-1.11236	-0.154864	-0.327039	-1.01329	-1.14225	-0.997631	1.03091	1.10223	1.93598	3	5	2	3	1.35637	-0.641016	0.00106785	1.99739	GPSM1_HUMAN G-protein-signaling modulator 1 OS=Homo sapiens GN=GPSM1 PE=1 SV=2
Q9BRT8	CBWD1_HUMAN	-2.1219	-1.29219	0.933864	-1.33514	-0.0994332	-0.128873	-0.124825	-0.38122	-0.125908	1.56013	0.887451	1.96978	3	7	4	1	1.47245	-0.519513	0.0055224	1.99197	CBWD1_HUMAN COBW domain-containing protein 1 OS=Homo sapiens GN=CBWD1 PE=2 SV=1
Q7L1V2	MON1B_HUMAN	-1.06569	0.656832	0.247671	1.43018	-0.250219	0.066554	1.84847	1.8184	1.52783	2.85617	2.8177	2.3724	2	2	1	1	2.68209	0.69778	0.00922366	1.98431	MON1B_HUMAN Vacuolar fusion protein MON1 homolog B OS=Homo sapiens GN=MON1B PE=1 SV=1
O43156	TTI1_HUMAN	-0.891582	-0.285701	-0.162443	-1.82698	-0.0420816	-0.550011	-1.25476	-1.50818	-1.09784	1.00828	0.988993	1.40798	7	5	6	2	1.13509	-0.846621	0.000397879	1.98171	TTI1_HUMAN TELO2-interacting protein 1 homolog OS=Homo sapiens GN=TTI1 PE=1 SV=3
Q12979	ABR_HUMAN	-1.44513	-0.845693	-0.00661825	-1.40932	-1.211	-1.63637	-1.34337	-1.62352	-1.25733	0.70751	0.554694	1.08575	10	6	11	8	0.782653	-1.1976	8.48739e-05	1.98025	ABR_HUMAN Active breakpoint cluster region-related protein OS=Homo sapiens GN=ABR PE=2 SV=2
O00625	PIR_HUMAN	-3.48508	-2.33109	-1.08222	-3.34621	-1.84595	-1.94661	-2.32876	-2.46707	-2.23917	-0.530711	-0.374757	-0.202692	5	2	8	7	-0.369387	-2.34135	0.00120308	1.97196	PIR_HUMAN Pirin OS=Homo sapiens GN=PIR PE=1 SV=1
O60502	OGA_HUMAN	-0.516835	-1.24238	-1.18425	-0.0591291	-0.554635	-0.842866	-0.907179	-1.15782	-0.902692	1.04101	0.874745	1.54144	19	15	27	24	1.1524	-0.818643	1.40533e-05	1.97104	OGA_HUMAN Protein O-GlcNAcase OS=Homo sapiens GN=MGEA5 PE=1 SV=2
Q9BPX3	CND3_HUMAN	-1.46386	-1.03423	-0.354163	-0.694746	0.17149	-0.0884199	0.290443	-0.17044	-0.169001	1.64964	1.53859	1.55027	26	25	19	25	1.5795	-0.390326	0.000183925	1.96983	CND3_HUMAN Condensin complex subunit 3 OS=Homo sapiens GN=NCAPG PE=1 SV=1
Q9Y4R8	TELO2_HUMAN	-1.10116	-0.820471	-0.966397	-1.19857	0.175993	0.130884	-0.0334701	-0.433209	0.124319	1.40942	1.30114	1.81874	18	9	10	13	1.50977	-0.458009	0.000224998	1.96778	TELO2_HUMAN Telomere length regulation protein TEL2 homolog OS=Homo sapiens GN=TELO2 PE=1 SV=2
P50748	KNTC1_HUMAN	-0.886717	-1.13685	-0.361448	-2.85464	-0.447766	-0.730833	-0.904851	-1.18229	-0.940443	1.07272	0.825611	0.845988	19	16	18	12	0.914771	-1.04954	0.00117165	1.96431	KNTC1_HUMAN Kinetochore-associated protein 1 OS=Homo sapiens GN=KNTC1 PE=1 SV=1
Q9P287	BCCIP_HUMAN	-2.12911	-2.13346	-2.20652	-3.94289	-0.618599	-0.479466	-1.45178	-1.75339	-1.34036	0.241927	0.0160309	0.250899	7	5	7	8	0.169619	-1.78395	0.00979613	1.95357	BCCIP_HUMAN BRCA2 and CDKN1A-interacting protein OS=Homo sapiens GN=BCCIP PE=1 SV=1
P27707	DCK_HUMAN	-2.89901	-0.881683	0.475897	0.571612	-0.0148025	-0.247572	0.0407236	-0.396802	0.08715	1.49591	1.40724	1.86643	2	7	6	5	1.58986	-0.362721	0.0111551	1.95258	DCK_HUMAN Deoxycytidine kinase OS=Homo sapiens GN=DCK PE=1 SV=1
Q86V21	AACS_HUMAN	-2.50828	-0.473852	1.88112	-1.04043	-0.0326889	-0.753571	-0.58443	-0.754186	-0.533652	1.16591	1.1369	1.93667	10	6	7	12	1.41316	-0.53333	0.0182955	1.94649	AACS_HUMAN Acetoacetyl-CoA synthetase OS=Homo sapiens GN=AACS PE=1 SV=1
P09497	CLCB_HUMAN	-3.48329	1.21491	-1.25627	0.295639	-0.830121	-0.173443	0.145692	0.172638	-0.385519	1.86542	1.45652	1.07688	8	2	5	6	1.46628	-0.477752	0.035707	1.94403	CLCB_HUMAN Clathrin light chain B OS=Homo sapiens GN=CLTB PE=1 SV=1
Q15003	CND2_HUMAN	-0.504053	-0.712381	0.563614	-0.56252	-0.195607	-0.325027	-0.383839	-0.621531	-0.449525	1.41243	1.20417	2.11962	16	13	18	14	1.57874	-0.354541	2.79221e-05	1.93328	CND2_HUMAN Condensin complex subunit 2 OS=Homo sapiens GN=NCAPH PE=1 SV=3
Q14790	CASP8_HUMAN	-1.80467	-0.933917	0.765281	-1.32993	-0.289507	-0.888862	-0.98212	-0.923757	-0.347068	1.02803	1.03933	1.48479	5	11	7	7	1.18405	-0.748284	0.00139118	1.93234	CASP8_HUMAN Caspase-8 OS=Homo sapiens GN=CASP8 PE=1 SV=1
Q04323	UBXN1_HUMAN	-2.85066	-1.06046	-2.78066	-1.4363	-0.610253	-0.805132	-1.05348	-0.954925	-0.92193	0.223322	0.398199	1.01081	8	10	10	12	0.544112	-1.38598	0.00384547	1.93009	UBXN1_HUMAN UBX domain-containing protein 1 OS=Homo sapiens GN=UBXN1 PE=1 SV=2
O95817	BAG3_HUMAN	-1.85796	0.140484	0.0791848	0.892175	-0.401156	-0.477685	0.18871	-0.375346	-0.808539	1.88991	1.73784	1.28827	26	13	23	25	1.63867	-0.291125	0.00206308	1.9298	BAG3_HUMAN BAG family molecular chaperone regulator 3 OS=Homo sapiens GN=BAG3 PE=1 SV=3
Q9UKW4	VAV3_HUMAN	-0.439347	-0.245834	-0.48906	-0.876043	-0.22875	-0.208549	-0.468426	-0.212145	-0.616723	1.66441	1.37875	1.47805	4	7	6	2	1.50707	-0.420542	8.84075e-08	1.92761	VAV3_HUMAN Guanine nucleotide exchange factor VAV3 OS=Homo sapiens GN=VAV3 PE=1 SV=1
Q96F86	EDC3_HUMAN	-2.3046	-1.29637	-1.32747	0.0635332	0.485038	-0.00432752	0.373812	0.202921	0.259397	1.72169	1.37194	1.50096	10	6	6	12	1.53153	-0.394229	0.00873681	1.92576	EDC3_HUMAN Enhancer of mRNA-decapping protein 3 OS=Homo sapiens GN=EDC3 PE=1 SV=1
P51812	KS6A3_HUMAN	-1.4811	0.00795823	0.228453	-0.895831	0.304759	0.109763	-0.645342	-0.716364	-0.34163	1.44575	1.23974	1.94475	13	6	9	16	1.54341	-0.381037	0.000438687	1.92445	KS6A3_HUMAN Ribosomal protein S6 kinase alpha-3 OS=Homo sapiens GN=RPS6KA3 PE=1 SV=1
Q9H5I5	PIEZ2_HUMAN	-0.197855	-0.0613999	-0.918061	0.168744	0.214102	0.292268	1.26392	0.713592	0.63051	2.51449	1.92807	2.01534	1	2	1	1	2.15263	0.233981	0.000504628	1.91865	PIEZ2_HUMAN Piezo-type mechanosensitive ion channel component 2 OS=Homo sapiens GN=PIEZO2 PE=1 SV=2
Q99622	C10_HUMAN	-1.42675	0.240281	-2.20109	-0.187252	0.403217	-0.202482	-0.386251	-0.401723	-0.167297	1.36286	1.64579	1.28784	4	5	2	3	1.43216	-0.481039	0.00311821	1.9132	C10_HUMAN Protein C10 OS=Homo sapiens GN=C12orf57 PE=1 SV=1
Q96KB5	TOPK_HUMAN	0.189141	-0.522372	-0.932723	0.194574	-0.449455	-0.685623	-1.50226	-2.02426	-1.58192	0.882435	0.668494	1.72531	8	8	6	8	1.09208	-0.812766	0.00306161	1.90485	TOPK_HUMAN Lymphokine-activated killer T-cell-originated protein kinase OS=Homo sapiens GN=PBK PE=1 SV=3
O95999	BCL10_HUMAN	-3.60552	-2.43567	-0.470469	-1.52496	-0.97052	-1.07741	-0.868199	-1.003	-0.389664	0.270275	0.296557	1.01864	4	1	2	2	0.528492	-1.37171	0.0129404	1.9002	BCL10_HUMAN B-cell lymphoma/leukemia 10 OS=Homo sapiens GN=BCL10 PE=1 SV=1
P24941	CDK2_HUMAN	-0.567219	-1.08241	-1.74048	-1.63686	-0.360707	-0.613233	-1.00321	-0.964262	-1.15666	0.7793	0.549922	1.32017	11	11	8	11	0.883131	-1.01389	8.96361e-05	1.89702	CDK2_HUMAN Cyclin-dependent kinase 2 OS=Homo sapiens GN=CDK2 PE=1 SV=2
Q07343	PDE4B_HUMAN	-1.81693	-1.56787	0.805023	-2.71286	-1.1203	-0.853911	-1.19318	-1.42438	-1.02175	0.562445	0.334003	1.14786	5	5	6	6	0.681434	-1.2118	0.00794924	1.89323	PDE4B_HUMAN cAMP-specific 3',5'-cyclic phosphodiesterase 4B OS=Homo sapiens GN=PDE4B PE=1 SV=1
R4GNB2	R4GNB2_HUMAN	-0.429473	0.707115	0.110711	0.6231	-0.338244	-1.13751	-0.302579	-0.617023	-0.55779	1.80814	1.51748	1.70614	3	3	2	2	1.67726	-0.215744	0.000361956	1.893	R4GNB2_HUMAN DENN domain-containing protein 4C OS=Homo sapiens GN=DENND4C PE=1 SV=1
Q9Y6Y0	NS1BP_HUMAN	0.388841	-0.00337307	-0.848077	-1.41773	-0.261354	-0.550789	-0.861022	-0.95846	-0.99702	1.63555	1.1058	1.09771	2	4	3	5	1.27969	-0.61211	0.000286046	1.8918	NS1BP_HUMAN Influenza virus NS1A-binding protein OS=Homo sapiens GN=IVNS1ABP PE=1 SV=3
Q15126	PMVK_HUMAN	-3.04275	-0.340765	-0.673664	-0.99184	0.596286	-0.0279101	-0.356345	-0.971036	-0.665028	0.966621	0.877123	1.66584	8	4	5	6	1.16986	-0.719228	0.0114024	1.88909	PMVK_HUMAN Phosphomevalonate kinase OS=Homo sapiens GN=PMVK PE=1 SV=3
Q7Z4H7	HAUS6_HUMAN	-0.879029	0.356036	-2.20429	-0.411874	0.16881	-0.109563	-0.458352	-0.259944	-0.273386	1.37582	1.18094	1.75209	8	6	8	6	1.43628	-0.452399	0.00196222	1.88868	HAUS6_HUMAN HAUS augmin-like complex subunit 6 OS=Homo sapiens GN=HAUS6 PE=1 SV=2
Q02241	KIF23_HUMAN	-0.684974	-0.968509	0.279688	-1.00148	1.18851	0.88176	1.40815	0.911157	0.583522	2.79389	2.06727	1.66413	54	23	32	31	2.1751	0.288648	0.00922466	1.88645	KIF23_HUMAN Kinesin-like protein KIF23 OS=Homo sapiens GN=KIF23 PE=1 SV=3
Q6XZF7	DNMBP_HUMAN	-2.11585	-0.0482509	-1.02007	-0.446694	-0.255273	-0.713325	-0.0491477	-0.43197	-0.193468	1.64876	1.16533	1.07275	7	14	8	4	1.29561	-0.586005	0.000853428	1.88162	DNMBP_HUMAN Dynamin-binding protein OS=Homo sapiens GN=DNMBP PE=1 SV=1
Q6P2E9	EDC4_HUMAN	-2.05815	-0.467604	-0.758268	-0.111627	-0.0376945	-0.125822	0.119423	0.000249116	0.167233	1.65733	1.47884	1.39833	36	21	20	25	1.5115	-0.363584	0.0011846	1.87509	EDC4_HUMAN Enhancer of mRNA-decapping protein 4 OS=Homo sapiens GN=EDC4 PE=1 SV=1
Q14432	PDE3A_HUMAN	-1.52783	-0.331591	0.695019	-0.0299124	-0.221247	-0.239744	-0.32272	-0.301587	-0.151154	1.4734	1.40166	1.93978	14	16	13	16	1.60495	-0.270085	0.000324968	1.87503	PDE3A_HUMAN cGMP-inhibited 3',5'-cyclic phosphodiesterase A OS=Homo sapiens GN=PDE3A PE=1 SV=3
Q92538	GBF1_HUMAN	-0.301801	-1.19082	-2.01645	-1.70106	-0.192035	-0.601929	-1.18826	-1.37782	-0.904299	0.722275	0.616758	1.11682	26	15	27	28	0.818616	-1.05272	0.000543261	1.87134	GBF1_HUMAN Golgi-specific brefeldin A-resistance guanine nucleotide exchange factor 1 OS=Homo sapiens GN=GBF1 PE=1 SV=2
Q9H063	MAF1_HUMAN	-2.17293	0.356804	-1.713	-0.575915	-0.32069	-0.546326	-0.888405	-0.967315	-1.41843	0.761947	0.53839	1.55668	1	2	1	1	0.952338	-0.916244	0.00315605	1.86858	MAF1_HUMAN Repressor of RNA polymerase III transcription MAF1 homolog OS=Homo sapiens GN=MAF1 PE=1 SV=2
Q96LD4	TRI47_HUMAN	-1.0426	0.213433	0.820805	0.911851	-0.0465234	-0.0165152	0.439749	-0.319041	0.21466	2.05498	1.74247	2.19846	15	12	13	14	1.99863	0.130647	0.000418698	1.86799	TRI47_HUMAN Tripartite motif-containing protein 47 OS=Homo sapiens GN=TRIM47 PE=1 SV=2
Q86TC9	MYPN_HUMAN	-1.15928	-0.402441	0.714145	-0.706786	-0.414907	-0.216471	0.313814	-0.00527331	-0.318324	2.04277	2.05165	0.765166	6	7	6	5	1.61986	-0.243947	0.000804977	1.86381	MYPN_HUMAN Myopalladin OS=Homo sapiens GN=MYPN PE=1 SV=2
Q9HAV4	XPO5_HUMAN	-0.72386	-1.93576	-1.33723	-2.30846	-0.677864	-0.880134	-0.856367	-1.16571	-1.18615	0.809441	0.642497	0.445013	17	18	18	19	0.632317	-1.23017	0.000257193	1.86249	XPO5_HUMAN Exportin-5 OS=Homo sapiens GN=XPO5 PE=1 SV=1
Q08499	PDE4D_HUMAN	-1.19731	-0.559276	1.83098	-0.736126	-0.772744	-0.890413	-0.84135	-1.1994	-1.00105	1.21295	1.05152	1.53213	11	2	13	11	1.26553	-0.5963	0.00781719	1.86183	PDE4D_HUMAN cAMP-specific 3',5'-cyclic phosphodiesterase 4D OS=Homo sapiens GN=PDE4D PE=1 SV=2
Q9Y6B7	AP4B1_HUMAN	-0.293316	-1.22172	-1.73874	-0.63756	-0.155012	-0.433401	0.201907	0.486663	0.5831	1.19989	1.29114	2.01905	3	4	3	1	1.50336	-0.356453	0.00292557	1.85981	AP4B1_HUMAN AP-4 complex subunit beta-1 OS=Homo sapiens GN=AP4B1 PE=1 SV=2
Q9Y3Z3	SAMH1_HUMAN	-3.06195	-1.90065	0.463221	-0.540034	0.827621	-0.00893681	-0.177187	-0.522813	-0.375775	1.02251	1.22532	1.55381	22	17	13	11	1.26721	-0.588501	0.0274771	1.85571	SAMH1_HUMAN Deoxynucleoside triphosphate triphosphohydrolase SAMHD1 OS=Homo sapiens GN=SAMHD1 PE=1 SV=2
M0R3A8	M0R3A8_HUMAN	-0.398907	0.236941	-0.0350286	-0.276479	-0.112114	-1.42903	0.333717	-0.915964	0.0279009	1.66854	1.468	1.5702	1	1	3	1	1.56892	-0.28544	0.000272972	1.85436	M0R3A8_HUMAN PIH1 domain-containing protein 1 (Fragment) OS=Homo sapiens GN=PIH1D1 PE=1 SV=1
P60842	IF4A1_HUMAN	-2.55869	-2.0719	-2.24722	-1.60179	-0.146609	-0.368396	-0.502652	-0.780557	-0.600662	0.481062	0.327642	1.12283	22	19	19	19	0.643846	-1.20872	0.00786083	1.85257	IF4A1_HUMAN Eukaryotic initiation factor 4A-I OS=Homo sapiens GN=EIF4A1 PE=1 SV=1
Q9NVI1	FANCI_HUMAN	-1.83021	-1.77482	-1.8608	-2.04573	0.348293	0.0361457	-0.331749	-0.481213	-0.0473587	0.836907	0.774051	1.2644	29	25	27	25	0.958453	-0.887494	0.0101209	1.84595	FANCI_HUMAN Fanconi anemia group I protein OS=Homo sapiens GN=FANCI PE=1 SV=4
P30085	KCY_HUMAN	-1.25777	-2.37612	-2.98644	-3.24156	-0.881962	-1.58199	-1.94645	-2.13712	-1.4996	-0.789497	-0.363423	0.711903	6	9	7	4	-0.147006	-1.98989	0.00536289	1.84289	KCY_HUMAN UMP-CMP kinase OS=Homo sapiens GN=CMPK1 PE=1 SV=3
Q9UBS8	RNF14_HUMAN	0.431305	1.03346	-1.36908	-0.464887	0.155358	0.188803	-0.309509	-0.614418	-0.155264	1.11768	1.51529	2.50206	1	5	3	1	1.71168	-0.122693	0.00260585	1.83437	RNF14_HUMAN E3 ubiquitin-protein ligase RNF14 OS=Homo sapiens GN=RNF14 PE=1 SV=1
O95219	SNX4_HUMAN	-0.884949	-0.762927	0.196967	-0.785915	-0.142841	-0.311687	-1.54972	-1.41814	-1.16062	1.13367	0.783616	1.30814	5	5	5	4	1.07514	-0.757759	0.000445118	1.8329	SNX4_HUMAN Sorting nexin-4 OS=Homo sapiens GN=SNX4 PE=1 SV=1
P08243	ASNS_HUMAN	-1.63016	-2.35477	0.952262	0.10008	0.190589	-0.0439428	0.04045	-0.439417	-0.940517	2.04198	1.37679	0.701311	18	15	14	13	1.37336	-0.458381	0.0170242	1.83174	ASNS_HUMAN Asparagine synthetase [glutamine-hydrolyzing] OS=Homo sapiens GN=ASNS PE=1 SV=4
Q9NZT2	OGFR_HUMAN	-1.69507	-0.541351	-0.0618801	-0.490856	0.402478	-0.135609	-0.191726	-0.457319	-0.0778555	1.40274	1.12178	1.87881	11	6	14	13	1.46778	-0.361021	0.000507157	1.8288	OGFR_HUMAN Opioid growth factor receptor OS=Homo sapiens GN=OGFR PE=1 SV=3
Q00610	CLH1_HUMAN	-0.571405	-0.424196	-1.15808	-1.31155	0.00592262	0.195784	0.409582	0.721893	0.335754	2.13635	1.40565	1.32359	90	76	71	76	1.62186	-0.199588	0.0021588	1.82145	CLH1_HUMAN Clathrin heavy chain 1 OS=Homo sapiens GN=CLTC PE=1 SV=5
O14717	TRDMT_HUMAN	-0.855435	-1.27099	-0.516993	-0.255019	-0.280758	-0.293213	-0.101416	-0.492719	-0.238133	1.48547	1.1236	1.41447	2	2	1	1	1.34118	-0.478297	1.19905e-05	1.81948	TRDMT_HUMAN tRNA (cytosine(38)-C(5))-methyltransferase OS=Homo sapiens GN=TRDMT1 PE=1 SV=1
Q86Y56	DAAF5_HUMAN	-1.72959	-1.53607	-0.154616	-2.50183	-0.370572	-0.688247	-0.819386	-1.25845	-1.02366	0.419013	0.458527	1.21741	19	18	16	11	0.698318	-1.12027	0.00253084	1.81859	DAAF5_HUMAN Dynein assembly factor 5, axonemal OS=Homo sapiens GN=DNAAF5 PE=1 SV=4
Q68CZ6	HAUS3_HUMAN	-1.84711	-1.23095	0.171506	-0.430749	-0.455625	-0.232911	0.384104	0.0492988	-0.0862741	1.72372	1.21829	1.28086	6	7	2	3	1.40763	-0.408746	0.00183054	1.81637	HAUS3_HUMAN HAUS augmin-like complex subunit 3 OS=Homo sapiens GN=HAUS3 PE=1 SV=1
Q9H7C4	SYNCI_HUMAN	-1.94328	-0.412206	-0.509512	0.192115	0.114717	-0.306813	-0.104337	-0.498056	0.121826	1.10879	0.965571	2.25428	5	3	7	9	1.44288	-0.371727	0.00209801	1.81461	SYNCI_HUMAN Syncoilin OS=Homo sapiens GN=SYNC PE=1 SV=3
Q6NXR4	TTI2_HUMAN	-1.47667	-1.57438	-0.555392	-0.877774	0.79579	0.157512	-1.19641	-1.16384	-1.16318	0.704379	0.849239	1.5258	4	5	1	3	1.02647	-0.783816	0.00411839	1.81029	TTI2_HUMAN TELO2-interacting protein 2 OS=Homo sapiens GN=TTI2 PE=1 SV=1
Q9BZV1	UBXN6_HUMAN	-1.65445	0.27642	-0.896744	-0.86884	0.463752	-0.25665	-0.5321	-1.27404	-0.314022	1.28278	0.884027	1.56228	6	5	4	3	1.24303	-0.561852	0.00167814	1.80488	UBXN6_HUMAN UBX domain-containing protein 6 OS=Homo sapiens GN=UBXN6 PE=1 SV=1
Q9Y371	SHLB1_HUMAN	-1.39409	-0.690383	-0.0896468	-1.73537	-1.00526	-1.41054	-1.31378	-1.45978	-1.21038	0.407797	0.330796	1.23574	9	4	9	6	0.65811	-1.14547	0.000277477	1.80358	SHLB1_HUMAN Endophilin-B1 OS=Homo sapiens GN=SH3GLB1 PE=1 SV=1
P30154	2AAB_HUMAN	-1.02635	-1.14106	-1.23882	-2.00902	-0.19067	-0.0813195	-0.239821	-0.466383	-0.0652586	1.04101	0.871388	1.34367	8	6	6	7	1.08536	-0.717632	0.00127528	1.80299	2AAB_HUMAN Serine/threonine-protein phosphatase 2A 65 kDa regulatory subunit A beta isoform OS=Homo sapiens GN=PPP2R1B PE=1 SV=3
O95905	ECD_HUMAN	-0.562045	-0.459338	-1.90984	-0.647022	-0.293675	-0.162848	-0.575671	-0.110501	-0.436516	1.30676	0.967522	1.40844	8	9	7	2	1.22758	-0.573051	0.000253285	1.80063	ECD_HUMAN Protein ecdysoneless homolog OS=Homo sapiens GN=ECD PE=1 SV=1
Q9BXW9	FACD2_HUMAN	-0.924087	-0.895717	-1.00816	-1.4443	0.22567	0.119951	0.0370111	-0.118421	0.186788	1.28407	1.21477	1.62488	14	13	15	12	1.37457	-0.424586	0.000888906	1.79916	FACD2_HUMAN Fanconi anemia group D2 protein OS=Homo sapiens GN=FANCD2 PE=1 SV=2
Q8TB52	FBX30_HUMAN	-2.16939	-0.976294	-1.1488	-0.449806	-0.0113172	-0.354966	-0.965357	-1.54661	-1.57543	0.869102	0.618795	0.833314	3	3	3	1	0.773737	-1.022	0.00133774	1.79573	FBX30_HUMAN F-box only protein 30 OS=Homo sapiens GN=FBXO30 PE=1 SV=3
Q5VTB9	RN220_HUMAN	0.229098	0.811075	0.186864	-0.891228	-0.192913	-0.0730706	-1.17766	-0.918537	-1.55744	0.87878	0.942809	2.36561	1	1	2	2	1.39573	-0.398202	0.00664958	1.79393	RN220_HUMAN E3 ubiquitin-protein ligase RNF220 OS=Homo sapiens GN=RNF220 PE=1 SV=1
P49427	UB2R1_HUMAN	-1.29906	-1.02398	-2.24898	-2.00273	-0.258332	-0.63697	-0.976475	-1.28094	-1.26632	0.627823	0.0813596	1.00344	3	2	2	2	0.570874	-1.22153	0.00104175	1.7924	UB2R1_HUMAN Ubiquitin-conjugating enzyme E2 R1 OS=Homo sapiens GN=CDC34 PE=1 SV=2
Q8TC07	TBC15_HUMAN	-0.905497	-0.576749	-0.0735743	-2.15036	-0.188236	-0.387928	-0.163986	-0.31144	-0.416527	1.41301	1.18222	1.05093	11	7	9	11	1.21538	-0.574922	0.000929849	1.79031	TBC15_HUMAN TBC1 domain family member 15 OS=Homo sapiens GN=TBC1D15 PE=1 SV=2
Q9NYZ3	GTSE1_HUMAN	-2.65712	-0.905648	0.718724	-1.41464	0.411307	0.512896	0.262643	0.0443378	0.370445	1.7476	1.48472	1.25253	7	5	3	9	1.49495	-0.295229	0.0249024	1.79018	GTSE1_HUMAN G2 and S phase-expressed protein 1 OS=Homo sapiens GN=GTSE1 PE=1 SV=3
Q15154	PCM1_HUMAN	-1.74064	-0.0988385	-0.614309	-0.0750609	0.625432	0.982538	0.613436	0.457887	1.29274	1.93904	1.74908	2.1593	29	16	20	19	1.94914	0.160353	0.00897966	1.78879	PCM1_HUMAN Pericentriolar material 1 protein OS=Homo sapiens GN=PCM1 PE=1 SV=4
O00165	HAX1_HUMAN	-0.0583153	0.245536	-0.499908	-1.19783	-0.329545	-0.53844	-0.752863	-1.22081	-1.13641	1.33862	0.951182	1.18894	4	5	4	4	1.15958	-0.609843	0.000219277	1.76943	HAX1_HUMAN HCLS1-associated protein X-1 OS=Homo sapiens GN=HAX1 PE=1 SV=2
Q12834	CDC20_HUMAN	-0.904879	-0.396568	-0.93159	-2.41977	-0.104683	-0.291036	-0.102836	0.178362	-0.684839	1.40255	1.41951	0.567754	10	3	5	7	1.12994	-0.628649	0.00446399	1.75859	CDC20_HUMAN Cell division cycle protein 20 homolog OS=Homo sapiens GN=CDC20 PE=1 SV=2
O75717	WDHD1_HUMAN	-0.959529	-1.31576	-1.53278	-2.07017	-0.48886	-0.562545	-0.566468	-0.814743	-0.635199	0.927764	0.751225	0.605925	29	15	17	21	0.761638	-0.994005	0.000307154	1.75564	WDHD1_HUMAN WD repeat and HMG-box DNA-binding protein 1 OS=Homo sapiens GN=WDHD1 PE=1 SV=1
Q9BYX2	TBD2A_HUMAN	-2.20501	-1.57768	-0.844953	-2.12128	-0.891681	-1.60101	-0.854746	-1.11979	-1.03786	0.702796	0.446674	0.0314074	12	9	8	5	0.393626	-1.36156	0.000381946	1.75518	TBD2A_HUMAN TBC1 domain family member 2A OS=Homo sapiens GN=TBC1D2 PE=1 SV=3
Q9UKD1	GMEB2_HUMAN	-1.11921	0.550848	-2.23158	-0.840959	-0.00330248	-0.0474505	1.4601	1.72673	0.890159	2.18202	1.43839	1.75687	2	2	3	1	1.79242	0.042815	0.046886	1.74961	GMEB2_HUMAN Glucocorticoid modulatory element-binding protein 2 OS=Homo sapiens GN=GMEB2 PE=1 SV=1
Q13907	IDI1_HUMAN	-2.10447	0.239095	-2.69844	0.123951	0.680603	0.220479	-0.921446	-0.364156	0.167279	0.731359	0.966904	1.99624	6	10	4	6	1.2315	-0.517456	0.0363639	1.74896	IDI1_HUMAN Isopentenyl-diphosphate Delta-isomerase 1 OS=Homo sapiens GN=IDI1 PE=1 SV=2
Q9Y6N1	COX11_HUMAN	-0.638987	0.474545	-3.61324	-0.363358	-0.645893	-0.734086	-0.135934	0.114929	0.169222	0.982472	1.35927	1.11278	2	5	1	1	1.15151	-0.596978	0.0357925	1.74848	COX11_HUMAN Cytochrome c oxidase assembly protein COX11, mitochondrial OS=Homo sapiens GN=COX11 PE=1 SV=3
Q96S55	WRIP1_HUMAN	-2.09128	0.0165901	-0.698766	0.457502	0.915567	0.717621	1.15541	0.782417	0.877484	2.16929	1.96924	1.80616	19	6	13	13	1.98156	0.236949	0.0186269	1.74462	WRIP1_HUMAN ATPase WRNIP1 OS=Homo sapiens GN=WRNIP1 PE=1 SV=2
O75925	PIAS1_HUMAN	0.208188	-0.0334427	-1.42034	-0.157282	-0.591653	-0.516399	0.410396	0.735495	1.38864	1.58677	1.86369	1.77677	3	4	2	1	1.74241	0.00262166	0.00520217	1.73979	PIAS1_HUMAN E3 SUMO-protein ligase PIAS1 OS=Homo sapiens GN=PIAS1 PE=1 SV=2
Q9BTT0	AN32E_HUMAN	-1.67972	-2.46427	-1.69888	-1.9613	0.44042	-0.245107	-0.286608	-0.427349	-0.169858	0.736816	0.221085	1.42695	8	12	10	10	0.794951	-0.94363	0.0199423	1.73858	AN32E_HUMAN Acidic leucine-rich nuclear phosphoprotein 32 family member E OS=Homo sapiens GN=ANP32E PE=1 SV=1
Q9H3H1	MOD5_HUMAN	-1.22029	-0.463147	-1.76107	-1.74381	-0.00502853	-0.437167	-1.12022	-0.882743	-0.950928	0.833731	0.777418	0.73322	6	2	2	2	0.781457	-0.953823	0.000599771	1.73528	MOD5_HUMAN tRNA dimethylallyltransferase, mitochondrial OS=Homo sapiens GN=TRIT1 PE=1 SV=1
P34949	MPI_HUMAN	-1.75095	-0.730863	-1.22278	-0.574913	0.274655	-0.482039	-0.335552	-0.30267	-0.687163	1.05708	0.932549	1.26683	8	14	8	4	1.08549	-0.645808	0.00054895	1.7313	MPI_HUMAN Mannose-6-phosphate isomerase OS=Homo sapiens GN=MPI PE=1 SV=2
Q6VY07	PACS1_HUMAN	-1.17988	-0.966067	-1.18813	-2.51218	-0.275356	-0.440923	-0.341854	-0.465161	0.235602	0.610547	0.603092	1.60098	9	10	10	5	0.938205	-0.792661	0.00637929	1.73087	PACS1_HUMAN Phosphofurin acidic cluster sorting protein 1 OS=Homo sapiens GN=PACS1 PE=1 SV=2
Q12756	KIF1A_HUMAN	0.898286	0.86262	0.233234	0.268797	-0.262947	-0.490577	-0.694421	-0.99937	-0.801678	1.46165	1.48419	1.91759	5	4	12	14	1.62114	-0.109562	0.00237234	1.73071	KIF1A_HUMAN Kinesin-like protein KIF1A OS=Homo sapiens GN=KIF1A PE=1 SV=2
P58107	EPIPL_HUMAN	-2.06207	1.44997	-1.2376	-0.57379	0.352736	0.875595	0.19958	0.549136	0.819907	1.42802	1.85135	2.0363	170	91	108	127	1.77189	0.0414973	0.0284893	1.73039	EPIPL_HUMAN Epiplakin OS=Homo sapiens GN=EPPK1 PE=1 SV=2
P42771	CDN2A_HUMAN	-1.16391	-0.242706	0.0446395	-1.4617	0.421447	0.268023	-0.822209	-0.539523	-0.306345	1.11387	1.03518	1.76768	8	4	4	4	1.30558	-0.422476	0.00148389	1.72805	CDN2A_HUMAN Cyclin-dependent kinase inhibitor 2A OS=Homo sapiens GN=CDKN2A PE=1 SV=2
Q9NS91	RAD18_HUMAN	-1.65064	-0.851645	0.727836	-0.957713	0.842348	0.875735	0.887702	0.444867	0.522252	1.91649	1.78128	1.7519	12	6	7	6	1.81656	0.0934164	0.0140227	1.72314	RAD18_HUMAN E3 ubiquitin-protein ligase RAD18 OS=Homo sapiens GN=RAD18 PE=1 SV=2
Q96IF1	AJUBA_HUMAN	-2.38861	-0.0951369	-1.13956	-2.97484	0.623149	0.505812	-0.0185049	-0.236532	0.165456	1.16825	0.958602	1.17676	1	3	4	3	1.1012	-0.61764	0.0485794	1.71884	AJUBA_HUMAN LIM domain-containing protein ajuba OS=Homo sapiens GN=AJUBA PE=1 SV=1
O95263	PDE8B_HUMAN	-1.08848	-0.441364	1.59758	-1.25835	0.365129	0.448081	-0.196744	-0.616474	-0.0463079	1.65151	1.29543	1.78644	12	12	7	3	1.57779	-0.137437	0.00857548	1.71523	PDE8B_HUMAN High affinity cAMP-specific and IBMX-insensitive 3',5'-cyclic phosphodiesterase 8B OS=Homo sapiens GN=PDE8B PE=1 SV=2
A6NHQ2	FBLL1_HUMAN	-0.0925376	0.290891	2.01973	-0.97696	1.70803	2.02804	1.66477	0.893869	0.690533	2.51929	3.15375	2.20607	3	2	1	2	2.62637	0.91404	0.0228985	1.71233	FBLL1_HUMAN rRNA/tRNA 2'-O-methyltransferase fibrillarin-like protein 1 OS=Homo sapiens GN=FBLL1 PE=3 SV=2
Q7LBC6	KDM3B_HUMAN	-1.22353	-0.607252	-1.51896	-0.848829	-0.0327347	-0.476732	-0.732084	-1.19264	-0.589467	0.787785	0.557436	1.36839	17	16	13	14	0.904536	-0.80247	0.000184566	1.70701	KDM3B_HUMAN Lysine-specific demethylase 3B OS=Homo sapiens GN=KDM3B PE=1 SV=2
Q9Y605	MOFA1_HUMAN	-0.134963	-1.49486	-0.00314742	-1.00119	-0.453994	-0.696711	-0.70766	-0.874527	-0.982734	1.05165	0.69353	1.23752	2	1	3	3	0.994233	-0.705532	0.000145827	1.69977	MOFA1_HUMAN MORF4 family-associated protein 1 OS=Homo sapiens GN=MRFAP1 PE=1 SV=1
O94927	HAUS5_HUMAN	-1.03028	0.209743	-0.431423	-0.92537	0.174753	-0.141403	0.481674	-0.12236	0.00434693	1.57007	1.59986	1.33388	6	3	7	2	1.50127	-0.197813	0.000256399	1.69909	HAUS5_HUMAN HAUS augmin-like complex subunit 5 OS=Homo sapiens GN=HAUS5 PE=1 SV=2
O95551	TYDP2_HUMAN	-1.75065	-1.25646	-0.441637	0.277899	-0.254212	-0.0685292	0.0156499	0.00821407	-0.0683842	1.48636	1.18354	1.23856	5	4	6	5	1.30282	-0.393124	0.00179982	1.69594	TYDP2_HUMAN Tyrosyl-DNA phosphodiesterase 2 OS=Homo sapiens GN=TDP2 PE=1 SV=1
O75534	CSDE1_HUMAN	-0.659807	-0.566952	-0.675175	-2.17827	0.194017	0.257977	0.163586	0.192722	0.291302	1.30196	1.45344	1.32259	39	25	30	37	1.35933	-0.331178	0.00568765	1.69051	CSDE1_HUMAN Cold shock domain-containing protein E1 OS=Homo sapiens GN=CSDE1 PE=1 SV=2
A6NDU8	CE051_HUMAN	-1.72843	-1.87494	0.215077	-1.19227	0.193528	-0.121963	0.0547142	-0.201607	-0.329426	0.970362	1.29834	1.14054	4	5	7	4	1.13641	-0.553925	0.00644888	1.69034	CE051_HUMAN UPF0600 protein C5orf51 OS=Homo sapiens GN=C5orf51 PE=1 SV=1
Q9BZD4	NUF2_HUMAN	-0.771052	-0.412818	0.702999	-0.697141	-0.257473	-0.379026	-0.21719	-0.810497	-0.565218	1.20459	1.32569	1.4009	12	7	10	10	1.31039	-0.378602	0.000111234	1.689	NUF2_HUMAN Kinetochore protein Nuf2 OS=Homo sapiens GN=NUF2 PE=1 SV=2
Q9H4L7	SMRCD_HUMAN	-0.0592048	-0.912876	-2.63213	-1.60779	0.57464	0.18924	0.172457	0.00295393	0.561782	1.24127	1.04357	1.52881	4	9	9	8	1.27122	-0.412326	0.0278591	1.68354	SMRCD_HUMAN SWI/SNF-related matrix-associated actin-dependent regulator of chromatin subfamily A containing DEAD/H box 1 OS=Homo sapiens GN=SMARCAD1 PE=1 SV=2
P09914	IFIT1_HUMAN	-2.93081	-1.83761	-0.350156	-2.22622	0.0195683	-0.247971	0.13521	-0.0970309	0.204098	0.893512	0.587142	1.12342	9	9	7	8	0.868024	-0.814548	0.039342	1.68257	IFIT1_HUMAN Interferon-induced protein with tetratricopeptide repeats 1 OS=Homo sapiens GN=IFIT1 PE=1 SV=2
Q9H3U1	UN45A_HUMAN	-0.736471	-1.74755	-1.15434	-4.09547	-0.435911	-0.75112	-1.0178	-1.2605	-1.27921	0.156814	0.353233	0.3758	39	20	24	27	0.295282	-1.38649	0.026687	1.68177	UN45A_HUMAN Protein unc-45 homolog A OS=Homo sapiens GN=UNC45A PE=1 SV=1
Q14181	DPOA2_HUMAN	-1.81775	-0.0242882	0.101889	-1.17265	0.181196	0.183967	-0.0634178	-0.677352	-0.247142	1.26748	1.10244	1.48972	7	8	11	9	1.28655	-0.392838	0.00252122	1.67939	DPOA2_HUMAN DNA polymerase alpha subunit B OS=Homo sapiens GN=POLA2 PE=1 SV=2
Q5TDH0	DDI2_HUMAN	-1.24381	-1.30704	-0.361822	-0.218017	-1.73858	-1.79365	-1.3535	-1.58601	-1.6249	0.237994	0.379732	0.67213	4	4	5	5	0.429952	-1.24748	0.000729067	1.67743	DDI2_HUMAN Protein DDI1 homolog 2 OS=Homo sapiens GN=DDI2 PE=1 SV=1
Q9P215	POGK_HUMAN	-1.08529	0.625462	-1.64215	-0.258333	0.17974	0.117131	0.0884317	-0.450285	0.164611	1.24802	1.51254	1.51663	1	2	4	1	1.42573	-0.251188	0.0028183	1.67692	POGK_HUMAN Pogo transposable element with KRAB domain OS=Homo sapiens GN=POGK PE=1 SV=2
Q13310	PABP4_HUMAN	-1.76953	0.134643	-0.0808749	0.51253	1.60223	1.3885	1.40782	1.19997	1.17693	2.35673	2.34468	2.18648	34	21	16	19	2.29597	0.619135	0.0260515	1.67683	PABP4_HUMAN Polyadenylate-binding protein 4 OS=Homo sapiens GN=PABPC4 PE=1 SV=1
O76071	CIAO1_HUMAN	-0.634752	0.281204	0.457816	-1.63	-0.2517	-0.508859	0.281149	0.0897944	0.0804294	1.85755	1.41928	1.11538	4	6	5	3	1.46407	-0.20388	0.002042	1.66795	CIAO1_HUMAN Probable cytosolic iron-sulfur protein assembly protein CIAO1 OS=Homo sapiens GN=CIAO1 PE=1 SV=1
P25325	THTM_HUMAN	-3.78349	-1.02488	-1.86433	-2.00105	0.0089512	-0.865366	-0.982042	-0.880729	-0.865804	0.302499	0.11539	0.497074	8	6	5	7	0.304988	-1.36208	0.0278384	1.66707	THTM_HUMAN 3-mercaptopyruvate sulfurtransferase OS=Homo sapiens GN=MPST PE=1 SV=3
Q8WWH5	TRUB1_HUMAN	-1.8748	-1.00061	-1.41398	-0.498293	-0.747295	-0.961943	-0.567122	-0.727258	-0.85828	0.348771	0.618038	1.15037	3	2	6	5	0.705725	-0.961065	0.000171682	1.66679	TRUB1_HUMAN Probable tRNA pseudouridine synthase 1 OS=Homo sapiens GN=TRUB1 PE=1 SV=1
A6NED2	RCCD1_HUMAN	-0.832442	-0.325162	-0.256995	-0.937065	-0.248658	-0.368749	-0.468472	-0.360543	-0.162871	0.87966	0.831326	1.94325	3	4	5	2	1.21808	-0.440106	5.12859e-05	1.65819	RCCD1_HUMAN RCC1 domain-containing protein 1 OS=Homo sapiens GN=RCCD1 PE=1 SV=1
Q9H993	ARMT1_HUMAN	0.675744	-1.34589	-0.792724	-1.27519	-1.46864	-2.00784	-2.23826	-1.72155	-1.93709	0.0725031	-0.322687	1.17196	8	7	5	5	0.307259	-1.34572	0.0159836	1.65297	ARMT1_HUMAN Protein-glutamate O-methyltransferase OS=Homo sapiens GN=ARMT1 PE=1 SV=1
Q13418	ILK_HUMAN	-1.83314	-1.48065	-0.501666	-1.55314	0.371954	0.0815526	0.100539	0.0680815	0.0122182	0.950097	1.15186	1.24917	20	10	11	16	1.11704	-0.526029	0.00949524	1.64307	ILK_HUMAN Integrin-linked protein kinase OS=Homo sapiens GN=ILK PE=1 SV=2
O00213	APBB1_HUMAN	-1.11049	0.432005	-0.0974471	-1.2876	0.0411769	-0.994375	-0.039302	0.226728	0.351271	1.31664	1.02449	1.74953	1	3	1	1	1.36355	-0.275336	0.00265099	1.63889	APBB1_HUMAN Amyloid beta A4 precursor protein-binding family B member 1 OS=Homo sapiens GN=APBB1 PE=1 SV=2
O43617	TPPC3_HUMAN	-0.867525	-1.84231	-0.354271	-2.93683	-0.655969	-0.565437	-0.785491	-0.367033	-0.731538	0.528731	0.550568	0.796863	5	2	4	5	0.625387	-1.01182	0.00895089	1.63721	TPPC3_HUMAN Trafficking protein particle complex subunit 3 OS=Homo sapiens GN=TRAPPC3 PE=1 SV=1
Q86TG7	PEG10_HUMAN	-1.27842	-0.573759	-1.12431	-1.92404	0.62636	0.488242	0.0321626	-0.136859	0.551468	0.850499	1.34351	1.60241	10	9	8	11	1.26547	-0.371017	0.0146033	1.63649	PEG10_HUMAN Retrotransposon-derived protein PEG10 OS=Homo sapiens GN=PEG10 PE=1 SV=2
Q8IX04	UEVLD_HUMAN	-0.789313	-1.31849	0.000133682	-1.15533	-0.470778	-0.811793	-2.04103	-1.62537	-2.26886	0.205707	0.289908	0.914247	3	3	2	2	0.469954	-1.16454	0.00481181	1.63449	UEVLD_HUMAN Ubiquitin-conjugating enzyme E2 variant 3 OS=Homo sapiens GN=UEVLD PE=1 SV=2
P31749	AKT1_HUMAN	-1.74176	0.236654	1.24888	-0.417313	0.170107	-0.220103	0.183491	-0.0723669	0.173328	1.21169	1.60169	1.93881	6	4	7	4	1.58406	-0.0487869	0.00686053	1.63285	AKT1_HUMAN RAC-alpha serine/threonine-protein kinase OS=Homo sapiens GN=AKT1 PE=1 SV=2
P28715	ERCC5_HUMAN	-1.38107	-0.421859	-1.92041	-0.561357	0.2646	0.33942	0.552591	0.663961	0.490939	1.7101	0.86552	1.6621	4	5	4	1	1.41257	-0.219243	0.0166942	1.63182	ERCC5_HUMAN DNA repair protein complementing XP-G cells OS=Homo sapiens GN=ERCC5 PE=1 SV=3
O00762	UBE2C_HUMAN	-2.76768	-2.21153	-0.661688	-1.16994	-1.21365	-1.41394	-1.58162	-1.83151	-1.62629	0.148237	-0.109007	0.0257324	4	4	5	6	0.0216541	-1.60865	0.00131265	1.6303	UBE2C_HUMAN Ubiquitin-conjugating enzyme E2 C OS=Homo sapiens GN=UBE2C PE=1 SV=1
Q15025	TNIP1_HUMAN	-3.10094	-0.582083	-0.56313	-2.05056	-0.415269	-0.348366	-0.0201282	-0.794428	-0.526097	0.858173	0.535159	0.697128	7	6	4	1	0.69682	-0.933445	0.0203658	1.63026	TNIP1_HUMAN TNFAIP3-interacting protein 1 OS=Homo sapiens GN=TNIP1 PE=1 SV=2
O60921	HUS1_HUMAN	-1.63863	-0.820435	-3.41032	-0.895877	0.0317504	0.144058	0.0829081	-0.173845	0.220915	0.603388	1.14899	0.979152	4	5	1	1	0.91051	-0.717719	0.0453514	1.62823	HUS1_HUMAN Checkpoint protein HUS1 OS=Homo sapiens GN=HUS1 PE=1 SV=1
Q9HB19	PKHA2_HUMAN	-1.9512	0.390407	1.28832	0.0432643	0.404331	0.179922	-0.0757414	-0.256975	0.24639	1.55563	1.30606	2.10393	11	4	10	16	1.65521	0.029857	0.0116844	1.62535	PKHA2_HUMAN Pleckstrin homology domain-containing family A member 2 OS=Homo sapiens GN=PLEKHA2 PE=1 SV=2
Q96RE7	NACC1_HUMAN	-0.849064	-0.656406	0.603341	-1.15866	0.213815	-0.248885	-0.364324	-0.970847	-0.207904	1.17735	1.04953	1.43366	4	8	7	6	1.22018	-0.404326	0.000843436	1.6245	NACC1_HUMAN Nucleus accumbens-associated protein 1 OS=Homo sapiens GN=NACC1 PE=1 SV=1
Q03013	GSTM4_HUMAN	-0.795626	-0.175137	-0.458195	-0.183804	0.935594	0.274596	-0.0465573	-0.058241	0.66008	1.38672	1.43593	2.08298	4	8	5	3	1.63521	0.0169675	0.000766758	1.61824	GSTM4_HUMAN Glutathione S-transferase Mu 4 OS=Homo sapiens GN=GSTM4 PE=1 SV=3
P28340	DPOD1_HUMAN	-1.58615	-0.80602	-0.381716	-0.331564	0.432556	0.0293458	0.0623922	-0.117519	-0.250386	1.45456	0.895676	1.52126	36	28	28	25	1.2905	-0.327674	0.00121249	1.61817	DPOD1_HUMAN DNA polymerase delta catalytic subunit OS=Homo sapiens GN=POLD1 PE=1 SV=2
O43683	BUB1_HUMAN	-1.38073	-0.862944	0.0101079	2.80122	0.117927	0.179891	-0.245149	-0.653221	-0.298613	1.76335	1.55018	1.42918	3	2	6	5	1.5809	-0.0368349	0.0445197	1.61774	BUB1_HUMAN Mitotic checkpoint serine/threonine-protein kinase BUB1 OS=Homo sapiens GN=BUB1 PE=1 SV=1
P38606	VATA_HUMAN	-2.30194	-0.476809	0.0574	0.330948	0.212745	0.00154936	-0.211656	-0.336327	0.0201366	0.850842	1.08207	2.01487	32	24	21	23	1.31592	-0.300439	0.00971357	1.61636	VATA_HUMAN V-type proton ATPase catalytic subunit A OS=Homo sapiens GN=ATP6V1A PE=1 SV=2
Q6ZWJ1	STXB4_HUMAN	-1.72242	0.061746	-0.114391	-0.349057	-0.53312	-0.214465	0.549586	-1.42878	-2.00867	1.17321	0.84606	0.90286	4	3	2	1	0.974045	-0.639952	0.0116932	1.614	STXB4_HUMAN Syntaxin-binding protein 4 OS=Homo sapiens GN=STXBP4 PE=1 SV=2
Q9BV44	THUM3_HUMAN	-2.15582	-0.944722	-0.788927	-1.37153	-0.498756	-0.819867	-1.75477	-1.84883	-1.48888	0.170303	-0.0755921	0.856507	4	8	4	4	0.317073	-1.2969	0.00130564	1.61397	THUM3_HUMAN THUMP domain-containing protein 3 OS=Homo sapiens GN=THUMPD3 PE=1 SV=1
Q96Q05	TPPC9_HUMAN	-0.38689	-0.367575	-0.294314	-1.40868	-0.242263	-0.38918	0.125772	0.722453	0.520123	1.36884	1.66748	1.23099	2	2	1	2	1.42244	-0.191172	0.00152249	1.61361	TPPC9_HUMAN Trafficking protein particle complex subunit 9 OS=Homo sapiens GN=TRAPPC9 PE=1 SV=2
P49005	DPOD2_HUMAN	0.0902558	0.302649	-1.96538	-0.777354	0.046872	-0.285901	-0.139464	-0.0442022	0.113002	1.55526	0.926105	1.46856	7	5	7	7	1.31664	-0.295503	0.00370876	1.61214	DPOD2_HUMAN DNA polymerase delta subunit 2 OS=Homo sapiens GN=POLD2 PE=1 SV=1
Q6DKJ4	NXN_HUMAN	-1.72442	-1.38803	-1.99534	-1.80073	-0.872996	-1.82265	-0.713361	-1.09247	-0.857516	0.257808	0.031742	0.451804	5	5	7	6	0.247118	-1.36306	0.00030881	1.61018	NXN_HUMAN Nucleoredoxin OS=Homo sapiens GN=NXN PE=1 SV=2
O60942	MCE1_HUMAN	-1.51368	-1.26662	0.292516	-0.667199	-0.0113946	-0.181188	0.581346	0.219629	0.46518	1.33249	1.0455	1.7584	4	7	7	6	1.3788	-0.231268	0.00599847	1.61006	MCE1_HUMAN mRNA-capping enzyme OS=Homo sapiens GN=RNGTT PE=1 SV=1
Q8WXG6	MADD_HUMAN	-1.30492	-1.01448	-0.487713	-0.488724	0.150557	-0.076705	-0.383249	-0.662096	-0.488565	0.962442	0.623014	1.65039	11	10	14	7	1.07862	-0.528432	0.000365271	1.60705	MADD_HUMAN MAP kinase-activating death domain protein OS=Homo sapiens GN=MADD PE=1 SV=2
Q9P000	COMD9_HUMAN	-0.496512	-0.779034	-2.0069	-1.56584	0.00555259	-0.624858	-1.05841	-1.61849	-0.91467	0.46394	0.469522	0.847031	5	5	4	6	0.593498	-1.00657	0.00185097	1.60007	COMD9_HUMAN COMM domain-containing protein 9 OS=Homo sapiens GN=COMMD9 PE=1 SV=2
Q15418	KS6A1_HUMAN	-1.88064	-0.430014	1.52198	-0.760985	0.48111	0.33528	-0.376475	-0.570564	-0.348204	1.14419	1.12617	1.84044	27	16	17	23	1.37027	-0.22539	0.0195232	1.59566	KS6A1_HUMAN Ribosomal protein S6 kinase alpha-1 OS=Homo sapiens GN=RPS6KA1 PE=1 SV=2
Q8WUX9	CHMP7_HUMAN	-1.6773	-0.708839	0.0764431	-1.60279	0.555515	0.651491	0.38328	0.190431	0.43632	1.05359	1.94595	1.21814	4	6	4	2	1.40589	-0.188383	0.01778	1.59428	CHMP7_HUMAN Charged multivesicular body protein 7 OS=Homo sapiens GN=CHMP7 PE=1 SV=1
Q7Z6Z7	HUWE1_HUMAN	-0.954768	-0.914187	-1.71758	0.0608998	-0.0267245	-0.33138	-0.220129	-0.322866	-0.0144767	0.991757	0.96731	1.33255	43	33	37	31	1.09721	-0.493468	0.00120776	1.59067	HUWE1_HUMAN E3 ubiquitin-protein ligase HUWE1 OS=Homo sapiens GN=HUWE1 PE=1 SV=3
Q86WB0	NIPA_HUMAN	-0.272585	0.245452	-1.85593	0.00354315	0.50687	0.923614	0.824811	0.500815	1.15799	1.84439	1.63501	1.97044	12	5	12	14	1.81661	0.226065	0.0146344	1.59055	NIPA_HUMAN Nuclear-interacting partner of ALK OS=Homo sapiens GN=ZC3HC1 PE=1 SV=1
O75190	DNJB6_HUMAN	-1.03581	-0.192326	1.57822	-1.19221	0.963801	0.876825	0.768147	0.431035	0.939533	1.8268	1.78941	2.1825	6	4	8	5	1.93291	0.348579	0.0199045	1.58433	DNJB6_HUMAN DnaJ homolog subfamily B member 6 OS=Homo sapiens GN=DNAJB6 PE=1 SV=2
P21399	ACOC_HUMAN	-2.09456	-1.64267	-2.0004	-1.58217	-0.730765	-1.16754	-1.17212	-0.782585	-0.781157	0.339695	-0.0305976	0.455351	28	20	19	18	0.254816	-1.32822	0.000610711	1.58303	ACOC_HUMAN Cytoplasmic aconitate hydratase OS=Homo sapiens GN=ACO1 PE=1 SV=3
P52739	ZN131_HUMAN	-2.29439	-0.475148	0.435628	0.75932	1.04922	0.993621	0.426498	0.751385	0.663834	1.9603	1.46314	2.09026	3	5	4	3	1.8379	0.256664	0.0326256	1.58124	ZN131_HUMAN Zinc finger protein 131 OS=Homo sapiens GN=ZNF131 PE=1 SV=2
Q6PJG6	BRAT1_HUMAN	-2.42175	-0.746565	-1.15906	0.675846	0.547108	0.642187	0.898921	0.419227	0.940214	1.53076	1.43465	1.70663	14	15	12	13	1.55735	-0.0226525	0.0460351	1.58	BRAT1_HUMAN BRCA1-associated ATM activator 1 OS=Homo sapiens GN=BRAT1 PE=1 SV=2
Q9Y5B8	NDK7_HUMAN	-1.36262	-1.2572	0.162076	-1.06346	0.494668	0.409261	0.257699	-0.0640808	0.412809	1.47581	1.13623	1.45466	4	8	7	5	1.35556	-0.223427	0.00684303	1.57899	NDK7_HUMAN Nucleoside diphosphate kinase 7 OS=Homo sapiens GN=NME7 PE=1 SV=1
Q08379	GOGA2_HUMAN	-1.04908	0.662062	-0.613743	-1.22211	0.467541	-0.358981	-0.692262	-0.814376	-0.167124	0.884599	0.990882	1.59767	39	17	28	21	1.15772	-0.420897	0.00281576	1.57861	GOGA2_HUMAN Golgin subfamily A member 2 OS=Homo sapiens GN=GOLGA2 PE=1 SV=3
R4GMX3	R4GMX3_HUMAN	0.757958	1.70942	-0.74234	-0.0182028	-0.289624	-0.879198	-0.578841	-1.40962	-0.813847	1.41182	1.09441	1.45738	1	2	1	1	1.3212	-0.251588	0.0207294	1.57279	R4GMX3_HUMAN Protein COMMD3-BMI1 OS=Homo sapiens GN=COMMD3-BMI1 PE=4 SV=1
Q9Y5A7	NUB1_HUMAN	-1.98375	-0.458695	1.08766	-0.66464	0.480365	0.176513	-0.614955	-0.862379	-0.565527	0.968574	0.985023	1.61903	7	7	7	7	1.19088	-0.378379	0.0150788	1.56926	NUB1_HUMAN NEDD8 ultimate buster 1 OS=Homo sapiens GN=NUB1 PE=1 SV=2
P33981	TTK_HUMAN	-0.785697	-1.53902	0.230474	-1.62815	-0.595153	-0.74777	-0.50141	-0.510177	-0.524525	1.12872	0.890057	0.483522	11	9	3	5	0.834101	-0.733492	0.00118796	1.56759	TTK_HUMAN Dual specificity protein kinase TTK OS=Homo sapiens GN=TTK PE=1 SV=2
Q96K76	UBP47_HUMAN	-0.815994	-1.66074	-1.98693	-2.89413	-0.547247	-0.725689	-0.63837	-0.86889	-0.773681	0.276404	0.142318	0.641139	13	17	19	20	0.353287	-1.21241	0.00879838	1.56569	UBP47_HUMAN Ubiquitin carboxyl-terminal hydrolase 47 OS=Homo sapiens GN=USP47 PE=1 SV=3
P31751	AKT2_HUMAN	-0.960165	-0.147697	-0.138948	-0.350499	-0.0827644	-0.155737	-0.101432	-0.763864	-0.570414	1.00224	0.757601	1.84052	7	7	9	12	1.20012	-0.363502	0.00012005	1.56362	AKT2_HUMAN RAC-beta serine/threonine-protein kinase OS=Homo sapiens GN=AKT2 PE=1 SV=2
Q562F6	SGO2_HUMAN	-0.214793	0.690126	-2.00163	-1.22304	1.14101	0.988777	0.867757	0.501211	0.960048	1.39807	1.80599	2.05379	3	6	2	1	1.75262	0.189941	0.0420844	1.56268	SGO2_HUMAN Shugoshin 2 OS=Homo sapiens GN=SGO2 PE=1 SV=2
Q8NBT2	SPC24_HUMAN	-1.75553	-0.203697	-1.50045	-0.520214	0.0986309	0.0318843	-0.823242	-1.12628	-1.08974	0.640087	0.777478	0.96659	5	5	5	4	0.794718	-0.765403	0.00288455	1.56012	SPC24_HUMAN Kinetochore protein Spc24 OS=Homo sapiens GN=SPC24 PE=1 SV=2
O95677	EYA4_HUMAN	-0.280661	-2.15041	-1.53433	-0.784252	0.502888	0.755181	0.515263	0.65879	0.677699	1.63726	0.812209	1.67701	1	2	3	2	1.37549	-0.182203	0.0401993	1.5577	EYA4_HUMAN Eyes absent homolog 4 OS=Homo sapiens GN=EYA4 PE=1 SV=2
Q13107	UBP4_HUMAN	0.862222	-0.450344	0.0410411	-1.67255	-0.327462	-0.754578	-0.768844	-0.389765	-0.412167	1.13594	0.763909	1.48241	2	7	6	6	1.12742	-0.430271	0.00391928	1.55769	UBP4_HUMAN Ubiquitin carboxyl-terminal hydrolase 4 OS=Homo sapiens GN=USP4 PE=1 SV=3
Q6ICB0	DESI1_HUMAN	-2.70908	-0.815532	-0.598752	-0.161805	0.116188	-0.530366	0.106607	-0.147719	-0.35528	1.12154	0.648344	1.20389	3	2	1	2	0.991258	-0.566194	0.0137613	1.55745	DESI1_HUMAN Desumoylating isopeptidase 1 OS=Homo sapiens GN=DESI1 PE=1 SV=1
P25208	NFYB_HUMAN	-0.0221269	0.281727	-1.05907	1.51093	-0.296644	0.620778	1.14056	1.25763	1.12517	2.4388	1.75023	2.0023	1	2	1	2	2.06378	0.50655	0.0132158	1.55723	NFYB_HUMAN Nuclear transcription factor Y subunit beta OS=Homo sapiens GN=NFYB PE=1 SV=2
Q9NUX5	POTE1_HUMAN	-0.829946	0.421294	-0.0202234	-1.34307	-0.980176	-0.424057	-0.0358984	0.0644669	0.0957175	1.30057	0.747288	1.58907	3	4	1	1	1.21231	-0.339099	0.00200594	1.55141	POTE1_HUMAN Protection of telomeres protein 1 OS=Homo sapiens GN=POT1 PE=1 SV=1
Q8NEZ2	VP37A_HUMAN	-1.11913	-0.433212	-0.452236	0.821463	-1.24938	-0.785037	-1.21639	-1.31076	-1.06094	0.837266	0.689046	0.852609	3	1	2	3	0.792974	-0.75618	0.00334414	1.54915	VP37A_HUMAN Vacuolar protein sorting-associated protein 37A OS=Homo sapiens GN=VPS37A PE=1 SV=1
P0CG29	GST2_HUMAN	-1.13707	-0.0403072	-1.55769	-0.449991	1.15387	0.368904	0.54973	0.487183	0.0564381	1.31781	1.50413	1.63097	5	1	1	1	1.4843	-0.0632149	0.0131177	1.54752	GST2_HUMAN Glutathione S-transferase theta-2 OS=Homo sapiens GN=GSTT2 PE=1 SV=1
Q9H269	VPS16_HUMAN	-1.39915	-0.478548	-2.73256	-0.738477	0.0617295	0.14873	-0.606632	-0.963676	-0.577687	0.861858	0.574593	0.776646	8	4	4	10	0.737699	-0.809586	0.0134275	1.54728	VPS16_HUMAN Vacuolar protein sorting-associated protein 16 homolog OS=Homo sapiens GN=VPS16 PE=1 SV=2
Q96FZ2	HMCES_HUMAN	-2.40625	0.525904	-0.51516	0.796857	0.377677	0.262614	0.419187	0.498504	0.39502	1.6191	1.34791	1.78843	6	7	7	5	1.58515	0.0393726	0.0256835	1.54577	HMCES_HUMAN Embryonic stem cell-specific 5-hydroxymethylcytosine-binding protein OS=Homo sapiens GN=HMCES PE=1 SV=1
Q9NX07	TSAP1_HUMAN	-0.71578	-0.66547	-0.619726	0.301433	-0.650714	-0.405644	-0.387604	-0.839691	-0.455527	0.963035	0.860883	1.33344	2	1	1	2	1.05245	-0.493191	2.67629e-05	1.54564	TSAP1_HUMAN tRNA selenocysteine 1-associated protein 1 OS=Homo sapiens GN=TRNAU1AP PE=1 SV=1
O75446	SAP30_HUMAN	0.0948044	0.863538	-2.81287	-1.47419	0.170962	0.20127	-0.149499	0.00943738	0.0625055	1.28485	0.512198	1.8194	1	4	2	1	1.20548	-0.337116	0.0499359	1.5426	SAP30_HUMAN Histone deacetylase complex subunit SAP30 OS=Homo sapiens GN=SAP30 PE=1 SV=1
Q96JJ3	ELMO2_HUMAN	-0.935348	-1.34904	-1.29098	-1.17756	-0.397838	-0.744422	-1.29416	-1.38664	-0.654259	0.907859	0.0254742	0.617164	8	6	10	6	0.516832	-1.02558	0.00011111	1.54242	ELMO2_HUMAN Engulfment and cell motility protein 2 OS=Homo sapiens GN=ELMO2 PE=1 SV=2
Q86UV5	UBP48_HUMAN	-1.12855	0.337138	-0.163003	-0.186981	1.15406	0.787193	0.519934	0.356258	0.699178	1.94235	1.53753	1.93272	20	17	17	25	1.8042	0.263914	0.00369338	1.54028	UBP48_HUMAN Ubiquitin carboxyl-terminal hydrolase 48 OS=Homo sapiens GN=USP48 PE=1 SV=1
Q2NKX8	ERC6L_HUMAN	-0.8937	-0.166343	-0.255874	-1.51241	-0.0890551	-0.158576	0.215327	0.207827	-0.481574	1.04101	1.15718	1.37463	3	7	4	2	1.19094	-0.348264	0.000953445	1.5392	ERC6L_HUMAN DNA excision repair protein ERCC-6-like OS=Homo sapiens GN=ERCC6L PE=1 SV=1
Q9UGJ1	GCP4_HUMAN	-0.906179	-0.939923	-0.130572	-0.323184	-0.121569	-0.519494	-0.790999	-0.928244	-1.06188	1.0277	0.491002	1.1908	6	13	5	3	0.903167	-0.635783	9.27063e-05	1.53895	GCP4_HUMAN Gamma-tubulin complex component 4 OS=Homo sapiens GN=TUBGCP4 PE=1 SV=1
Q15185	TEBP_HUMAN	-0.254281	-2.35926	-1.97972	-2.92363	-0.419365	-0.900256	-1.04367	-1.61159	-1.42135	-0.0404688	-0.0571295	0.404123	7	8	10	10	0.102175	-1.43479	0.0163346	1.53697	TEBP_HUMAN Prostaglandin E synthase 3 OS=Homo sapiens GN=PTGES3 PE=1 SV=1
Q9BTE6	AASD1_HUMAN	-2.22618	-0.803945	-0.955353	-1.32426	-1.3702	-1.37549	-1.03339	-1.03966	-1.15274	0.422482	-0.194909	0.586363	8	6	5	5	0.271312	-1.25347	0.000253193	1.52478	AASD1_HUMAN Alanyl-tRNA editing protein Aarsd1 OS=Homo sapiens GN=AARSD1 PE=1 SV=2
O75164	KDM4A_HUMAN	0.0687484	0.245995	0.646337	-1.40195	-0.279977	0.124311	0.11921	-0.628963	-0.189011	1.66194	1.08453	1.39602	2	4	1	1	1.38083	-0.143922	0.00183499	1.52475	KDM4A_HUMAN Lysine-specific demethylase 4A OS=Homo sapiens GN=KDM4A PE=1 SV=2
P22102	PUR2_HUMAN	-1.94585	-1.38698	-1.37923	-0.420977	0.472745	-0.277028	-0.669244	-0.768313	-0.436868	0.602767	0.422714	1.27102	42	34	36	42	0.765502	-0.75686	0.00699563	1.52236	PUR2_HUMAN Trifunctional purine biosynthetic protein adenosine-3 OS=Homo sapiens GN=GART PE=1 SV=1
P10398	ARAF_HUMAN	-0.523699	0.0380939	0.570794	-0.263839	0.0421316	-0.323489	-0.239363	-0.351319	0.00271215	1.28743	1.22893	1.69693	10	6	7	15	1.40443	-0.116442	2.4857e-05	1.52088	ARAF_HUMAN Serine/threonine-protein kinase A-Raf OS=Homo sapiens GN=ARAF PE=1 SV=2
Q99871	HAUS7_HUMAN	-0.159035	-0.674642	-0.376423	-0.901264	0.0210531	-0.296002	-0.822869	-0.790806	0.161974	1.45557	0.685533	1.14207	1	4	4	4	1.09439	-0.426446	0.000158971	1.52084	HAUS7_HUMAN HAUS augmin-like complex subunit 7 OS=Homo sapiens GN=HAUS7 PE=1 SV=3
Q9NTJ3	SMC4_HUMAN	-1.8255	-0.775908	1.06861	-1.59774	0.478202	0.201121	0.0601092	-0.163769	0.198334	1.12201	1.1886	1.4613	76	39	48	57	1.2573	-0.261838	0.0244745	1.51914	SMC4_HUMAN Structural maintenance of chromosomes protein 4 OS=Homo sapiens GN=SMC4 PE=1 SV=2
Q9UJ41	RABX5_HUMAN	0.514296	-0.635621	-0.571217	0.727171	-0.726	-1.0478	-0.671949	-0.531149	-0.504234	1.18045	0.773885	1.44975	6	3	8	2	1.13469	-0.382944	0.00206627	1.51764	RABX5_HUMAN Rab5 GDP/GTP exchange factor OS=Homo sapiens GN=RABGEF1 PE=1 SV=2
Q9H0H5	RGAP1_HUMAN	0.617114	-0.954203	-0.604793	-0.899796	1.25498	0.645346	1.89454	1.24189	0.782119	2.71097	1.94648	1.21897	34	15	13	18	1.95881	0.441912	0.0422327	1.51689	RGAP1_HUMAN Rac GTPase-activating protein 1 OS=Homo sapiens GN=RACGAP1 PE=1 SV=1
Q8IW35	CEP97_HUMAN	-0.373905	0.33515	-1.06176	-0.679946	-0.671363	-0.801655	-0.078637	-0.65476	-0.00993039	1.00232	0.774508	1.42776	8	7	8	8	1.0682	-0.44409	0.000335612	1.51229	CEP97_HUMAN Centrosomal protein of 97 kDa OS=Homo sapiens GN=CEP97 PE=1 SV=1
Q9UEW8	STK39_HUMAN	-1.94162	-0.488122	-1.228	-0.342936	0.37323	-0.325474	0.265945	0.075971	0.123267	1.0017	1.00964	1.3487	7	5	7	6	1.12001	-0.387527	0.0080228	1.50754	STK39_HUMAN STE20/SPS1-related proline-alanine-rich protein kinase OS=Homo sapiens GN=STK39 PE=1 SV=3
Q8TER5	ARH40_HUMAN	-1.52563	0.744019	-1.62737	-0.365943	0.312864	0.195052	0.174184	0.335057	0.717058	1.35725	1.2511	1.56144	15	10	13	7	1.38993	-0.115634	0.0179705	1.50556	ARH40_HUMAN Rho guanine nucleotide exchange factor 40 OS=Homo sapiens GN=ARHGEF40 PE=1 SV=3
Q9Y263	PLAP_HUMAN	-0.677625	-1.29119	-1.73049	-2.16022	-0.737108	-0.924148	-0.794249	-1.21892	-1.02308	0.186571	0.200177	0.60085	24	17	22	25	0.329199	-1.173	0.000581941	1.5022	PLAP_HUMAN Phospholipase A-2-activating protein OS=Homo sapiens GN=PLAA PE=1 SV=2
Q9Y448	SKAP_HUMAN	-2.25237	0.19147	0.639521	0.464312	-0.707272	-1.01355	-0.259233	-0.266453	-0.46201	1.08708	1.36243	0.830126	5	3	6	4	1.09321	-0.407288	0.017423	1.5005	SKAP_HUMAN Small kinetochore-associated protein OS=Homo sapiens GN=KNSTRN PE=1 SV=2
Q15058	KIF14_HUMAN	-0.551913	-0.848687	-0.679879	-0.120742	0.336246	0.430882	0.604257	0.350521	0.514935	1.72749	1.05418	1.7297	45	22	18	24	1.50379	0.00395786	0.00180204	1.49983	KIF14_HUMAN Kinesin-like protein KIF14 OS=Homo sapiens GN=KIF14 PE=1 SV=1
Q9NUQ8	ABCF3_HUMAN	-1.8565	-0.608719	1.33016	-0.00133807	0.567559	0.304811	-0.183747	-0.363077	-0.138836	1.15226	0.948374	2.08011	16	14	15	11	1.39358	-0.105521	0.0214088	1.4991	ABCF3_HUMAN ATP-binding cassette sub-family F member 3 OS=Homo sapiens GN=ABCF3 PE=1 SV=2
Q15208	STK38_HUMAN	-1.6013	-1.84519	1.07779	-0.159318	0.063457	-0.516741	-0.994138	-0.612118	-0.457498	0.573169	0.756134	1.4809	6	6	4	2	0.936735	-0.560562	0.0202035	1.4973	STK38_HUMAN Serine/threonine-protein kinase 38 OS=Homo sapiens GN=STK38 PE=1 SV=1
Q9Y2X9	ZN281_HUMAN	-1.37206	0.338369	-1.26031	-0.433124	0.901436	0.456202	0.407309	0.225381	0.344638	1.25919	1.65525	1.44112	10	8	7	7	1.45185	-0.0435732	0.0109959	1.49542	ZN281_HUMAN Zinc finger protein 281 OS=Homo sapiens GN=ZNF281 PE=1 SV=1
Q9Y5B0	CTDP1_HUMAN	-0.819517	-0.428045	-0.802893	-1.03878	0.0465292	-0.101753	-0.61571	-1.03745	-0.426559	0.819737	0.534747	1.37987	7	7	5	6	0.911453	-0.580464	0.0002108	1.49192	CTDP1_HUMAN RNA polymerase II subunit A C-terminal domain phosphatase OS=Homo sapiens GN=CTDP1 PE=1 SV=3
Q16656	NRF1_HUMAN	0.113532	-0.160961	-1.61174	0.0386664	0.155255	0.293573	0.207201	0.163403	-0.0521985	1.78485	1.19451	1.21074	4	1	1	2	1.3967	-0.0948077	0.00211698	1.49151	NRF1_HUMAN Nuclear respiratory factor 1 OS=Homo sapiens GN=NRF1 PE=1 SV=1
Q86XL3	ANKL2_HUMAN	-2.22811	-0.617007	0.30145	-0.019548	0.122962	-0.0511199	0.0624161	-0.0834646	0.245981	1.12883	1.41339	1.17471	23	13	15	20	1.23898	-0.251827	0.0101241	1.49081	ANKL2_HUMAN Ankyrin repeat and LEM domain-containing protein 2 OS=Homo sapiens GN=ANKLE2 PE=1 SV=4
Q8TDX7	NEK7_HUMAN	-1.58424	0.202536	0.000252152	0.974078	0.298692	-0.00493813	0.0937358	0.115663	0.26902	1.50805	1.39523	1.68505	8	8	7	7	1.52945	0.0405335	0.00434558	1.48891	NEK7_HUMAN Serine/threonine-protein kinase Nek7 OS=Homo sapiens GN=NEK7 PE=1 SV=1
Q7KZF4	SND1_HUMAN	-0.982099	-0.995048	-0.896918	-0.311287	0.506741	0.0903698	0.00563254	0.196767	0.108577	1.15572	0.990015	1.55764	58	38	46	51	1.23446	-0.253029	0.00170908	1.48749	SND1_HUMAN Staphylococcal nuclease domain-containing protein 1 OS=Homo sapiens GN=SND1 PE=1 SV=1
Q9Y2V7	COG6_HUMAN	-1.72567	-1.04503	0.212088	-0.690393	-1.0293	-0.979154	-0.89124	-1.22036	-1.05546	0.286286	0.393245	0.972008	6	4	4	5	0.550513	-0.936058	0.00104606	1.48657	COG6_HUMAN Conserved oligomeric Golgi complex subunit 6 OS=Homo sapiens GN=COG6 PE=1 SV=2
Q99504	EYA3_HUMAN	0.285461	0.610317	-2.10335	-1.07341	-0.444189	-1.19327	-1.39407	-1.58396	-0.889031	0.642186	0.153799	1.06235	2	3	1	2	0.619444	-0.865056	0.0205981	1.4845	EYA3_HUMAN Eyes absent homolog 3 OS=Homo sapiens GN=EYA3 PE=1 SV=3
Q9UG63	ABCF2_HUMAN	-1.51822	-0.52295	1.41023	0.348833	1.14806	0.928147	1.21855	0.890667	1.04022	1.95065	2.06629	2.0768	34	22	20	23	2.03125	0.549282	0.0282317	1.48197	ABCF2_HUMAN ATP-binding cassette sub-family F member 2 OS=Homo sapiens GN=ABCF2 PE=1 SV=2
Q9NYL2	MLTK_HUMAN	-1.3278	-1.20155	-0.447635	-1.15816	-0.22237	-0.309483	-0.0623813	-0.111694	0.182713	1.07792	0.798438	1.01568	5	5	6	7	0.964014	-0.517596	0.00137892	1.48161	MLTK_HUMAN Mitogen-activated protein kinase kinase kinase MLT OS=Homo sapiens GN=ZAK PE=1 SV=3
P67870	CSK2B_HUMAN	0.38644	0.645373	-0.430069	-0.11592	0.926699	0.991729	1.0071	1.41573	0.805953	2.40636	2.23789	1.67539	8	9	6	7	2.10655	0.625893	0.00241172	1.48065	CSK2B_HUMAN Casein kinase II subunit beta OS=Homo sapiens GN=CSNK2B PE=1 SV=1
O43314	VIP2_HUMAN	-1.60831	-0.366243	-0.57186	-1.08399	0.140634	-0.154497	-0.0963102	0.0399435	0.158434	0.80412	1.13517	1.31172	10	12	9	7	1.08367	-0.393579	0.00244576	1.47725	VIP2_HUMAN Inositol hexakisphosphate and diphosphoinositol-pentakisphosphate kinase 2 OS=Homo sapiens GN=PPIP5K2 PE=1 SV=3
Q15365	PCBP1_HUMAN	-0.720686	-0.352099	-1.20773	-0.975917	-0.314947	-0.304114	-0.206711	-0.904188	-0.233261	0.722429	0.633371	1.33371	17	21	21	17	0.896503	-0.579961	0.000157633	1.47646	PCBP1_HUMAN Poly(rC)-binding protein 1 OS=Homo sapiens GN=PCBP1 PE=1 SV=2
P19387	RPB3_HUMAN	-1.12835	-0.368768	-1.01354	0.951555	0.513165	0.751991	0.758527	0.733386	0.988321	1.68229	1.50567	1.96822	10	12	7	9	1.71873	0.242921	0.0159119	1.4758	RPB3_HUMAN DNA-directed RNA polymerase II subunit RPB3 OS=Homo sapiens GN=POLR2C PE=1 SV=2
Q9BUI4	RPC3_HUMAN	-0.604998	-0.909519	-0.711399	-1.33706	0.623476	0.432742	0.57188	0.569515	0.199466	1.35954	1.27387	1.40325	10	7	11	10	1.34555	-0.129544	0.00860065	1.4751	RPC3_HUMAN DNA-directed RNA polymerase III subunit RPC3 OS=Homo sapiens GN=POLR3C PE=1 SV=1
Q309B1	TR16L_HUMAN	-1.16231	-1.49155	-1.0448	-2.61906	-1.13265	-1.28471	-1.27295	-1.19973	-0.995333	0.145323	-0.1812	0.374731	4	7	4	4	0.112952	-1.3559	0.000740559	1.46885	TR16L_HUMAN Tripartite motif-containing protein 16-like protein OS=Homo sapiens GN=TRIM16L PE=2 SV=3
Q2KHR3	QSER1_HUMAN	-1.27647	-0.666346	-0.514037	0.229569	0.0604109	-0.0388491	0.327662	-0.123221	-0.0624188	1.29435	1.00546	1.41823	15	16	14	11	1.23935	-0.2293	0.000764087	1.46865	QSER1_HUMAN Glutamine and serine-rich protein 1 OS=Homo sapiens GN=QSER1 PE=1 SV=3
Q99570	PI3R4_HUMAN	-1.21568	-1.61504	-1.04849	-1.59896	0.0281936	-0.246785	-0.369081	-0.655639	-0.247461	0.717197	0.437747	0.925898	12	13	16	9	0.693614	-0.774326	0.00286573	1.46794	PI3R4_HUMAN Phosphoinositide 3-kinase regulatory subunit 4 OS=Homo sapiens GN=PIK3R4 PE=1 SV=3
Q96FJ0	STALP_HUMAN	-2.37373	0.289706	0.240508	-0.608632	0.262832	0.73918	0.0490138	0.102865	0.264252	1.52696	1.15173	1.37814	4	7	3	8	1.35228	-0.11489	0.0235228	1.46717	STALP_HUMAN AMSH-like protease OS=Homo sapiens GN=STAMBPL1 PE=1 SV=2
Q6ZS17	FA65A_HUMAN	-0.752574	-2.44525	-0.0576292	-1.85479	-0.350834	-0.687464	-0.762788	-0.54711	0.0122809	0.584621	0.337876	0.995002	8	9	6	5	0.639166	-0.827351	0.0143078	1.46652	FA65A_HUMAN Protein FAM65A OS=Homo sapiens GN=FAM65A PE=1 SV=1
G3V1V0	G3V1V0_HUMAN	-0.251539	0.84509	-1.12451	-1.3881	0.145034	-0.221245	0.0998456	-0.413185	0.503866	1.52588	1.4269	0.838476	2	2	1	1	1.26375	-0.200527	0.00780144	1.46428	G3V1V0_HUMAN Myosin light polypeptide 6 OS=Homo sapiens GN=MYL6 PE=1 SV=1
Q6ZRQ5	MMS22_HUMAN	0.0163421	-0.0532642	0.403271	-0.640816	-0.25218	-0.85667	-0.317645	-0.801367	-0.842829	0.423888	0.883529	1.96159	3	9	5	5	1.08967	-0.371684	0.00207525	1.46135	MMS22_HUMAN Protein MMS22-like OS=Homo sapiens GN=MMS22L PE=1 SV=3
O14965	AURKA_HUMAN	-0.409638	0.450581	-0.170283	-2.21619	0.898407	0.748348	0.552851	0.670966	0.461178	1.63788	1.87744	1.18827	9	8	7	6	1.56786	0.10958	0.032579	1.45828	AURKA_HUMAN Aurora kinase A OS=Homo sapiens GN=AURKA PE=1 SV=2
P32019	I5P2_HUMAN	-1.5113	-2.431	0.173982	-1.13317	-0.607798	-0.95323	-0.684987	-0.465273	-0.488067	0.157316	0.605502	0.911191	1	1	1	1	0.558003	-0.900093	0.00968363	1.4581	I5P2_HUMAN Type II inositol 1,4,5-trisphosphate 5-phosphatase OS=Homo sapiens GN=INPP5B PE=1 SV=4
O75676	KS6A4_HUMAN	-1.30218	-0.798602	1.19756	-0.0828914	0.471489	0.433038	0.194138	-0.458374	0.200633	1.38305	1.2734	1.66352	10	7	9	13	1.43999	-0.016132	0.00890386	1.45612	KS6A4_HUMAN Ribosomal protein S6 kinase alpha-4 OS=Homo sapiens GN=RPS6KA4 PE=1 SV=1
Q12933	TRAF2_HUMAN	-0.197962	-0.278811	0.735002	0.658734	-0.109268	0.427882	0.431821	0.569535	0.879684	1.93086	1.44302	2.0313	10	4	9	9	1.80172	0.346291	0.000342014	1.45543	TRAF2_HUMAN TNF receptor-associated factor 2 OS=Homo sapiens GN=TRAF2 PE=1 SV=2
Q8IWV8	UBR2_HUMAN	0.0455197	-1.03319	0.0372618	-2.55834	0.0201711	-0.537846	-0.184709	0.00851446	0.0357079	0.865306	0.805092	1.28179	2	7	6	3	0.984064	-0.462989	0.0198362	1.44705	UBR2_HUMAN E3 ubiquitin-protein ligase UBR2 OS=Homo sapiens GN=UBR2 PE=1 SV=1
Q9H0U9	TSYL1_HUMAN	0.388833	0.0343599	-0.706025	-2.0812	0.325162	0.0117173	0.0599457	-0.306422	-0.119264	1.04741	0.901875	1.5907	9	7	5	4	1.18	-0.265877	0.0108449	1.44587	TSYL1_HUMAN Testis-specific Y-encoded-like protein 1 OS=Homo sapiens GN=TSPYL1 PE=1 SV=3
C9JA93	C9JA93_HUMAN	-1.62787	-1.97437	-0.493481	-0.636609	-0.527414	-1.05058	-1.06806	-0.368856	-0.702864	0.356057	0.6278	0.52417	1	1	1	1	0.502676	-0.9389	0.00140876	1.44158	C9JA93_HUMAN TBC1 domain family member 15 (Fragment) OS=Homo sapiens GN=TBC1D15 PE=1 SV=1
P61970	NTF2_HUMAN	0.288872	-0.275916	-0.823061	-0.321857	-1.4075	-0.630911	-1.24338	-0.575403	-1.04372	1.54344	0.331954	0.437184	4	3	5	5	0.770858	-0.670319	0.00318105	1.44118	NTF2_HUMAN Nuclear transport factor 2 OS=Homo sapiens GN=NUTF2 PE=1 SV=1
P53814	SMTN_HUMAN	-0.838465	0.0735904	0.293162	-0.594069	0.00818931	-0.220749	0.722395	0.518261	0.855005	1.66983	1.40549	1.51969	5	2	3	2	1.53167	0.0908134	0.00189959	1.44086	SMTN_HUMAN Smoothelin OS=Homo sapiens GN=SMTN PE=1 SV=7
Q92615	LAR4B_HUMAN	-1.93708	-0.984814	0.18018	-0.243651	0.915602	0.645857	0.629748	0.770202	0.77994	1.61778	1.44292	1.51377	13	6	9	8	1.52482	0.0839979	0.0327701	1.44083	LAR4B_HUMAN La-related protein 4B OS=Homo sapiens GN=LARP4B PE=1 SV=3
Q9Y3D0	MIP18_HUMAN	0.0864459	-0.168848	-1.08315	-0.945822	-1.19743	-1.33474	-1.59847	-1.4092	-1.31419	0.780337	0.320632	0.227896	2	4	3	4	0.442955	-0.996155	0.002298	1.43911	MIP18_HUMAN Mitotic spindle-associated MMXD complex subunit MIP18 OS=Homo sapiens GN=FAM96B PE=1 SV=1
Q99439	CNN2_HUMAN	0.675425	-0.958659	-0.725828	-0.807505	-1.81817	-2.48721	-1.82652	-1.7685	-1.97495	0.142541	0.103576	0.173397	22	7	8	15	0.139838	-1.2991	0.0293869	1.43894	CNN2_HUMAN Calponin-2 OS=Homo sapiens GN=CNN2 PE=1 SV=4
Q92871	PMM1_HUMAN	-1.72587	-1.65004	-0.14544	0.478843	-0.61712	-0.773836	-0.818389	-2.14006	-1.43736	-0.244755	0.738196	0.868763	2	2	4	1	0.454068	-0.98103	0.0220678	1.4351	PMM1_HUMAN Phosphomannomutase 1 OS=Homo sapiens GN=PMM1 PE=1 SV=2
Q13952	NFYC_HUMAN	-0.131262	0.373744	0.234538	0.540277	0.397446	0.960411	1.44289	1.29311	1.15925	2.2977	1.90898	2.17979	6	4	5	3	2.12882	0.696712	0.00135303	1.43211	NFYC_HUMAN Nuclear transcription factor Y subunit gamma OS=Homo sapiens GN=NFYC PE=1 SV=3
Q9Y5N6	ORC6_HUMAN	0.205324	-0.867962	-0.53535	0.799581	1.25874	1.12541	-0.292578	-0.188768	-0.0849165	1.18149	1.25704	2.32335	4	4	3	2	1.58729	0.15772	0.0145948	1.42957	ORC6_HUMAN Origin recognition complex subunit 6 OS=Homo sapiens GN=ORC6 PE=1 SV=1
P57721	PCBP3_HUMAN	-0.181329	0.358905	0.694304	-1.30102	0.0372444	0.238789	0.337942	0.145339	0.366492	1.50733	1.44468	1.55153	11	6	8	8	1.50118	0.0774073	0.00190188	1.42377	PCBP3_HUMAN Poly(rC)-binding protein 3 OS=Homo sapiens GN=PCBP3 PE=2 SV=2
Q13322	GRB10_HUMAN	-0.698247	0.262124	0.182684	0.597768	-0.88189	-0.648515	-0.76838	0.354595	-0.479779	1.35322	1.48856	0.734333	1	1	1	1	1.19204	-0.231071	0.00277201	1.42311	GRB10_HUMAN Growth factor receptor-bound protein 10 OS=Homo sapiens GN=GRB10 PE=1 SV=2
Q96T76	MMS19_HUMAN	-0.0730878	-0.578685	-2.44858	-0.698574	-0.0795413	-0.45438	-1.11189	-1.44199	-1.35568	0.601833	0.424085	0.487795	7	10	11	8	0.504571	-0.915823	0.0108394	1.42039	MMS19_HUMAN MMS19 nucleotide excision repair protein homolog OS=Homo sapiens GN=MMS19 PE=1 SV=2
Q8IX90	SKA3_HUMAN	-0.798222	0.271799	-0.126038	0.165872	0.123466	-0.305284	-0.286916	-1.02651	0.00328518	1.01028	0.78774	1.79877	4	4	6	2	1.19893	-0.219839	0.000960997	1.41877	SKA3_HUMAN Spindle and kinetochore-associated protein 3 OS=Homo sapiens GN=SKA3 PE=1 SV=2
P19623	SPEE_HUMAN	-1.4973	-1.65732	-1.19691	-1.83641	-1.01572	-1.08426	-1.44581	-1.52903	-1.4699	-0.0760679	-0.331734	0.419672	12	18	11	12	0.00395674	-1.41474	2.85204e-05	1.4187	SPEE_HUMAN Spermidine synthase OS=Homo sapiens GN=SRM PE=1 SV=1
O15391	TYY2_HUMAN	-0.68443	0.507586	-0.521107	0.175606	2.19348	1.53699	1.53797	1.35939	1.15012	2.70173	2.04759	1.92326	4	3	1	2	2.22419	0.806178	0.0411022	1.41801	TYY2_HUMAN Transcription factor YY2 OS=Homo sapiens GN=YY2 PE=2 SV=1
P49841	GSK3B_HUMAN	0.40748	-1.04675	-0.240378	-0.0382314	0.46437	0.413245	0.419107	0.437752	0.348365	1.41532	1.63032	1.59177	7	6	6	5	1.54581	0.12944	0.000883594	1.41637	GSK3B_HUMAN Glycogen synthase kinase-3 beta OS=Homo sapiens GN=GSK3B PE=1 SV=2
Q9NVR0	KLH11_HUMAN	-1.08483	-0.802516	1.28322	1.1734	-0.380001	-0.371947	-0.426361	-0.473991	-1.26256	1.02827	1.14662	1.28817	1	2	1	1	1.15436	-0.26062	0.0254888	1.41498	KLH11_HUMAN Kelch-like protein 11 OS=Homo sapiens GN=KLHL11 PE=1 SV=1
Q13158	FADD_HUMAN	-1.95188	-0.494642	-1.23447	-0.32127	0.0574088	-0.799886	-0.640412	-0.556484	-0.4449	0.333984	0.71679	1.0642	5	5	4	2	0.70499	-0.709615	0.0030155	1.4146	FADD_HUMAN FAS-associated death domain protein OS=Homo sapiens GN=FADD PE=1 SV=1
Q86UU1	PHLB1_HUMAN	-1.85143	-0.867713	0.863702	0.848025	0.0734022	-0.0594298	0.0574966	-0.0195778	0.516932	1.01899	1.20889	1.86924	11	9	4	11	1.3657	-0.0487329	0.0233931	1.41444	PHLB1_HUMAN Pleckstrin homology-like domain family B member 1 OS=Homo sapiens GN=PHLDB1 PE=1 SV=1
Q16644	MAPK3_HUMAN	-0.173658	-1.38426	-0.629691	-1.93528	-1.73393	-1.85808	-1.69529	-1.77569	-1.69838	-0.199974	-0.0569384	0.199878	4	3	3	7	-0.0190116	-1.43158	0.00343987	1.41257	MAPK3_HUMAN MAP kinase-activated protein kinase 3 OS=Homo sapiens GN=MAPKAPK3 PE=1 SV=1
P52564	MP2K6_HUMAN	-1.4623	-0.433423	0.972181	0.380761	0.655318	0.267967	0.27648	0.0898049	0.180981	1.58151	1.47339	1.49115	5	3	5	4	1.51535	0.103086	0.00709306	1.41226	MP2K6_HUMAN Dual specificity mitogen-activated protein kinase kinase 6 OS=Homo sapiens GN=MAP2K6 PE=1 SV=1
Q9NR46	SHLB2_HUMAN	-0.414156	-0.647504	-0.0199733	0.0964403	-0.640659	-0.647891	-1.0753	-1.84172	-1.37957	0.686963	0.522774	0.827142	10	2	8	10	0.67896	-0.730039	0.00362248	1.409	SHLB2_HUMAN Endophilin-B2 OS=Homo sapiens GN=SH3GLB2 PE=1 SV=1
P04150	GCR_HUMAN	-1.35491	-0.493405	-0.832354	0.802722	0.93782	0.613796	0.44829	0.466178	0.406559	1.52585	1.24332	1.78287	20	16	13	14	1.51735	0.110522	0.0158111	1.40682	GCR_HUMAN Glucocorticoid receptor OS=Homo sapiens GN=NR3C1 PE=1 SV=1
P19525	E2AK2_HUMAN	-0.192163	0.488535	0.750788	-0.714853	1.3212	1.08266	1.29035	1.37286	1.16749	2.18178	2.09572	2.12507	24	16	18	17	2.13419	0.729653	0.00984254	1.40454	E2AK2_HUMAN Interferon-induced, double-stranded RNA-activated protein kinase OS=Homo sapiens GN=EIF2AK2 PE=1 SV=2
Q6R327	RICTR_HUMAN	-1.80998	-0.30939	-0.000920683	0.130052	0.676286	0.276318	0.289819	0.289652	0.691061	1.4292	1.18104	1.67986	16	18	10	11	1.43004	0.0258779	0.0117048	1.40416	RICTR_HUMAN Rapamycin-insensitive companion of mTOR OS=Homo sapiens GN=RICTOR PE=1 SV=1
Q9UN37	VPS4A_HUMAN	-0.377093	-0.668331	0.657142	0.417784	0.318989	0.154293	0.0723903	0.0448636	0.0191151	1.49271	1.38078	1.54982	12	7	8	10	1.47444	0.071017	0.000163042	1.40342	VPS4A_HUMAN Vacuolar protein sorting-associated protein 4A OS=Homo sapiens GN=VPS4A PE=1 SV=1
Q8WX92	NELFB_HUMAN	-0.815068	-0.811009	-0.111597	-1.64937	0.3568	-0.064976	-0.340097	-0.580645	-0.465007	0.738395	0.964402	1.00306	13	10	13	12	0.901951	-0.497886	0.00226054	1.39984	NELFB_HUMAN Negative elongation factor B OS=Homo sapiens GN=NELFB PE=1 SV=1
Q96NU1	SAM11_HUMAN	-2.9547	-1.26808	0.337337	-0.635753	-0.38647	-1.01331	-1.58595	-1.68848	-0.606536	-0.249788	-0.179021	1.35545	2	2	3	3	0.308879	-1.0891	0.0487159	1.39798	SAM11_HUMAN Sterile alpha motif domain-containing protein 11 OS=Homo sapiens GN=SAMD11 PE=1 SV=3
Q9UHI6	DDX20_HUMAN	-1.46672	-0.602619	-1.81201	-0.298697	0.842386	0.703614	0.59506	0.210476	0.50619	1.36745	1.33272	1.05274	20	14	13	18	1.25097	-0.146925	0.0370991	1.39789	DDX20_HUMAN Probable ATP-dependent RNA helicase DDX20 OS=Homo sapiens GN=DDX20 PE=1 SV=2
Q13439	GOGA4_HUMAN	-1.95719	-0.45256	1.33088	-1.52951	-0.491725	-0.694385	-0.0483799	-0.383125	0.257687	0.762597	0.9305	1.17536	25	16	22	12	0.956153	-0.440924	0.0352996	1.39708	GOGA4_HUMAN Golgin subfamily A member 4 OS=Homo sapiens GN=GOLGA4 PE=1 SV=1
Q92966	SNPC3_HUMAN	-1.06572	0.490798	-1.35788	-1.02377	0.807746	0.605502	0.52717	-0.722129	-0.115752	1.40016	1.30291	0.859584	2	4	1	1	1.18755	-0.206003	0.021378	1.39356	SNPC3_HUMAN snRNA-activating protein complex subunit 3 OS=Homo sapiens GN=SNAPC3 PE=1 SV=1
O95361	TRI16_HUMAN	-1.67745	-1.65673	-0.443729	-0.972522	-1.3103	-1.57275	-1.13605	-1.40757	-1.22401	0.146341	0.14493	0.0723858	6	5	12	13	0.121219	-1.26679	0.000140377	1.38801	TRI16_HUMAN Tripartite motif-containing protein 16 OS=Homo sapiens GN=TRIM16 PE=1 SV=3
Q8NEM2	SHCBP_HUMAN	-1.14868	-0.241719	0.393998	0.957558	1.1469	0.754216	0.888681	0.691378	0.710855	2.21583	1.88171	1.45085	24	18	15	20	1.84946	0.461465	0.0110822	1.388	SHCBP_HUMAN SHC SH2 domain-binding protein 1 OS=Homo sapiens GN=SHCBP1 PE=1 SV=3
Q6ZN55	ZN574_HUMAN	-0.707432	0.735374	-0.732811	0.0616851	0.104829	0.126183	0.813181	0.46886	0.450737	1.49061	1.78998	1.32296	3	3	2	1	1.53452	0.146734	0.00223724	1.38778	ZN574_HUMAN Zinc finger protein 574 OS=Homo sapiens GN=ZNF574 PE=1 SV=2
Q15020	SART3_HUMAN	-1.82395	-0.708847	-0.143036	-2.12909	0.53137	0.279141	0.229104	0.301229	0.542357	0.875703	0.823782	1.47789	23	16	25	27	1.05913	-0.324637	0.0480294	1.38376	SART3_HUMAN Squamous cell carcinoma antigen recognized by T-cells 3 OS=Homo sapiens GN=SART3 PE=1 SV=1
Q9UNH6	SNX7_HUMAN	-0.268625	0.791344	0.626673	-0.27172	-0.408038	-0.255937	-0.970324	-0.984975	-0.761146	0.573957	0.712046	2.00467	3	2	4	7	1.09689	-0.278083	0.0113263	1.37497	SNX7_HUMAN Sorting nexin-7 OS=Homo sapiens GN=SNX7 PE=1 SV=1
P17096	HMGA1_HUMAN	0.80711	0.11862	2.06614	1.33364	1.48271	1.7693	2.46074	2.03378	1.84577	3.61035	3.26601	1.88602	10	9	13	13	2.92079	1.54642	0.0218974	1.37437	HMGA1_HUMAN High mobility group protein HMG-I/HMG-Y OS=Homo sapiens GN=HMGA1 PE=1 SV=3
Q7L1Q6	BZW1_HUMAN	-0.748944	-2.92767	-1.90034	-1.88112	-1.08612	-1.18611	-2.61503	-2.42427	-2.35995	-0.706479	-0.753131	-0.136376	17	17	17	19	-0.531995	-1.90328	0.0139739	1.37129	BZW1_HUMAN Basic leucine zipper and W2 domain-containing protein 1 OS=Homo sapiens GN=BZW1 PE=1 SV=1
O43379	WDR62_HUMAN	-0.826437	-0.104326	-2.56284	0.537579	0.0938922	-0.0452444	-0.227273	-0.352945	0.393625	0.525541	1.23631	1.31559	6	4	4	1	1.02581	-0.343774	0.0360755	1.36959	WDR62_HUMAN WD repeat-containing protein 62 OS=Homo sapiens GN=WDR62 PE=1 SV=4
Q92530	PSMF1_HUMAN	-0.083757	-0.93347	-1.24447	0.363838	-1.14649	-0.84905	-1.47445	-1.29904	-1.65698	0.356832	0.394614	0.581687	2	1	1	4	0.444378	-0.924873	0.0061664	1.36925	PSMF1_HUMAN Proteasome inhibitor PI31 subunit OS=Homo sapiens GN=PSMF1 PE=1 SV=2
Q8N0X7	SPG20_HUMAN	-1.57818	-1.41469	-0.056541	0.327021	-0.585451	-0.993634	-0.0668631	-0.534743	-0.498462	0.834597	0.841289	0.631287	8	5	9	10	0.769058	-0.600171	0.00486072	1.36923	SPG20_HUMAN Spartin OS=Homo sapiens GN=SPG20 PE=1 SV=1
Q7L7V1	DHX32_HUMAN	-0.951251	-0.592005	-0.501038	-0.544811	-0.0220718	0.0278196	-0.115366	0.448604	-0.255524	1.20388	1.01304	1.05215	4	7	4	1	1.08969	-0.278405	0.000272744	1.3681	DHX32_HUMAN Putative pre-mRNA-splicing factor ATP-dependent RNA helicase DHX32 OS=Homo sapiens GN=DHX32 PE=1 SV=1
O95163	ELP1_HUMAN	-1.52685	-1.33061	0.172744	-1.175	-0.0157046	-0.0492979	-0.301892	-0.53419	-0.401791	0.975812	0.591212	0.815125	20	21	17	17	0.79405	-0.573621	0.00449243	1.36767	ELP1_HUMAN Elongator complex protein 1 OS=Homo sapiens GN=IKBKAP PE=1 SV=3
P09884	DPOLA_HUMAN	-1.19805	-0.50337	-1.07196	-1.86049	0.00160218	-0.107082	0.0683094	-0.102082	0.278855	0.684899	0.656833	1.26226	26	27	28	20	0.867997	-0.499362	0.0113549	1.36736	DPOLA_HUMAN DNA polymerase alpha catalytic subunit OS=Homo sapiens GN=POLA1 PE=1 SV=2
Q96SN8	CK5P2_HUMAN	-0.920416	-0.0032762	-0.234111	-2.38891	0.131047	0.479429	-0.904109	-0.333524	0.0354266	0.736649	0.908773	1.07186	24	17	13	2	0.905762	-0.459827	0.023982	1.36559	CK5P2_HUMAN CDK5 regulatory subunit-associated protein 2 OS=Homo sapiens GN=CDK5RAP2 PE=1 SV=5
Q96PU5	NED4L_HUMAN	-1.02757	-0.28065	-0.652973	0.505273	-0.601576	-0.727103	0.253396	0.0986443	0.666672	0.866132	1.46057	1.17889	5	4	4	3	1.16853	-0.196209	0.00408618	1.36474	NED4L_HUMAN E3 ubiquitin-protein ligase NEDD4-like OS=Homo sapiens GN=NEDD4L PE=1 SV=2
Q9NP61	ARFG3_HUMAN	-0.696281	-0.952341	0.748003	-0.918935	-0.860435	-0.889499	-0.950039	-1.45938	-1.02254	0.622298	0.39317	0.725403	6	5	7	7	0.58029	-0.777938	0.00404422	1.35823	ARFG3_HUMAN ADP-ribosylation factor GTPase-activating protein 3 OS=Homo sapiens GN=ARFGAP3 PE=1 SV=1
Q8TBX8	PI42C_HUMAN	-0.894149	-0.722542	0.198872	-1.07502	0.558486	0.104497	-0.0787715	-0.0254093	-0.18373	0.916079	0.982601	1.44981	5	2	6	7	1.11616	-0.235307	0.00246365	1.35147	PI42C_HUMAN Phosphatidylinositol 5-phosphate 4-kinase type-2 gamma OS=Homo sapiens GN=PIP4K2C PE=1 SV=3
Q6P4I2	WDR73_HUMAN	-1.06647	-0.268578	-0.734614	-1.98919	-0.59954	-0.663329	-0.431388	-1.16318	-0.965029	0.321762	0.533446	0.570293	1	2	3	2	0.475167	-0.875702	0.00131213	1.35087	WDR73_HUMAN WD repeat-containing protein 73 OS=Homo sapiens GN=WDR73 PE=1 SV=1
Q86TB9	PATL1_HUMAN	-1.68118	-0.021049	-1.56639	-0.82207	0.378704	0.646625	-0.00368317	-0.245441	-0.200228	0.901864	0.858621	1.11261	6	6	5	6	0.957698	-0.390523	0.0193673	1.34822	PATL1_HUMAN Protein PAT1 homolog 1 OS=Homo sapiens GN=PATL1 PE=1 SV=2
P11274	BCR_HUMAN	-1.02129	-0.0497953	0.172751	-0.550796	-0.689806	-0.968352	-0.257519	-0.695804	-0.33669	1.08938	0.788931	0.695583	6	3	7	4	0.857964	-0.488589	0.000295869	1.34655	BCR_HUMAN Breakpoint cluster region protein OS=Homo sapiens GN=BCR PE=1 SV=2
Q13263	TIF1B_HUMAN	-1.11743	-0.125367	-1.82605	-1.74672	0.109653	-0.177077	-0.227736	-0.566452	-0.348356	0.708592	0.342182	0.979154	39	29	35	37	0.676643	-0.669505	0.0120679	1.34615	TIF1B_HUMAN Transcription intermediary factor 1-beta OS=Homo sapiens GN=TRIM28 PE=1 SV=5
Q14CZ7	FAKD3_HUMAN	-0.701935	-1.22928	-1.42175	-2.19697	0.160577	-0.00311157	-0.200768	-1.19975	0.0806356	0.331261	0.705704	0.761793	6	3	3	2	0.599586	-0.745817	0.0212174	1.3454	FAKD3_HUMAN FAST kinase domain-containing protein 3, mitochondrial OS=Homo sapiens GN=FASTKD3 PE=1 SV=2
Q9NUW8	TYDP1_HUMAN	-0.735652	0.429086	-1.5693	-2.12289	-0.486875	-0.13002	-0.492332	-0.397449	-0.513924	0.802086	0.74066	0.485786	1	2	5	2	0.676177	-0.668818	0.014272	1.345	TYDP1_HUMAN Tyrosyl-DNA phosphodiesterase 1 OS=Homo sapiens GN=TDP1 PE=1 SV=2
Q96CG3	TIFA_HUMAN	-2.3877	-0.08375	-0.418372	-0.973657	-0.173375	-0.294712	0.0487312	-0.0825445	-0.198988	0.648723	0.680547	1.18375	1	2	1	1	0.837674	-0.507152	0.016026	1.34483	TIFA_HUMAN TRAF-interacting protein with FHA domain-containing protein A OS=Homo sapiens GN=TIFA PE=1 SV=1
O14908	GIPC1_HUMAN	-1.46394	0.257903	0.272284	-1.58403	0.395499	-0.31276	-0.517855	-0.814912	-0.384301	0.568327	0.635125	1.44592	14	8	12	12	0.883124	-0.461345	0.0146557	1.34447	GIPC1_HUMAN PDZ domain-containing protein GIPC1 OS=Homo sapiens GN=GIPC1 PE=1 SV=2
O00418	EF2K_HUMAN	-0.63424	-0.0112381	-1.16045	0.660489	0.606461	0.321479	0.0998341	0.0580834	0.357994	1.01131	1.15965	1.95463	9	4	5	8	1.3752	0.033157	0.00569895	1.34204	EF2K_HUMAN Eukaryotic elongation factor 2 kinase OS=Homo sapiens GN=EEF2K PE=1 SV=2
Q6PIW4	FIGL1_HUMAN	-1.33776	-0.37496	-1.23529	-0.231694	0.47268	0.225789	0.924405	0.498714	0.132504	1.34238	1.25072	1.12273	3	6	4	4	1.23861	-0.102846	0.0159958	1.34146	FIGL1_HUMAN Fidgetin-like protein 1 OS=Homo sapiens GN=FIGNL1 PE=1 SV=2
P05161	ISG15_HUMAN	-2.82596	-0.135909	-0.351179	-1.88692	-0.550722	-1.22886	-0.707726	-0.754772	-0.971113	0.348149	-0.0196208	0.556386	4	6	7	7	0.294971	-1.04591	0.0250806	1.34088	ISG15_HUMAN Ubiquitin-like protein ISG15 OS=Homo sapiens GN=ISG15 PE=1 SV=5
Q6MZP7	LIN54_HUMAN	-0.558297	-0.127937	-1.35033	-1.28897	-0.338398	0.276912	1.0144	0.935944	1.31302	1.32407	1.04952	1.60738	4	7	1	2	1.32699	-0.0137403	0.0458627	1.34073	LIN54_HUMAN Protein lin-54 homolog OS=Homo sapiens GN=LIN54 PE=1 SV=3
Q15643	TRIPB_HUMAN	-1.32342	-0.108595	0.307992	0.267205	-0.165266	-0.536003	-0.748522	-0.927426	-0.680652	0.802325	0.610348	1.30442	30	20	22	16	0.905698	-0.434966	0.00304319	1.34066	TRIPB_HUMAN Thyroid receptor-interacting protein 11 OS=Homo sapiens GN=TRIP11 PE=1 SV=3
P25490	TYY1_HUMAN	-0.827666	0.906132	-0.453734	1.31881	1.27209	1.56936	1.77495	1.77447	1.32793	2.3396	2.33542	2.23147	11	5	8	6	2.30216	0.962482	0.0401164	1.33968	TYY1_HUMAN Transcriptional repressor protein YY1 OS=Homo sapiens GN=YY1 PE=1 SV=2
Q9HCD6	TANC2_HUMAN	-1.45922	-0.165892	1.54161	0.308113	0.0859834	-0.110075	0.137279	-0.293801	-0.187645	1.45128	1.32831	1.18509	17	8	11	12	1.32156	-0.0159599	0.0161244	1.33752	TANC2_HUMAN Protein TANC2 OS=Homo sapiens GN=TANC2 PE=1 SV=3
P39748	FEN1_HUMAN	0.0576319	-1.22551	-0.313897	-1.27388	0.509605	0.240989	-0.21714	0.204418	-0.00373287	0.916934	0.896772	1.52371	24	21	15	23	1.11247	-0.224613	0.00651421	1.33708	FEN1_HUMAN Flap endonuclease 1 OS=Homo sapiens GN=FEN1 PE=1 SV=1
P42773	CDN2C_HUMAN	-1.35035	0.786088	-0.602031	-0.0610576	-0.479296	-0.516949	-0.402886	-0.321823	-0.318516	0.94468	0.455467	1.51299	6	2	4	4	0.971045	-0.36298	0.0046469	1.33402	CDN2C_HUMAN Cyclin-dependent kinase 4 inhibitor C OS=Homo sapiens GN=CDKN2C PE=1 SV=1
Q6P2H3	CEP85_HUMAN	-2.20693	0.24301	0.470522	0.5863	-0.13651	0.104759	0.838128	0.192913	1.08682	1.38926	1.40911	1.59514	10	4	10	6	1.46451	0.131001	0.0414473	1.33351	CEP85_HUMAN Centrosomal protein of 85 kDa OS=Homo sapiens GN=CEP85 PE=1 SV=1
P78347	GTF2I_HUMAN	-1.77537	-0.0560763	-0.568961	-0.318466	1.07219	0.788926	0.913159	0.929511	0.87188	1.51703	1.43443	1.65878	57	40	38	46	1.53675	0.20631	0.0433851	1.33044	GTF2I_HUMAN General transcription factor II-I OS=Homo sapiens GN=GTF2I PE=1 SV=2
O75663	TIPRL_HUMAN	1.05292	-1.12688	0.0324787	-0.532884	-1.09945	-0.963651	-0.9254	-1.15257	-0.966916	0.666482	0.506614	0.916481	7	2	10	8	0.696525	-0.631373	0.0134216	1.3279	TIPRL_HUMAN TIP41-like protein OS=Homo sapiens GN=TIPRL PE=1 SV=2
O95229	ZWINT_HUMAN	-1.445	0.0915796	-0.250872	-1.11932	0.543909	0.381884	1.02397	0.270178	0.97057	1.0781	1.31371	1.74473	4	3	5	2	1.37885	0.0518776	0.0291631	1.32697	ZWINT_HUMAN ZW10 interactor OS=Homo sapiens GN=ZWINT PE=1 SV=2
Q9HBG6	IF122_HUMAN	-1.45418	-0.793363	-0.0567465	-0.0747735	-0.037998	-0.354443	-0.376449	-0.0239215	-0.317187	1.01873	0.553091	1.2383	10	7	7	3	0.936706	-0.387674	0.00128318	1.32438	IF122_HUMAN Intraflagellar transport protein 122 homolog OS=Homo sapiens GN=IFT122 PE=1 SV=2
Q8N6R0	MET13_HUMAN	-1.38904	-0.982545	-0.919886	-0.401351	0.20913	0.131682	-0.092829	-0.0117701	0.109504	0.843448	0.788457	1.22395	13	13	13	10	0.951952	-0.371901	0.00398415	1.32385	MET13_HUMAN Methyltransferase-like protein 13 OS=Homo sapiens GN=METTL13 PE=1 SV=1
Q13424	SNTA1_HUMAN	-2.08182	-2.04065	-2.28027	-0.831368	-1.12859	-1.10765	-2.00768	-1.36191	-1.71833	-0.74802	-0.592417	0.454976	5	3	2	2	-0.295154	-1.61759	0.00484138	1.32243	SNTA1_HUMAN Alpha-1-syntrophin OS=Homo sapiens GN=SNTA1 PE=1 SV=1
Q8IU81	I2BP1_HUMAN	-1.49704	-1.11069	-0.140717	-0.720798	-0.0356676	-0.130967	-0.0909449	-0.142598	-0.294116	0.545815	0.678433	1.35398	10	10	9	12	0.85941	-0.462616	0.00300402	1.32203	I2BP1_HUMAN Interferon regulatory factor 2-binding protein 1 OS=Homo sapiens GN=IRF2BP1 PE=1 SV=1
P57678	GEMI4_HUMAN	-1.43287	-0.744909	0.356399	-0.832319	0.378876	0.545076	0.322873	0.215375	0.417544	1.36207	1.11377	1.23049	26	14	16	16	1.23545	-0.0859949	0.0117592	1.32144	GEMI4_HUMAN Gem-associated protein 4 OS=Homo sapiens GN=GEMIN4 PE=1 SV=2
Q9BTE3	MCMBP_HUMAN	0.306219	-1.16858	0.306512	-0.553268	-1.05167	-0.833047	-0.957057	-1.45598	-0.932835	0.681422	0.376461	0.788523	17	13	15	16	0.615469	-0.704412	0.00568114	1.31988	MCMBP_HUMAN Mini-chromosome maintenance complex-binding protein OS=Homo sapiens GN=MCMBP PE=1 SV=2
Q15742	NAB2_HUMAN	-1.67033	0.0165775	-0.884551	0.672801	0.580086	0.103941	-0.268921	-0.488356	0.514007	0.647609	1.11425	1.71611	3	4	2	2	1.15932	-0.158305	0.0217139	1.31763	NAB2_HUMAN NGFI-A-binding protein 2 OS=Homo sapiens GN=NAB2 PE=1 SV=1
Q8TDB6	DTX3L_HUMAN	-1.74962	-0.0803617	-0.397424	-0.11548	1.07205	0.551706	0.719189	0.864812	0.807394	1.25281	1.62948	1.62254	14	7	10	8	1.50161	0.185808	0.0331774	1.3158	DTX3L_HUMAN E3 ubiquitin-protein ligase DTX3L OS=Homo sapiens GN=DTX3L PE=1 SV=1
Q13177	PAK2_HUMAN	0.377149	-0.998127	-0.08754	-0.758483	-0.382441	-0.747854	-1.25589	-1.06378	-1.18716	0.654253	0.416882	0.83353	22	12	16	13	0.634888	-0.678236	0.00275138	1.31312	PAK2_HUMAN Serine/threonine-protein kinase PAK 2 OS=Homo sapiens GN=PAK2 PE=1 SV=3
O43264	ZW10_HUMAN	-1.31893	-1.00906	-1.59648	-1.54529	-0.615205	-0.985955	-1.16969	-1.61124	-1.58687	-0.0130591	0.0288182	0.108442	14	14	8	7	0.0414004	-1.27097	9.69207e-05	1.31237	ZW10_HUMAN Centromere/kinetochore protein zw10 homolog OS=Homo sapiens GN=ZW10 PE=1 SV=3
Q14166	TTL12_HUMAN	-0.292684	-1.6076	-1.60999	-1.56358	-0.851439	-1.09431	-1.65388	-1.80215	-1.95137	0.0789247	-0.433794	0.149027	16	14	21	18	-0.068614	-1.38078	0.00266354	1.31216	TTL12_HUMAN Tubulin--tyrosine ligase-like protein 12 OS=Homo sapiens GN=TTLL12 PE=1 SV=2
Q8TD19	NEK9_HUMAN	-1.08048	0.162146	-0.989965	-1.96378	-0.304916	-0.545561	-0.768083	-1.07455	-0.755664	0.423044	0.506863	0.561993	3	5	5	5	0.4973	-0.813428	0.00396617	1.31073	NEK9_HUMAN Serine/threonine-protein kinase Nek9 OS=Homo sapiens GN=NEK9 PE=1 SV=2
Q7Z4Q2	HEAT3_HUMAN	-0.146156	-0.962052	0.145946	-0.957546	-0.0596216	-0.26159	-0.833878	-0.839303	-0.835943	0.586905	0.464346	1.28609	8	9	5	6	0.779114	-0.527794	0.00123723	1.30691	HEAT3_HUMAN HEAT repeat-containing protein 3 OS=Homo sapiens GN=HEATR3 PE=1 SV=2
Q5VYS8	TUT7_HUMAN	-0.426446	0.653724	1.45282	0.0378566	0.636377	0.113103	0.107403	0.0270697	0.438333	1.48904	1.72694	1.70868	7	7	5	5	1.64155	0.337805	0.00238867	1.30375	TUT7_HUMAN Terminal uridylyltransferase 7 OS=Homo sapiens GN=ZCCHC6 PE=1 SV=1
Q7L7X3	TAOK1_HUMAN	0.047009	-0.777298	2.34566	1.99048	0.426338	1.10601	1.08698	1.23045	1.41776	2.38702	2.16504	2.31323	4	5	5	5	2.28843	0.985933	0.047183	1.30249	TAOK1_HUMAN Serine/threonine-protein kinase TAO1 OS=Homo sapiens GN=TAOK1 PE=1 SV=1
Q63ZY3	KANK2_HUMAN	-0.838257	1.18311	-0.320248	0.0391415	0.519116	0.339119	-0.21909	-0.433851	0.195122	1.22118	0.98148	1.84115	20	13	19	23	1.34793	0.0515732	0.00655988	1.29636	KANK2_HUMAN KN motif and ankyrin repeat domain-containing protein 2 OS=Homo sapiens GN=KANK2 PE=1 SV=1
Q9Y6K9	NEMO_HUMAN	-1.78966	0.723914	1.30896	-1.24681	-0.0790224	-0.0467843	0.395712	-0.388702	0.258288	1.26715	0.869825	1.45969	6	4	8	10	1.19889	-0.0960126	0.0484682	1.2949	NEMO_HUMAN NF-kappa-B essential modulator OS=Homo sapiens GN=IKBKG PE=1 SV=2
Q6NXT1	ANR54_HUMAN	0.0245358	-0.169679	1.22682	0.304289	-0.348814	-0.651303	0.0678143	-0.622912	0.313873	1.08871	1.24122	1.5995	1	3	1	2	1.30981	0.0160697	0.00433223	1.29374	ANR54_HUMAN Ankyrin repeat domain-containing protein 54 OS=Homo sapiens GN=ANKRD54 PE=1 SV=2
P21359	NF1_HUMAN	-1.2623	-0.836495	-1.9127	-0.51617	-0.0649787	-0.417667	0.0843526	0.358614	0.574725	0.805033	0.686068	1.05659	12	10	10	3	0.849231	-0.443624	0.022355	1.29285	NF1_HUMAN Neurofibromin OS=Homo sapiens GN=NF1 PE=1 SV=2
Q9Y692	GMEB1_HUMAN	-1.48398	0.849788	-0.378006	-1.13757	-0.341144	-0.914341	-0.430607	-0.775577	-0.805178	0.385325	0.594912	1.0874	5	3	2	3	0.689214	-0.601846	0.0101079	1.29106	GMEB1_HUMAN Glucocorticoid modulatory element-binding protein 1 OS=Homo sapiens GN=GMEB1 PE=1 SV=2
Q9H0J9	PAR12_HUMAN	-0.599021	-0.383028	-0.902235	-0.184732	1.45452	0.728076	1.319	0.947489	1.17953	1.74336	1.79224	1.519	8	3	2	8	1.68487	0.395511	0.0393182	1.28936	PAR12_HUMAN Poly [ADP-ribose] polymerase 12 OS=Homo sapiens GN=PARP12 PE=1 SV=1
P42694	HELZ_HUMAN	-1.08736	-0.0643176	-0.268795	-0.810784	0.265593	0.91582	0.337418	0.507603	0.595068	1.35899	1.33496	1.30277	11	9	7	5	1.33224	0.0433605	0.00870011	1.28888	HELZ_HUMAN Probable helicase with zinc finger domain OS=Homo sapiens GN=HELZ PE=1 SV=2
P86790	CCZ1B_HUMAN	-1.39104	-1.27126	-0.367644	0.0481439	-0.299065	-0.729309	-0.378648	-0.236691	-0.253575	0.780901	0.513869	0.938407	6	9	6	4	0.744392	-0.542121	0.00157879	1.28651	CCZ1B_HUMAN Vacuolar fusion protein CCZ1 homolog B OS=Homo sapiens GN=CCZ1B PE=1 SV=1
P46734	MP2K3_HUMAN	-1.74576	-0.0824312	0.652007	-0.705257	0.73603	0.339164	0.433644	-0.0723824	0.148638	1.26666	1.28227	1.21102	8	10	2	9	1.25332	-0.0329275	0.0196977	1.28624	MP2K3_HUMAN Dual specificity mitogen-activated protein kinase kinase 3 OS=Homo sapiens GN=MAP2K3 PE=1 SV=2
O94804	STK10_HUMAN	-1.13758	0.2141	-0.968655	0.555675	0.350631	0.379119	0.0368123	-0.250825	-0.0313828	1.14461	1.03681	1.39312	8	3	9	4	1.19151	-0.0946778	0.00501586	1.28619	STK10_HUMAN Serine/threonine-protein kinase 10 OS=Homo sapiens GN=STK10 PE=1 SV=1
Q9H981	ARP8_HUMAN	-0.13951	0.372731	-0.359789	0.0354756	1.75744	1.68328	1.52404	0.889307	0.946846	2.30019	1.92614	1.86652	9	7	3	7	2.03095	0.745536	0.0246838	1.28541	ARP8_HUMAN Actin-related protein 8 OS=Homo sapiens GN=ACTR8 PE=1 SV=2
Q13049	TRI32_HUMAN	-1.32121	-0.623397	-0.132302	-0.670565	0.285043	0.185462	0.90635	0.71648	0.832588	1.34403	1.25625	1.3121	8	10	7	5	1.30413	0.019828	0.0189068	1.2843	TRI32_HUMAN E3 ubiquitin-protein ligase TRIM32 OS=Homo sapiens GN=TRIM32 PE=1 SV=2
Q9GZS3	WDR61_HUMAN	-1.69902	-0.272895	-2.4405	-1.57083	0.13433	-0.223074	-0.392813	-0.319896	-0.233485	0.347247	0.390155	0.774808	12	12	6	12	0.50407	-0.779799	0.0368768	1.28387	WDR61_HUMAN WD repeat-containing protein 61 OS=Homo sapiens GN=WDR61 PE=1 SV=1
Q9H3R5	CENPH_HUMAN	-0.700471	0.646773	0.5229	-0.614388	1.12889	1.39807	1.07738	0.641009	1.10969	1.86499	1.74379	1.97441	10	3	6	5	1.86106	0.578872	0.0177023	1.28219	CENPH_HUMAN Centromere protein H OS=Homo sapiens GN=CENPH PE=1 SV=1
Q96RT1	ERBIN_HUMAN	-0.220694	-0.385517	-2.05419	0.0213583	-0.350062	-0.204609	-0.341851	-0.0114113	-0.155817	0.774174	0.814508	1.02358	17	12	15	12	0.870753	-0.411422	0.00698939	1.28217	ERBIN_HUMAN Erbin OS=Homo sapiens GN=ERBIN PE=1 SV=2
O75030	MITF_HUMAN	-0.382822	0.457323	-0.341026	-0.225906	0.119279	0.884223	1.07734	1.13214	1.10562	1.6982	1.65503	1.76732	6	1	1	5	1.70685	0.42513	0.00781391	1.28172	MITF_HUMAN Microphthalmia-associated transcription factor OS=Homo sapiens GN=MITF PE=1 SV=2
Q96HA7	TONSL_HUMAN	-0.752975	0.35646	-0.0430697	1.03932	0.614333	0.449278	0.0312525	-0.339277	0.42911	1.51121	1.15224	1.77373	11	10	6	7	1.47906	0.198271	0.00323801	1.28079	TONSL_HUMAN Tonsoku-like protein OS=Homo sapiens GN=TONSL PE=1 SV=2
Q93062	RBPMS_HUMAN	-1.4731	-0.280306	-1.07512	0.60252	-0.576866	-0.371973	0.0736556	0.00463111	-0.203318	1.06784	0.95622	0.715428	3	2	3	1	0.913163	-0.366653	0.00648535	1.27982	RBPMS_HUMAN RNA-binding protein with multiple splicing OS=Homo sapiens GN=RBPMS PE=1 SV=1
Q9NVG8	TBC13_HUMAN	0.0940202	-1.74139	-1.28311	-2.14287	-0.851524	-1.1295	-2.5359	-2.11871	-2.0758	-0.299034	-0.35304	-0.110355	5	7	7	2	-0.254143	-1.53164	0.0264503	1.2775	TBC13_HUMAN TBC1 domain family member 13 OS=Homo sapiens GN=TBC1D13 PE=1 SV=3
Q9NSI2	F207A_HUMAN	0.443741	0.571179	-0.525146	-0.486433	0.384542	1.1539	0.365117	0.559988	-0.1046	1.58456	1.586	1.44925	11	5	6	7	1.53994	0.262476	0.00277394	1.27746	F207A_HUMAN Protein FAM207A OS=Homo sapiens GN=FAM207A PE=1 SV=2
Q9NVN8	GNL3L_HUMAN	-0.781577	0.525192	0.359867	-0.175258	1.44812	0.821691	1.34675	0.896233	0.764922	2.04256	2.16019	1.36223	21	9	12	8	1.85499	0.578438	0.0160259	1.27655	GNL3L_HUMAN Guanine nucleotide-binding protein-like 3-like protein OS=Homo sapiens GN=GNL3L PE=1 SV=1
Q9UNQ2	DIM1_HUMAN	-0.566616	-0.831354	0.212814	-0.939327	1.61121	0.731632	0.958207	0.508362	0.414319	1.59901	1.5252	1.3897	17	9	10	11	1.50464	0.23325	0.0329983	1.27139	DIM1_HUMAN Probable dimethyladenosine transferase OS=Homo sapiens GN=DIMT1 PE=1 SV=1
P27448	MARK3_HUMAN	-0.892901	-0.506279	1.60369	-0.413849	0.736848	0.549289	0.623054	0.00992673	0.648074	1.48488	1.39629	1.69483	12	6	8	5	1.52534	0.261984	0.0218203	1.26335	MARK3_HUMAN MAP/microtubule affinity-regulating kinase 3 OS=Homo sapiens GN=MARK3 PE=1 SV=4
Q5H9R7	PP6R3_HUMAN	-1.11023	-0.478421	0.413724	-1.11942	-0.615952	-0.430457	0.114266	-0.386901	0.120144	0.797086	0.750838	1.07578	15	17	19	19	0.874569	-0.388139	0.0028623	1.26271	PP6R3_HUMAN Serine/threonine-protein phosphatase 6 regulatory subunit 3 OS=Homo sapiens GN=PPP6R3 PE=1 SV=2
Q05655	KPCD_HUMAN	-1.0952	-0.49404	0.31062	-0.916671	-0.105463	-0.697497	-0.441263	-0.925348	-0.83064	0.504776	0.518825	1.02594	6	8	9	4	0.683182	-0.577278	0.00121346	1.26046	KPCD_HUMAN Protein kinase C delta type OS=Homo sapiens GN=PRKCD PE=1 SV=2
Q92805	GOGA1_HUMAN	-2.1961	-0.255099	0.528748	-0.238071	-0.0671552	-0.0868424	-0.13226	-1.30073	-0.527484	0.695578	0.68775	0.96823	17	10	12	8	0.783853	-0.474999	0.0261529	1.25885	GOGA1_HUMAN Golgin subfamily A member 1 OS=Homo sapiens GN=GOLGA1 PE=1 SV=3
Q5GLZ8	HERC4_HUMAN	-1.9401	-2.01606	-1.01909	0.588797	-0.249485	-0.300437	-1.04839	-1.87338	-1.45546	0.195735	0.168274	0.30324	4	7	2	3	0.222416	-1.03485	0.0409585	1.25726	HERC4_HUMAN Probable E3 ubiquitin-protein ligase HERC4 OS=Homo sapiens GN=HERC4 PE=1 SV=1
Q9UJC3	HOOK1_HUMAN	0.38806	-0.420701	0.214777	-0.978669	-0.284946	-0.0445187	-1.03037	-0.75579	-1.2222	0.99239	0.616139	0.781909	4	3	5	2	0.796812	-0.459372	0.00470958	1.25618	HOOK1_HUMAN Protein Hook homolog 1 OS=Homo sapiens GN=HOOK1 PE=1 SV=2
Q3B7T1	EDRF1_HUMAN	-0.444296	-1.56531	0.356367	-1.32168	-0.355916	-0.613915	-0.527654	-1.30206	-0.696364	0.188474	0.735159	0.686089	3	7	4	1	0.536574	-0.718981	0.00643488	1.25555	EDRF1_HUMAN Erythroid differentiation-related factor 1 OS=Homo sapiens GN=EDRF1 PE=1 SV=1
O75592	MYCB2_HUMAN	-0.654729	0.0492091	-0.448239	-0.802152	1.23354	0.816789	0.232185	0.531229	0.788538	1.3205	1.44722	1.5786	32	25	18	11	1.44877	0.194041	0.0149529	1.25473	MYCB2_HUMAN E3 ubiquitin-protein ligase MYCBP2 OS=Homo sapiens GN=MYCBP2 PE=1 SV=3
Q9BT25	HAUS8_HUMAN	0.366312	0.545354	-0.149765	0.916837	-0.0195924	-0.140179	-0.46327	-0.813559	-1.07367	1.28463	0.80313	1.39434	2	2	3	3	1.1607	-0.0923921	0.00960135	1.25309	HAUS8_HUMAN HAUS augmin-like complex subunit 8 OS=Homo sapiens GN=HAUS8 PE=1 SV=3
O60343	TBCD4_HUMAN	0.0516952	-0.132272	-0.539885	-1.48181	-0.0938879	-0.526055	-1.0651	-0.88951	-0.344957	0.664623	0.620573	0.796077	8	9	13	11	0.693758	-0.557975	0.00199698	1.25173	TBCD4_HUMAN TBC1 domain family member 4 OS=Homo sapiens GN=TBC1D4 PE=1 SV=2
O95819	M4K4_HUMAN	-0.928285	-0.499598	0.471211	-0.134389	0.0771402	0.155249	-0.0326188	-0.431346	0.100209	0.946568	0.986932	1.41382	11	8	10	6	1.11577	-0.135825	0.000752784	1.2516	M4K4_HUMAN Mitogen-activated protein kinase kinase kinase kinase 4 OS=Homo sapiens GN=MAP4K4 PE=1 SV=2
P62987	RL40_HUMAN	-1.12044	1.18069	1.61821	-0.0499645	0.956959	1.31971	0.608607	0.700485	0.185099	1.95076	1.78209	1.81849	14	8	8	8	1.85045	0.599929	0.0310899	1.25052	RL40_HUMAN Ubiquitin-60S ribosomal protein L40 OS=Homo sapiens GN=UBA52 PE=1 SV=2
P49770	EI2BB_HUMAN	-0.588548	-1.74334	0.44217	-1.65739	-0.190775	-0.772577	-1.42968	-1.55003	-1.32668	-0.0381831	-0.0142042	0.859893	9	3	6	11	0.269169	-0.97965	0.0249525	1.24882	EI2BB_HUMAN Translation initiation factor eIF-2B subunit beta OS=Homo sapiens GN=EIF2B2 PE=1 SV=3
P32121	ARRB2_HUMAN	-0.856314	0.362438	-0.115695	0.966096	1.36992	1.1387	0.589083	-0.0775944	0.249747	1.86243	1.87928	1.20107	5	2	1	2	1.64759	0.40293	0.0167303	1.24466	ARRB2_HUMAN Beta-arrestin-2 OS=Homo sapiens GN=ARRB2 PE=1 SV=2
Q9NVH2	INT7_HUMAN	-1.65053	-0.62391	-0.879332	-0.773262	0.718793	0.871882	0.5973	0.376867	0.600908	1.10256	1.08629	1.28636	12	16	7	8	1.15841	-0.0845868	0.0443885	1.24299	INT7_HUMAN Integrator complex subunit 7 OS=Homo sapiens GN=INTS7 PE=1 SV=1
Q86UA1	PRP39_HUMAN	-1.23883	-0.394728	0.140925	0.489317	-0.000910494	-0.378021	0.165151	-1.21206	-0.278088	1.1508	0.598145	1.07664	9	2	4	2	0.941862	-0.300805	0.00694197	1.24267	PRP39_HUMAN Pre-mRNA-processing factor 39 OS=Homo sapiens GN=PRPF39 PE=1 SV=3
Q13627	DYR1A_HUMAN	-0.578064	0.908233	0.314756	-0.977166	0.938207	0.790086	0.737592	0.36703	0.626683	1.66809	1.66762	1.4308	6	5	5	6	1.58884	0.347484	0.0123594	1.24135	DYR1A_HUMAN Dual specificity tyrosine-phosphorylation-regulated kinase 1A OS=Homo sapiens GN=DYRK1A PE=1 SV=2
Q8IWZ3	ANKH1_HUMAN	-0.926917	-0.309459	-0.53486	-1.53235	-0.106901	-0.432568	0.0342556	0.0203587	-0.00375676	1.03692	0.45461	0.960443	16	13	12	12	0.817323	-0.421355	0.00348996	1.23868	ANKH1_HUMAN Ankyrin repeat and KH domain-containing protein 1 OS=Homo sapiens GN=ANKHD1 PE=1 SV=1
Q8WU10	PYRD1_HUMAN	-0.1575	0.87689	0.211394	-1.12049	-0.213046	-0.659206	-0.729248	-0.759157	-0.444383	1.05079	0.54417	1.11549	2	2	4	6	0.903483	-0.332749	0.00746527	1.23623	PYRD1_HUMAN Pyridine nucleotide-disulfide oxidoreductase domain-containing protein 1 OS=Homo sapiens GN=PYROXD1 PE=1 SV=1
Q15047	SETB1_HUMAN	0.450075	-0.174178	-1.43405	0.23033	0.190518	0.413859	0.646058	0.735108	0.783493	1.56509	1.41086	1.3397	4	7	4	3	1.43855	0.204579	0.0130294	1.23397	SETB1_HUMAN Histone-lysine N-methyltransferase SETDB1 OS=Homo sapiens GN=SETDB1 PE=1 SV=1
P52732	KIF11_HUMAN	-1.67824	-1.13272	-1.4633	-1.74249	-0.596285	-0.950628	-0.610118	-0.82767	-0.826175	0.122985	0.249066	0.0501993	26	14	21	13	0.14075	-1.09196	0.000875474	1.23271	KIF11_HUMAN Kinesin-like protein KIF11 OS=Homo sapiens GN=KIF11 PE=1 SV=2
Q96DH6	MSI2H_HUMAN	-1.81712	-0.518854	0.0338783	0.271806	0.358503	0.397673	0.696591	1.00667	0.47004	1.78453	0.907553	1.30515	2	4	5	6	1.33241	0.0999093	0.0375008	1.2325	MSI2H_HUMAN RNA-binding protein Musashi homolog 2 OS=Homo sapiens GN=MSI2 PE=1 SV=1
Q9Y6J9	TAF6L_HUMAN	-0.809947	-0.28877	-0.823533	-1.39126	0.877341	1.11412	-0.307749	-0.505634	-0.24536	1.00627	0.558999	1.3196	8	4	8	4	0.961623	-0.264532	0.0317557	1.22616	TAF6L_HUMAN TAF6-like RNA polymerase II p300/CBP-associated factor-associated factor 65 kDa subunit 6L OS=Homo sapiens GN=TAF6L PE=1 SV=1
Q9NSP4	CENPM_HUMAN	0.122599	-0.0972617	0.105371	-0.119767	0.772184	0.987689	0.688904	0.709253	0.662348	1.37855	1.72961	1.8471	2	2	3	4	1.65175	0.425702	0.000831465	1.22605	CENPM_HUMAN Centromere protein M OS=Homo sapiens GN=CENPM PE=1 SV=1
Q96JP5	ZFP91_HUMAN	-0.324951	1.17526	0.199786	-0.453991	-0.012508	-0.361537	0.492335	-0.183917	0.161919	1.43959	1.05389	1.41506	3	2	6	4	1.30285	0.0769324	0.00288956	1.22592	ZFP91_HUMAN E3 ubiquitin-protein ligase ZFP91 OS=Homo sapiens GN=ZFP91 PE=1 SV=1
P25789	PSA4_HUMAN	-1.41434	-2.94132	-1.109	-0.888563	-1.99656	-2.30666	-2.23314	-1.81799	-2.20392	-0.641922	-0.789797	-0.532002	13	8	11	13	-0.654574	-1.87905	0.0101974	1.22448	PSA4_HUMAN Proteasome subunit alpha type-4 OS=Homo sapiens GN=PSMA4 PE=1 SV=1
O60671	RAD1_HUMAN	-1.70145	-0.268971	-0.862088	0.795929	-0.924669	-0.687222	-0.114609	-0.618946	0.0521377	0.70846	0.523298	0.994944	4	1	2	3	0.742234	-0.481098	0.0167899	1.22333	RAD1_HUMAN Cell cycle checkpoint protein RAD1 OS=Homo sapiens GN=RAD1 PE=1 SV=1
Q99081	HTF4_HUMAN	-0.90551	0.625998	-0.447795	-0.722898	0.58244	0.42342	-0.116855	-0.152517	0.165714	1.19701	1.01098	1.27902	8	2	6	5	1.16234	-0.0608891	0.00443643	1.22323	HTF4_HUMAN Transcription factor 12 OS=Homo sapiens GN=TCF12 PE=1 SV=1
Q63HN8	RN213_HUMAN	-1.6661	-0.557369	-0.0237911	-0.846934	0.274686	0.112631	0.145824	-0.284556	0.13233	0.790153	0.713457	1.26119	23	33	23	14	0.921599	-0.301475	0.0101553	1.22307	RN213_HUMAN E3 ubiquitin-protein ligase RNF213 OS=Homo sapiens GN=RNF213 PE=1 SV=3
Q9BVC3	DCC1_HUMAN	0.685686	-0.329565	0.719121	-0.3528	0.896905	0.717616	0.106975	0.259913	0.16986	1.38591	1.1158	2.12393	5	4	1	2	1.54188	0.319301	0.00323819	1.22258	DCC1_HUMAN Sister chromatid cohesion protein DCC1 OS=Homo sapiens GN=DSCC1 PE=1 SV=2
O14907	TX1B3_HUMAN	-0.969237	-0.649464	-0.232779	-1.06708	-0.114117	0.190151	-0.746859	-0.881783	-0.628996	0.175388	0.521487	1.2705	2	1	4	3	0.655792	-0.566684	0.00240076	1.22248	TX1B3_HUMAN Tax1-binding protein 3 OS=Homo sapiens GN=TAX1BP3 PE=1 SV=2
Q9H6E5	STPAP_HUMAN	-0.552685	-0.656265	-0.250391	-0.450537	0.258632	-0.231966	-0.752881	-1.46825	-1.10009	1.03905	-0.414904	1.30686	5	6	8	1	0.64367	-0.57827	0.0136163	1.22194	STPAP_HUMAN Speckle targeted PIP5K1A-regulated poly(A) polymerase OS=Homo sapiens GN=TUT1 PE=1 SV=2
Q9H9A6	LRC40_HUMAN	0.0239704	-1.39079	-1.0439	-1.26175	-0.5721	-0.693059	-1.56468	-1.69005	-1.42936	-0.0559881	-0.0439296	0.552845	27	19	23	16	0.150976	-1.06908	0.005688	1.22006	LRC40_HUMAN Leucine-rich repeat-containing protein 40 OS=Homo sapiens GN=LRRC40 PE=1 SV=1
Q9HB07	MYG1_HUMAN	-2.0967	-2.28479	-1.06319	-2.89096	-1.65874	-1.49508	-0.802433	-0.722181	-0.837399	-0.346159	-0.377179	-0.235753	13	9	8	11	-0.319697	-1.53905	0.0230128	1.21936	MYG1_HUMAN UPF0160 protein MYG1, mitochondrial OS=Homo sapiens GN=C12orf10 PE=1 SV=2
P49959	MRE11_HUMAN	-2.18989	-0.306344	0.585029	-0.445692	0.571485	0.325515	0.313333	-0.0297141	0.290486	1.14528	0.943115	1.27158	21	19	19	22	1.11999	-0.0984217	0.0401804	1.21841	MRE11_HUMAN Double-strand break repair protein MRE11A OS=Homo sapiens GN=MRE11A PE=1 SV=3
Q8WWV3	RT4I1_HUMAN	-2.09007	-1.50531	-0.638305	-1.32992	-0.0324909	-0.686794	-0.793735	-0.633074	-0.85303	0.00126974	0.268909	0.528138	9	6	4	7	0.266106	-0.951415	0.00780385	1.21752	RT4I1_HUMAN Reticulon-4-interacting protein 1, mitochondrial OS=Homo sapiens GN=RTN4IP1 PE=1 SV=2
P07992	ERCC1_HUMAN	0.564535	-0.708044	-0.60558	-0.0490936	0.0922652	0.325545	0.59727	0.630602	0.736589	1.43631	1.32905	1.41294	3	3	3	4	1.39277	0.17601	0.00358672	1.21676	ERCC1_HUMAN DNA excision repair protein ERCC-1 OS=Homo sapiens GN=ERCC1 PE=1 SV=1
Q9NVP2	ASF1B_HUMAN	-0.035663	-0.312952	0.181714	-1.79948	0.0548392	0.206843	-0.604287	-0.567856	-0.725678	0.56813	0.646272	1.23231	2	3	2	3	0.815571	-0.40028	0.0111716	1.21585	ASF1B_HUMAN Histone chaperone ASF1B OS=Homo sapiens GN=ASF1B PE=1 SV=1
Q9UKK3	PARP4_HUMAN	0.481264	-1.68749	-1.2447	-1.35996	-0.642728	-0.503421	0.20988	-0.401597	-0.288554	0.484555	0.659132	0.688254	8	14	4	5	0.610647	-0.604143	0.0181309	1.21479	PARP4_HUMAN Poly [ADP-ribose] polymerase 4 OS=Homo sapiens GN=PARP4 PE=1 SV=3
Q9H0P0	5NT3A_HUMAN	-1.13275	-1.26913	-0.152855	0.810062	-0.207618	-0.960752	-1.01777	-0.725302	-1.12757	0.567836	0.457575	0.690051	14	9	11	9	0.57182	-0.642633	0.0133056	1.21445	5NT3A_HUMAN Cytosolic 5'-nucleotidase 3A OS=Homo sapiens GN=NT5C3A PE=1 SV=3
Q96BF6	NACC2_HUMAN	-0.809089	0.0994984	-1.32267	-0.598223	0.253661	-0.0228433	0.620545	0.151364	0.175	1.28275	0.952236	0.919934	5	4	1	1	1.05164	-0.161417	0.0086204	1.21306	NACC2_HUMAN Nucleus accumbens-associated protein 2 OS=Homo sapiens GN=NACC2 PE=1 SV=1
P12955	PEPD_HUMAN	-0.935114	-0.550356	-1.60739	0.634392	-2.03393	-2.02033	-1.53416	-1.4463	-1.38903	-0.169564	-0.0029861	0.175696	5	2	7	7	0.00104862	-1.20914	0.0364835	1.21018	PEPD_HUMAN Xaa-Pro dipeptidase OS=Homo sapiens GN=PEPD PE=1 SV=3
P27708	PYR1_HUMAN	-1.89006	0.0168945	-0.25624	0.192934	0.590672	0.0804479	0.0878302	-0.224878	0.209929	0.953199	0.893408	1.38637	65	63	46	54	1.07766	-0.132497	0.017912	1.21016	PYR1_HUMAN CAD protein OS=Homo sapiens GN=CAD PE=1 SV=3
P50750	CDK9_HUMAN	-0.732393	0.284396	0.404598	1.06541	0.73211	1.05058	1.00022	1.01954	1.13629	1.74822	1.81653	2.04971	10	5	5	9	1.87149	0.662306	0.00777914	1.20918	CDK9_HUMAN Cyclin-dependent kinase 9 OS=Homo sapiens GN=CDK9 PE=1 SV=3
O60229	KALRN_HUMAN	-1.37021	0.0525164	1.28691	-0.527441	0.387252	0.408692	0.0146526	-0.00471304	0.022323	1.49237	1.18505	1.03857	5	5	3	5	1.23866	0.0299982	0.0192156	1.20866	KALRN_HUMAN Kalirin OS=Homo sapiens GN=KALRN PE=1 SV=2
Q99728	BARD1_HUMAN	-0.7565	0.571009	-0.915774	-0.756808	1.30767	1.03076	0.657862	0.377457	0.846912	1.72772	1.31986	1.35878	5	5	2	1	1.46878	0.26251	0.0396467	1.20627	BARD1_HUMAN BRCA1-associated RING domain protein 1 OS=Homo sapiens GN=BARD1 PE=1 SV=2
O43318	M3K7_HUMAN	-0.864369	-1.28088	-1.2188	-1.90535	-0.0239471	-0.399714	-0.427397	-0.411672	-0.53224	0.249579	0.622898	0.390312	5	3	3	6	0.42093	-0.78493	0.00673856	1.20586	M3K7_HUMAN Mitogen-activated protein kinase kinase kinase 7 OS=Homo sapiens GN=MAP3K7 PE=1 SV=1
O94887	FARP2_HUMAN	-1.46257	-0.532602	-1.18335	1.01096	0.307801	-0.328868	-0.888159	-0.401113	-0.850036	0.831246	0.377337	0.96314	7	5	4	2	0.723907	-0.480882	0.0264511	1.20479	FARP2_HUMAN FERM, RhoGEF and pleckstrin domain-containing protein 2 OS=Homo sapiens GN=FARP2 PE=1 SV=3
Q5W0V3	F16B1_HUMAN	0.0596047	-1.86934	-1.93485	-1.87094	-0.21418	-0.410824	-0.692349	-0.857643	-0.541947	0.208806	0.297744	0.325402	3	8	4	5	0.277318	-0.92583	0.0257614	1.20315	F16B1_HUMAN Protein FAM160B1 OS=Homo sapiens GN=FAM160B1 PE=1 SV=1
P47712	PA24A_HUMAN	-1.45934	-0.644567	-0.0418654	-1.67577	-1.11394	-1.25367	-2.15543	-2.28925	-1.80613	-0.626143	-0.938128	1.02609	22	17	18	23	-0.179395	-1.38222	0.0470353	1.20282	PA24A_HUMAN Cytosolic phospholipase A2 OS=Homo sapiens GN=PLA2G4A PE=1 SV=2
Q6P1J9	CDC73_HUMAN	-1.08028	-0.868362	-0.73501	-2.13447	0.351525	0.434044	0.189937	0.0581659	0.118094	0.695003	0.691062	0.999692	26	13	24	24	0.795252	-0.407374	0.0414601	1.20263	CDC73_HUMAN Parafibromin OS=Homo sapiens GN=CDC73 PE=1 SV=1
O95630	STABP_HUMAN	-1.41522	0.982932	0.0860184	-0.623636	-0.144789	0.273662	0.0955647	0.15117	0.381236	1.18059	1.05247	1.30209	5	4	3	5	1.17839	-0.0236734	0.0138423	1.20206	STABP_HUMAN STAM-binding protein OS=Homo sapiens GN=STAMBP PE=1 SV=1
Q7RTW8	OTOAN_HUMAN	0.375844	1.22814	0.698608	-0.298442	1.51269	1.20748	1.83498	1.59626	1.74512	2.38574	2.12402	2.39125	1	1	1	1	2.30034	1.10008	0.018298	1.20026	OTOAN_HUMAN Otoancorin OS=Homo sapiens GN=OTOA PE=1 SV=1
O94888	UBXN7_HUMAN	-0.241604	-1.22627	-0.614517	-1.67905	-1.14239	-0.900678	-0.303104	-0.173754	-0.226334	0.328938	0.446525	0.652314	1	5	8	7	0.475926	-0.723078	0.00428981	1.199	UBXN7_HUMAN UBX domain-containing protein 7 OS=Homo sapiens GN=UBXN7 PE=1 SV=2
Q5T1M5	FKB15_HUMAN	-0.739575	-1.18271	-0.659417	-0.933097	-1.5342	-1.65534	-0.529697	-0.472858	-0.500333	0.26659	0.298552	0.286381	8	10	10	10	0.283841	-0.911914	0.00121251	1.19576	FKB15_HUMAN FK506-binding protein 15 OS=Homo sapiens GN=FKBP15 PE=1 SV=2
Q9H1A4	APC1_HUMAN	-1.37763	-0.435197	-0.655098	-1.55296	-0.0327184	-0.40776	0.262746	0.163895	0.27261	1.0167	0.654748	0.656591	13	13	15	8	0.776012	-0.418012	0.015481	1.19402	APC1_HUMAN Anaphase-promoting complex subunit 1 OS=Homo sapiens GN=ANAPC1 PE=1 SV=1
P49674	KC1E_HUMAN	1.14585	0.873231	-0.297767	-0.699188	1.29844	0.911977	1.1175	0.877857	1.00738	1.72727	1.91535	2.01299	11	7	4	7	1.8852	0.69281	0.0171301	1.19239	KC1E_HUMAN Casein kinase I isoform epsilon OS=Homo sapiens GN=CSNK1E PE=1 SV=1
Q8N752	KC1AL_HUMAN	-0.310866	1.17405	-0.680346	0.0227317	1.43596	1.05656	1.29458	1.48091	1.14067	2.10999	2.07759	1.59205	7	2	2	3	1.92654	0.734915	0.0379727	1.19163	KC1AL_HUMAN Casein kinase I isoform alpha-like OS=Homo sapiens GN=CSNK1A1L PE=2 SV=2
Q14240	IF4A2_HUMAN	-1.32993	-1.17711	-1.54974	-1.7204	-0.199918	-0.28534	-0.211066	-0.340727	-0.220016	0.318182	0.261899	0.650004	18	19	19	20	0.410028	-0.781582	0.0122694	1.19161	IF4A2_HUMAN Eukaryotic initiation factor 4A-II OS=Homo sapiens GN=EIF4A2 PE=1 SV=2
Q6PEV8	F199X_HUMAN	-0.35116	-0.37041	-1.42191	0.260413	0.270396	0.222071	0.349463	-0.0743355	0.164298	1.14202	1.24503	0.869352	3	3	1	1	1.08547	-0.105686	0.00570101	1.19115	F199X_HUMAN Protein FAM199X OS=Homo sapiens GN=FAM199X PE=1 SV=1
Q96AY4	TTC28_HUMAN	-1.31882	0.412338	-0.136386	-1.06545	0.137275	0.0736444	-0.157186	-0.285239	0.38556	1.04765	0.798241	1.07232	7	7	5	4	0.972739	-0.21714	0.00830991	1.18988	TTC28_HUMAN Tetratricopeptide repeat protein 28 OS=Homo sapiens GN=TTC28 PE=1 SV=4
Q9Y4F3	MARF1_HUMAN	-0.396306	-1.25624	0.435406	0.288233	-0.907133	-0.0592078	0.408926	0.721144	0.545611	0.98121	0.941532	1.57228	2	4	2	1	1.16501	-0.0243967	0.018833	1.1894	MARF1_HUMAN Meiosis arrest female protein 1 OS=Homo sapiens GN=KIAA0430 PE=1 SV=6
P07741	APT_HUMAN	-2.26227	-0.162175	-1.84532	-2.27611	-0.347342	-0.679427	-1.33551	-1.34471	-1.39599	-0.196391	-0.182485	0.0550648	6	8	6	7	-0.107937	-1.29432	0.0281583	1.18638	APT_HUMAN Adenine phosphoribosyltransferase OS=Homo sapiens GN=APRT PE=1 SV=2
Q969F9	HPS3_HUMAN	-0.299027	-0.255855	0.0831289	-0.514392	0.0122347	0.0461828	-0.0633269	0.584501	0.339524	1.12609	1.05003	1.35752	5	9	6	1	1.17788	-0.0074476	0.000173442	1.18533	HPS3_HUMAN Hermansky-Pudlak syndrome 3 protein OS=Homo sapiens GN=HPS3 PE=1 SV=1
P78344	IF4G2_HUMAN	-0.861854	-1.47888	-1.18429	-1.50617	0.0929567	0.117786	-0.146576	-0.0534322	-0.100217	0.405829	0.598761	0.841021	47	31	27	34	0.615204	-0.568963	0.0167659	1.18417	IF4G2_HUMAN Eukaryotic translation initiation factor 4 gamma 2 OS=Homo sapiens GN=EIF4G2 PE=1 SV=1
Q5HYK7	SH319_HUMAN	-0.45272	-0.751033	-1.39596	-0.989626	-0.311366	-0.562056	-0.151556	0.298727	-2.2393	0.359689	0.27325	0.728554	3	2	3	1	0.453831	-0.72832	0.0255829	1.18215	SH319_HUMAN SH3 domain-containing protein 19 OS=Homo sapiens GN=SH3D19 PE=1 SV=2
Q03426	KIME_HUMAN	-0.417274	-0.824444	-0.44674	-0.313985	0.898595	0.257613	-0.536697	-0.216063	0.139962	0.677098	0.645134	1.73436	9	6	5	6	1.01886	-0.162115	0.00825071	1.18098	KIME_HUMAN Mevalonate kinase OS=Homo sapiens GN=MVK PE=1 SV=1
Q9BY32	ITPA_HUMAN	-0.183332	-1.64911	-1.18597	0.217083	-1.218	-1.56147	-0.995819	-1.33352	-1.13365	-0.0472772	-0.0322601	0.604164	5	9	5	3	0.174876	-1.00487	0.0123091	1.17974	ITPA_HUMAN Inosine triphosphate pyrophosphatase OS=Homo sapiens GN=ITPA PE=1 SV=2
P11766	ADHX_HUMAN	-0.842479	-1.47852	0.00818724	-0.426804	-0.174366	-0.439325	-0.526677	-0.454613	-0.327553	0.507369	0.400419	1.07715	10	7	9	11	0.661646	-0.518016	0.0017188	1.17966	ADHX_HUMAN Alcohol dehydrogenase class-3 OS=Homo sapiens GN=ADH5 PE=1 SV=4
O96007	MOC2B_HUMAN	-0.623575	-0.336744	-1.37126	-0.0593985	-2.04245	-1.57334	-1.92942	-2.50031	-1.8042	-0.0331841	-0.46157	-0.0549814	3	1	4	4	-0.183245	-1.36008	0.0419161	1.17683	MOC2B_HUMAN Molybdopterin synthase catalytic subunit OS=Homo sapiens GN=MOCS2 PE=1 SV=1
Q86UE8	TLK2_HUMAN	-1.53963	-0.616524	0.149666	1.19454	-0.535167	-0.327952	0.361235	-0.0525814	0.455887	1.03571	1.00681	1.17421	4	2	5	6	1.07224	-0.10117	0.0301234	1.17341	TLK2_HUMAN Serine/threonine-protein kinase tousled-like 2 OS=Homo sapiens GN=TLK2 PE=1 SV=2
Q9Y4J8	DTNA_HUMAN	-0.752215	-0.960953	0.997229	-0.608529	0.126127	-0.285872	0.220144	0.597511	0.630241	1.19255	1.26758	1.044	2	2	4	3	1.16804	-0.00403525	0.0169704	1.17208	DTNA_HUMAN Dystrobrevin alpha OS=Homo sapiens GN=DTNA PE=1 SV=2
O00257	CBX4_HUMAN	-1.3728	0.795598	0.520151	-0.165861	1.53024	0.982136	0.792755	0.223469	0.826587	1.50351	1.75207	1.62707	10	2	5	5	1.62755	0.459141	0.0414477	1.16841	CBX4_HUMAN E3 SUMO-protein ligase CBX4 OS=Homo sapiens GN=CBX4 PE=1 SV=3
Q9UBI1	COMD3_HUMAN	-1.54999	-1.457	-0.680275	-0.874511	0.0637129	-0.432811	-1.36018	-1.06347	-1.15894	0.0848504	-0.00399622	0.58362	3	1	3	1	0.221491	-0.945941	0.00515753	1.16743	COMD3_HUMAN COMM domain-containing protein 3 OS=Homo sapiens GN=COMMD3 PE=1 SV=1
Q9UER7	DAXX_HUMAN	-1.15918	-0.282607	-0.852238	0.50841	0.966763	0.421673	-0.0924285	0.130845	0.60585	0.98877	0.983075	1.60458	6	6	4	4	1.19214	0.0274537	0.0220077	1.16469	DAXX_HUMAN Death domain-associated protein 6 OS=Homo sapiens GN=DAXX PE=1 SV=2
Q9BQ04	RBM4B_HUMAN	-1.2688	0.29211	1.34335	-0.367509	0.42111	0.836258	0.806376	0.840765	0.796862	1.55255	1.54783	1.60633	14	8	14	15	1.56891	0.411169	0.0336869	1.15774	RBM4B_HUMAN RNA-binding protein 4B OS=Homo sapiens GN=RBM4B PE=1 SV=1
Q6IBW4	CNDH2_HUMAN	-0.803562	-0.0925793	-1.49855	-1.96475	0.179684	-0.139035	0.270472	-0.0969073	-0.0502858	0.645049	0.23798	1.19067	7	8	9	7	0.691232	-0.466168	0.0397521	1.1574	CNDH2_HUMAN Condensin-2 complex subunit H2 OS=Homo sapiens GN=NCAPH2 PE=1 SV=1
Q8NHV4	NEDD1_HUMAN	-1.68572	-0.862326	0.803684	-1.3037	-0.649716	-0.723599	-0.597647	-0.876145	-0.748952	0.310288	0.36724	0.57911	2	4	4	7	0.418879	-0.738236	0.0171204	1.15712	NEDD1_HUMAN Protein NEDD1 OS=Homo sapiens GN=NEDD1 PE=1 SV=1
Q9NZL4	HPBP1_HUMAN	0.0802388	-1.32191	-0.924258	0.451406	-0.351652	-0.261324	-0.62881	-0.841389	-0.665254	0.197239	0.633401	1.15285	12	11	9	8	0.661163	-0.495884	0.00824423	1.15705	HPBP1_HUMAN Hsp70-binding protein 1 OS=Homo sapiens GN=HSPBP1 PE=1 SV=1
P30291	WEE1_HUMAN	-1.04276	-0.355254	-0.298559	0.325289	0.173287	-0.271107	0.528542	0.384263	0.706346	1.14649	1.11612	1.25294	4	2	3	1	1.17185	0.0166716	0.00569093	1.15518	WEE1_HUMAN Wee1-like protein kinase OS=Homo sapiens GN=WEE1 PE=1 SV=2
Q13506	NAB1_HUMAN	-0.905216	0.603093	-1.05706	-0.134472	-0.193477	-0.114149	0.861818	0.644989	0.44304	1.10382	1.0998	1.30772	4	7	3	6	1.17045	0.0165075	0.0179563	1.15394	NAB1_HUMAN NGFI-A-binding protein 1 OS=Homo sapiens GN=NAB1 PE=1 SV=2
Q7Z4S6	KI21A_HUMAN	-1.68537	-0.81648	-0.53903	-0.175425	-0.102623	-0.304423	-0.745721	-0.5508	-0.529457	0.343049	0.317308	0.984722	12	15	20	15	0.54836	-0.605481	0.00339993	1.15384	KI21A_HUMAN Kinesin-like protein KIF21A OS=Homo sapiens GN=KIF21A PE=1 SV=2
Q9P2L0	WDR35_HUMAN	0.251895	-0.435597	-1.69967	-1.12261	0.207246	0.376425	0.157291	1.02129	0.208382	1.08957	1.0505	0.976169	4	5	1	1	1.03875	-0.115039	0.0430887	1.15379	WDR35_HUMAN WD repeat-containing protein 35 OS=Homo sapiens GN=WDR35 PE=1 SV=3
Q5T5P2	SKT_HUMAN	-0.955293	-1.03175	0.3734	-0.398855	-0.0504553	0.346695	-0.306342	-0.402545	0.226082	1.09441	0.544488	1.08621	21	9	14	12	0.90837	-0.244341	0.00523155	1.15271	SKT_HUMAN Sickle tail protein homolog OS=Homo sapiens GN=KIAA1217 PE=1 SV=2
Q96EK7	F120B_HUMAN	0.453178	0.785773	-0.4318	-1.09181	0.239015	0.320161	-0.11365	0.117247	0.235769	1.11162	1.12117	1.39627	5	2	4	7	1.20969	0.0570977	0.00590695	1.15259	F120B_HUMAN Constitutive coactivator of peroxisome proliferator-activated receptor gamma OS=Homo sapiens GN=FAM120B PE=1 SV=1
P46939	UTRO_HUMAN	0.0807513	0.574615	-0.700994	-1.73771	0.211181	0.048829	-0.033537	0.186287	0.301794	0.81502	1.17017	1.11617	45	33	24	24	1.03379	-0.118754	0.0206721	1.15254	UTRO_HUMAN Utrophin OS=Homo sapiens GN=UTRN PE=1 SV=2
Q9NZJ0	DTL_HUMAN	-1.01394	-1.3481	0.324952	0.506275	0.242178	-0.248247	0.245042	0.44017	0.0788738	0.685603	1.13865	1.36703	2	1	5	2	1.06376	-0.0858657	0.0184255	1.14963	DTL_HUMAN Denticleless protein homolog OS=Homo sapiens GN=DTL PE=1 SV=3
Q9UP83	COG5_HUMAN	-1.10536	-0.466269	-2.67786	-0.970517	-0.605839	-0.729288	-0.284283	-0.711691	-0.542226	-0.0958748	0.321642	0.5204	11	11	9	6	0.248723	-0.899259	0.0247036	1.14798	COG5_HUMAN Conserved oligomeric Golgi complex subunit 5 OS=Homo sapiens GN=COG5 PE=1 SV=3
[truncated: 248 more rows]

## Sheet: Supplemental Table S3
Supplemental Table S3
UniProtKB Entry	UniProtKB Entry name	Exp. 1	Exp. 1	Exp. 2	Exp. 2	Exp. 3	Exp.3	Exp. 4	Exp. 4	Exp. 4	Exp. 3	Exp.3	Exp. 4	Exp. 1	Exp. 2	Exp. 3	Exp. 4	Zq average WA	Zq average C	p-value WA vs C	DZq (WA - C)	Description
[truncated: 917 more rows]

## Sheet: Supplemental Table S4
Supplemental Table S4
[truncated: 442 more rows]

[truncated: 11 more sheets: Supplemental Table S5, Supplemental Table S6, Supplemental Table S7, Supplemental Table S8, Supplemental Table S9, Supplemental Table S10, Supplemental Table S11, Supplemental Table S12, Supplemental Table S13, Supplemental table S14, Supplemental Table S15]
