# Supplementary material for: Disruption of Proteostasis by Natural Products and Synthetic Compounds That Induce Pervasive Unfolding of Proteins: Therapeutic Implications
Source: Pharmaceuticals (Basel). 2023 Apr 19;16(4):616. doi: 10.3390/ph16040616 (PMC10145903; doi:10.3390/ph16040616)
Supplement: Supplementary file 1 [file pharmaceuticals-16-00616-s001.zip › Table S16 revised.pdf]

**Table S16: Targeted PN components and proteins known to be ubiquitinated**

| PN system component                               | Commonly aggregating proteins                                                                                                                                                                                                                                                                                                         | Additional proteins caused to aggregate by WA                                                                                                                                                                                                                                                   | Additional proteins caused to aggregate by IHSF115                                                                                                                                                                                                                                                                                     | Additional proteins caused to aggregate by IHSF058                                                                                         | Proteins modified by IHSF058                                                                                                                                                                                                                                                                                                                                          |
|---------------------------------------------------|---------------------------------------------------------------------------------------------------------------------------------------------------------------------------------------------------------------------------------------------------------------------------------------------------------------------------------------|-------------------------------------------------------------------------------------------------------------------------------------------------------------------------------------------------------------------------------------------------------------------------------------------------|----------------------------------------------------------------------------------------------------------------------------------------------------------------------------------------------------------------------------------------------------------------------------------------------------------------------------------------|--------------------------------------------------------------------------------------------------------------------------------------------|-----------------------------------------------------------------------------------------------------------------------------------------------------------------------------------------------------------------------------------------------------------------------------------------------------------------------------------------------------------------------|
| Heat shock response, chaperones and co-chaperones | BAG3, CRYAB, DNJA1, DNJB6, HPBP1, HSF1, HSPB1, HSPB8, SACS, TBCE                                                                                                                                                                                                                                                                      | BAG5, DNJB1, DNJC2, DNJC7, HSP7E, PPID, PPIL2, TBCB, TBCD                                                                                                                                                                                                                                       | BAG1, BAG6, DNJB1, DNJC7, HS71L, HSP72, PFD5, PPID, TBCB, TBCC                                                                                                                                                                                                                                                                         | BAG1, BAG6                                                                                                                                 | BAG1, 3 and 5, DJC21, DNJC2, 7 and 9, HPBP1, HS74L, HS105, HSP74, HSP7E, HSPB8, PFD1,2 and 4-6, PPIH, PPIL2, TBCB, TBCD                                                                                                                                                                                                                                               |
| Proteasome                                        | PRS6A, PSA4, PSA5, PSDE                                                                                                                                                                                                                                                                                                               | ECM29, PCBP2, PRS6B, PRS7, PSB2, PSD10, PSD11, PSD12, PSD13, PSMD2, PSMD3, PSMD6, PSMD8, PSMG2                                                                                                                                                                                                  | A0A024RA52, DCA11, PCBP2, PRS4, 6B, 7 and 8, PSA1, 7 and 7L, PSB2, 3 and 7, PSD11-13, PSMD1, 2, 3 and 5-8, PSMF1, PSMG1, WDR26                                                                                                                                                                                                         | PSMF1                                                                                                                                      | ADRM1, PRS10, PSD11, PSME1, PSME2, PSMF1, PSMG1, PSMG2, WDR26                                                                                                                                                                                                                                                                                                         |
| Ubiquitin system                                  | ANC2, APC1, ARMC8, BRAP, CDC20, CDC73, CR025, DESI1, DTL, FBX7, FBX30, FXL12, HECD1, HERC4, HUWE1, KLHL11, LZTR1, MAEA, MKRN2, NED4L, NS1BP, NUB1, OTUD5, PLAP, RN213, RN220, SKP2, STALP, SUMO2, TRI16, TRI32, TRI37, TRI47, TS101, UB2Q1, UB2R1, UBE2C, UBP11, UBP13, UBP47, UBP48, UBXN1, UBXN6, UBXN7, UCHL3, UEVLD, VP37A, ZFP91 | APC5, APC7, ATG3, BABA1, BAP1, BRCC3, CDC16, CDC23, CDC27, CHIP, CIKS, CRBN, CTR9, FBX4, FXL18, HGS, ITCH, LTN1, NOSIP, OTUL, PIAS4, RN216, RNF14, RO52, SH3R1, TRAF2, TRI18, TRI25, TRI33, UB2D3, UB2G2, UBAC1, UBAP1, UBE3C, UBP3, UBP4, UBP15, UBR1, UCHL5, USP9X, USP9Y, VP37B, XIAP, ZN598 | APC5, APC7, ATG3, BABA1, BAP1, BARD1, BRCA1, BRE1A, BRE1B, CDC16, CDC23, CDC27, CHIP, CIKS, CTR9, DCAF8, DTX3L, ELOB, FBX4, HERC1, HGS, LTN1, MYCB2, NPL4, OTUL, RAD18, RO52, SH3R1, TIF1B, TRAF7, TRI25, TRI26, UB2D3, UB2E3, UB2G2, UBAC1, UBE3A, UBE3C, UBL4A, UBP5, UBP34, UBQL4, UBR1, UBR2, UBR5, UBR7, UCHL5, UFD1, VP37B, XIAP | BARD1, BRE1B, CBX4, CCAR2, DCAF8, DTX3L, ITCH, ISG15, MYCB2, NIPA, NPL4, PIAS1, RAD18, RL40, RN126, RNF14, STABP, TIF1B, TRAF2, UBP4, UBR2 | ARI1, ARMC8, ATG3, BRE1A and B, CCAR2, CDC20, 27 and 73, CHIP, FXL18, ISG15, LRSM1, NIPA, NOSIP, OTUB1, OTUD5, OTUL, RBP2, RNF25, RN114, RBX1, SH3R1, SUMO1, TIF1B, TRAF2, TRI16, 18, 25 and 33, TRIPC, TS101, UB2L3, UB2V1, UBA1, UBA6, UBAP1, UBE3A, 2S, 4B and 2I, UBP2L, 5, 7, 8, 10, 15, 19, 24, 47 and 48, UBR7, UBXN1, UCHL5, USP9X, VP37A, VP37B, XIAP, ZN598 |

|                                    |                                                                                                                                                                                                                              |                                                                                                                                                                                                                                                                   |                                                                                                                                                                                                                                                                                                                                                                                              |                                                                                                                                                                                         |                                                                                                                                                                                                                                                                                                                                                                                                                                                                                                                                                                                                                                                                                                                                                                                                                                                                                                         |
|------------------------------------|------------------------------------------------------------------------------------------------------------------------------------------------------------------------------------------------------------------------------|-------------------------------------------------------------------------------------------------------------------------------------------------------------------------------------------------------------------------------------------------------------------|----------------------------------------------------------------------------------------------------------------------------------------------------------------------------------------------------------------------------------------------------------------------------------------------------------------------------------------------------------------------------------------------|-----------------------------------------------------------------------------------------------------------------------------------------------------------------------------------------|---------------------------------------------------------------------------------------------------------------------------------------------------------------------------------------------------------------------------------------------------------------------------------------------------------------------------------------------------------------------------------------------------------------------------------------------------------------------------------------------------------------------------------------------------------------------------------------------------------------------------------------------------------------------------------------------------------------------------------------------------------------------------------------------------------------------------------------------------------------------------------------------------------|
| Proteins known to be ubiquitinated | AAPK1, APT, ARMC6, BRAP, BZW1, CDK1, CDK2, CND3, CSDE1, DNJA1, FACD2, HERC4, HSPB1, MAGD2, NUB1, OTUD5, PA24A, PCBP1, PCNA, PLAP, PRS6A, PSA4, PSA5, PSDE, RINI, SETB1, SND1, SPG20, TRI32, TTL12, UBXN1, UBXN7, UCHL3, VATA | AIMP2, ANM1, BOLA2, CDK4, COPA, COPE, DHB4, EHD2, ESYT1, FEN1, GEMI5, GFPT1, GUAA, IF5A1, IPO7, NRDC, PCBP2, PRS7, PSB2, PSMD2, PSMD3, RABX5, RIR1, SAR1A, SC31A, SERA, SGT1, SYEP, SYLC, TBB3, TRAD1, TRI25, TXNL1, TYSY, UBP15, UCHL5, USP9X, XPO1, XPOT, ZFY16 | ANM1, ARF4, ARPC4, BAG6, BOLA2, CD123, CK054, CNDP2, COPA, COPE, COPZ1, DFNA5, GEMI5, HS71L, IF4A1, IF5A1, IPO7, IQGA1, MCM3, MCM7, ML12A, MO4L1, MRE11, MYG1, NPL4, NRDC, NSUN2, PCBP2, PRDX2, PRS4, PRS7, PRS8, PSA7, PSB2, PSMD1, PSMD2, PSMD3, PSMD7, RAD18, SAR1A, SC31A, SGT1, SIN3A, SQSTM, SYLC, TBA1A, TBB3, TBB5, TIF1B, TRAD1, TRI25, TXNL1, UBP5, UCHL5, UCK2, UFD1, XPOT, ZN281 | ABCF2, BAG6, CBX4, CLH1, DYL1, FEN1, GUAA, HNRH2, HNRPF, IF4A1, MAX, MCM3, MCM7, MYG1, MRE11, NPL4, PABP1, PABP4, PMS2, PUR2, PYR1, RABX5, RAD18, RGAP1, RIR1, RNZ2, SERA, TIF1B, ZN281 | AAPK1, ACLY, ACOT9, ACTN4, ADRM1, AIMP2, AMPB, AP2A1, AP2B1, ARI1, ARP3, ATX2L, BOLA2, CYBP, CBX3, CCD50, CCNT1, CND3, COPA, COPB2, CSN3, CSDE1, DDB1, DDX21, DHOS, DHX9 and 36, DNMT1, DUT, DC112, EIF3A, 3B, 3C, 3E and 3I, ELAV1, ESYT1, EXOS7, FA98A, FERM2, FND3B, FSCN1, G3BP1 and 2, G6PD, GEMI5, GUAA, HAT1, HDAC1 and 2, HNRPF, HPRT, HS105, HSP74, IF2B, IF6, ILF3, ILEU, IPYR2, LANC1, MAT2B, MCM6, MDHC, MK01, MTA2, MTCH2, MYOF, NCBP1, NU155, NUCL, NUFP2, NUP88, ODO1, OGT1, OTUD5, P5CS, PABP1, PAIRB, PAPS2, PA24A, PLIN3, PLST, POP1, PPM1G, PRP8, PRS10, PUR2, RENT1, RGAP1, RIR1, RL3, 4-8, 10, 13A and 36, RNZ2, RPN2, RS2 and 9, SAHH, SEC13, SF3B2, SGT1, SMC1A, SMRC1 and 2, SND1, SPART, SYDC, SYFB, SYIC, SYK, SYLC, SYRC, SYVC, TIF1B, TOM1, TRAD1, TRI25, TTL12, TWF1, TXNL1, TYSY, UBA1, UBP5 and 15, UCK2, USP9X, VATA, VPS35, WAC, XPO1, XRCC5 and 6, ZCCHV, ZFY16, ZNT1 |
|------------------------------------|------------------------------------------------------------------------------------------------------------------------------------------------------------------------------------------------------------------------------|-------------------------------------------------------------------------------------------------------------------------------------------------------------------------------------------------------------------------------------------------------------------|----------------------------------------------------------------------------------------------------------------------------------------------------------------------------------------------------------------------------------------------------------------------------------------------------------------------------------------------------------------------------------------------|-----------------------------------------------------------------------------------------------------------------------------------------------------------------------------------------|---------------------------------------------------------------------------------------------------------------------------------------------------------------------------------------------------------------------------------------------------------------------------------------------------------------------------------------------------------------------------------------------------------------------------------------------------------------------------------------------------------------------------------------------------------------------------------------------------------------------------------------------------------------------------------------------------------------------------------------------------------------------------------------------------------------------------------------------------------------------------------------------------------|

|                        |                                                                     |                                                                                                     |                                                                                        |                                         |                                                                                                                       |
|------------------------|---------------------------------------------------------------------|-----------------------------------------------------------------------------------------------------|----------------------------------------------------------------------------------------|-----------------------------------------|-----------------------------------------------------------------------------------------------------------------------|
| Autophagy              | ATG4B, HSPB8, PI3R4, SHLB1, SNX4, TPPC8, VP33A, VPS16, VPS18, VPS41 | ATG3, EXOC8, PK3C3, RO52, SNX18, TAB2, TBC17, TLK2, TPPC4, VPS11, 25, 39 and 51, WDR6, WDR41, WIPI2 | ARFP2, ATG3, PK3C3, RO52, SQSTM, TAB2, TBC17, TPPC4, VPS25, VPS39, VPS51, WDR41, WIPI2 | DYL1, GSK3A, SNX7, TLK2                 | ARFP2, ATG3, 4B, 7 and 9A, HSPB8, LRSM1, PK3C3, TAB2, VPS39                                                           |
| Translation initiation | GCN1                                                                | CNOT3, EI2BB, GEMI5, IF4G2, IF4G3, IF5A1, T2EB                                                      | CNO11, CNOT3, CNOT8, EIF3F, IF2M, IF4A1, IF4A2, IF5A1                                  | EI2BB, EIF3F, IF4A1, IF4A2, IF4G2, T2EB | 4EBP1, CNO11, CNOT3, EI2BA, EI2BB, EIF3A, 3B, 3C, 3D, 3E, 3H, 3I, 3K, 3L and 6, GEMI5, IF2P, 4B, 4E, 4E2, 4G1 and 4G3 |
